# Supplementary material
Source: publisher figshare collection journal article supplement (https://frontiersin.figshare.com/ndownloader/files/14226290)
Supplement: Supplementary file 1 [file 14226290]

## Sheet: Raw Data
Molecular_feature_.	ESI.Mode	Neutral_mass	Retention_time	A.BG.1	A.BG.2	A.BG.3	A.BG.4	A.HWK2.1	A.HWK2.2	A.HWK2.3	A.HWK2.4	Ctrl.1	Ctrl.2	Ctrl.3	Ctrl.4	Phyt.1	Phyt.2	Phyt.3	Phyt.4	R10.1	R10.2	R10.3	R10.4	R4.1	R4.2	R4.3	R4.4	S.HWK6A.1	S.HWK6A.2	S.HWK6A.3	S.HWK6A.4	S.HWK6B.1	S.HWK6B.2	S.HWK6B.3	S.HWK6B.4	Sl14.1	Sl14.2	Sl14.3	Sl14.4	Sl9.1	Sl9.2	Sl9.3	Sl9.4	Wil3.1	Wil3.2	Wil3.3	Wil3.4	Wil4.1	Wil4.2
Cp958	Positive	100.089	5.91	0.727758	0.542708	1.08685	0.400724	0.424631	0.451849	2.24729	0.542884	0.761135	1.87549	1.12794	1.92771	2.64289	1.87579	1.02557	1.33739	0.642827	0.56697	0.336551	0.323417	3.6103	3.59677	3.11906	1.93459	1.22399	0.652572	2.8049	1.02086	1.42942	0.356161	1.93911	1.97469	0.409153	1.58626	2.7827	0.689744	1.26623	1.75462	1.1975	2.79955	2.29266	1.55692	2.89873	2.13309	0.722079	1.50014
Cp1566	Positive	1008.11	1.33	NA	0.567839	0.560023	0.235369	0.501769	0.37822	0.490429	0.309085	0.181409	0.511904	0.310591	1.2875	0.901035	0.770874	1.31124	0.328865	0.945615	0.696703	0.563333	0.686728	0.929613	0.862464	0.900907	0.824197	0.413209	0.674968	0.636661	NA	0.348845	0.454379	0.627418	0.693235	0.654645	0.581774	0.887827	0.885861	0.59121	1.15945	0.933007	0.522742	0.729528	0.688419	0.937984	0.777318	0.514744	1.29706
Cp1694	Positive	101.084	11.25	0.623245	0.69253	NA	NA	0.603406	0.592388	0.948567	0.584071	0.498875	1.37095	0.775044	0.420799	NA	0.597952	0.243386	0.439806	0.917291	0.291608	0.606928	0.957442	0.918229	1.25159	0.963133	0.65503	0.560151	0.537775	0.543347	NA	0.612644	0.427691	0.286704	0.719898	0.339012	NA	0.515268	0.50977	0.738227	0.875767	0.669166	0.82032	1.12831	0.689646	1.00798	0.93936	0.143318	NA
Cp1529	Positive	1014.67	11.31	5.3398	5.36501	2.41995	3.00538	4.78745	5.62157	7.31601	4.69921	1.3265	4.47263	1.99532	2.24582	3.20561	5.8247	6.2649	2.72132	7.49165	2.76951	6.0521	5.68792	8.82096	8.07199	6.32641	5.30332	6.61304	10.9273	6.34118	1.05413	2.20179	4.25632	3.7999	6.52887	4.52892	2.32357	3.38801	3.08997	6.97381	2.66081	5.39617	6.79508	6.55883	4.88491	7.46525	9.24767	2.84037	2.88876
Cp140	Positive	102.047	1.54	11.5988	7.62854	6.05667	5.89727	9.75625	8.78868	18.4348	7.27064	14.9476	12.2679	10.5038	10.0704	11.8748	9.25549	8.39726	3.88947	12.2016	7.784	5.51518	6.91901	19.451	15.4872	15.1128	14.3159	8.35432	13.8336	11.9405	3.27044	7.59942	7.42559	6.42515	5.07262	6.7264	10.9953	9.047	7.42442	8.57563	8.70887	11.6458	8.6927	11.953	7.29697	7.09407	9.06952	5.51233	12.9737
Cp347	Positive	104.062	2.07	2.67352	6.01373	4.55302	2.67135	5.1021	5.36642	6.80388	3.10441	1.55896	3.32617	3.18877	8.22013	5.70157	5.45478	11.0632	2.47644	8.44681	5.34384	5.19411	5.15943	9.05502	7.97653	6.67711	7.995	3.35387	6.1698	5.30801	1.18514	2.73878	3.8308	5.14194	5.76844	4.70152	4.19281	7.02874	7.29954	5.21776	9.599	7.29428	3.55439	5.84137	6.99952	8.26142	5.00261	3.80623	10.898
Cp1610	Positive	1042.09	2.08	0.285051	0.617413	0.56031	0.230834	0.958817	0.740989	0.736871	0.344283	0.260835	0.388291	0.667603	0.932368	0.620898	0.686191	1.71572	0.28543	1.29443	0.589059	0.677647	0.847887	0.764129	0.835235	0.729514	1.13933	0.378949	1.12329	0.54007	NA	0.295402	0.662738	0.504827	0.606037	0.700617	0.490316	0.752695	1.00006	0.464564	1.33025	0.719864	0.396299	0.642017	0.746355	1.00742	0.532832	0.529507	1.13289
Cp138	Positive	106.064	5.91	6.11346	5.5905	5.50809	2.67367	3.50051	4.5033	15.8893	2.79447	5.42435	12.9993	8.97384	19.3349	20.7619	15.3873	7.09256	9.36142	4.82721	3.55411	3.2796	2.91722	30.5939	31.9031	29.0405	15.3042	12.0167	4.53609	20.2842	8.30366	14.2737	2.80729	15.426	14.1543	2.97191	13.3661	24.5004	4.57726	12.7865	14.066	11.2224	25.1486	19.015	12.3029	20.5491	14.4348	4.69501	13.2065
Cp1358	Positive	106.078	9.39	1.33447	1.46677	1.79153	1.11125	0.822837	0.849013	0.712459	1.13502	0.930435	0.69364	1.18172	0.956904	1.46933	1.46725	0.714641	0.700951	0.894663	1.25783	1.3073	1.25622	0.477885	1.62155	1.28913	0.867596	1.0652	1.43027	1.34292	1.12538	0.92586	NA	1.24147	0.760165	1.31848	1.08917	0.648505	0.960972	0.734851	1.85886	1.19436	1.46144	1.52212	1.42441	1.18074	0.997842	1.00414	1.90795
Cp700	Positive	1072.61	11.26	1.13637	1.69583	0.499786	1.37007	1.91368	2.72762	4.32939	1.55862	1.65987	2.26474	1.84545	1.47826	0.951191	1.60542	1.7037	1.93553	3.76106	1.38254	2.39093	1.94563	2.7452	2.12212	3.11551	2.68099	2.72246	2.91914	2.27029	0.44603	1.46102	1.35216	1.73238	2.32199	1.64042	1.22057	2.9388	1.52371	2.11551	2.02117	1.97986	1.47403	2.79811	2.43387	1.78994	2.78667	0.601754	0.613561
Cp923	Positive	1078.58	11.42	0.381889	0.332738	0.514094	0.445409	0.264151	0.441637	1.16763	0.224511	1.55124	2.42454	1.35779	1.26594	0.162428	0.909211	2.29011	0.894697	1.33122	0.294997	0.511501	0.953538	1.74348	2.60797	2.25813	1.71551	1.93955	0.762675	0.974029	NA	1.91285	0.766511	0.551387	1.18895	0.188749	0.970893	0.72087	0.660526	0.770587	1.46692	1.06584	0.236478	1.74685	3.37857	0.790042	0.699071	0.212691	0.37335
Cp533	Positive	1086.71	10.54	6.26138	5.86364	5.18315	4.3666	4.77322	5.21755	4.91785	5.00805	4.79274	7.32389	3.6964	2.47346	3.90141	5.4543	6.58647	3.00311	4.42021	2.41538	3.30857	5.35975	5.05737	6.43081	3.04442	4.14027	4.69081	5.34758	4.68102	0.423213	3.13143	2.98679	3.08264	5.65839	3.59687	3.35077	4.89846	3.3045	4.25278	3.19112	1.72374	4.0661	4.70405	5.11952	4.809	3.53218	2.06642	3.35024
Cp892	Positive	110.037	1.51	2.80932	1.07567	1.30863	1.19985	2.02944	3.84642	3.67854	1.65065	0.61558	0.697162	0.725629	1.32778	0.588548	1.49052	1.07409	0.420763	2.45386	0.595371	1.69539	1.59647	NA	1.80028	1.31233	1.59431	1.09594	2.03188	1.84881	0.651822	1.42527	0.885051	1.0434	NA	0.803069	1.45345	1.62436	0.242544	0.757084	0.523515	0.370609	0.657812	1.24382	1.07721	1.16749	0.357929	0.549888	0.604533
Cp668	Positive	1103.63	11.42	0.239437	NA	NA	0.293105	NA	0.339659	1.09465	NA	1.89886	4.6486	1.62671	1.69426	NA	0.673908	2.73444	0.931285	1.55165	0.124941	0.413944	0.773469	2.17109	3.66278	2.86074	2.21702	2.36136	NA	0.706569	NA	2.92266	0.788594	0.412801	1.26894	NA	0.609013	0.741961	0.617968	0.614025	1.48267	1.23222	0.114845	1.77902	4.80216	0.652419	0.639913	NA	NA
Cp1208	Positive	112.089	9.39	1.90147	2.21299	2.51023	1.53797	1.19173	1.2748	1.41084	1.68072	1.13013	0.925654	1.43241	1.18922	2.30417	2.10156	0.840898	1.35205	1.46006	1.81732	1.8232	1.72823	1.24432	3.19926	1.96461	1.56199	1.55123	2.12495	2.12501	1.65149	1.33425	2.39301	1.98052	1.09604	2.32396	1.68364	0.720996	1.43659	1.02015	2.26177	1.70802	2.15207	2.40784	2.01564	0.976189	1.5415	1.69016	2.02634
Cp565	Positive	114.032	6.09	0.767172	2.19377	1.90399	0.888827	0.766776	1.69789	2.16773	0.398791	0.38407	2.07355	0.909438	0.865	0.695791	1.8842	1.20795	1.34253	1.63431	1.0568	0.96407	2.48571	2.42114	2.38033	1.89406	1.60148	2.1459	1.18592	2.0473	0.380377	0.318951	0.643095	0.736863	2.8415	1.67221	0.599698	1.41433	1.65298	2.11329	1.1227	2.12999	2.80762	4.20633	1.8072	4.37451	6.45369	0.47947	1.07287
Cp1317	Positive	114.068	9.83	0.832567	0.915545	0.0955788	0.129187	0.696164	0.882468	1.8022	0.567327	0.767071	1.23677	0.531587	0.491571	NA	0.411294	0.707948	0.488376	2.23743	0.416082	1.26313	1.48033	1.93716	2.70771	1.45534	0.752386	0.47222	0.876131	0.615283	NA	0.504416	0.332859	0.325158	0.80424	0.46537	NA	0.716576	0.587817	1.4995	1.47063	0.916894	1.55055	1.52469	2.07807	2.72415	1.7003	0.177939	0.862038
Cp1624	Positive	114.069	8.67	0.262318	0.378742	NA	NA	0.240186	0.152094	1.1086	0.418101	NA	0.211038	0.0418032	0.227206	NA	NA	0.0666268	NA	0.16317	0.189925	0.154785	0.194709	0.752473	0.865631	0.393277	0.235764	0.132743	0.0835496	0.243429	NA	0.144223	0.0287205	NA	0.567131	NA	NA	0.0347301	NA	0.825878	NA	0.154977	0.618634	0.441095	0.338893	0.378568	0.56099	0.00823068	NA
Cp571	Positive	114.105	8.02	2.41238	2.60917	2.48548	0.670049	0.900616	0.599509	4.27333	1.59272	0.679216	3.12682	2.4166	3.59034	2.34373	3.60937	2.97904	1.87145	0.873266	1.01145	0.894488	0.793232	2.43822	3.87856	4.0216	2.65661	2.1076	2.2773	4.72019	1.19766	3.88134	0.813656	3.52798	3.7407	0.866248	1.75082	3.02695	1.72503	2.57239	2.60985	2.53348	4.39932	4.98588	2.88754	4.17205	3.74526	1.42508	2.22484
Cp1512	Positive	118.041	6.1	1.39883	0.891651	0.979826	0.553802	0.533437	0.537569	1.218	0.72022	1.11113	1.17272	0.943005	1.40891	1.17302	1.21805	1.48176	NA	0.809691	0.633356	0.748365	0.543258	1.6131	1.63913	1.31506	1.51793	NA	1.11471	1.65095	0.377138	1.16367	0.657997	1.1593	1.14542	NA	1.26855	1.1586	0.900403	1.11898	1.10386	0.820213	1.20502	1.25653	1.59495	1.32757	0.77637	0.697387	1.2921
Cp825	Positive	118.081	7.29	5.35234	NA	NA	NA	NA	NA	2.6911	NA	NA	NA	NA	NA	2.26761	NA	NA	NA	NA	NA	NA	NA	NA	3.40015	NA	NA	NA	NA	4.38844	NA	NA	NA	NA	2.77362	NA	NA	NA	NA	2.62349	NA	NA	NA	NA	NA	2.649	NA	NA	3.18352
Cp157	Positive	118.099	4.4	4.86417	4.43971	NA	3.65839	3.3733	4.77054	8.15776	6.12291	NA	13.2562	4.84081	4.40896	NA	15.2069	9.22234	5.63093	17.5332	6.4481	14.4995	10.9613	11.506	18.7448	8.42052	8.24184	23.6315	19.5949	19.9066	NA	4.82526	4.39626	4.44418	12.7953	6.45056	6.52569	NA	5.98063	10.118	5.40162	6.64987	12.269	13.8753	8.76378	9.21	12.1257	4.63204	4.3327
Cp96	Positive	1197.51	6.09	0.10038	3.17248	1.87967	0.37982	NA	1.42702	2.70324	NA	NA	2.64534	0.290127	0.0961584	NA	0.967875	0.855653	1.58174	0.790604	0.51157	0.163305	4.62947	3.40727	2.25526	2.2524	1.49943	2.61056	0.525437	2.20428	NA	NA	NA	0.116128	4.28171	1.16165	NA	1.12791	1.15455	3.29362	0.416804	3.27063	4.52421	9.88104	0.86509	13.4363	31.8698	NA	0.256615
Cp124	Positive	1198.01	6.09	NA	2.76586	1.83603	0.316332	0.141437	1.29119	2.46041	NA	NA	2.6652	0.20964	0.0750263	NA	0.869293	0.793285	1.52825	0.713637	0.524543	0.199943	4.1555	3.3883	2.30909	2.2842	1.45186	2.41738	0.488021	2.1879	NA	NA	NA	0.0957506	4.02977	1.13919	NA	1.14041	1.15055	2.97596	0.332795	3.03705	4.30625	8.99177	0.786706	12.1287	28.8318	NA	0.240465
Cp1056	Positive	122.036	5.97	2.66968	1.34894	1.07498	0.99722	0.592922	0.412616	1.5493	0.656301	0.808387	1.39368	0.871253	1.22623	0.701228	0.83778	1.98968	0.611299	1.37863	0.619331	0.801901	0.343303	1.63153	2.51315	0.964497	0.574357	0.786686	0.8823	1.82088	0.302358	1.04507	1.07499	1.67344	0.99809	0.377498	1.30469	1.05466	1.35227	1.07638	1.21042	0.737681	1.72055	2.81403	0.311492	1.10015	1.04062	0.909686	2.1179
Cp699	Positive	122.037	3.98	0.999671	1.9496	0.658035	0.773133	0.748588	1.00608	1.93588	1.35098	0.792715	2.6732	1.22839	0.964846	1.55754	2.91542	3.08263	1.06886	2.99355	1.39551	1.4324	2.71946	3.33639	3.45682	2.02493	2.86058	4.72663	2.56845	1.43935	0.831117	0.415466	0.902121	0.950166	1.59977	1.24217	0.985712	1.56942	1.2342	1.70065	1.17891	1.64108	3.38934	3.78196	2.23498	4.19618	3.39911	0.648133	1.59895
Cp1091	Positive	122.037	4.66	1.08367	1.95303	1.01173	0.899113	1.18488	1.47392	2.21397	1.36112	1.13476	2.88344	1.50504	1.30948	1.63325	2.78209	2.14195	0.691644	2.54868	0.800723	1.85359	2.01919	2.8665	3.28316	1.79977	2.09008	2.65446	2.69531	1.92278	0.428807	0.598124	0.988418	1.1294	1.86545	0.997729	1.08437	1.17388	1.02701	1.398	1.80898	1.33872	2.56039	2.83527	1.66297	2.16641	2.0103	0.95097	0.922949
Cp1602	Positive	124.015	10.59	0.656606	0.458803	NA	NA	NA	NA	0.474413	0.266431	NA	0.487245	NA	NA	NA	NA	NA	NA	0.34435	0.205002	NA	NA	NA	1.67712	0.406923	0.394504	0.57448	NA	0.941884	NA	NA	NA	NA	0.862599	NA	NA	NA	NA	0.660819	NA	0.393928	1.16259	0.836182	0.427229	0.917208	0.893198	NA	NA
Cp245	Positive	124.016	1.94	3.17822	5.0092	5.27658	4.57188	3.11065	5.63622	7.59823	4.26962	2.55623	5.42182	3.46742	10.4545	7.17716	12.8038	16.3966	2.8804	10.4704	10.5486	6.72904	7.78934	14.646	14.0507	8.69357	13.6828	9.7844	16.015	9.06868	2.55945	2.78161	5.41801	10.3792	8.50628	6.82543	5.32629	8.47048	3.68953	10.0775	7.21941	9.2592	10.4397	12.7205	7.91654	8.95916	11.3897	6.97008	7.17593
Cp557	Positive	126.031	5.15	0.463964	0.555205	0.515239	0.245876	0.443354	0.591179	0.746687	0.227689	0.502556	1.4968	0.171081	0.919745	0.277148	0.655485	0.843636	0.228729	0.726413	0.417601	0.361686	0.452857	0.893426	7.08953	0.427392	1.40872	0.547906	1.76487	0.969504	0.503587	0.35641	0.320938	0.343891	1.41409	0.63376	0.386014	0.404005	0.401706	1.22619	1.37287	1.80968	1.24689	2.27883	1.92485	1.71143	1.20645	0.315117	0.446724
Cp576	Positive	126.031	1.61	5.19543	3.55067	2.42939	3.18976	1.86649	3.18968	5.08705	3.66367	1.60371	3.31144	1.44789	4.11467	6.87255	5.43862	5.60654	2.84938	5.50698	1.84549	2.26256	2.45961	5.66035	8.50655	3.93727	3.76805	5.43008	3.96693	5.58218	1.12302	2.69803	1.73054	3.02524	4.88122	1.66866	3.71957	2.13899	1.38522	4.35568	2.4877	2.62505	4.66649	4.82743	3.37325	3.46986	5.80511	2.24488	1.68415
Cp481	Positive	126.104	6.09	1.99683	4.60739	3.53026	1.84922	2.08004	3.35521	3.38353	0.931409	1.05961	3.90453	2.11187	1.73028	1.63842	3.37827	2.93234	2.62397	3.0993	2.21821	1.63036	4.25469	2.87151	4.04763	3.46075	3.03118	3.91949	2.387	3.91812	0.713206	NA	1.31166	1.35223	4.32266	3.03115	1.19982	2.92137	3.19977	3.32703	2.49959	4.01447	4.70892	6.42338	2.58927	6.22845	8.25985	1.10239	1.97459
Cp761	Positive	128.011	11.25	2.10932	2.61549	0.310917	0.538981	2.13011	1.76091	3.65297	2.06765	1.55385	5.54672	3.03591	1.31388	0.780064	1.69269	1.14315	1.55392	3.39901	0.760752	2.20846	3.00787	3.25941	5.50074	3.59926	2.16475	2.09913	1.96228	1.99487	0.340484	2.16237	0.97338	0.931322	2.68765	1.19659	1.1006	1.89664	2.03508	2.63943	3.26509	2.48985	2.51442	4.43974	2.85755	4.23117	3.58403	0.456345	0.78396
Cp1840	Positive	128.011	9.65	1.22479	0.526916	NA	NA	NA	NA	NA	0.156314	NA	0.484683	NA	NA	NA	NA	NA	NA	NA	NA	NA	NA	1.02408	1.853	0.48143	NA	0.414251	NA	1.21855	NA	NA	NA	NA	1.04652	NA	NA	0.305751	NA	1.04204	NA	0.506722	1.28479	0.704272	NA	0.619931	0.622044	NA	NA
Cp1836	Positive	128.048	4.63	0.795515	0.627575	0.621263	0.789171	0.407513	0.558932	NA	0.65789	0.130596	0.635196	0.21513	0.269329	0.0812821	0.295259	0.71312	0.361281	0.539538	0.43899	0.828172	0.634879	0.813869	2.24798	0.825172	1.34434	1.08331	0.71158	0.521032	0.370072	0.27173	0.59744	0.425071	0.77336	0.867168	0.367102	0.909802	0.526447	0.845434	0.858935	0.790475	0.568142	0.558527	0.874769	0.276361	0.734946	0.103863	0.0851992
Cp433	Positive	128.12	6.2	3.2076	3.80102	2.83489	1.9314	2.15258	1.4543	6.78347	2.5988	1.43845	5.60148	2.74578	8.46549	4.35539	4.95153	3.81811	3.09351	2.17801	1.65638	2.26469	1.43287	6.14475	7.65279	8.13914	4.09075	3.42174	2.58897	6.52359	1.28995	3.75993	1.97385	5.04323	5.56044	2.65023	3.82641	6.95902	2.11232	4.49338	7.76531	3.54129	7.1993	5.92212	4.62904	8.62465	4.12566	2.47783	6.2011
Cp1339	Positive	128.12	9.5	0.616897	0.0747048	0.410503	NA	NA	0.0569681	0.929451	0.255554	1.02601	1.36086	1.34407	1.02994	0.783598	0.443616	0.575303	0.589689	0.175484	NA	NA	NA	0.980844	1.01017	1.38657	1.02803	0.674005	0.157846	1.42749	NA	0.909632	0.545147	0.808512	1.37205	0.279511	0.0496808	0.721754	0.324993	0.779317	1.06448	0.720519	0.575921	1.05898	1.39374	1.11381	0.389606	0.139921	1.21059
Cp150	Positive	129.151	3.43	8.66475	7.69116	7.58721	3.88215	3.57122	3.12062	18.0398	4.80811	11.665	14.8566	11.3823	16.5215	9.06608	16.6804	14.1139	11.2182	5.23421	5.44074	3.65875	5.48967	22.3104	19.9331	21.4711	19.3231	11.9646	6.80681	25.2396	5.02468	18.0351	5.54535	16.6972	16.7721	3.46907	8.49048	14.2312	7.14078	15.3954	15.2307	13.2128	17.5268	20.6559	19.7854	24.2746	17.6805	6.55815	14.0468
Cp793	Positive	130.043	3.38	0.896338	0.914859	0.550294	0.811956	1.62096	0.507339	1.45889	0.689788	0.412801	0.312234	0.617439	0.21742	0.920473	1.2738	1.49789	0.449542	1.13865	0.285647	0.625247	0.802626	1.48638	1.72999	0.760899	0.635481	0.908617	4.11646	1.68309	NA	0.538336	0.941814	0.554236	0.850356	1.23626	1.26926	0.541158	NA	1.23597	0.478267	0.504233	1.2722	0.39557	0.501251	0.807472	0.44687	0.232157	0.169
Cp1394	Positive	130.043	4.89	0.587669	0.628536	NA	0.161705	0.97968	0.666957	1.75803	0.225244	0.417906	0.317038	0.81223	0.314855	NA	0.764733	0.994991	NA	1.75638	0.352968	0.435244	0.311461	0.801671	1.12858	0.528235	0.589606	0.517553	1.31547	1.47961	NA	0.177778	0.336111	0.434931	NA	0.292252	0.410572	0.40148	0.594487	NA	0.295114	NA	0.44368	0.854682	0.677377	0.508661	0.0795999	0.209817	0.150307
Cp560	Positive	132.006	5.73	3.27905	NA	2.06811	1.14908	0.863706	1.67492	4.99328	1.5585	3.67104	4.89359	4.55805	3.89073	3.70948	4.43923	5.32132	2.5525	1.81549	NA	1.50568	NA	5.57876	3.77629	4.17771	6.37019	3.31557	1.91601	5.86743	1.53269	3.29566	1.86724	3.11058	3.93876	1.66709	3.41697	2.96342	1.82989	3.12029	3.52114	1.91488	3.79723	4.75424	6.60909	4.24289	3.39735	1.63294	3.84388
Cp85	Positive	132.068	2.6	13.0105	17.4578	18.9758	10.3633	9.77176	11.7444	13.2329	9.43276	18.9149	19.8253	16.0275	16.7409	7.95491	14.1758	27.3179	10.2577	14.819	11.0941	15.2693	12.7231	40.4845	14.7377	11.089	10.245	12.9533	22.7521	15.8724	4.14351	5.36421	11.8065	13.0706	15.8405	10.1258	24.8832	11.2908	19.5152	5.0534	10.619	10.6455	8.61491	10.8765	17.0357	13.6975	9.99074	15.4745	15.4474
Cp286	Positive	133.008	5.73	7.26563	8.60986	4.90285	2.2673	1.6507	3.60095	11.0639	3.46862	8.02522	10.3923	9.55421	7.93491	7.74885	9.35909	13.4102	5.48907	4.26104	2.53599	3.54515	2.14021	13.4911	7.6539	9.19506	14.6171	6.90744	4.78352	9.16074	2.849	6.91906	3.73474	8.15326	9.0458	3.5333	7.4771	6.01159	1.76852	7.5869	7.0117	4.4325	6.26159	10.5535	16.5041	4.65785	7.33835	3.41665	7.97553
Cp924	Positive	133.04	4.4	0.21567	0.974183	0.654314	0.470737	NA	0.42538	0.8495	0.545573	NA	1.16471	0.369241	1.26609	1.6743	3.22312	4.0901	0.712933	2.04917	1.42227	0.565321	1.79899	2.13029	2.07463	1.21258	2.03964	2.64313	2.48637	1.00524	NA	NA	0.718554	0.840173	1.3092	1.1212	0.297238	1.01083	0.856643	1.46703	1.41457	1.2465	1.69042	2.288	1.03126	1.45362	2.2556	0.485741	1.19482
Cp1139	Positive	134.022	9.06	1.53346	1.34565	1.20761	0.621161	0.585754	0.677034	2.19137	0.795749	1.48309	2.22951	1.44864	2.09052	1.65758	2.27642	2.00915	1.18098	0.951772	0.675198	0.881849	0.753583	2.45272	2.17342	1.91576	2.47585	1.67993	1.14247	2.66524	0.54451	1.63319	NA	1.60705	1.98448	0.685512	1.52514	1.5309	1.08491	1.88107	1.70042	1.04829	1.76538	2.37631	2.41655	2.26708	NA	0.894008	1.71797
Cp305	Positive	134.094	2.84	5.06833	4.95111	7.80227	1.81648	2.67029	1.91811	3.87525	3.28664	0.238159	3.61519	2.36294	5.41834	5.0119	5.34246	6.49551	2.10927	4.51026	4.24625	2.27435	2.48535	7.96778	5.60713	11.6421	2.67264	3.02989	5.46479	8.38036	1.75438	5.10199	2.77071	3.30854	5.32945	3.25628	8.92914	3.95885	3.97743	3.22901	3.15128	2.89465	4.9256	6.67562	2.6483	4.46738	5.73837	2.91301	7.01736
Cp1049	Positive	136.051	4.53	2.30152	NA	NA	0.21546	1.7334	NA	1.71192	NA	0.288498	0.865448	0.687818	NA	NA	NA	0.300277	NA	0.470883	NA	0.22593	0.729061	0.393178	NA	0.814255	NA	3.05621	0.341977	0.943444	NA	NA	NA	NA	0.244319	NA	0.299637	1.03799	0.569539	0.260044	0.245697	NA	NA	1.33857	1.79684	2.37208	NA	NA	NA
Cp1022	Positive	138.031	3.4	0.696906	0.650645	0.796252	NA	0.977647	NA	0.552298	0.393169	0.696312	1.13989	0.335798	0.589999	0.94956	3.14087	2.63252	0.411563	1.24948	0.415264	NA	1.47715	2.37425	1.2014	0.559212	0.749519	1.92483	2.16304	0.729508	0.267323	0.32493	NA	0.902181	1.06067	0.759856	NA	NA	0.426787	0.720766	0.561967	0.416722	1.96071	1.44812	1.16922	NA	1.47828	0.670996	1.18541
Cp1459	Positive	140.048	4.86	NA	0.213266	NA	0.105075	0.69488	NA	0.708584	0.327539	0.222369	0.431043	0.519732	0.312586	0.189749	0.800125	0.294649	0.203695	0.2974	0.123539	0.595142	0.78335	0.912672	1.71321	0.318224	0.436339	0.643392	0.954317	1.20513	0.322231	0.178388	0.336924	0.551826	1.17426	0.216726	NA	NA	0.24708	0.468172	0.700645	0.405456	0.709294	0.661321	0.975237	NA	1.42671	0.108567	0.390009
Cp689	Positive	142.082	6.92	2.70363	1.49574	1.51109	1.06635	0.724623	0.635651	2.40862	1.02894	1.18878	2.13408	1.37701	3.17606	2.14283	2.06455	1.62749	1.37184	NA	0.882888	NA	NA	2.8478	3.39967	2.88585	2.05671	1.93773	1.29737	3.93622	0.545982	2.91192	0.817043	2.01514	2.22186	NA	1.9909	1.95448	1.41337	2.55621	1.7659	2.33854	2.61229	2.45852	1.89608	2.61275	2.23597	1.05196	2.58955
Cp1635	Positive	143.076	2.82	NA	NA	NA	NA	0.69809	NA	0.984345	0.333406	NA	0.794996	NA	NA	NA	0.534279	NA	NA	0.651294	NA	NA	0.506049	NA	0.532708	NA	NA	NA	1.16742	0.64103	NA	NA	NA	NA	NA	NA	NA	0.424717	NA	NA	NA	NA	NA	NA	NA	NA	NA	NA	NA
Cp275	Positive	1431.62	6.09	NA	0.726311	0.393905	0.086936	NA	0.284169	0.608225	NA	NA	0.544248	NA	NA	NA	0.211869	0.163981	0.309715	0.140695	0.108579	NA	1.06041	0.803298	0.484582	0.486206	0.26196	0.547906	0.0512295	0.475467	NA	NA	NA	NA	1.12651	0.260597	NA	0.21962	0.171435	0.819592	NA	0.734799	1.1814	2.60941	0.168765	4.07752	11.8295	NA	NA
Cp325	Positive	1432.12	6.09	0.0166809	0.696924	0.383031	0.0614967	NA	0.273823	0.64904	NA	NA	0.60061	0.0319451	NA	NA	0.168558	0.177063	0.334107	0.164709	0.0621785	NA	1.05358	0.841111	0.40337	0.454411	0.287374	0.570051	NA	0.44894	NA	NA	NA	NA	1.03972	0.210422	NA	0.181102	0.225067	0.843106	NA	0.836981	1.1343	2.62099	0.205026	3.98702	11.2815	NA	0.0464145
Cp161	Positive	144.042	6.09	2.88225	7.76696	6.66734	3.26309	2.25507	5.81612	7.40926	1.55569	1.31747	8.51838	3.29958	2.52139	2.23512	6.14501	5.87214	5.32571	5.49882	4.01764	3.10082	8.76813	8.27124	8.33541	7.73153	6.49335	7.62991	4.84239	7.8612	1.13774	1.15501	2.36537	2.21596	9.35337	5.61741	2.24255	5.3185	6.03893	8.29743	4.55272	7.96645	9.8164	14.8632	5.30042	15.1157	22.5174	1.94923	3.55586
Cp625	Positive	144.044	3.55	1.31366	NA	2.16641	0.945346	2.32579	2.08364	4.93503	1.73522	2.20885	NA	1.42044	NA	0.324993	5.18392	3.80807	1.04287	3.91654	1.35519	2.65293	NA	NA	4.95078	2.12959	4.60528	3.29238	4.94713	1.30531	0.54554	NA	2.21188	1.18133	1.80682	NA	1.8348	2.25884	1.62096	1.64186	1.97438	0.40991	NA	3.29373	NA	3.85581	NA	NA	0.783833
Cp1219	Positive	144.114	8.9	0.351036	0.50206	0.411933	0.265564	0.138869	0.233784	1.30234	0.120138	0.658439	2.05706	0.69593	1.92998	1.13591	1.20415	0.535753	0.799589	0.405769	0.191327	0.0257029	0.0879607	1.07219	1.62424	1.24656	0.838272	0.717905	0.366921	0.938139	0.552459	1.23115	0.209307	1.10069	1.39953	0.255212	0.525036	1.2542	0.290573	0.86173	1.56097	1.28344	1.1971	1.9312	1.63394	1.81476	1.08218	0.173497	0.438331
Cp1199	Positive	145.053	2.81	0.872867	NA	1.22478	0.65014	1.59207	1.84354	2.31226	NA	1.26476	1.8393	NA	1.31686	NA	1.22386	NA	NA	1.32106	1.11091	NA	1.32161	2.50802	1.59939	1.78312	1.99064	NA	2.60439	1.73381	0.241415	0.648761	0.982728	0.974268	0.943812	0.806747	1.04203	1.01627	0.674535	0.831116	1.54861	1.29929	0.825553	1.55928	0.868362	1.09457	1.11589	0.952929	NA
Cp1855	Positive	145.111	1.78	NA	NA	NA	NA	NA	NA	NA	NA	NA	NA	NA	NA	NA	NA	NA	NA	NA	NA	NA	NA	NA	NA	NA	NA	NA	3.80681	4.42089	0.466933	6.61731	0.943034	2.43923	3.92666	NA	NA	NA	NA	NA	NA	NA	NA	NA	NA	NA	NA	NA	NA
Cp530	Positive	146.058	4.35	1.08234	0.989975	0.816283	0.988814	1.49407	0.302039	0.551781	0.713131	1.14331	2.32927	0.748464	1.07987	0.26206	1.01361	2.8502	1.84845	0.926219	0.482234	1.00994	0.824342	1.65159	7.40092	0.945802	3.55471	1.80408	0.76053	2.09271	NA	1.02604	1.29757	0.949618	2.62616	2.62029	NA	2.77247	1.53171	3.23518	1.34817	1.63165	1.292	4.0371	2.38125	3.00484	5.35106	1.07926	1.01133
Cp1667	Positive	146.071	8.8	NA	0.605878	0.689083	0.33967	0.368677	0.456551	0.937847	NA	0.703673	0.855681	NA	NA	NA	0.859435	0.953007	0.49533	0.46842	0.410355	0.410678	NA	1.15446	1.16119	1.0184	1.02008	0.823031	0.621057	1.28315	NA	NA	NA	0.772906	0.708744	0.355562	NA	0.885301	0.631976	0.836936	NA	0.72196	0.851577	1.01394	NA	1.12734	0.95899	0.548581	0.80634
Cp848	Positive	146.073	7.8	3.00241	2.15477	2.32652	1.40314	1.22275	1.21917	3.19767	1.38422	2.2967	2.97887	2.20621	2.76931	2.36914	3.17836	2.95896	2.03235	1.49239	1.33742	1.61573	1.18533	3.52532	3.88172	3.19438	3.5899	2.72924	2.23492	4.23785	0.874984	2.62286	1.48398	2.59195	3.07426	1.2867	2.52808	2.83423	1.95837	2.96955	2.76984	2.13156	2.65232	3.67096	3.47549	3.57722	2.76596	1.52346	2.64321
Cp458	Positive	146.994	8.64	1.34436	1.84331	0.807699	0.240788	0.25602	0.665748	2.36199	0.561339	2.75996	2.18131	3.05862	1.40791	1.61953	1.79547	3.55708	1.03538	0.640056	0.36115	0.474012	0.151644	2.79914	1.01222	1.51784	4.67709	1.50576	0.689989	1.92886	0.63666	1.02006	0.761092	1.42618	1.54019	0.765372	1.74871	1.02788	0.579011	1.15064	1.39712	0.553097	1.4811	2.12601	4.42306	1.57716	1.05619	0.529376	1.9957
Cp1480	Positive	148.016	9.05	1.08972	0.718621	0.619975	0.311576	0.305876	0.407241	0.720079	0.295641	0.617242	0.892509	0.568399	0.960308	0.658956	0.602316	0.779899	0.292705	0.622354	0.338359	0.23019	0.477257	0.600135	1.02742	1.02345	0.674319	0.747736	0.949757	1.43467	NA	0.595074	0.225293	0.628404	0.700717	0.324695	0.644862	0.721754	0.706287	0.558384	0.551003	0.277203	0.527409	1.02279	0.593267	1.12413	0.673621	0.469149	1.0346
Cp996	Positive	148.016	6.79	2.35053	1.89138	2.03034	0.961163	0.950258	1.01226	2.78164	1.1327	1.08264	2.73341	1.73315	3.24485	1.84883	2.29145	2.67679	1.20773	1.59075	1.17485	1.36168	1.28135	2.7433	3.37593	3.10118	2.37954	2.15111	2.38365	3.23761	0.79358	2.17775	1.27616	2.42762	2.2118	0.964629	2.30988	2.21136	1.61109	2.1836	2.42994	1.73894	2.36577	2.66105	2.18835	3.11736	2.07948	1.17189	2.71582
Cp7	Positive	148.037	5.73	91.2594	101.782	56.4186	28.8713	19.3258	38.3249	144.809	40.2424	103.817	137.111	121.155	103.997	97.9278	113.87	160.483	66.8353	45.4688	30.0253	40.7032	22.3471	168.701	93.7121	112.038	190.346	82.9254	57.6802	154.513	35.6381	83.0415	46.4121	101.806	110.564	40.9074	89.8041	80.017	41.714	89.6404	91.0268	56.2112	112.255	134.977	212.876	118.797	85.8878	40.7347	102.961
Cp1859	Positive	148.052	9.8	NA	0.442461	0.343254	0.307815	NA	NA	NA	0.259832	0.527606	0.580435	0.319826	1.042	NA	0.353923	NA	NA	0.193803	NA	NA	NA	0.352654	1.14109	0.711774	NA	NA	0.459992	1.63254	NA	0.270266	0.29872	1.47614	0.212623	NA	NA	0.336566	NA	0.744629	1.794	0.485237	1.02667	3.02814	0.918937	0.354445	NA	NA	0.884037
Cp1186	Positive	148.054	1.55	0.677273	0.448641	NA	NA	NA	0.454939	1.5019	0.440467	1.14532	0.641441	NA	0.552698	0.657733	0.499209	NA	NA	0.905438	0.637446	NA	0.374534	1.38026	1.36573	1.32298	1.04393	0.497232	NA	NA	NA	0.558103	0.323783	0.408638	0.267581	NA	0.712468	0.437852	0.635178	0.515432	0.59656	0.801872	0.550321	0.626413	NA	NA	0.661437	NA	1.05024
Cp1502	Positive	148.063	5.33	1.15246	0.96045	1.1076	0.696373	0.952826	0.793254	1.20198	0.843658	1.02624	1.56501	0.85603	1.60463	0.912181	1.38466	1.1036	0.97825	1.23101	0.770452	0.818657	1.09481	1.5452	1.65179	0.899133	0.768807	1.05204	1.67099	1.51285	0.314723	0.462808	0.857821	1.00155	1.43109	0.774435	1.23793	0.935691	1.24221	0.503559	1.26354	0.624232	1.14519	1.06944	1.40369	1.14574	1.25329	0.949141	0.996576
Cp671	Positive	148.088	5.5	4.03249	2.6159	2.92217	1.66616	1.51975	1.53303	3.88132	1.9755	3.10509	4.06625	3.03192	4.11467	4.04684	3.76565	3.6085	2.44306	2.26575	1.85846	2.14711	1.91183	5.38035	5.39974	4.73447	4.45827	3.92783	2.96729	5.82685	1.2505	3.8972	1.72025	3.03992	4.02229	1.48989	3.37575	3.49928	2.48028	3.97004	3.45473	2.74439	3.51366	4.14118	4.70797	4.57028	3.64332	2.08693	3.04072
Cp1577	Positive	148.109	4.04	0.461602	1.0916	0.857777	0.877434	0.048893	0.70189	0.734804	0.961719	0.237209	0.738633	0.484792	0.822169	0.320507	0.652091	0.388961	0.413274	0.680387	0.574917	0.7735	0.527154	0.854393	1.35892	0.722418	0.373261	0.177425	1.11055	1.0171	0.153387	0.681339	0.389758	0.334798	0.765742	0.644006	1.46855	0.797403	0.977382	0.714481	0.704351	0.606415	0.927669	0.85259	0.451357	0.845259	0.66428	0.73253	1.1287
Cp535	Positive	148.109	3.53	2.50213	NA	NA	0.257932	1.27828	0.586073	3.07044	NA	NA	1.24493	0.480425	NA	NA	1.96953	0.723464	0.293347	0.325262	NA	0.507809	4.67936	0.817528	4.0861	4.14988	0.779233	3.94867	0.386099	6.23631	NA	NA	NA	NA	0.672694	NA	0.569777	2.64428	0.426921	0.168319	0.471472	NA	0.612694	3.57107	0.858956	7.6334	0.26777	0.064539	NA
Cp740	Positive	148.11	3.92	3.97256	2.82628	2.68279	1.84479	1.21195	1.23691	2.13867	1.80318	0.648823	1.6233	0.84143	2.20228	1.99304	1.03268	3.36237	1.11423	1.75577	2.14305	1.68758	1.35625	2.21473	2.63314	2.09165	1.13581	1.47281	1.74636	2.72188	0.728515	2.07355	1.93199	1.88565	2.06774	1.66025	2.55517	1.33742	2.20224	1.32885	1.57162	1.73278	1.95024	2.77735	1.28441	2.48502	1.7757	2.07504	3.60431
Cp1713	Positive	148.124	9.39	1.35956	1.38149	1.66218	1.22031	1.05842	0.801853	1.05086	0.91821	0.967951	0.718779	1.30913	1.02682	1.88879	1.81438	0.762406	0.984241	1.23947	1.30598	1.54814	1.24975	1.09374	1.79759	1.65812	1.45798	0.994984	1.93398	1.48882	1.22504	0.763945	1.61458	1.52346	0.760301	1.44734	1.09679	0.58978	0.874254	0.591792	1.90396	1.13986	1.49397	1.33052	1.62808	0.969496	1.1125	1.1033	1.62769
Cp1386	Positive	150.017	2.85	0.543826	0.852788	0.589355	0.369644	NA	0.293305	1.58831	0.51893	0.836999	1.70384	0.997536	1.44351	1.17614	1.24099	0.825534	0.958886	0.510752	NA	0.394915	0.361847	1.90422	1.98202	1.26621	1.43205	1.55813	0.402996	1.96803	NA	NA	0.362528	1.21178	1.61773	0.382226	0.884092	1.02397	0.481487	1.20372	1.7364	0.989994	1.65959	1.3746	1.82697	1.48457	1.2801	NA	NA
Cp482	Positive	150.068	8.01	5.26067	3.49835	3.64802	2.41087	1.77063	2.10849	5.84446	2.33017	3.84664	6.00786	4.10432	5.18163	4.89242	5.4724	4.57717	3.89653	2.02438	1.92999	2.39519	1.73091	7.1264	7.45459	6.46928	5.37135	4.61473	3.3507	7.56082	1.67445	6.50774	2.17598	6.01498	5.49011	1.50815	4.4429	4.66861	3.23646	5.98962	4.61002	5.66669	5.5704	8.54698	6.29215	6.37556	5.60124	2.25912	4.06998
Cp1196	Positive	150.089	6.4	0.757872	1.11261	0.703392	0.294432	1.34525	2.7905	0.207435	0.740019	0.119079	NA	NA	NA	0.174933	0.549147	1.67419	NA	0.756122	0.69495	0.544162	0.801406	NA	NA	0.306352	0.267043	0.430274	0.998975	0.248267	NA	0.164112	1.76631	NA	0.163786	1.14287	1.69818	0.0606198	1.81188	0.253525	NA	0.187204	0.295881	0.875594	0.265007	0.417191	0.238664	2.24567	1.90999
Cp1380	Positive	150.14	9.39	2.58435	2.86748	3.77837	2.57158	1.97198	1.77622	1.97877	1.94886	1.7425	1.18457	2.12872	1.7344	3.4602	3.50578	1.81581	1.73494	2.59686	3.04733	3.29082	2.99188	2.20822	3.78294	3.0874	2.81783	1.94581	3.77395	3.23106	2.64703	2.12882	3.11996	2.87515	1.85307	3.23185	1.8269	1.20318	1.91047	1.29964	3.27204	2.43942	3.09883	3.04777	3.1974	1.98236	2.14514	2.4206	3.56298
Cp824	Positive	150.14	9.39	2.61949	3.00302	4.03835	2.62932	1.8068	1.73807	1.96352	1.94593	1.73858	1.17192	2.04299	1.73851	3.27018	3.28502	1.46533	1.5888	2.13244	2.85776	3.05154	2.67017	1.84622	3.26701	2.50212	2.45643	1.94841	3.41481	2.87278	2.26666	1.76192	2.98449	2.9262	1.62535	3.31381	1.96691	1.16327	1.87698	1.15728	3.33181	2.19902	3.11976	2.99919	3.04118	1.96702	2.2556	2.4918	3.36117
Cp1574	Positive	151.008	4.24	0.432965	NA	NA	NA	NA	NA	0.8619	NA	NA	NA	NA	0.309324	NA	NA	NA	NA	NA	NA	NA	NA	0.301287	NA	NA	NA	NA	NA	0.614815	NA	NA	NA	NA	0.753771	NA	NA	NA	NA	0.744396	NA	NA	0.562909	NA	NA	NA	1.09166	NA	0.291076
Cp750	Positive	152.01	3.6	NA	NA	0.609244	NA	0.829791	0.917133	0.552944	NA	1.1471	NA	2.21544	NA	NA	2.22341	3.63299	0.827405	0.92822	NA	0.803605	0.716251	NA	NA	0.176715	1.52158	0.712694	1.29857	NA	0.406579	NA	1.64723	0.7327	NA	1.12671	0.174024	0.997069	1.7896	NA	3.47604	NA	NA	0.688185	0.807836	NA	NA	0.752519	NA
Cp454	Positive	152.011	10.59	3.67186	2.70544	0.739735	0.808306	0.55109	0.320043	2.87347	1.39339	1.18913	3.14364	0.952863	1.58661	0.602548	1.43331	1.20324	1.13616	1.89477	0.875992	1.74822	2.29906	4.4281	10.0448	2.0297	2.06023	3.40858	0.931518	5.52616	0.647553	0.881934	0.708528	0.996617	4.82054	0.820539	0.63216	2.52633	0.964307	4.3182	2.07259	2.32754	6.43187	5.33352	2.51607	5.76232	5.23045	1.05614	0.842709
Cp1280	Positive	152.047	4.87	1.64772	0.963197	0.775934	0.684317	0.39735	0.505458	2.01041	0.702743	0.789747	1.66861	0.828701	1.89849	1.10383	1.7638	1.09265	1.02062	1.01088	0.53214	NA	0.40418	1.72641	2.20935	1.72567	1.30263	1.70833	1.18311	1.98738	0.426599	1.47188	0.577525	1.25286	1.47612	0.415589	0.906251	1.24106	0.668798	1.38659	1.33118	1.02681	1.75167	1.59611	1.35271	1.68076	1.33844	0.511478	1.29452
Cp1126	Positive	152.083	10.97	0.33967	0.30033	0.182716	0.627797	1.08421	2.19287	0.0844721	0.836325	NA	0.0863047	NA	0.377968	NA	NA	NA	0.222738	3.30757	1.33766	1.04828	NA	0.19869	0.45292	0.133594	NA	NA	0.354047	NA	2.10797	0.206574	0.178013	0.156444	0.0969931	0.312743	0.734627	0.480285	1.83643	0.296827	0.424062	NA	0.147799	0.543888	0.130868	0.0481053	0.38541	0.524804	0.403742
Cp1017	Positive	152.084	9.39	1.77112	2.61316	3.22264	1.97696	1.55313	1.17873	1.62357	1.97941	1.48214	1.16968	1.71368	1.05661	2.74089	2.39811	1.18164	1.13059	2.01838	2.35343	2.07398	2.20512	1.43271	2.97683	2.09698	1.6192	1.62769	2.68016	2.23971	2.24369	1.3589	2.60449	1.87382	1.1276	2.62988	1.18867	0.689424	1.47741	0.663496	2.53696	1.94173	2.26465	2.9498	2.58164	1.88266	1.58049	1.74399	2.40541
Cp1265	Positive	152.118	9.55	2.6654	3.0526	3.02962	1.72832	2.04559	1.04276	1.97282	2.21957	0.458272	NA	1.61597	NA	1.15711	4.39285	NA	3.36118	1.54765	4.35927	1.76185	2.09276	4.34488	2.32476	4.4449	1.35229	3.63369	3.60135	0.867295	1.69477	1.93164	3.16061	3.8997	NA	3.0121	7.29715	0.669217	0.75058	NA	3.81533	2.72474	1.82267	NA	NA	1.59138	5.31885	0.951492	3.20908
Cp702	Positive	152.118	9.55	3.00064	3.15229	3.36973	2.00904	2.38955	1.21554	2.23541	2.44469	0.788085	NA	2.0375	NA	1.89763	4.93295	NA	3.60853	2.07841	4.04838	2.50113	2.55098	4.6562	2.66433	4.7331	2.04485	4.23161	3.7891	1.05096	2.85768	2.29208	3.308	4.11333	NA	3.13426	7.50971	0.799928	1.06663	NA	4.53188	3.29369	2.36125	NA	NA	2.37724	5.70182	1.65698	3.24177
Cp261	Positive	152.119	9.39	22.944	26.4837	32.5975	19.9867	15.7162	14.107	18.2026	18.5765	16.0992	8.95487	18.0987	13.7446	27.5897	27.2445	12.4712	14.1492	19.158	24.5579	26.2922	23.2852	14.876	32.041	25.7959	21.3776	17.196	31.5603	25.0122	21.324	16.4143	27.8295	24.304	14.1898	27.4169	17.1407	9.96816	16.1768	10.082	29.9994	20.2127	26.5157	25.2412	26.1726	16.4934	18.3976	20.173	29.3656
Cp261	Positive	152.119	9.39	22.944	26.4837	32.5975	19.9867	15.7162	14.107	18.2026	18.5765	16.0992	8.95487	18.0987	13.7446	27.5897	27.2445	12.4712	14.1492	19.158	24.5579	26.2922	23.2852	14.876	32.041	25.7959	21.3776	17.196	31.5603	25.0122	21.324	16.4143	27.8295	24.304	14.1898	27.4169	17.1407	9.96816	16.1768	10.082	29.9994	20.2127	26.5157	25.2412	26.1726	16.4934	18.3976	20.173	29.3656
Cp362	Positive	152.119	9.39	22.9526	25.5227	34.0958	20.4036	14.9302	14.3189	17.4945	18.7526	15.7433	9.56301	17.8335	14.3005	26.6812	25.7706	12.47	13.2873	19.261	24.4045	26.1097	23.0861	14.4625	31.8366	24.5454	20.8419	14.2539	29.8025	24.2699	21.108	15.684	27.5603	23.9777	13.4825	27.393	17.1571	10.0449	16.2386	10.0999	30.0128	20.1648	26.512	24.0175	25.6412	17.5601	18.4522	20.2873	29.4287
Cp362	Positive	152.119	9.39	22.9526	25.5227	34.0958	20.4036	14.9302	14.3189	17.4945	18.7526	15.7433	9.56301	17.8335	14.3005	26.6812	25.7706	12.47	13.2873	19.261	24.4045	26.1097	23.0861	14.4625	31.8366	24.5454	20.8419	14.2539	29.8025	24.2699	21.108	15.684	27.5603	23.9777	13.4825	27.393	17.1571	10.0449	16.2386	10.0999	30.0128	20.1648	26.512	24.0175	25.6412	17.5601	18.4522	20.2873	29.4287
Cp121	Positive	152.12	9.39	22.9577	26.5534	34.2091	20.5958	15.7946	13.5689	18.1376	18.1975	15.387	9.87108	18.3331	14.3811	27.0453	26.6722	12.0208	14.0312	18.3569	24.5586	25.2348	22.9631	14.257	30.8225	26.0657	21.3892	17.1091	31.416	24.4646	20.9443	16.308	27.5333	24.0793	14.13	27.266	17.0366	9.39025	16.0027	9.89855	29.7773	20.1782	25.1965	25.6696	26.0406	16.7875	18.7404	19.5089	28.9091
Cp991	Positive	154.026	1.83	0.535412	0.680308	0.480899	0.364224	1.09587	0.845117	0.799256	0.566227	0.504337	1.12853	0.472064	0.9535	1.05789	0.963027	2.36251	NA	1.14788	0.348059	0.411672	1.43519	3.72021	2.15616	0.757078	0.619711	2.50974	1.27323	1.11899	NA	0.158499	0.389352	1.10288	1.2352	0.249301	0.572317	0.285292	0.691478	0.812492	0.573704	0.781567	1.23161	1.50008	0.818196	0.600689	1.10628	0.475681	0.523784
Cp1395	Positive	155.006	3.35	NA	0.361577	NA	0.275297	0.180594	0.352557	0.59195	0.347094	NA	0.338173	0.171705	1.09065	0.445421	1.13579	1.00792	0.331219	0.815695	1.05049	0.565605	0.530936	0.948452	1.34736	NA	1.0176	0.382726	1.42034	0.438641	NA	0.192298	NA	0.466373	1.23438	0.761038	0.338309	0.814199	0.29164	0.948916	0.629607	0.704537	1.11719	0.909859	1.02772	0.523581	1.30798	0.539958	0.694437
Cp490	Positive	156.003	7.07	3.27373	3.02211	0.824439	1.36908	1.64803	3.48621	5.68714	2.96399	1.07267	2.45048	1.05731	0.982291	NA	3.11081	3.11655	1.55532	5.84486	0.414095	3.86139	4.83406	4.02069	8.74116	7.85012	3.76949	4.66306	5.22702	3.53097	0.333713	NA	1.9137	2.03815	5.35339	NA	NA	2.12851	0.905739	3.20958	2.0102	2.45998	5.2813	5.05811	4.72351	5.19217	5.04309	1.19632	NA
Cp428	Positive	156.003	10.55	4.65027	2.84826	NA	NA	NA	NA	2.28307	NA	0.869529	3.1257	0.625301	1.9131	NA	NA	0.915891	0.779262	1.6828	NA	1.21002	1.87243	5.35459	10.6255	2.25759	2.17114	3.45808	NA	5.37963	NA	0.53553	NA	NA	5.46902	NA	NA	2.2596	NA	4.80592	2.09514	2.86845	7.4775	5.09543	2.24097	5.35893	5.4239	NA	1.05698
Cp564	Positive	156.005	11.25	2.56044	3.2031	0.239519	0.598929	2.82627	2.3537	4.45661	2.58829	2.00156	7.20732	3.83217	1.82758	0.865967	2.21081	1.45149	2.09932	4.3788	0.804464	2.97045	3.91248	4.28213	7.78434	4.70663	2.48041	2.54843	2.30868	2.48423	0.329149	2.60664	1.43589	1.079	3.59759	1.33004	1.20674	2.60248	2.69427	3.7129	4.53049	3.19072	3.38382	5.76271	3.88664	5.29981	4.81864	0.437402	1.00433
Cp327	Positive	156.005	11.59	4.35341	4.73812	1.04593	1.71383	4.85443	3.61627	7.5463	3.37695	5.99885	14.8542	9.86218	4.08673	1.91462	4.23916	3.63071	3.97612	7.1573	1.31183	3.92331	5.03267	8.4763	9.98499	7.15144	3.25052	4.77548	5.66461	3.4194	0.81728	5.29319	3.23823	1.73271	5.78231	2.8403	2.94429	2.39751	4.57832	4.86622	5.94768	4.90254	3.32187	9.09151	6.59273	7.71163	6.11322	1.72126	1.11407
Cp656	Positive	156.042	4.06	5.88953	2.49368	1.60982	2.01147	0.88735	1.24819	1.85774	1.53772	0.681353	1.52242	0.956108	1.32877	0.673772	1.34248	1.04154	0.944658	1.80056	0.542893	0.890938	0.588397	1.39503	3.14765	1.52425	1.49812	0.776525	2.71838	4.1965	0.764433	1.25238	1.07769	0.902728	1.75431	0.684198	1.2869	1.17729	0.583414	2.18453	0.62343	1.31501	1.84035	1.48833	1.04053	1.66138	0.878442	0.57471	1.1025
Cp1067	Positive	156.114	7.29	0.528621	0.551909	0.287738	0.18073	0.148498	0.164321	1.5515	0.267042	0.596347	2.06891	0.806864	2.03422	1.31003	1.60397	0.321269	0.703947	0.245678	NA	0.0810847	0.0910107	0.84843	2.46961	1.64147	1.13685	1.40546	0.980468	2.39637	0.912374	1.84769	0.646888	1.72504	2.0442	0.418216	0.174165	1.83046	0.270294	0.808651	1.65023	0.837243	1.62041	1.41498	2.04753	2.67605	0.784899	0.122807	0.589146
Cp1152	Positive	157.146	3.5	1.24885	0.728646	0.937617	0.532234	0.533865	0.523059	1.64126	0.592626	1.21074	1.23517	1.21192	1.54435	1.30745	1.41731	0.952551	1.1475	0.689777	0.58941	0.652938	0.51837	1.69022	1.93595	1.71489	1.67707	1.45001	0.988112	2.1648	0.448091	1.5651	0.608955	1.42136	1.48795	0.342165	1.1013	1.64027	0.864114	1.46074	1.54398	1.24532	1.50981	2.49873	1.97297	2.0907	1.28497	0.794848	0.883528
Cp1020	Positive	158.085	2.81	0.900915	NA	1.35456	NA	1.52959	1.89056	2.5073	1.16411	1.4635	1.78214	1.14878	1.76517	1.30405	1.27687	NA	0.660512	1.47776	1.17228	0.840952	1.45861	2.97533	2.19416	1.8538	2.22471	1.48023	2.6933	1.89063	NA	0.798597	1.16169	1.16007	1.11562	0.65517	1.22551	1.44667	0.550328	NA	1.72837	1.36348	1.18055	1.39423	1.19035	1.11423	1.49128	1.02831	0.84627
Cp909	Positive	158.13	9.44	1.46777	1.14378	1.28016	0.890375	0.836959	0.89362	2.21642	0.546673	1.00808	3.102	1.63469	2.81171	1.88349	2.33686	0.786136	1.2042	1.23424	0.885109	0.906984	0.575099	1.94936	2.61826	1.94005	1.6003	1.47242	1.17694	1.78437	1.29496	2.19617	0.687936	2.22691	2.33028	0.73792	1.36114	2.1203	0.698949	1.19197	2.34624	1.90964	2.26041	3.27781	2.08761	2.40164	1.54733	0.603975	0.992253
Cp1033	Positive	159.979	5.9	0.416579	0.379566	0.629132	0.115472	0.231841	0.486513	1.66206	NA	0.518346	1.38632	0.819218	1.89012	2.30472	1.57779	0.586103	0.952361	0.243677	0.158485	NA	NA	3.10612	3.34395	2.92529	1.31957	1.28353	0.495129	2.03466	0.679349	1.35219	0.222448	1.58657	1.57692	NA	1.72443	2.67447	NA	1.36575	1.60591	1.33676	2.72275	1.86492	1.34085	2.08094	1.80156	NA	1.47916
Cp766	Positive	160.051	3.65	1.38451	1.84263	0.750323	1.14709	1.00953	1.77569	1.43525	1.9612	0.235191	0.597408	0.619935	0.412715	0.652296	2.08669	1.40555	0.641576	1.76777	0.47604	1.12979	0.791402	1.41319	4.8406	0.554436	1.01578	0.585944	1.87484	1.4083	0.419533	0.801648	1.16914	1.20817	2.25097	0.438575	1.11796	0.774165	1.0086	1.21292	0.737862	0.600782	1.99833	0.95281	0.812607	0.830758	1.44593	0.723516	0.379963
Cp1266	Positive	160.088	8.99	0.569659	0.44507	0.355702	0.219331	0.414681	0.575324	0.440056	0.277308	0.469076	0.57435	0.380471	0.911803	0.218836	0.842143	0.489662	0.516834	1.32922	0.588709	0.430132	0.11358	0.511091	0.618669	0.133048	0.248927	0.446167	0.262987	0.554426	0.355646	0.322611	0.193186	0.262383	0.87906	0.108757	0.507252	0.557197	0.82916	0.526374	0.870826	0.418425	0.537168	1.33905	0.239243	0.75365	0.899019	0.530944	0.328843
Cp136	Positive	162.053	3.57	8.01877	8.77959	5.14967	2.49593	7.3959	6.87178	16.2207	7.77001	10.8204	12.6051	11.8031	4.72765	3.46156	17.8387	23.0062	5.21434	13.2679	3.47346	9.60392	13.9595	14.0468	16.5583	7.19402	14.6721	10.8347	12.921	8.56933	2.34467	2.17128	10.0221	6.412	7.90446	6.74899	7.13809	12.7535	9.6292	9.74781	20.6654	3.34138	16.3934	11.6379	15.3059	16.5942	18.1903	6.88215	3.04148
Cp401	Positive	162.053	3.96	1.31425	1.86693	1.22206	1.21224	0.730507	1.33553	3.01168	1.91085	1.03016	1.58727	1.59888	1.47259	1.55646	3.58933	4.02469	1.33429	5.62982	0.756193	3.4598	4.10524	3.58563	4.55865	2.4414	3.39688	3.56204	6.39765	3.90704	0.887938	1.27654	1.40974	1.73151	3.32035	1.80605	1.89479	1.62802	2.20371	2.84873	3.95385	1.27034	3.93683	2.87629	3.02891	3.47334	4.28486	2.03219	1.77914
Cp13	Positive	162.053	6.09	10.1412	31.2821	25.4722	12.329	9.02135	23.5755	29.3882	5.1662	4.52312	30.6732	11.6622	9.17746	8.37478	22.7754	21.9939	19.9092	21.9117	14.2307	12.044	35.6198	33.4842	31.5716	27.4592	24.0079	29.7207	17.6267	29.7263	3.53821	3.20537	8.70948	8.26676	36.1461	20.7094	7.70645	20.4132	22.0147	30.1756	17.1364	33.4138	40.8654	59.2389	20.8704	63.8762	105.157	6.59329	12.4337
Cp367	Positive	162.053	6.56	1.01	0.752541	1.00644	0.511551	0.357122	0.859762	0.0817597	0.536773	0.338124	1.58343	0.638778	4.58639	4.01042	1.57439	6.19371	0.517048	1.24163	6.34466	1.30375	2.39275	4.36616	2.44507	3.31529	6.24364	1.31948	1.70908	2.02358	0.417766	0.341158	0.598117	5.5405	2.32171	4.36907	0.962989	6.56613	0.853575	2.05602	3.57951	4.16015	1.37474	2.25679	1.6124	2.56464	2.77679	3.60909	3.11168
Cp772	Positive	162.053	7.08	0.931176	1.63252	0.946774	0.879757	0.696699	0.66212	1.08315	1.01696	1.0304	3.21265	0.989301	1.65412	0.771501	3.3773	2.59145	1.22142	2.89796	0.899251	2.44546	1.78874	4.578	4.82192	2.00664	3.61075	2.37439	3.01945	2.62576	0.766641	0.760162	1.90422	1.27039	2.19683	1.10241	1.41054	0.937207	0.480953	2.84209	2.40508	2.21868	1.82663	3.33588	2.41451	1.00422	2.44892	0.956979	1.31054
Cp1681	Positive	162.066	4.9	0.80762	0.726861	0.16526	0.371192	1.07565	0.897114	1.35297	0.353938	0.631133	NA	0.850414	0.473701	0.453712	0.597144	1.29694	0.188932	1.41619	NA	0.603094	0.305483	0.822272	1.0404	0.554982	0.641998	0.539438	1.22857	1.35041	NA	0.315534	NA	0.519726	0.39355	0.427805	0.674925	0.607713	0.796207	0.605877	0.39503	0.294103	0.690907	0.791944	0.751672	0.462229	0.298635	0.336151	0.271239
Cp640	Positive	162.067	3.38	2.08467	1.2638	1.20275	1.53333	2.37072	1.26338	2.22159	1.18537	0.842817	0.913965	1.00852	1.01874	1.62714	1.88387	2.38533	0.961347	1.91109	0.593618	1.40954	1.2883	2.47834	2.82771	1.4271	1.28673	1.58262	5.32746	2.47533	0.86836	1.51325	1.6074	1.00713	1.76751	2.02593	2.25892	1.00528	1.45033	1.89993	1.05012	1.14183	2.17781	NA	1.23493	1.69456	0.97361	0.703527	0.709824
Cp1250	Positive	162.067	8	1.19807	1.06248	0.941337	0.649255	0.487112	0.651774	0.929193	0.449267	0.670549	1.45965	0.591983	1.01619	0.598606	0.730956	0.790547	0.395301	0.563859	0.783309	0.582219	0.67282	1.39747	1.49301	1.58812	0.98411	0.930632	0.918644	1.22682	0.423507	1.49824	0.402087	0.873916	1.06638	0.486518	1.12727	0.770124	1.20885	0.818778	1.45163	1.11405	0.823007	1.93345	0.25751	0.643077	0.821314	0.566741	1.02277
Cp282	Positive	162.068	8.25	1.3389	1.54339	1.65203	0.0145999	0.275919	0.174532	9.38183	0.674755	7.61551	9.92856	5.90673	13.0293	4.07838	7.56943	0.885315	4.22496	0.477041	0.591864	0.640867	NA	14.5149	15.0342	3.96156	6.60126	3.49847	0.188423	16.4107	3.62344	5.21974	0.301971	9.27323	5.51528	0.852325	0.787977	5.20509	0.600624	4.97576	8.64648	3.89238	5.12728	12.7369	3.60731	3.77815	3.20308	0.333277	1.16875
Cp373	Positive	162.125	6.09	3.73696	4.35581	5.91759	1.72279	2.65231	5.34425	7.83743	1.97098	2.15364	7.81482	4.04281	4.80778	5.04153	6.34363	5.91686	5.34807	5.73696	3.63756	3.11814	6.26595	2.50138	9.73075	8.77832	6.64453	6.55585	4.35544	9.31601	2.41577	4.02508	2.90646	3.71006	8.60749	4.27634	4.39802	6.58937	5.01178	6.05167	5.34664	6.94109	9.9683	11.9688	6.08835	10.943	11.7207	2.73755	5.06808
Cp200	Positive	162.125	5	3.3905	9.28481	5.31106	4.69609	1.84242	9.22642	8.16551	2.76013	1.89482	5.21303	1.12295	2.7381	2.06563	6.0175	5.58601	4.8475	5.75019	3.04721	2.89434	5.59899	4.27549	11.3734	3.42991	4.54611	5.0114	5.7499	5.24122	1.00835	2.07123	2.49638	2.58286	11.5826	3.82134	2.19344	2.78586	3.22525	5.39259	2.60043	6.44891	7.45459	6.19511	3.13442	6.49533	19.2557	2.14089	1.63748
Cp30	Positive	162.125	5.91	22.6216	17.4603	19.7923	9.10207	12.1838	15.7159	61.6657	11.7477	21.3183	46.3643	26.2911	61.8354	77.4945	56.283	21.6425	34.4608	14.6917	12.9055	11.0964	8.52621	107.712	100.419	89.6625	45.1867	35.3346	17.5004	69.0035	26.3107	42.4501	12.9356	53.2792	53.7898	11.2909	42.6846	82.8854	15.662	45.1489	50.4074	36.2795	91.7393	63.1453	46.7147	76.9999	52.5648	13.6411	45.925
Cp1813	Positive	163.033	5.24	NA	1.81901	2.39806	1.53532	1.43448	1.74331	NA	1.94079	1.99989	3.28374	1.66876	1.61711	1.82898	2.32797	NA	1.2103	2.31593	1.62213	1.88724	2.07775	NA	NA	NA	0.76998	1.61871	1.47868	NA	0.687592	0.470495	1.36043	1.32681	2.84409	1.49489	2.36083	1.29474	2.2903	NA	1.84079	2.52771	1.68208	2.11008	1.433	NA	NA	2.62559	NA
Cp1595	Positive	164.041	5.65	0.578811	1.10629	0.619116	0.652794	0.491819	0.414631	0.323551	0.392314	0.735372	0.833585	1.17835	0.969243	0.828588	0.0945411	0.308796	0.170851	0.78106	0.461664	0.726496	0.869481	0.370138	0.609329	NA	0.275775	0.364489	0.400985	0.515727	0.308099	0.128361	0.595679	0.590827	1.35614	1.13486	0.176564	0.379505	0.500431	NA	1.12857	0.851392	0.636314	0.685611	0.65652	NA	0.79803	0.882119	0.303792
Cp1852	Positive	164.042	5.58	NA	0.690882	0.49721	0.366436	NA	NA	NA	NA	0.447706	0.803962	0.852161	0.709416	0.665888	0.545106	NA	0.383426	0.346967	0.375759	0.652654	0.602061	NA	0.538882	NA	0.304708	0.396535	NA	NA	0.422919	NA	0.493667	0.448297	0.948166	0.495975	0.650649	NA	NA	NA	0.703116	0.579167	0.525429	0.617243	0.446586	NA	0.518076	0.616778	NA
Cp378	Positive	164.046	4.85	7.64486	3.25117	0.599085	2.46739	0.430943	0.344496	1.56506	1.38996	2.56205	6.1976	2.60278	3.44539	3.17979	2.87567	1.53059	2.17261	2.44139	1.19705	1.35402	1.05101	3.28502	10.9985	7.03968	2.42906	2.41555	0.935005	6.65451	0.782686	8.86815	0.997765	2.21924	2.76002	0.527236	3.54808	2.08785	2.60248	5.28306	2.38006	5.41542	4.04913	3.97468	2.43741	2.25732	2.68379	0.392198	7.57357
Cp1517	Positive	164.047	3.7	0.695577	0.684153	0.636	0.627023	0.587679	0.886902	1.28968	1.03872	NA	0.857603	NA	0.75239	0.322002	1.15712	0.785679	0.229799	0.83509	0.467507	0.642287	0.863869	0.820917	1.46198	0.616525	1.0352	0.923597	1.33612	0.876969	0.276303	NA	0.465488	0.571655	0.669021	0.440677	0.40281	0.570078	0.443197	0.4414	NA	0.528075	0.703354	1.28468	NA	0.837869	0.827947	NA	NA
Cp1702	Positive	164.083	11.07	0.834782	0.323263	0.53527	0.308037	0.290042	0.353901	0.738679	0.383759	0.166925	0.426399	0.0416784	0.411864	0.659636	0.585347	0.699278	0.467729	0.294629	0.376227	0.530246	0.1575	0.618025	0.957133	0.795696	0.645386	0.229662	0.288468	0.685815	0.096419	0.43389	0.218519	0.45739	0.487958	0.122943	0.344943	0.542294	0.0855176	0.338616	0.583896	0.183405	0.368012	0.618852	0.653793	0.932825	0.664822	0.439753	0.345375
Cp1637	Positive	165.029	9.07	0.619849	NA	0.473029	NA	0.230664	0.29653	0.831546	NA	0.653572	NA	0.72775	0.792243	NA	0.777984	0.778986	0.528709	0.483968	NA	NA	0.374046	0.781206	0.926421	0.798699	1.11496	0.815736	0.505723	1.14474	NA	0.592878	NA	0.627966	0.600323	NA	0.661658	0.661387	NA	NA	0.937385	0.587682	0.751158	0.966966	1.03263	0.814723	0.886971	0.488223	0.825033
Cp27	Positive	165.079	1.54	41.413	26.405	19.9332	20.4226	34.7225	30.7648	68.0239	25.5396	53.2791	43.4572	37.0177	36.2856	39.6723	31.205	31.4133	13.456	42.1475	28.6687	19.9534	24.1295	70.9326	55.334	55.7505	49.1137	29.3554	48.3566	42.3177	11.6985	25.5612	25.2132	23.8581	17.6462	23.4108	38.1858	30.9465	25.6483	31.4112	30.5135	42.3963	30.2694	41.8247	26.632	25.2291	32.1088	19.0873	47.4245
Cp500	Positive	166.026	3.85	2.23789	2.539	1.97325	1.25792	1.34269	1.64966	6.69022	1.48566	1.58306	3.36668	1.92794	4.42456	2.14528	3.73445	3.98909	1.48503	2.03824	1.5935	1.33342	1.62855	3.01694	4.71237	2.81298	3.53047	2.337	1.85097	3.6157	0.76988	2.13333	1.65441	3.08735	3.76954	1.05592	2.6503	3.40418	1.75344	2.25333	6.16234	2.52365	2.9639	3.69429	2.33872	4.62578	2.6134	1.98451	3.02406
Cp829	Positive	166.026	3.55	2.64872	2.77039	1.38189	0.851663	1.8329	1.64885	3.64599	2.14954	2.33849	3.69669	1.60162	0.728421	0.39608	2.16911	1.23457	0.418517	1.69296	0.267531	1.33158	2.82279	2.05968	3.43213	1.45562	1.64592	2.35706	1.86022	2.08694	0.476501	0.346771	0.933009	0.512167	1.24146	1.4606	1.62761	2.62294	1.48342	2.29698	2.39597	0.814711	4.56268	2.20338	2.95407	3.74217	3.49035	1.11336	0.639757
Cp310	Positive	166.026	8.36	2.82527	3.61329	2.47103	0.614857	1.64385	1.91072	7.374	2.43895	1.17999	4.66413	2.35371	8.78488	2.4685	8.04294	14.5721	1.80919	1.78378	1.77302	1.61658	2.59258	3.222	6.21313	2.68607	8.04139	2.28685	1.85472	5.08658	0.705404	2.56869	1.25638	3.84295	4.93291	2.34156	2.48333	5.5481	1.77292	2.71254	7.36488	2.08702	3.96172	3.19834	3.86646	8.6241	2.83311	2.44595	7.46472
Cp1224	Positive	166.027	10.03	NA	NA	NA	NA	NA	NA	NA	NA	NA	NA	NA	NA	NA	NA	NA	NA	NA	NA	NA	NA	NA	NA	NA	NA	1.20263	NA	NA	NA	NA	NA	NA	NA	NA	NA	NA	NA	NA	NA	NA	NA	NA	NA	NA	NA	NA	NA
Cp151	Positive	166.048	5.73	10.93	11.4659	6.35471	3.8222	2.52842	6.07812	16.3102	5.04765	12.0539	14.5813	12.7084	11.4197	11.1994	12.6389	18.6502	8.82907	6.44043	3.69658	6.09939	3.5898	19.3334	11.3284	12.147	18.4501	9.34696	7.05679	16.6471	4.35446	9.54388	5.85897	11.5268	13.0462	5.04355	10.312	9.3405	4.96562	11	10.8922	6.72624	12.4994	14.6095	23.1441	13.6729	10.4173	4.8676	11.1011
Cp1853	Positive	166.05	11.44	0.603907	0.500549	0.263128	NA	NA	NA	NA	NA	0.337174	0.447055	0.23285	NA	NA	0.244999	0.384549	0.157693	NA	0.146914	NA	NA	0.454032	0.318517	0.295026	0.439337	NA	0.115333	0.296484	0.173849	0.560177	0.236944	0.0903824	0.237245	NA	0.487352	0.155338	0.217863	NA	0.194581	0.189562	NA	0.419539	NA	0.104158	NA	0.177025	0.905528
Cp1325	Positive	166.135	9.39	1.48593	1.64392	1.84547	1.36675	0.939346	0.966443	1.22368	1.21397	1.15577	0.549051	0.98693	0.765438	1.6792	1.85155	0.758907	1.0096	1.27088	1.39387	1.70335	1.45056	1.27766	1.96097	1.87414	1.3893	0.940141	1.88127	1.65735	1.43878	1.11035	1.7571	1.54428	0.743024	1.549	0.955085	0.620595	1.114	0.608438	2.24123	1.44602	1.67317	1.56571	1.5666	1.04075	1.38772	1.3433	1.93695
Cp159	Positive	167.035	4.41	3.08109	2.62016	1.38689	2.73981	2.88576	3.67283	4.80961	3.85702	2.69086	7.40779	3.85138	3.16075	2.1624	9.75276	5.43282	3.9819	10.4818	4.60366	9.1772	7.62647	6.24504	10.404	5.36191	5.28495	13.8631	11.9961	11.5336	2.53103	3.26943	3.44795	3.00475	7.76081	4.91562	4.78192	2.35533	4.54644	6.1853	3.96358	4.13722	7.80393	8.42971	5.39066	6.17449	6.89622	3.3768	3.13635
Cp1460	Positive	168.113	8.48	0.291546	0.301154	0.121047	NA	0.0772446	NA	0.595438	0.118061	0.384426	1.40826	0.395571	1.68107	0.990609	0.868485	0.146031	0.558878	0.201499	NA	NA	NA	0.527219	1.35306	1.00366	0.616193	0.422458	0.167636	0.738558	NA	0.675239	0.0119217	0.591484	0.589033	0.117164	0.0786142	0.972947	0.17864	0.456765	1.12301	0.463228	0.97222	0.747223	1.10829	1.47035	0.686482	0.132213	NA
Cp562	Positive	169.048	9.52	2.4264	2.40689	4.08657	2.15371	1.73244	1.80874	2.8882	2.37918	1.51135	4.18826	1.56406	3.11848	0.713325	1.88113	4.77097	1.6148	3.91808	2.23796	2.60848	2.68079	2.28927	2.98934	2.86866	0.987498	1.07836	6.47463	1.78905	0.534794	1.10352	2.32216	2.6866	2.34239	2.09686	4.72278	1.55048	5.43644	1.55444	1.25458	1.64147	1.20262	1.73655	1.89049	3.65628	1.16178	3.231	3.02266
Cp165	Positive	170.021	10.57	15.3409	10.3439	2.41151	2.55775	2.2065	1.05485	8.75332	5.53505	4.02947	11.2146	3.79498	6.64358	3.11387	4.39818	4.64684	4.12632	6.38009	3.4398	6.36976	7.15397	17.92	36.3283	7.82214	7.75832	13.097	2.90265	19.2	2.44521	2.98904	2.65637	4.11267	18.3354	2.90229	1.77919	8.97754	3.37721	16.3787	8.37515	9.98247	24.1453	18.2031	9.15679	20.0991	19.4998	3.68159	3.65352
Cp270	Positive	170.021	10.57	15.3876	10.4257	2.39219	2.55853	2.2065	1.02489	8.81248	5.48763	4.03101	11.2262	3.79498	6.64358	3.11387	4.39818	4.64684	4.09723	6.38009	3.43513	6.36707	7.15239	17.9016	36.3402	7.78134	7.68599	13.0133	2.90265	19.2989	2.44521	2.98659	2.67425	4.11629	18.0252	2.90229	1.77806	8.92702	3.37174	16.3323	8.2703	9.99033	24.1464	17.985	9.22004	20.0838	19.4505	3.66592	3.65365
Cp1599	Positive	170.021	10.04	0.794629	NA	NA	NA	NA	NA	0.265816	NA	NA	0.488846	NA	0.279824	NA	NA	NA	NA	NA	NA	NA	NA	0.933002	1.54778	0.30526	NA	0.487201	NA	0.898972	NA	NA	NA	NA	0.904226	NA	NA	0.221641	NA	0.780714	NA	0.458381	1.18862	0.662929	NA	0.696202	0.750514	NA	NA
Cp1013	Positive	170.057	1.94	2.16645	2.62703	1.96724	2.22063	1.46273	2.46925	3.95753	1.84717	0.989203	1.91183	0.530713	1.30353	0.668063	2.12111	1.434	0.913098	1.77747	0.696352	0.648962	1.06675	1.91601	3.34949	1.8972	1.29416	1.30202	2.58427	1.43811	1.34589	0.912926	0.546773	1.55096	1.75173	0.777982	0.982184	1.55414	0.755383	1.46237	0.998693	0.846152	1.20191	2.15979	1.5516	1.78938	1.29147	0.972396	0.611781
Cp113	Positive	171.125	5.01	6.64755	7.33439	7.60267	11.8836	17.3547	15.8113	2.23192	11.1083	1.65132	1.34885	1.24673	8.2787	2.29928	3.17674	NA	6.99378	38.8646	19.6572	21.6711	4.52686	3.81848	5.82195	2.05904	0.0314091	0.139907	3.51271	0.280412	28.3696	0.77761	6.49069	0.489051	NA	8.21156	5.07732	3.77194	24.5036	2.43841	12.0464	NA	2.75684	7.65031	1.0284	0.146826	3.31274	7.37024	6.16473
Cp1815	Positive	171.162	8.75	1.76212	1.67015	1.40922	0.923225	0.980536	1.02999	NA	NA	NA	2.00822	1.12644	1.75085	1.39117	1.93737	1.39719	NA	1.43389	NA	1.1011	NA	2.11606	2.27964	2.48261	1.78602	1.71771	1.63492	2.14982	0.672872	1.78681	0.703245	1.87437	1.73649	NA	1.51766	1.24864	1.40697	1.46132	1.83616	1.64698	1.87047	2.63129	1.51766	2.1943	NA	1.01655	1.40935
Cp1267	Positive	172.073	4.76	0.917891	0.0148311	0.746459	0.321088	0.411579	0.557992	0.963034	0.459166	0.204916	1.34341	0.578756	0.835784	0.281497	1.065	1.05432	0.529565	0.428859	0.689574	1.23587	0.859721	1.64495	2.72006	0.431895	1.32401	1.27506	1.14019	1.75503	0.472674	0.426935	0.663145	0.812237	0.941908	0.724523	0.839775	0.93506	0.620369	0.819942	1.03761	0.810388	0.892168	0.76524	1.08811	0.99571	2.10046	0.140313	0.55087
Cp98	Positive	172.1	4.44	6.21355	8.27492	11.0173	7.82844	5.93104	7.86872	23.1268	9.4049	19.2974	27.3978	15.9792	23.5299	7.81844	21.3543	21.0865	11.6598	12.4152	8.77909	8.96703	7.31562	36.3932	31.6568	27.9841	12.7764	17.2659	15.9852	24.0268	5.41639	17.3487	9.86412	21.5307	20.9304	7.49019	16.9121	13.441	14.6702	22.2116	14.9129	12.4111	14.9983	18.8701	29.5443	35.1537	12.0414	9.26043	12.0086
Cp534	Positive	172.1	4.36	3.34193	2.15916	1.99886	1.88372	1.48519	2.04494	5.71168	1.44044	3.58426	3.67812	2.94981	4.89982	1.85413	4.06591	5.18199	3.31037	2.27406	1.84607	2.44887	1.72408	7.52961	6.81787	4.90764	2.98843	2.74526	4.40493	4.7837	NA	2.81065	2.07519	4.74458	3.41952	1.49187	3.0939	3.93789	3.22032	3.94024	3.06526	3.29212	3.34959	3.31738	5.28706	7.19948	4.41008	2.07766	3.28983
Cp822	Positive	172.11	7.75	1.30716	0.885059	0.709258	0.349846	0.534079	0.571159	2.20596	NA	0.836999	2.38178	1.27007	2.95411	1.72405	1.62708	1.19685	0.884533	0.389914	0.505376	0.589746	0.224355	1.75202	2.77436	2.5507	1.99872	0.740181	0.324677	1.27738	0.15692	1.08509	0.912688	1.29537	1.47911	0.310116	0.574575	2.25872	0.428121	1.38263	2.45743	1.15047	2.18347	1.89951	2.85292	3.47306	1.69651	0.536692	0.951688
Cp832	Positive	172.144	9.92	0.598592	0.629772	0.452569	0.345643	0.267681	0.297336	1.30828	0.0986284	0.709016	1.56309	0.417034	1.30651	0.856453	1.41262	0.978258	0.617718	1.02658	0.299205	0.318375	0.224111	1.3293	1.6225	1.03396	1.01161	0.55012	0.575192	1.28971	0.546423	1.09742	0.265529	1.41468	1.28853	0.50819	0.623409	1.08345	0.451068	0.942397	1.54336	1.29196	1.64955	1.6167	1.26519	1.82633	0.99906	0.174543	0.573759
Cp1151	Positive	176.047	9.05	1.30716	1.40044	1.40564	0.595058	0.498238	0.597493	1.56196	0.572216	1.02351	2.08172	1.20393	1.94629	1.18579	1.02234	1.31474	0.797984	1.04983	0.798386	1.05652	0.569976	1.87617	2.07273	1.70452	1.012	1.52035	1.81878	1.95898	0.515216	1.15537	0.646617	1.36965	1.5625	0.741992	1.60799	1.27971	1.12814	0.899678	1.14494	0.633009	1.0609	2.04348	1.9104	1.81699	1.3046	0.880944	1.45513
Cp628	Positive	176.12	7.45	4.65795	2.9334	3.27529	1.84501	1.36087	1.67451	4.33675	1.86539	3.71236	4.46495	3.33614	4.22714	3.75638	4.29314	3.86649	2.74475	1.9782	1.73036	2.18403	1.76483	5.33752	5.40987	5.20853	4.62171	3.91089	3.51566	5.75102	1.33308	4.10512	1.97684	3.7954	3.98542	1.58854	3.41429	3.7636	2.71335	4.06036	3.97933	3.456	4.20584	4.96015	5.33872	5.2418	3.93519	1.85138	3.21888
Cp1131	Positive	178.057	3.97	1.47116	1.93271	1.78581	1.18459	1.1638	1.22589	0.691405	1.48823	1.66248	2.01255	1.49069	1.3899	1.59588	1.80953	1.3336	1.1338	2.01622	1.45757	1.56092	1.55828	1.76679	1.36905	0.370625	0.75421	1.42513	1.27685	1.7814	NA	0.602883	1.37845	1.17486	2.43898	1.33214	1.6708	1.05466	1.78079	0.119895	1.33164	1.80104	1.57275	1.54431	1.39497	0.728691	1.68283	2.26435	0.092066
Cp1297	Positive	178.098	6.84	0.857662	1.5033	0.514809	0.152636	0.697662	2.92311	0.597375	0.488009	0.297521	0.964723	0.613072	0.494549	NA	0.173729	NA	0.766317	0.361436	NA	NA	0.440535	1.1058	NA	0.559485	0.286331	1.28496	0.497945	0.142312	NA	NA	0.136287	NA	2.70669	0.389713	0.740413	NA	0.446799	0.516596	0.201839	0.297378	0.782274	0.46442	0.756988	0.617003	1.1607	0.223273	NA
Cp1824	Positive	179.093	3.34	1.69569	1.06097	NA	0.765501	NA	NA	NA	1.06829	NA	NA	0.425145	0.55596	0.763345	1.06726	NA	0.590759	1.05599	NA	0.605366	0.669404	1.42119	3.87808	0.969137	0.780015	0.682733	NA	1.26427	NA	0.571891	NA	NA	1.30648	NA	NA	0.693591	0.820622	1.43106	NA	NA	NA	NA	NA	0.79799	1.58834	NA	0.821854
Cp719	Positive	180.078	8.16	0.0749901	NA	0.498641	NA	0.00599127	NA	1.87608	0.0382537	3.71461	2.60739	2.07344	2.55103	1.40218	2.15974	NA	1.06287	NA	0.0513089	NA	NA	3.47639	3.00612	0.955354	2.22093	0.577346	NA	3.76785	0.608838	0.7443	NA	1.83569	0.863688	0.163924	0.130694	1.01096	NA	1.34888	1.8445	0.781567	0.884531	2.43825	1.03822	0.671383	0.81441	0.00378872	0.414678
Cp1727	Positive	182.056	5.16	0.763187	NA	0.266562	0.255831	0.158876	NA	0.413061	0.301385	NA	0.305829	NA	NA	NA	0.304632	0.113022	NA	0.198113	0.219962	NA	0.130904	0.442783	0.485374	0.362983	0.25388	0.174168	0.243139	0.600927	NA	0.300526	NA	NA	0.340496	NA	0.410996	NA	0.168767	0.394489	0.0566755	0.144759	NA	0.434982	0.374336	0.324188	0.220524	NA	0.383396
Cp1191	Positive	182.057	8.99	0.742225	0.67866	0.396481	0.431583	0.648769	0.859627	0.907106	0.405391	0.673755	0.651208	0.313087	1.20326	0.296177	1.04496	0.625349	0.627026	1.61754	0.752103	0.690285	0.218621	0.602439	0.853124	0.119129	0.381341	0.685208	0.40769	0.347823	0.45972	0.395089	0.306577	0.392314	0.894976	0.302103	0.700471	0.507312	1.1699	0.66757	1.13567	0.694974	0.637586	1.41868	0.411552	0.757554	0.889543	0.668253	0.372587
Cp1140	Positive	182.095	11.08	2.08127	0.424471	0.509802	0.173208	0.360118	0.335763	0.935005	1.767	2.50886	0.596127	0.484543	2.84164	2.56514	0.861859	2.98756	0.401934	0.696704	1.82538	0.363248	0.279742	0.791642	0.810856	0.597966	2.9376	3.12929	1.83836	3.99333	2.82221	3.18463	1.99174	2.557	2.39789	0.257051	3.48217	0.640296	2.51536	0.692131	3.90211	2.47361	2.76646	0.748993	3.27633	1.19078	2.50672	1.61713	1.61751
Cp1547	Positive	182.128	9.02	0.297599	0.347432	0.248104	NA	0.127849	0.275301	0.53964	NA	0.285648	1.2238	0.420403	1.67625	0.497343	0.809983	0.264073	0.441304	0.254606	0.256077	0.221669	NA	0.371628	1.1289	0.901453	0.50815	0.315769	0.222084	0.595465	0.376991	0.441577	0.2257	0.512167	0.639774	0.239318	0.254332	0.96297	0.205589	0.396468	1.30215	0.442923	0.870529	0.661481	0.931342	1.3885	0.609454	0.209556	0.346646
Cp169	Positive	183.162	1.76	16.1896	10.7747	10.0074	7.13616	5.70615	6.22713	17.6631	7.72724	7.80273	16.2708	10.2593	16.5981	13.8986	15.1392	14.0014	10.5987	6.95904	6.86359	6.96633	5.64717	21.8594	22.2175	17.7488	15.4074	12.0817	13.0547	22.8903	4.93017	17.7428	6.52036	15.8106	17.4045	5.53585	12.8247	12.7485	10.2229	15.5796	13.1194	13.3248	16.1555	21.9502	17.6632	20.0034	16.1279	6.35291	14.2124
Cp503	Positive	183.162	3.05	4.08548	2.99643	2.76206	1.77799	1.66932	1.73135	4.89874	2.06252	3.37661	4.97317	4.06527	4.88933	3.56962	4.85149	3.9287	3.50754	1.90616	1.6683	1.7833	1.5678	6.80302	6.09836	5.82901	5.07838	3.3854	3.46469	6.49332	1.65796	4.93715	1.76793	4.48987	4.79891	1.60929	3.15106	3.58894	2.69801	4.80383	4.44308	3.59985	4.40229	6.3555	6.29869	6.48208	4.48386	2.10392	3.51415
Cp1169	Positive	183.162	4.56	1.64978	1.20022	1.29432	0.775788	0.81492	0.7731	1.93278	0.94412	1.6518	1.73058	1.65029	1.84077	1.8525	2.08249	1.70111	1.44748	1.10709	0.799905	1.09841	0.893759	2.45841	2.38349	1.81259	2.22614	1.75249	1.75468	2.32787	0.567473	1.81023	0.912823	1.43199	1.79512	0.873604	1.69042	1.2715	1.3444	1.9714	1.72497	1.22986	1.53357	2.3887	2.63194	2.30571	1.64331	1.14746	1.30164
Cp258	Positive	184.036	3.6	NA	0.684977	1.60266	0.374289	2.80873	2.57351	2.68464	1.38495	3.76567	0.743597	7.66558	NA	0.516509	8.87248	17.4212	2.85879	4.96467	0.616876	1.93879	2.34481	NA	NA	0.478428	6.91496	2.23774	6.05715	NA	1.14996	NA	6.72519	1.94689	0.497209	2.77751	0.953109	2.98818	4.46025	NA	10.3745	NA	NA	1.82406	2.55206	1.67839	NA	2.83998	NA
Cp933	Positive	184.073	3.84	1.38082	0.747048	0.936043	0.758312	1.02975	0.889724	1.59955	1.03407	0.991814	2.10974	0.941508	1.27261	0.457382	2.0277	1.10619	0.711007	1.55873	0.74509	1.10366	1.46154	2.10901	1.97474	2.48602	1.87907	3.64346	1.98119	1.80403	0.324586	1.00456	0.850776	1.49805	2.25383	0.931266	0.556651	1.25837	0.516307	1.76246	0.696012	0.7441	0.954824	2.94401	2.19476	1.50005	1.21566	0.889044	NA
Cp915	Positive	184.073	9.65	2.71072	1.17509	NA	NA	0.196428	NA	0.795898	0.488742	0.308206	1.29265	0.249571	0.871241	0.355983	NA	NA	NA	0.355741	0.356124	0.312836	0.42797	2.26379	3.97418	0.87034	0.8573	0.688074	NA	2.73827	NA	0.332251	NA	0.287799	2.09617	NA	NA	0.477633	0.355545	1.8068	0.559805	0.94388	2.95061	1.54078	0.530151	1.5423	1.48871	0.401866	0.526836
Cp609	Positive	184.073	11.25	2.13471	2.98888	0.440693	0.626138	2.46798	2.0792	3.91374	2.22079	1.86835	6.2394	3.51322	1.67979	0.865424	2.07845	1.51857	1.89884	4.34355	0.914795	2.64541	3.75352	3.93788	7.20636	4.25345	2.26068	2.36423	2.12643	2.56927	0.405548	2.73048	1.27115	1.15876	3.00597	1.43066	1.25261	2.28297	2.43825	3.25544	4.00743	2.82745	2.97309	5.32499	3.34599	4.87174	4.40561	0.658062	1.02506
Cp1785	Positive	184.074	10.77	0.471493	0.383274	0.0387753	0.0443529	0.226384	NA	0.360233	0.205323	0.239465	0.619344	0.365622	0.163526	NA	NA	0.167328	0.183475	0.82139	0.228494	0.453563	0.620239	0.468805	0.7393	0.68148	0.230942	0.258842	0.302683	0.156513	NA	0.39094	NA	NA	0.320907	NA	NA	0.186911	0.351142	0.465379	0.373873	0.334059	0.472108	0.654725	0.463626	0.512008	0.565593	0.0539567	0.283828
Cp1400	Positive	185.016	5.72	0.496736	0.888218	NA	NA	0.0866594	NA	0.834646	NA	0.830113	1.06576	0.980815	0.687859	0.726374	0.783156	1.11379	0.388668	0.188723	NA	NA	NA	0.950756	NA	0.717232	1.62441	0.549599	NA	0.964666	0.114084	0.622161	NA	0.628076	0.85811	0.158145	0.620022	0.55265	NA	NA	0.474715	0.208034	0.731216	1.04756	1.80311	0.749745	0.382567	NA	NA
Cp878	Positive	186.089	6.34	0.0975757	0.295935	0.0653885	0.791936	0.65904	0.927479	1.29679	0.0450978	0.30595	1.02109	1.04895	0.405908	0.384799	0.540096	NA	0.216854	NA	0.231299	0.0411814	NA	0.266862	2.00118	0.487298	0.771414	NA	0.153152	1.37069	0.458689	2.23034	NA	1.80097	2.39436	0.206481	0.547477	0.666312	0.502166	1.04891	0.441358	1.98248	1.52905	3.06241	0.532059	0.818906	0.509277	0.252538	0.114065
Cp1565	Positive	186.976	5.73	NA	0.92557	0.608385	0.359911	0.382585	0.356723	0.990674	NA	0.527369	0.999949	0.991547	0.82231	0.437673	0.85895	1.10969	0.467622	0.400997	0.320944	0.23445	0.170553	0.98369	1.08362	0.871432	1.17817	0.237348	0.871706	1.25647	0.576895	0.699032	0.195218	0.286485	0.661947	0.227891	0.735615	NA	0.58875	0.67374	0.777396	0.369823	1.14449	0.662929	0.917846	1.04507	0.814004	0.49972	0.916972
Cp6	Positive	187.063	2.81	69.1084	64.3312	104.65	55.5409	134.175	166.773	204.618	82.1626	110.891	137.31	78.2043	122.924	85.1577	94.4808	91.1119	46.6519	117.269	93.0016	70.8138	105.034	227.813	142.954	142.847	172.372	98.4247	216.909	132.267	22.6415	57.7391	86.425	95.2855	75.6795	57.6311	95.998	95.9254	53.2054	72.7074	133.277	118.942	69.1517	127.561	78.6884	94.8464	85.2519	74.1078	61.6637
Cp343	Positive	187.119	4.67	1.45138	0.877369	0.788382	3.26961	4.30644	5.67693	0.231459	3.46165	1.16254	0.324083	0.176322	2.10896	0.405595	0.61977	0.640256	1.83903	13.1758	5.45266	5.43963	0.692218	1.30449	0.940511	0.719415	0.653727	0.453201	1.07045	0.624178	5.99829	0.462198	1.10777	0.583268	0.807913	1.30535	1.86232	1.2566	6.68318	0.653369	2.08695	0.380958	0.551594	1.51198	0.378017	0.19772	1.28822	1.78188	1.02557
Cp396	Positive	187.12	1.36	5.55812	4.04971	3.94878	2.11655	2.79257	2.27872	6.52166	2.2687	3.10604	6.2149	4.85316	4.43477	5.16712	6.08231	5.88248	4.46182	2.49219	1.81767	1.9618	1.90268	9.73919	7.81236	6.28219	7.24587	4.25871	4.84816	8.69277	2.09133	4.88114	2.45208	5.28841	5.40209	1.72501	3.23306	5.2037	3.09971	6.15166	4.33683	3.95211	5.40944	7.06411	8.88115	7.42397	5.49321	2.18257	4.40467
Cp1724	Positive	188.013	8.01	0.552683	0.581846	0.48605	0.259591	0.35616	0.299754	0.57206	0.281219	0.182953	0.561221	0.417907	0.545607	0.500198	0.514239	0.662618	0.3248	0.330496	0.294296	NA	0.425164	0.695685	0.628801	0.694853	0.502025	0.596235	0.519537	0.630107	0.359768	0.722093	0.448419	0.575051	0.862327	0.289625	0.793905	0.625899	0.522311	0.381569	0.483981	0.708598	0.766433	0.664699	0.759851	0.906471	0.619878	NA	0.601862
Cp1588	Positive	188.013	8.25	NA	0.318045	0.29246	NA	NA	NA	1.06197	NA	0.427641	0.919409	0.542942	1.03477	NA	0.796569	NA	0.415735	NA	NA	NA	NA	1.03587	0.981037	NA	0.657637	NA	NA	1.38177	0.60663	0.605933	NA	0.824945	0.39423	NA	NA	0.486853	NA	0.671994	NA	0.268033	0.383712	1.05528	0.297042	0.558161	NA	NA	0.223171
Cp574	Positive	188.119	7.8	4.97267	4.13348	3.72271	2.30203	2.13867	2.10298	5.39136	2.23704	3.52038	4.58888	3.52594	4.8621	3.62671	4.79736	4.4926	3.12315	2.704	2.42987	2.85018	2.33566	6.35279	6.85412	5.64042	5.85813	4.30079	3.88942	6.58492	1.69212	4.61515	2.5358	4.55199	4.74137	1.97865	4.2144	4.64322	3.23419	5.06026	4.45883	4.23443	4.77454	5.45642	5.10002	5.30441	4.05418	2.4662	3.41305
Cp422	Positive	189.012	3.55	3.01097	2.99506	1.11833	0.565416	1.64032	0.81502	3.84103	2.00813	2.98518	4.49729	1.39286	0.449023	0.546548	2.47164	1.46807	0.426005	1.77439	0.545815	2.16898	3.3896	2.81351	4.7502	1.66017	2.29782	2.5143	1.71967	2.2756	0.48445	0.199985	1.07919	0.614381	1.9385	1.46428	1.44117	3.06483	1.3975	2.63548	2.50608	0.546416	5.32501	2.74389	3.62354	4.5845	4.41983	1.08384	0.674091
Cp320	Positive	189.012	6.09	2.3709	5.17674	4.50623	2.46219	2.21688	3.72026	4.20384	1.32128	1.13025	5.33952	2.84062	2.20086	2.064	3.99723	3.80184	3.24511	3.99304	3.05271	2.5487	4.94251	4.21572	5.20312	4.32959	4.25978	4.62307	3.39093	5.11794	1.03764	0.846306	1.95204	1.74882	5.02256	3.84985	2.09464	3.68252	4.02946	3.94838	3.31081	4.63844	5.53688	7.17431	3.20967	6.39773	7.29436	1.8276	2.73655
Cp1197	Positive	189.03	3.68	0.762449	1.546	1.14509	1.27307	0.910245	1.47848	1.42621	1.40487	0.700111	1.01084	0.479676	0.905137	0.999308	1.94949	1.78523	0.631198	1.48654	0.778049	1.31539	1.51912	1.79038	2.80428	1.10833	1.82786	1.45287	2.04744	1.81636	0.643431	0.761626	0.998036	1.11603	1.42538	0.941774	1.23906	1.07234	0.796741	1.30208	1.69718	0.856239	2.14415	1.78352	1.43968	1.46784	1.62313	0.870884	0.53294
Cp214	Positive	189.048	5	1.57671	4.81983	2.91687	2.28965	1.14283	5.38537	3.72168	1.33326	1.17607	2.39011	0.666355	1.40266	1.02078	2.67091	2.42351	2.81418	3.02372	1.60636	1.58861	2.89343	1.87115	5.42222	1.65034	2.42724	2.58334	2.75379	2.48189	0.69613	1.06972	1.4596	1.21375	5.89305	2.2994	1.14534	1.22806	1.82202	2.36181	1.44623	3.69404	3.70601	3.05662	1.64184	3.05601	10.5031	1.05732	0.816641
Cp792	Positive	190.157	7.88	1.8253	1.32697	0.160967	0.347302	0.792452	NA	2.71344	0.950842	NA	1.80247	0.228607	0.347333	0.16637	0.592296	NA	1.04618	1.11109	0.446703	0.0345071	NA	0.970408	2.55082	0.702767	0.601335	0.608089	1.3321	3.12151	0.659623	2.26133	0.188173	2.51603	0.55516	NA	1.48266	0.53156	NA	0.343388	0.336038	1.83274	1.57049	2.36779	2.2606	2.79736	0.539872	NA	0.707916
Cp1427	Positive	190.167	11.81	1.5215	1.41513	1.14752	1.00209	1.18306	1.75459	1.64734	1.47112	1.31237	2.28491	1.02312	1.3326	1.03084	0.939432	1.47948	0.853615	1.87291	NA	1.62453	1.25988	1.61256	1.83068	1.05756	1.5887	1.13906	1.45079	1.79545	NA	1.40782	1.27793	0.955095	1.54699	1.11213	1.31753	1.284	1.19925	1.44817	1.5619	1.28266	1.28012	1.73108	1.72691	1.62456	1.84352	NA	1.09182
Cp1236	Positive	190.171	9.55	6.96286	5.97514	7.13579	4.61358	4.73792	4.06261	5.71285	5.92247	2.0944	2.39876	4.44199	3.86917	4.84594	9.85878	NA	8.85068	5.42185	10.1296	6.569	NA	10.996	5.88812	11.1141	4.50663	NA	NA	2.83938	5.70476	NA	7.481	10.8947	NA	NA	NA	2.49716	NA	2.16055	9.72131	6.8262	NA	4.34966	3.93966	4.7673	13.8073	NA	5.91015
Cp577	Positive	190.171	9.56	6.90086	7.62071	8.36758	4.84165	4.73952	4.01007	6.24667	6.0365	1.12146	2.35841	4.44586	3.88888	3.93362	10.4411	1.73062	8.48427	5.24452	10.2617	5.7884	5.21445	10.9054	6.35608	10.7073	5.27895	6.13339	9.14325	3.05051	5.51281	6.02907	7.88566	10.7763	4.06636	7.26572	17.0905	2.63267	4.10431	2.19198	8.23385	6.79214	5.16123	4.38103	3.4256	4.88931	13.1039	4.51067	5.87137
Cp338	Positive	190.171	9.56	NA	6.46581	5.47346	4.2707	0.849904	NA	3.77606	1.85732	NA	2.17715	NA	NA	4.45842	NA	NA	5.80264	5.60611	9.89643	NA	2.53183	10.683	5.70354	3.32293	3.70485	6.13118	8.73985	3.01681	5.42846	5.90449	7.89596	10.632	4.13397	7.98617	20.3413	2.39385	1.75945	2.08477	8.89774	NA	4.11221	2.15175	NA	4.82252	12.3752	1.88221	3.69192
Cp307	Positive	190.172	9.38	25.6271	27.5493	36.6402	23.7791	16.9675	16.3153	19.5233	20.0505	17.7345	10.732	20.4584	16.1108	29.9892	28.5462	13.8173	16.2381	21.1896	26.0218	28.1808	24.0549	16.9109	35.1122	27.8828	21.3852	17.6916	32.7859	27.6091	22.996	17.8941	29.65	26.7865	14.819	29.5592	18.8619	11.0279	16.9433	11.68	32.3178	22.8631	27.7917	26.5971	29.4826	19.8317	21.3424	20.9047	30.8046
Cp1504	Positive	191.058	3.95	NA	0.685526	0.599657	NA	0.489144	0.779684	1.16633	0.6673	0.246113	NA	0.338543	NA	0.444605	1.36769	NA	NA	1.38802	0.59689	NA	1.1391	0.968918	NA	0.808387	1.13503	1.33081	1.42772	NA	0.345931	NA	NA	0.574832	0.969659	NA	0.632019	0.706599	NA	1.01783	NA	0.731786	NA	NA	0.945656	0.98079	1.51335	0.463531	0.48093
Cp1550	Positive	192.079	4.09	NA	NA	NA	NA	1.25945	1.64455	1.42027	1.39852	NA	NA	1.18384	1.25829	NA	0.864768	0.695627	0.36556	0.914828	NA	NA	0.859599	NA	NA	NA	1.17713	NA	NA	0.282908	NA	NA	1.38129	0.766881	NA	0.697596	NA	NA	NA	NA	1.02186	NA	0.117815	NA	NA	NA	NA	NA	NA
Cp142	Positive	193.007	5.73	3.2541	4.61041	1.55773	0.519293	0.289828	0.785999	7.14525	0.970641	5.16969	6.40224	6.28221	4.4803	4.31842	4.52359	7.9724	2.66612	1.03644	0.690041	0.942769	0.351233	9.00338	3.29503	5.23473	11.2765	3.3626	1.63398	7.39494	0.798437	3.54604	1.24948	4.76726	4.82082	1.08153	3.92549	3.02846	1.04809	3.78181	3.61472	1.73252	5.13888	5.75772	12.4811	5.35335	3.19361	1.13139	5.10445
Cp1788	Positive	193.09	8.58	22.3634	5.74224	10.8413	5.65936	5.07856	8.7039	NA	11.6481	12.2468	5.4942	11.1969	26.1941	18.889	5.81856	8.78729	10.2961	2.59856	4.45429	18.353	13.9953	2.74737	NA	NA	3.02792	2.60965	NA	6.05967	63.0892	15.247	24.5672	NA	9.41214	31.1199	7.50152	NA	11.5457	9.51337	20.7562	10.6177	15.9638	NA	4.19308	10.2898	7.16101	19.2787	40.219
Cp1858	Positive	193.11	9.39	NA	0.0611096	NA	NA	NA	0.022841	NA	0.0890956	0.567022	NA	NA	0.794087	NA	NA	NA	NA	NA	0.00818138	NA	NA	0.608538	0.535716	0.157065	NA	NA	NA	NA	0.0675669	0.0402654	NA	3.39509	NA	NA	NA	NA	NA	NA	NA	2.00855	1.34122	NA	NA	NA	NA	0.121631	NA
Cp607	Positive	194.006	5.73	1.00897	1.36734	0.64759	0.220879	0.179845	0.238487	1.95694	0.264842	1.40295	2.04137	1.89674	1.18978	1.21366	1.4144	2.171	0.796487	0.398996	0.222417	0.354586	0.130904	2.43497	0.972172	1.55168	2.9032	1.10115	0.560842	2.13453	0.204761	1.06838	0.368218	1.34664	1.3458	0.31931	1.21139	0.841226	0.355145	1.07673	1.07019	0.536197	1.44504	1.64775	3.29719	1.34221	1.00244	0.351567	1.39663
Cp1441	Positive	194.058	6.79	1.3699	0.928728	0.798255	0.505136	0.445815	0.491753	1.58598	0.689421	0.640987	1.41258	0.669849	1.58945	0.963832	1.12657	1.23564	0.783756	0.834629	0.584852	0.732602	0.632561	1.74836	1.32726	1.41672	0.973292	1.26946	1.2224	1.66016	0.346519	1.10437	0.566145	1.14835	1.31247	0.451053	0.999967	1.28501	0.966308	1.03959	1.02062	0.899208	1.31647	1.38023	1.37466	1.72677	1.06512	0.654927	1.15642
Cp547	Positive	194.112	1.94	3.03843	2.23991	2.45214	1.37715	2.87774	1.44678	2.87812	1.99787	4.66108	3.71622	1.95976	3.09224	2.36629	2.36224	2.08293	2.45258	3.78077	2.34303	1.73743	2.2627	4.80325	5.57388	4.91296	3.34957	2.95134	3.10193	4.21195	1.37916	2.05793	1.90246	2.18627	3.86	2.17028	3.33666	1.81278	2.10725	3.25521	2.89369	2.1782	4.18646	4.4547	2.56651	3.66214	4.11605	2.11816	3.4582
Cp578	Positive	195.144	10.1	6.56695	3.62428	4.62828	3.61702	2.4423	2.76725	4.3662	2.8458	NA	3.53753	NA	4.39833	2.38083	3.38522	3.02361	2.0836	3.23877	3.33812	2.95001	3.2027	4.08358	6.13414	5.15681	2.03625	2.6572	4.85285	4.93131	NA	4.98144	NA	4.79147	3.62602	1.98587	4.45391	3.43714	4.37127	3.47311	3.4501	5.12748	4.73452	5.77686	NA	5.47173	4.68624	2.68124	3.97524
Cp710	Positive	196.073	4.66	1.41965	2.81338	1.18486	1.25958	1.76357	2.23492	3.85058	2.32614	1.69383	3.33418	2.00481	1.83141	2.49311	3.95166	3.07563	1.32766	3.63684	1.07129	2.54231	2.56452	3.72469	5.16845	2.70149	3.59785	4.1403	3.70515	2.61062	0.43705	1.15684	1.5505	1.79275	2.74505	1.28	1.4828	1.87075	1.59842	2.39755	2.36138	1.86431	3.44662	4.70742	3.19249	3.68919	3.44107	1.32475	1.22318
Cp1576	Positive	197.178	9.55	NA	NA	0.506797	NA	0.135766	0.39609	0.974271	0.356749	NA	0.683232	0.474185	1.04115	0.564354	0.944118	0.924866	0.458635	0.367286	0.361617	0.271939	NA	1.21911	NA	1.45862	1.02529	NA	NA	0.945785	0.187244	0.691345	0.393687	0.397025	0.622497	0.276359	0.556651	0.766966	NA	0.447453	1.4294	NA	NA	NA	0.637435	1.21114	0.631926	0.351698	NA
Cp1187	Positive	198.029	3.94	0.829024	1.19102	1.00787	0.844584	0.615817	0.833562	1.27703	0.894867	0.295265	1.16167	0.401435	1.07845	1.40477	1.72841	2.07714	0.555347	1.37755	1.05996	1.12141	1.35528	2.01346	2.38713	1.32175	2.0111	1.8412	1.58007	1.90109	0.761489	0.554564	0.981373	1.00987	1.54509	1.30128	0.734486	1.3378	0.853708	1.82846	1.40484	1.41746	2.36931	2.00101	1.54097	1.41276	2.39016	1.25132	1.48463
Cp1362	Positive	198.046	3.99	NA	3.13705	1.37874	0.652131	1.42111	1.62453	1.28671	1.35196	1.37565	1.55557	1.67051	NA	NA	2.26478	1.35581	0.803975	1.9665	1.05867	1.17438	1.34503	0.596611	0.768271	0.271691	0.661547	1.63851	2.19428	NA	NA	NA	0.397616	1.45434	NA	1.5934	1.65344	0.895657	NA	NA	1.2725	0.599341	NA	1.6077	0.846823	0.514796	1.46921	NA	NA
Cp1590	Positive	198.051	2.65	0.339079	0.918017	0.449135	0.622931	0.68707	0.842967	1.19927	0.603137	0.57094	0.767295	0.506255	0.648715	0.387245	1.99554	0.412691	0.691751	0.852177	0.342449	0.455835	0.846057	0.709781	0.709697	1.03655	0.963778	0.992249	1.17975	0.911611	0.16796	0.440357	0.412924	0.912917	1.25765	0.508978	0.652484	0.766587	0.284303	0.801783	0.571542	0.405587	0.767706	1.79076	1.18667	1.03378	0.992156	NA	0.450284
Cp1764	Positive	198.16	9.12	0.600364	NA	0.543283	NA	0.136515	0.194686	0.744362	0.37117	0.343229	0.540245	NA	0.634674	0.380449	0.910019	0.423187	0.173098	0.21289	0.180224	NA	NA	0.587124	0.611704	NA	0.69856	0.421286	0.288468	1.14895	0.126449	0.307237	0.46305	0.480396	0.457486	0.295142	NA	0.648505	0.240943	0.443844	0.862178	0.532267	0.557393	0.613061	0.470988	0.868684	0.472997	NA	0.452827
Cp613	Positive	199.084	1.33	2.21885	2.01717	1.94992	1.62402	2.20168	3.14829	4.61109	2.32968	2.15008	2.75358	2.03775	1.65497	1.72704	4.49773	4.80093	1.60849	3.71427	1.45792	1.87389	2.02261	4.43759	4.36947	2.73288	4.07732	4.40995	5.94463	3.30268	0.93681	2.13736	1.86168	2.46793	4.0548	2.10513	2.26118	1.61602	1.39056	2.17638	1.89809	2.37968	2.55897	5.24134	4.2134	1.45097	3.30719	0.830514	0.446215
Cp420	Positive	199.12	3.5	1.60948	2.11906	5.26657	1.35282	1.77973	3.92368	4.49756	2.55872	1.54791	4.60809	1.34157	7.61963	4.96256	4.66742	8.28181	3.12978	4.10033	5.83286	3.7262	4.6546	8.62457	4.38071	5.26844	5.48083	3.27636	7.91616	5.32408	1.15526	1.79523	2.7023	6.27583	4.07194	3.93654	3.36757	6.54769	2.67252	4.25755	5.11284	6.02931	4.64697	7.71626	2.99551	4.20719	5.56211	3.46511	5.00145
Cp1748	Positive	199.157	4.06	0.448169	0.305548	0.220919	0.184269	0.131701	NA	0.54726	NA	0.323046	0.421276	0.353767	0.626022	0.415246	0.508906	0.579866	0.260824	0.203808	0.114306	0.291394	0.179703	1.02747	0.792492	0.545839	0.62297	0.441086	0.437596	0.656791	NA	0.392405	0.323512	0.222505	0.339544	NA	0.442046	0.541789	NA	0.442796	0.387617	0.186418	0.295032	0.509463	0.73504	0.59288	0.413703	0.210993	0.457532
Cp1245	Positive	199.193	9.98	1.99108	2.02348	1.48276	1.23005	1.33381	1.48668	1.53496	1.16069	0.712221	1.47935	1.23475	1.95338	0.653791	1.27348	0.918173	0.887636	2.35411	1.23305	1.29622	0.669282	1.19878	1.43111	0.94935	1.11144	1.12942	1.76983	1.05907	1.17602	0.665477	1.03489	1.11888	1.75621	1.26555	2.0825	1.66515	1.04529	0.895487	2.43396	0.629996	1.29172	1.16869	0.701915	1.14728	1.19007	1.07182	1.59806
Cp1237	Positive	200.117	8.09	2.01927	1.47542	1.39519	0.831201	NA	NA	1.99362	NA	NA	NA	1.40371	1.72929	NA	NA	NA	NA	NA	NA	NA	NA	2.23153	2.33885	1.70288	2.17088	1.55904	1.27122	2.41416	NA	1.66687	NA	1.6294	1.6784	NA	1.83297	1.69382	1.17016	1.7216	1.72713	NA	1.70117	2.02949	2.04345	2.21438	1.54502	NA	1.54122
Cp965	Positive	200.123	6.92	3.22576	2.00989	2.01603	1.30426	1.08806	1.04786	2.69419	1.27093	1.51289	3.13019	1.65079	3.86463	2.50411	2.71034	2.07714	1.51916	1.41573	1.34677	1.14953	1.15666	3.28272	4.57971	3.42923	2.6892	2.5199	1.83072	4.42027	0.902364	3.46014	1.18187	2.54177	2.79335	1.02899	2.7474	2.32856	2.15141	3.04987	2.6551	2.52234	3.47476	3.53439	2.75477	3.50039	2.81036	1.51183	3.36982
Cp698	Positive	200.177	10.82	1.92022	0.712167	0.808557	0.284699	0.275919	0.797016	1.98768	0.467355	0.833912	1.21627	0.870006	3.00275	1.09405	1.24455	1.36083	0.49287	0.595724	0.601916	0.267253	0.156768	1.56729	2.30022	1.00571	1.45616	1.17879	0.356997	2.25859	NA	0.95124	0.430265	2.2314	1.36824	0.0954909	1.26263	1.61728	0.802211	1.22328	3.0055	0.60445	1.59552	1.73462	1.1879	1.7046	1.05998	0.0983762	1.37616
Cp295	Positive	201.118	6.91	11.3859	6.44287	7.24239	4.43882	3.66505	3.33882	9.86179	4.57137	5.82706	9.5297	4.77417	12.4593	10.1214	8.49561	7.17623	5.7622	4.40481	5.34922	3.96548	4.21333	12.9264	14.4121	10.7446	8.86741	8.48199	7.13914	15.0658	3.55205	10.2605	3.81196	9.50582	10.7777	3.57914	7.95584	8.70727	6.48346	10.7999	9.10807	10.2973	12.7481	10.7455	8.8333	12.8687	10.9259	4.95199	9.97937
Cp1608	Positive	201.172	4.07	0.375836	0.515792	0.227501	0.230723	0.0228952	0.203822	1.08264	0.24541	1.13749	1.3109	1.04533	1.12766	1.31248	1.47015	1.03211	0.980283	0.189646	0.124474	0.249218	0.295602	1.57217	1.23496	1.0214	1.35124	0.835797	0.423113	1.78499	0.391564	1.16684	0.307255	1.08021	0.961225	0.093652	0.267034	0.990123	0.478018	1.15448	0.776469	1.072	1.1039	1.57054	0.890037	1.47941	1.06566	0.388671	0.472156
Cp297	Positive	201.172	3.58	9.91862	6.71876	6.71184	3.77021	3.77942	3.45625	9.11989	4.98202	8.91173	9.40176	7.21348	9.05804	9.29593	8.69407	9.00938	6.11299	4.4804	4.01308	4.31666	3.5316	12.6504	12.273	10.3098	11.4376	8.38819	6.82478	14.3292	2.58167	9.38159	4.27799	8.20826	9.06253	3.47196	9.069	8.25414	6.25746	10.3933	7.95263	6.30101	9.60877	10.5964	11.9609	10.5999	8.97327	4.34658	9.0348
Cp1322	Positive	202.085	5.13	0.640073	0.321066	NA	0.29034	0.68354	0.697725	1.59309	0.798071	0.574146	0.830542	0.22112	NA	NA	0.851032	NA	NA	1.54919	NA	0.765547	0.956954	0.944115	2.13764	1.29296	0.766592	0.148245	0.700717	0.752914	NA	NA	0.250898	0.437889	1.43517	NA	NA	0.627162	NA	0.73101	0.43271	0.513141	NA	1.44104	1.05553	0.92641	1.19968	0.350392	0.394078
Cp1833	Positive	204.003	4.25	0.732925	NA	NA	NA	NA	NA	NA	0.583582	0.227474	NA	NA	NA	NA	NA	0.333438	0.27762	NA	NA	NA	NA	NA	1.65575	NA	NA	NA	NA	0.762433	NA	NA	NA	NA	NA	0.492428	NA	NA	NA	NA	0.39503	NA	0.931912	NA	NA	0.838008	1.5744	NA	NA
Cp39	Positive	204.072	5.24	36.6352	48.3561	57.7545	38.0598	37.1438	45.5574	21.5793	46.9809	50.1069	73.1647	44.049	42.934	46.681	51.9411	29.0904	28.5304	55.9033	40.9975	49.3113	51.3542	45.2748	34.7566	6.69267	19.6796	42.8277	33.4715	40.4281	17.8122	10.8643	36.4445	37.7267	73.2268	37.6314	60.4837	32.8925	57.2461	5.02814	46.4226	68.0054	41.1788	50.658	38.0915	20.2716	39.4419	73.4021	27.7896
Cp1730	Positive	204.073	8.41	1.58572	1.48805	1.81428	1.23148	1.42143	1.72853	1.06507	1.90718	2.01307	2.95565	2.0103	1.44025	2.38532	2.56926	1.94359	1.31418	2.301	1.63207	1.78188	2.3215	1.96182	1.99295	0.733471	1.42227	2.62633	1.06697	1.52268	1.0375	0.454999	1.56405	1.45028	3.07834	2.07361	2.31312	1.96054	2.33152	0.652787	2.55827	2.89007	1.94543	1.59724	1.7205	0.790182	1.43686	2.47678	1.07554
Cp983	Positive	204.073	8.41	1.08573	1.72027	1.82759	1.41288	1.44989	2.02841	1.80827	1.06316	2.1724	3.06149	1.96974	2.00415	2.76278	2.12047	2.30486	1.41421	2.82284	1.75806	1.92303	2.67871	2.15238	2.01052	0.444176	1.72568	3.2675	1.58047	1.79077	1.56979	0.487577	1.66077	1.39813	3.42251	2.18631	2.31524	2.16615	2.59248	0.85137	2.69927	2.77924	2.03128	3.18917	2.09879	1.90706	2.30028	2.80157	1.54312
Cp1326	Positive	204.089	3.18	NA	0.773414	0.74045	0.433906	0.890346	NA	1.39469	0.332795	1.57926	1.14726	0.531213	1.23517	NA	0.977571	NA	0.736148	0.978403	0.673445	0.509939	NA	2.04748	0.746266	1.16359	1.171	0.789161	1.71283	1.37725	NA	0.363609	NA	0.587321	1.08243	NA	NA	0.565406	0.918947	0.749518	0.942017	0.777637	0.651871	0.97517	1.03849	1.46212	0.682962	NA	0.746574
Cp1754	Positive	204.151	10.52	0.450531	NA	0.545286	0.383027	0.470315	0.474555	0.645424	0.772773	0.332544	0.895871	0.389955	0.352014	0.396216	0.55755	0.475819	0.398511	0.691009	0.284011	0.4831	0.638417	0.684165	0.685159	NA	0.450936	0.565362	NA	0.532892	0.183417	0.478304	NA	NA	0.284858	NA	NA	0.645095	0.501899	0.55757	NA	0.282575	0.331522	0.888946	0.48721	0.490953	0.410319	NA	NA
Cp1453	Positive	205.074	4.95	0.567888	0.707086	0.47489	0.500159	0.521989	0.839608	1.15884	0.826303	NA	0.619344	0.272657	0.589289	0.549946	1.12367	1.37437	NA	1.25841	0.746259	0.633909	0.919012	1.03709	1.57042	0.693898	1.22235	0.852992	1.64015	0.911923	0.269384	NA	0.568042	0.671569	0.986119	0.626273	0.80195	0.969285	0.41398	0.863942	0.560269	0.529909	0.87067	1.08729	0.718409	0.775402	1.14472	0.451511	0.426123
Cp372	Positive	206.024	8.64	2.18165	3.47913	1.4188	0.419859	NA	1.07971	4.48929	0.915277	4.76116	4.07425	5.54847	2.11705	2.87559	3.79118	6.61735	1.73291	1.23624	0.515076	0.848478	0.40357	4.70784	1.92297	2.30699	8.94535	2.34964	1.12249	3.64223	0.950352	1.8965	1.42668	2.5857	2.89905	1.34094	3.0884	1.93465	0.885994	1.97384	2.31196	1.00545	2.556	3.82797	9.27989	2.54693	1.7026	1.06084	3.88686
Cp1253	Positive	206.058	6.24	NA	1.26778	0.597082	0.553249	0.418426	0.873332	1.51288	0.735375	0.259767	NA	NA	0.0519085	0.291963	0.842628	0.531494	0.292384	1.13064	0.39668	NA	0.899493	0.984097	1.41385	0.833905	1.29142	1.01153	1.54775	0.650393	0.230522	0.310532	0.773827	0.858468	1.25479	0.171674	0.640064	0.419413	0.126742	0.292055	NA	0.690913	0.7612	0.475038	NA	0.536967	NA	0.298656	NA
Cp1666	Positive	206.058	6.55	0.440788	NA	0.217056	NA	0.272817	0.803869	0.707809	0.55095	NA	0.150353	NA	NA	0.226176	0.748248	0.544575	0.0353043	0.783061	0.3241	0.393211	0.743945	0.829591	0.882886	NA	0.644213	0.868364	0.0496202	0.984796	NA	0.216457	0.40019	0.309053	0.268397	0.133057	0.498219	0.505165	0.0652388	0.403219	0.640881	0.224278	0.752007	0.182422	0.527015	0.39028	0.499395	0.412187	NA
Cp1786	Positive	206.094	10.95	NA	NA	NA	0.0517634	NA	NA	0.406861	NA	0.379202	0.256512	0.402808	0.303225	0.392954	NA	NA	0.209472	NA	0.163277	NA	NA	0.459589	0.344796	NA	0.421482	NA	0.171659	0.5215	NA	NA	0.0975412	0.360544	0.358725	0.156568	NA	0.299184	NA	0.426966	0.346384	NA	0.30861	NA	0.494707	0.197023	0.244621	0.175718	0.387974
Cp115	Positive	206.151	6.4	12.9315	14.5673	14.7538	5.95479	20.0294	25.7771	4.3219	12.0022	4.27368	2.6407	3.2332	3.14727	3.61638	4.6267	26.1731	2.38454	12.1295	8.72614	8.67109	11.976	7.5349	7.22298	7.28627	3.94752	8.29922	13.7868	4.58864	1.50723	5.72001	23.3061	3.97255	4.95617	18.2967	21.6038	4.96249	23.7325	5.41494	1.73764	2.89518	4.02777	3.36049	6.80553	8.22726	5.80849	28.9897	25.1723
Cp1218	Positive	206.165	10.53	1.32797	NA	NA	1.12021	NA	1.51866	2.13712	1.20786	1.12918	1.81704	0.935768	0.89606	0.976609	1.44995	1.57653	0.978785	1.74638	1.05329	NA	1.38761	1.48895	1.72778	1.1318	0.952179	NA	1.47882	1.46104	0.564382	1.03201	0.896973	0.905906	NA	0.957668	NA	1.38743	0.960839	1.24458	1.07776	0.803838	0.613684	NA	NA	1.00003	0.866664	0.761925	NA
Cp898	Positive	206.166	10.45	3.59332	3.43505	3.04894	1.90153	3.08807	3.46404	4.91281	3.06763	1.79153	2.31069	1.00128	1.10072	2.61204	3.62246	2.28387	1.21265	2.25959	0.786348	1.03663	1.78715	2.8524	2.39584	1.26553	2.90072	1.48714	2.95119	1.70978	0.482536	0.357508	1.27793	1.9046	2.00121	1.17255	1.88533	1.56917	1.01154	1.42803	1.08425	0.680694	1.54107	1.51102	1.9517	1.55638	1.23082	1.04112	1.35835
Cp512	Positive	207.076	5.73	3.58993	4.34729	1.91873	1.0846	0.686642	1.57616	5.70923	1.6058	3.82954	5.03737	4.46807	3.86477	4.43259	4.24449	6.08038	2.8758	1.6688	1.18069	2.05396	0.702344	6.111	3.80732	4.39728	6.89724	2.92268	2.18436	5.46811	1.5062	3.42427	1.62406	3.69319	4.30565	1.62571	3.8576	2.95471	1.47048	3.50966	3.60824	2.30854	4.05577	4.92218	7.4078	4.29545	3.71845	1.55508	3.80777
Cp1787	Positive	207.093	1.81	0.714325	0.403598	NA	0.342324	NA	NA	NA	NA	NA	0.10712	NA	NA	NA	0.400628	NA	NA	NA	0.0289855	NA	NA	4.46388	1.03613	0.304714	4.23346	0.294926	0.188288	NA	NA	NA	0.0658403	0.0979417	NA	NA	NA	NA	NA	9.25368	5.34772	0.389997	NA	142.151	23.5417	33.2862	9.31725	NA	NA
Cp442	Positive	208.002	2.77	0.971476	2.50439	1.42123	2.02143	1.98782	2.61717	3.05792	1.50081	1.04073	1.2507	1.04895	1.83538	0.877521	3.07719	3.01646	1.30861	4.61971	1.28787	1.76228	1.66162	2.67987	3.65977	2.45136	3.11055	2.72377	4.56988	2.54493	0.635188	1.20528	1.93023	2.00507	2.70996	1.44235	1.77298	1.62549	1.30638	1.4264	1.93144	1.19554	2.51555	2.82899	1.51507	2.23948	1.83378	1.24832	0.790445
Cp1420	Positive	208.02	8.64	0.453041	0.58061	0.226356	0.0819588	0.144539	0.118504	0.709488	0.154481	0.717089	0.476517	0.913556	0.453278	0.351362	NA	1.4413	0.221775	0.324184	0.0961897	0.0553818	0.126512	0.614502	NA	0.297209	1.31788	0.380381	0.213233	0.578301	NA	0.330908	NA	0.438875	0.34036	NA	0.392648	NA	0.157427	0.330351	0.412326	0.129169	0.432789	0.520724	1.53129	0.451074	NA	0.0905374	0.576684
Cp1847	Positive	208.073	3.32	0.255527	0.238945	NA	0.253619	0.240079	NA	NA	0.0754074	0.321265	NA	0.332055	0.661621	NA	NA	1.35125	0.475003	NA	0.460027	0.149105	0.137736	0.593901	1.18526	0.360936	1.21622	0.146812	0.189764	0.275886	NA	0.288935	0.265122	0.407433	0.458847	0.554294	NA	NA	0.259888	0.638702	0.29743	0.129824	0.191927	0.651025	0.389604	0.600968	0.434144	NA	0.21605
Cp1763	Positive	208.109	7.87	0.274865	0.253914	0.209758	0.236917	0.192791	0.183534	0.595825	0.206668	0.274251	0.343137	0.610327	0.330598	0.595616	0.777015	0.481599	0.484525	NA	0.0197522	0.159897	NA	0.544161	0.388172	0.636448	0.616714	0.727545	0.33165	0.974653	0.298384	0.518814	0.306848	0.663023	0.693099	0.00288968	0.549453	0.795382	0.0217463	0.523114	0.34762	0.380172	0.222335	0.707007	0.895899	0.709449	0.695822	NA	0.342196
Cp1181	Positive	208.109	7.6	1.42142	1.19294	1.15553	0.57161	0.59335	0.738839	1.88835	1.01024	0.928298	1.76596	1.4998	1.48138	1.16106	1.47258	1.17464	0.941662	1.02443	0.757128	0.757737	0.685264	1.81694	2.10487	1.71339	1.55312	1.7491	1.22897	2.53151	0.45972	1.49861	0.864459	1.38455	1.45571	0.406395	1.23807	1.79068	1.25755	1.53291	1.47047	1.13908	1.89112	2.13662	1.5925	1.88726	1.51172	0.919092	1.27532
Cp1670	Positive	208.145	9.78	1.01458	0.573057	0.499929	0.47118	0.38633	0.378489	0.929968	0.548873	0.253237	0.931098	0.509749	0.876488	NA	0.56353	0.423643	0.445155	0.759355	0.480364	0.622265	0.508366	1.07246	1.06462	1.28832	0.81364	0.716211	0.793118	0.930493	0.425274	1.06874	0.378514	1.13378	0.791317	0.242339	0.951557	0.716071	0.519643	0.456765	0.641807	0.53135	1.10559	1.16966	0.566548	1.02778	0.795187	0.325046	0.774041
Cp1722	Positive	208.146	10.38	0.503674	0.300467	0.0847046	0.25196	0.239009	0.245877	0.917568	0.239299	NA	0.502937	0.0595228	0.391725	0.197089	0.265362	0.249775	0.0561659	0.281083	0.236325	0.166146	0.232285	0.549988	0.687534	0.614069	0.445332	0.425975	0.229594	0.512762	0.026644	0.401678	0.128565	0.49179	0.277512	NA	0.350447	0.221767	0.239342	0.379706	0.0943562	0.554931	0.608734	0.6166	0.403781	0.576706	0.420472	0.177025	0.219865
Cp333	Positive	208.182	9.55	6.62732	9.60588	11.738	6.21239	6.80779	6.28503	7.59241	9.09887	3.40534	3.62015	6.48573	6.38517	7.86819	15.098	2.39385	12.0802	7.62757	14.7057	0.804173	5.85421	16.2161	9.93797	11.8926	6.94689	11.3132	11.6063	3.68733	8.01146	8.71648	11.583	15.7911	6.52221	11.9867	24.5782	4.02983	6.77937	2.82358	13.7618	9.66452	7.47849	2.46366	1.576	6.65973	16.9898	6.15093	9.82003
Cp68	Positive	208.182	9.39	68.9705	76.2162	101.88	63.0748	44.9668	43.1787	53.4317	54.3329	47.8601	29.2927	54.7572	43.306	81.797	77.6131	36.0562	42.831	56.9188	71.9438	75.7098	66.5758	44.4166	96.9555	77.2107	60.0521	50.1216	91.0435	74.3274	62.5818	48.4327	79.9318	71.2493	40.8749	81.4756	50.8119	29.0269	46.3216	28.5848	87.3735	60.8013	76.9856	73.4079	79.4085	53.6763	56.0528	59.0474	86.4693
Cp68	Positive	208.182	9.39	68.9705	76.2162	101.88	63.0748	44.9668	43.1787	53.4317	54.3329	47.8601	29.2927	54.7572	43.306	81.797	77.6131	36.0562	42.831	56.9188	71.9438	75.7098	66.5758	44.4166	96.9555	77.2107	60.0521	50.1216	91.0435	74.3274	62.5818	48.4327	79.9318	71.2493	40.8749	81.4756	50.8119	29.0269	46.3216	28.5848	87.3735	60.8013	76.9856	73.4079	79.4085	53.6763	56.0528	59.0474	86.4693
Cp71	Positive	208.182	9.39	69.2925	75.7171	101.978	63.1798	46.1442	43.4895	53.5164	54.5286	47.8493	29.3854	54.738	44.1415	81.9763	79.4058	36.9481	42.8487	57.3314	72.0897	75.9244	66.6111	45.6882	96.9535	77.3036	55.4715	50.375	91.1784	67.8667	59.861	42.3288	77.2604	71.2182	38.0308	81.6172	40.1075	29.2009	43.2814	29.8281	87.5218	60.4771	76.9645	73.7677	79.8021	54.0439	55.9318	59.2141	80.2687
Cp71	Positive	208.182	9.39	69.2925	75.7171	101.978	63.1798	46.1442	43.4895	53.5164	54.5286	47.8493	29.3854	54.738	44.1415	81.9763	79.4058	36.9481	42.8487	57.3314	72.0897	75.9244	66.6111	45.6882	96.9535	77.3036	55.4715	50.375	91.1784	67.8667	59.861	42.3288	77.2604	71.2182	38.0308	81.6172	40.1075	29.2009	43.2814	29.8281	87.5218	60.4771	76.9645	73.7677	79.8021	54.0439	55.9318	59.2141	80.2687
Cp40	Positive	208.182	9.39	68.7032	75.4823	99.1267	62.8389	46.0184	43.1974	53.0561	54.1508	47.3165	29.0456	54.4506	43.3465	81.5994	76.9826	36.698	42.4918	57.0164	71.7715	75.4846	66.3684	45.3032	95.9066	71.1397	59.828	48.36	90.7824	73.9772	62.3835	48.2832	79.6572	70.8415	40.8919	81.2022	50.7093	28.8982	46.445	30.4668	87.0375	60.5691	71.3561	73.4597	79.3195	53.4584	55.4746	58.844	86.16
Cp1211	Positive	209.08	6.02	1.05547	0.917742	0.704679	0.825782	0.872479	1.08213	2.40009	0.945097	NA	1.98309	0.937764	1.66802	0.545324	1.35671	NA	0.991088	1.47838	NA	0.891648	1.05736	1.90355	2.70549	2.02042	1.04302	1.19182	2.27314	1.62068	NA	0.906216	0.950891	1.56159	1.41273	0.567692	NA	1.04418	NA	1.18486	NA	0.767419	1.02667	0.922245	1.70741	2.17798	0.846629	NA	NA
Cp1862	Positive	209.16	10.61	0.791529	NA	0.449993	NA	NA	NA	NA	0.334994	0.218807	NA	0.293621	NA	NA	NA	0.478253	NA	NA	NA	0.387389	0.40967	NA	0.825737	NA	NA	NA	NA	NA	NA	NA	0.275147	NA	NA	NA	NA	NA	0.501632	NA	NA	0.716065	0.625706	NA	NA	0.738451	NA	NA	NA
Cp844	Positive	209.983	5.12	0.395912	0.893573	1.06582	0.259038	0.48647	0.802794	2.4174	1.06096	0.920224	0.553375	1.59064	NA	0.591538	1.85818	2.26957	1.04084	0.942228	0.23165	0.942485	0.608771	1.07585	0.877345	0.445541	3.33171	1.40702	1.69325	0.390111	0.566001	0.124701	0.896024	1.25319	0.828182	0.726099	0.909215	1.14837	0.565937	0.370394	1.41457	0.384233	0.701656	1.24993	3.01268	1.56419	1.09125	0.703135	0.218593
Cp885	Positive	209.983	4.23	0.910362	1.82052	1.37259	0.682326	1.0688	0.933793	2.89517	1.17083	1.83463	2.52557	1.9358	1.62845	1.47912	2.89748	2.68135	1.74895	1.43004	0.967624	1.08619	0.888879	3.13838	2.39505	2.24299	3.28649	2.19253	1.71498	2.21146	0.834797	1.17758	1.12945	2.02752	2.19438	0.916949	2.01786	1.67159	1.19244	1.41115	2.37049	1.05196	2.34215	2.84717	3.70165	2.72583	1.84285	1.06045	0.782434
Cp1669	Positive	210.046	6.21	0.473855	NA	0.481328	0.268772	0.314007	0.277317	0.870295	NA	1.01413	0.884183	0.724006	0.942296	NA	0.71722	0.987081	0.605736	0.491356	0.444366	0.385259	NA	1.20772	1.13096	0.829266	0.422394	0.523155	0.681406	0.810807	0.0917084	0.312728	0.343426	0.631362	0.596106	0.230387	0.840198	0.617311	0.758718	0.418119	0.305924	0.215632	0.305357	0.222478	0.869316	1.28713	0.442402	0.466928	0.644843
Cp1238	Positive	210.047	6.53	1.39086	1.52197	1.71327	1.31433	0.39521	0.711967	1.41898	0.721931	0.475131	0.896992	0.433755	0.593686	0.42177	1.79596	0.632499	1.24014	1.0192	1.45792	0.933255	0.54704	2.47779	0.976921	0.828037	1.08355	0.870057	0.488826	1.94712	0.0429837	0.529185	0.59175	2.02785	1.50958	0.466421	2.13289	1.44995	0.914945	0.303579	0.63424	0.8603	1.08692	1.67671	1.65916	0.928502	0.708683	0.680664	0.463891
Cp1409	Positive	210.088	3.65	6.56695	9.45207	3.05595	5.80713	4.2798	8.14107	6.58237	8.6221	0.948124	2.09277	2.21644	1.573	2.64819	8.80299	6.15431	2.82959	7.55784	2.01437	5.12438	2.62894	6.39778	22.0329	2.40278	4.28324	2.71465	7.32716	6.5495	1.73701	3.63365	4.4873	5.02011	10.3002	2.11814	4.73661	3.0541	4.53216	5.76881	2.92025	3.0102	8.88972	4.21324	3.39084	3.72	6.87443	2.67954	1.68771
Cp681	Positive	210.089	4.95	2.26993	2.31379	2.64301	1.91569	1.86008	3.02992	4.06706	2.35865	1.39963	3.11305	1.39086	3.24513	2.56256	6.70935	5.06318	1.55532	4.69667	2.09081	2.85231	2.6792	4.97158	5.68612	3.25661	4.3673	4.82928	3.97686	2.37234	0.832883	1.07118	2.5018	3.02841	3.88585	1.98482	2.35193	2.824	1.64191	2.64328	4.19831	2.294	3.01199	4.91333	3.96243	3.40097	3.64156	1.72465	1.55126
Cp1732	Positive	210.104	10.18	NA	NA	0.304908	NA	0.566068	NA	0.6152	0.204101	0.473825	0.782987	0.578881	0.970377	NA	NA	NA	0.284467	NA	NA	0.160323	NA	0.498351	0.537299	0.496031	0.686309	NA	NA	0.581733	NA	NA	NA	NA	0.449188	NA	NA	0.888458	NA	0.434881	1.26802	NA	0.607178	1.03726	0.949336	0.728551	NA	0.239212	0.351097
Cp893	Positive	210.158	8.51	0.491421	NA	0.543426	NA	0.744629	1.45242	0.401178	0.949986	NA	NA	NA	0.14679	NA	0.124924	NA	0.409423	2.33671	1.34572	3.56261	0.28389	NA	0.297145	0.208374	0.118338	0.0173256	0.481986	NA	2.7882	0.164478	0.908217	0.0962983	0.186096	0.542867	NA	0.152686	1.84456	NA	NA	NA	0.400825	0.410852	NA	NA	0.732509	0.683669	0.463128
Cp782	Positive	212.068	11.59	1.5153	1.71752	0.327515	0.634655	1.63187	1.16435	2.45886	1.1844	1.9606	4.95459	3.26364	1.68972	0.732762	1.34054	1.34197	1.40062	2.66783	0.532842	1.49545	1.77385	3.11276	3.78753	2.61743	1.23304	1.72474	1.98843	1.22542	0.382732	1.84769	0.935718	0.672007	2.15072	1.08048	1.06122	0.857012	1.55279	1.69599	1.96218	1.69152	1.43499	3.05806	2.09061	2.65262	2.09776	0.664203	0.535992
Cp1084	Positive	212.068	11.25	1.19349	1.2822	0.271713	0.37805	1.14401	1.0617	2.06905	1.18611	0.949549	3.16141	1.82037	0.860745	0.433867	0.934099	0.644364	1.01452	2.03962	0.461079	1.2512	1.77593	1.91967	3.43498	2.18185	1.16357	1.12408	0.954719	1.24648	NA	1.24408	0.737384	0.577352	1.54917	0.659899	0.594617	1.11502	1.07904	1.6159	2.01437	1.39479	1.676	2.5264	1.8376	2.43413	2.00733	0.376651	0.56206
Cp1842	Positive	212.133	5.4	0.964686	0.486542	0.676492	NA	0.446885	0.410332	NA	0.537751	0.605726	0.472514	0.357012	0.236141	0.303381	0.584862	0.903721	0.693034	0.250142	0.636044	0.964496	0.533376	0.893562	1.01175	0.744797	NA	0.7592	0.942113	0.722329	0.209766	0.614963	0.717199	0.66138	0.395318	0.386036	0.630184	0.728321	1.05129	0.649761	0.441513	NA	0.568566	NA	0.854866	1.45069	0.940579	0.595352	1.04274
Cp1268	Positive	212.14	9.76	0.142156	0.614529	NA	0.344315	0.0395852	1.66081	0.712846	0.332795	0.20088	0.218083	0.0198409	NA	0.431964	1.54175	0.433074	0.154697	1.51317	0.855188	0.732176	0.673674	0.298848	0.75054	0.156519	0.759684	1.70625	0.697767	0.52899	0.325469	0.142759	0.259974	0.378839	1.45626	0.778901	0.685087	0.439998	0.0952567	0.397399	0.034901	0.694188	0.803065	0.744488	0.446313	0.465436	1.30108	0.0496453	NA
Cp1374	Positive	212.174	9.27	1.56594	1.10299	1.06682	0.533561	0.420459	0.480064	1.57746	0.341839	0.520839	1.17528	1.09574	1.48648	0.753287	1.12851	1.25906	0.88571	0.611579	0.739947	0.847768	0.439803	1.2454	1.97474	1.91808	1.02699	1.32586	1.06388	1.87284	0.515363	1.56779	0.863511	1.19305	1.49476	0.704952	0.747047	1.28173	1.20031	1.14855	1.1244	1.43331	1.00616	1.8453	1.31345	2.01945	1.4221	0.873236	1.5435
Cp1825	Positive	213.043	4.41	0.584273	NA	0.205466	0.310249	0.33166	NA	NA	0.461733	0.403303	1.04174	0.527594	0.47285	0.302973	1.07987	NA	0.460133	1.14573	0.623889	1.3249	0.94939	0.813191	NA	0.834315	NA	1.64424	1.30863	1.63035	0.396863	0.457073	0.306171	0.371718	NA	0.597639	0.759608	0.277714	0.515774	0.67502	NA	0.585455	1.02724	1.0622	0.788751	0.823786	1.0195	0.474636	0.471647
Cp1720	Positive	215.188	7.54	0.32166	0.351964	0.304479	0.266007	0.321068	0.584998	0.33608	0.314218	0.236734	0.458263	0.447481	0.543763	0.343478	0.304956	0.362188	0.308645	1.03874	0.368162	0.700225	0.248022	0.406731	0.368225	0.313721	0.286201	0.286849	0.410372	0.220803	0.473851	0.182292	0.277721	0.321871	0.381579	0.261122	0.557074	0.384936	0.468012	0.4414	0.471935	0.295413	0.241853	0.546623	0.280002	0.262976	0.512797	0.378611	0.471139
Cp1076	Positive	216.026	11.25	1.20161	1.48421	NA	0.295206	1.19515	1.13856	2.22262	1.19796	0.967714	3.03235	1.85444	0.719628	NA	0.990015	0.771989	0.895874	2.10289	0.458157	1.35061	1.79264	2.0262	3.46711	2.06491	1.34238	1.16042	1.0663	1.22854	NA	1.22077	0.579828	0.531449	1.564	0.612219	0.683817	1.15493	1.12574	1.77456	2.01128	1.45781	1.50232	2.58383	1.91108	2.43775	2.10926	0.329488	0.467197
Cp1068	Positive	216.044	5	NA	1.36638	0.744599	0.690843	0.370282	1.59847	1.09904	0.485076	0.33385	0.845914	NA	0.428458	0.272526	0.85087	0.642842	0.741711	0.917445	0.451495	0.465207	0.866553	0.504179	1.34246	0.390411	0.609025	0.811307	NA	0.812679	NA	NA	0.42322	0.351889	1.67419	0.687613	0.41777	0.402616	0.541789	0.727169	NA	1.05183	1.10333	0.785992	0.410325	0.884161	2.87968	NA	NA
Cp1631	Positive	216.045	5.91	NA	NA	NA	NA	0.18252	NA	0.623595	NA	NA	0.557218	0.377601	0.826849	0.958803	0.627204	NA	0.384282	0.201499	NA	NA	NA	1.32035	1.44678	1.26716	0.756556	0.476258	0.228119	0.790677	0.313398	0.54883	NA	0.619749	0.707383	NA	0.583749	1.1735	NA	0.509728	0.604435	0.344408	1.05355	0.786796	0.411688	0.960293	0.690001	0.160302	0.565239
Cp720	Positive	216.099	9.65	3.53664	1.34002	0.126485	0.401388	0.18252	0.121863	0.739195	0.432279	0.376234	1.20971	0.265669	0.948252	0.271575	0.126055	0.272136	0.345126	0.333574	0.230598	0.542884	0.584615	2.92139	5.09278	0.97555	0.8891	0.791376	0.182656	3.25665	NA	NA	0.172865	0.392205	2.82232	NA	0.412407	0.651031	0.26856	2.35413	0.809054	1.49082	4.07572	1.81747	0.517882	1.74601	1.72412	0.352351	0.520097
Cp1692	Positive	216.101	9.06	NA	0.325048	NA	0.205395	NA	0.162843	0.627599	0.181613	0.353202	0.470112	0.469069	0.51015	0.426935	0.597629	0.583517	0.392948	NA	NA	NA	NA	0.913485	0.643682	0.463008	0.934585	0.523936	0.35351	0.877594	NA	0.443896	NA	0.578009	0.479388	NA	0.392365	0.464752	NA	0.567697	NA	NA	0.532501	0.574935	0.773074	0.659949	0.441049	NA	0.446851
Cp1133	Positive	216.171	9.67	0.0267189	0.143367	0.406353	0.317659	0.0114476	NA	0.983183	0.02261	1.03598	1.16119	1.23837	1.79198	0.640606	1.14629	0.831162	0.506456	NA	NA	0.270661	NA	0.605692	0.861831	1.37906	0.717458	0.994593	0.0712116	0.727323	NA	0.339938	0.323376	0.791421	0.802472	0.038748	0.0062101	0.663029	NA	0.0568046	0.528147	NA	0.0294184	0.619817	1.74531	1.83455	0.546505	NA	0.452064
Cp360	Positive	217.095	4.44	4.30603	4.40195	4.45601	4.03014	5.07386	8.39702	10.5626	5.32312	2.67282	6.36285	2.36943	4.66283	3.33705	6.09006	6.52319	2.58064	6.90377	3.86664	4.1738	6.10784	9.2796	10.1203	5.65093	8.88722	4.23018	7.86292	5.70311	1.05045	3.59228	4.09565	4.72892	6.48861	4.10388	5.22919	6.86506	2.39316	5.44393	4.2119	3.32015	4.10245	7.94807	4.78335	4.62006	7.34702	3.38869	3.48757
Cp1188	Positive	217.097	1.33	3.11799	2.91211	2.66362	2.56218	3.19934	4.56632	6.20986	3.32171	2.86788	4.19194	2.89166	2.25788	2.51703	6.23099	6.7535	2.15806	5.24914	1.96365	2.82405	3.15439	6.41987	5.9638	3.69669	5.55082	6.02032	8.3492	4.78323	1.30188	3.00038	2.87205	3.6245	5.87074	2.73456	3.09955	2.14594	2.02067	3.07315	2.3989	3.18823	3.54109	7.46194	5.72901	2.83765	4.37515	1.3723	0.587366
Cp1623	Positive	218.094	5.63	0.643616	0.422411	0.358564	0.381036	0.608114	0.547512	1.05112	0.4478	0.505761	0.578674	NA	0.479232	NA	0.496462	0.593861	0.289495	0.655296	0.318139	0.322493	0.625851	0.604472	0.792809	0.423298	NA	0.571614	0.614217	0.657883	NA	0.32493	NA	0.569464	0.488639	NA	NA	0.49784	0.23454	0.427198	0.382675	0.318732	0.392198	0.473751	0.422594	0.460417	0.521867	NA	NA
Cp1478	Positive	218.106	4.3	0.836701	0.960588	0.850766	0.454921	0.502839	0.528702	1.30518	0.54484	0.229492	0.769537	NA	0.388463	NA	0.560459	0.430184	0.288319	0.555239	0.293945	0.514341	0.534962	0.850598	1.53464	0.60629	0.586217	0.765322	0.533082	0.829844	NA	0.441333	NA	0.267313	1.11073	0.281876	NA	0.704326	NA	NA	NA	0.551656	0.811692	0.871894	0.684329	0.607661	1.20415	NA	0.363432
Cp122	Positive	218.167	10.52	9.13802	11.0537	8.1481	7.44011	9.7861	9.61874	15.0522	9.61499	7.81009	13.0773	8.1822	7.50773	7.96837	10.7475	10.3886	7.35282	13.3194	6.84466	7.84789	8.77411	11.2837	12.1294	10.0384	10.4603	8.43014	9.17705	8.91388	3.40778	7.9141	6.57726	5.91101	10.3321	6.67018	4.81113	8.94394	4.66398	8.72451	10.1133	7.80886	5.90885	11.011	10.914	10.4216	10.0915	6.02773	6.56898
Cp250	Positive	218.168	10.29	2.58996	1.39797	1.97654	1.54638	2.86629	4.5733	8.18256	1.83899	1.5738	5.26442	1.12756	0.905421	2.53538	2.96891	5.07337	1.30348	1.26072	0.443898	0.721952	1.08493	1.845	0.885419	0.537651	0.974335	1.47385	1.32177	0.621993	0.242004	0.83386	1.07675	0.80402	0.550399	0.868087	0.949863	1.37481	1.17123	0.6543	0.54359	0.258339	1.10262	0.638317	0.591086	0.704847	0.549077	0.697517	1.15006
Cp1360	Positive	218.168	10.3	2.64798	NA	2.13593	1.64305	2.91144	4.81354	7.39828	2.29229	1.45721	5.35041	1.08077	0.593119	1.88063	2.72989	3.65155	1.59415	1.41927	0.162693	0.888524	0.910961	2.61251	1.29655	0.775637	1.55208	0.865107	1.39687	0.91442	0.233025	1.01188	1.31938	0.99574	1.12311	NA	1.33842	1.73309	1.59802	0.430691	1.00441	0.119082	1.34391	0.328489	0.851186	1.30581	0.219577	0.214912	1.79808
Cp1327	Positive	218.173	10.13	0.666054	1.07443	0.478323	0.271094	NA	0.604749	1.87337	0.763729	NA	1.01612	0.297614	1.16156	NA	1.29788	1.61152	0.387706	NA	0.218209	0.599686	0.513002	NA	1.37	0.572585	0.970556	0.452419	NA	0.793018	0.355941	0.242447	0.44598	1.01108	1.09767	0.597639	NA	1.26897	NA	0.467474	1.44438	0.661568	1.36357	0.722289	0.89399	1.76107	0.697041	0.513568	1.37985
Cp583	Positive	219.111	1.97	1.50054	2.32944	2.20661	1.94942	1.51622	2.27053	4.47922	1.91488	1.05343	1.36726	1.36877	2.58351	2.02634	4.93909	4.59877	1.55938	5.35859	1.80072	1.17495	2.72117	3.24125	4.94936	2.52014	4.3213	3.54966	5.88053	2.76214	0.998194	1.33364	1.4768	2.58724	2.40021	1.94686	2.28391	3.16928	2.32258	2.19431	2.28045	2.28156	3.93004	2.67569	2.43305	2.81479	3.6111	1.95002	2.09654
Cp1376	Positive	219.138	2.34	1.2239	NA	0.605094	0.327614	0.440465	0.475361	1.27509	0.506341	0.552301	1.03277	0.940634	1.09916	1.06482	0.766672	0.976737	NA	0.475039	0.657432	0.460663	0.346597	1.38947	1.47211	1.36391	1.2389	0.765062	0.89142	1.70962	NA	1.17258	0.225022	1.16204	1.39994	0.180999	0.834553	1.06767	0.813151	1.1489	0.828821	0.940343	1.11153	1.53016	1.02295	1.49531	1.1186	0.414277	1.14256
Cp1383	Positive	219.182	1.87	2.32602	0.757072	0.753613	0.609548	NA	0.243458	1.11196	0.607536	0.621516	1.19946	0.439869	1.65242	1.69374	1.04626	0.853675	0.577493	0.42809	0.456404	0.321073	0.26071	1.89243	2.09189	1.81314	0.989323	0.84205	0.276398	2.0679	0.436609	1.93823	0.117185	0.633334	0.824646	0.308671	1.23637	0.878481	0.591552	1.45562	0.558416	1.102	1.21025	0.742397	1.40778	0.875238	1.03141	0.149328	1.35251
Cp517	Positive	220.02	4.94	1.47397	2.26806	2.18257	1.43334	1.52232	1.7859	3.08814	2.1042	0.763272	2.41509	1.02137	2.89525	2.43901	4.82774	3.97099	1.28604	2.92551	2.23282	2.62027	2.8827	3.93002	5.05701	2.56421	2.95546	4.00664	3.4482	2.48532	0.993336	1.08607	1.85708	2.1419	3.27328	1.78806	2.04919	2.28663	1.52557	2.4625	3.18973	2.43732	3.05117	4.12943	3.17204	3.00623	3.58646	1.73811	1.17499
Cp877	Positive	220.111	8.99	0.60804	0.686487	0.306196	0.314009	0.489465	0.827919	0.956188	0.254332	0.576283	0.743277	0.31708	1.671	0.174661	1.01862	0.378161	0.68469	1.84751	0.744739	0.70761	0.276448	0.436413	1.02616	0.242489	0.134238	0.568488	0.387171	0.494973	0.476059	0.383741	0.2215	0.313983	1.22119	0.174432	1.08169	0.792351	1.5756	0.934366	1.25613	0.940212	0.897826	1.68298	0.282729	0.839263	0.716941	0.868924	0.301631
Cp1454	Positive	220.182	10.53	0.918629	0.981599	0.65875	0.60822	0.933247	0.944273	1.43473	0.883012	0.785473	1.1945	0.847045	1.02597	0.99523	1.20576	1.1646	0.559734	1.32552	0.557152	0.859129	0.915108	1.06054	1.44298	1.15731	1.12956	1.0975	1.10626	0.886956	0.226106	0.765043	0.719095	0.833161	0.91987	0.916161	0.704988	1.24763	1.02248	0.498204	1.27836	0.773838	0.576204	0.460077	1.6229	0.501411	0.835935	0.545446	0.629711
Cp797	Positive	221.026	3.63	0.535264	0.587613	1.49278	0.765612	NA	NA	1.38824	0.743441	0.572246	1.20154	NA	1.24198	1.39947	3.68161	NA	0.882287	2.28376	0.893641	1.35188	1.00563	0.9021	0.363635	0.68994	1.84532	1.86361	1.93626	1.60258	NA	0.748326	0.379869	1.34774	1.94326	NA	1.52049	0.412214	0.35221	1.82508	1.26122	1.13567	2.1713	1.95581	0.12596	1.20403	1.47625	0.392329	NA
Cp10	Positive	222.056	8.64	39.3697	56.591	21.969	7.94159	5.82223	18.9825	79.3497	15.5411	86.981	69.358	94.9735	35.9532	46.4469	58.4881	131.188	30.0343	17.6664	8.71679	15.1002	5.38915	92.5068	34.7064	41.0602	157.386	40.4349	18.4646	64.229	15.4328	30.8036	22.495	43.7177	46.4709	20.3964	48.7235	31.6776	13.276	38.0722	39.6223	15.2496	41.996	57.6546	173.719	44.8152	30.2511	16.0349	59.8636
Cp300	Positive	222.057	9.84	3.32658	3.78646	0.919159	0.236475	NA	0.447952	2.63581	0.576249	5.56397	3.40783	4.93253	1.16638	2.20998	1.91458	7.09165	0.840243	0.492588	0.346657	0.234166	0.0562412	4.55645	1.37602	1.30032	10.8685	1.39986	0.543006	2.61452	0.453537	2.15981	0.641333	1.39791	1.87266	0.626405	3.1457	0.916621	0.506435	1.58564	1.23265	0.718292	1.96792	2.13678	10.9839	1.39701	0.716129	0.491228	5.72704
Cp1506	Positive	222.057	11.45	0.764515	0.65916	0.30777	0.195883	0.0380874	NA	0.0734933	NA	0.293365	0.521191	0.202153	0.193451	0.448955	0.249686	0.397479	NA	0.171944	0.113254	0.00426014	0.0507512	NA	0.260259	NA	0.533173	0.0758158	NA	0.198332	0.0741911	0.633875	0.178284	NA	0.16365	0.162216	0.517273	NA	NA	NA	0.157672	NA	0.277353	0.524584	0.304131	NA	0.12116	NA	1.08801
Cp1532	Positive	222.058	10.69	0.59254	0.562758	0.216626	0.0694603	NA	NA	NA	0.0810293	0.407577	NA	0.207019	0.0533268	0.236235	0.123954	0.42197	NA	0.0838939	0.0125058	NA	NA	0.389112	0.125222	0.124724	0.683572	0.133655	NA	0.166187	NA	0.46232	NA	0.0274982	NA	NA	0.189267	0.0217221	NA	NA	0.0452477	NA	0.130685	0.298889	0.617668	0.0501968	NA	0.0133259	1.0964
Cp425	Positive	222.09	8.36	2.58214	1.68662	1.24396	0.627687	1.5021	0.936212	5.29475	1.32727	1.29741	2.8021	1.65616	6.13953	1.31778	4.90547	10.371	1.50856	1.15835	1.05084	1.13036	1.7203	2.26948	4.44578	2.03475	5.54769	1.70651	1.08118	2.93504	0.225223	0.935378	0.663958	2.93978	3.3383	1.12698	1.5123	3.99989	1.1711	2.19966	5.16967	1.22056	2.61371	2.40961	2.6787	6.39605	2.3662	1.88117	4.59147
Cp1291	Positive	222.092	9.05	0.759644	0.953172	0.811276	0.401388	0.132022	0.481811	1.3779	0.505608	0.722669	1.31442	0.837187	1.87211	0.679888	0.773621	1.28264	0.512233	0.569247	0.45582	0.683185	0.406254	1.44951	1.6043	1.62469	0.747173	0.812479	1.15146	1.41173	0.380229	0.884985	0.681027	1.15777	1.06774	0.662657	1.02269	1.01109	0.630642	1.06835	1.10633	0.777113	0.933326	1.28741	1.16445	1.65901	1.01517	0.652967	1.2303
Cp1758	Positive	223.063	8.39	0.495555	0.263252	0.40621	0.394641	0.402271	0.553692	0.163519	0.426045	0.302388	0.521511	0.246701	0.25316	0.344566	0.457838	0.17539	0.36096	0.392069	0.381837	0.360834	0.312193	0.286921	0.295245	0.551297	0.451849	0.232528	0.361959	0.276199	0.4634	0.427423	0.331776	0.0800843	0.385388	0.673559	0.446563	0.330125	0.536986	0.302182	0.77755	0.452617	0.589074	0.546945	0.288045	0.505315	0.441996	0.399645	0.984623
Cp1452	Positive	224.034	6.79	NA	0.357731	NA	0.0937936	0.130952	NA	1.08819	0.217545	0.909658	1.05791	0.888474	0.885991	0.712646	0.898706	0.841354	0.671852	NA	NA	0.200937	NA	1.10079	0.826054	0.792831	1.42214	0.879567	0.294771	1.18703	NA	0.538336	NA	0.806101	0.797983	NA	NA	NA	NA	0.741719	1.00518	0.485106	0.690907	0.843743	1.63912	0.732734	0.697718	NA	0.391026
Cp1312	Positive	224.035	6.28	NA	0.522247	NA	NA	0.152991	NA	1.92555	0.39818	1.24992	1.89598	1.34394	1.33416	1.09948	1.40745	0.886532	1.10385	0.395918	0.269518	0.424026	0.253146	1.60903	1.51596	1.34372	1.79019	1.45769	0.477829	1.97334	0.5292	1.02347	0.275554	1.3198	1.37736	NA	0.597581	0.864716	0.364484	1.1489	1.64915	0.664581	1.41505	1.63263	1.95879	1.46143	1.45811	0.302706	0.627549
Cp1546	Positive	224.056	9.84	0.555192	0.572645	NA	NA	NA	NA	0.442381	0.206545	0.90111	0.569547	0.702169	0.283653	0.478314	0.333399	1.08778	NA	0.235673	0.226624	NA	NA	0.593088	NA	NA	1.43309	0.313684	0.175012	0.565817	NA	NA	0.240331	0.229845	0.319547	NA	0.44501	NA	0.186378	NA	NA	0.18275	0.386965	0.360823	1.38693	0.305782	0.243944	0.200149	0.764758
Cp985	Positive	224.068	4.13	0.475331	2.64955	0.927601	2.67865	0.929396	1.31483	2.62961	1.0865	0.196843	0.225609	0.101076	NA	0.629461	1.50636	0.850785	0.286393	0.59403	0.148083	0.478414	0.841544	1.78834	0.915181	0.762946	1.20827	0.677131	1.53098	0.982612	0.368895	0.24208	1.33117	0.916861	0.807505	0.430563	0.732933	0.306382	0.174771	0.459326	0.838241	0.210654	2.18375	0.763149	0.843006	0.876911	0.732509	0.391806	0.133521
Cp1472	Positive	224.069	3.69	1.00986	2.22178	1.28588	2.11489	0.846267	1.72785	1.96637	1.9381	0.51051	1.01132	0.382218	0.574256	0.668607	1.68073	1.82129	0.532667	2.18494	0.424029	1.21868	1.53657	2.05805	2.76581	0.828037	2.4288	1.79795	2.52111	2.37656	0.609721	0.784443	1.36815	1.46858	1.9906	0.796765	1.71921	1.20015	0.79474	1.03983	1.78644	0.784711	3.30235	1.22226	1.56919	1.35462	1.53013	0.786487	0.216813
Cp1695	Positive	224.086	9.67	0.11219	0.109585	NA	NA	NA	NA	0.588076	0.126738	0.773364	0.518629	0.271159	0.253444	NA	0.215748	0.207334	NA	0.0286317	0.110215	0.0478556	0.00146398	0.313892	0.758931	0.245491	0.0663371	0.32593	0.059276	0.0042132	0.159275	NA	NA	0.488284	0.135627	0.214625	0.0200417	0.035993	NA	NA	0.278745	0.152619	0.123897	0.274759	0.164266	0.418168	NA	0.197275	0.237159
Cp1264	Positive	225.173	12.34	2.85819	3.83864	0.031335	0.524381	0.255378	2.16385	1.52915	0.113417	1.84175	NA	NA	1.11887	0.233924	5.71061	1.47051	NA	2.07687	1.23726	4.35983	NA	2.9592	0.765896	1.32079	0.371175	NA	0.64466	NA	1.97946	1.59524	0.29452	1.3599	0.227043	NA	NA	1.16756	1.63791	0.120128	0.0847816	1.32549	3.74363	3.58699	0.368883	1.20068	2.10425	0.110265	1.13862
Cp992	Positive	225.173	12.51	1.2425	1.13485	NA	0.68122	0.304057	1.36898	1.18416	0.0702743	1.02173	0.416792	0.249696	0.913221	0.624703	2.09526	0.687869	0.385245	1.49808	0.707923	1.86069	0.0248876	1.67775	0.791384	1.08294	0.65881	NA	0.408763	NA	1.06399	0.62387	0.0742397	1.5067	NA	0.218828	NA	0.139678	1.17377	0.646851	0.647058	1.43816	2.24796	2.14837	NA	0.754347	0.876682	0.286767	0.17256
Cp981	Positive	225.208	10.37	1.81954	1.94644	0.282587	NA	1.30342	2.14665	1.26204	1.24343	0.498519	2.41893	1.33583	2.67074	NA	2.34365	NA	1.14343	3.18227	0.548269	0.903292	NA	1.75907	0.874021	0.567672	0.9325	1.10272	0.880557	0.475779	1.13539	NA	NA	0.571326	2.02108	NA	NA	2.10287	NA	1.18126	2.44847	0.468338	NA	1.2784	0.44495	0.73134	2.07041	1.28033	NA
Cp191	Positive	225.208	10.27	9.48905	12.1392	2.45343	3.89697	9.2655	13.1578	7.24936	6.19917	2.15305	13.3436	9.59202	16.6704	1.46457	10.5282	5.40757	6.55312	21.6106	4.38873	6.06431	0.975742	10.047	4.55533	1.21081	4.0841	6.53579	5.7715	NA	7.20434	0.845451	1.17984	3.01045	11.6729	1.0856	15.8568	12.8129	6.19168	5.96576	16.4047	4.01722	3.23871	6.08991	1.57314	1.73179	10.3587	6.04889	5.10305
Cp253	Positive	226.014	4.23	2.83471	7.59063	5.04951	2.21001	2.04923	2.41711	11.575	4.18114	5.90767	8.91004	6.76201	4.81629	4.70458	8.77342	8.68233	5.24515	4.06785	2.39551	3.81893	2.09142	11.501	8.62876	8.41929	12.8953	7.51227	5.71249	7.55676	2.49541	4.14563	3.35582	8.13343	7.21504	3.29976	5.99882	6.5016	3.53784	5.02348	8.0629	3.04387	7.35968	10.1021	14.1182	9.43589	7.47197	3.3103	2.48057
Cp207	Positive	226.015	5.12	0.667973	5.47748	4.68694	1.28734	3.39994	5.43105	17.1458	5.43789	8.19962	3.40239	8.28714	1.05703	1.60294	12.4728	15.8908	5.58247	6.41657	1.2507	5.94162	3.83941	6.52003	4.87701	3.23232	20.0655	9.07588	9.05528	2.08226	3.03771	1.05678	5.78961	8.24441	3.75063	5.53191	3.63347	6.12992	3.17842	1.50625	9.42403	0.712528	2.76165	6.58505	19.3382	8.71487	5.69018	4.41217	0.505981
Cp731	Positive	226.048	3.01	1.0971	1.14199	0.470597	0.359689	0.466998	2.45635	2.73527	0.535429	0.866443	1.15302	1.236	1.30636	0.758724	0.935553	1.29147	0.670996	1.90277	0.653575	1.80559	2.07726	1.50589	1.81596	2.10544	0.95661	1.39777	3.34105	2.01453	0.372869	1.01127	0.993701	1.56882	0.743296	0.269923	1.84144	0.973705	0.836498	0.829952	1.28083	0.415805	1.07617	0.91935	1.41692	1.73193	0.863957	1.20299	0.562569
Cp1331	Positive	226.083	8.93	1.99344	1.15449	0.28273	NA	0.0360546	NA	0.462917	0.32204	0.250031	0.871533	0.355265	0.722465	0.314526	NA	0.409344	0.354113	0.247525	0.357293	NA	0.66855	1.44463	4.95727	2.27888	NA	NA	NA	2.36173	NA	0.782369	0.25862	NA	1.7607	NA	0.587278	0.554166	NA	1.38845	0.369086	0.968247	2.80521	2.12842	0.749627	1.28253	1.35293	0.14162	0.544639
Cp167	Positive	226.084	10.57	17.5282	12.0795	2.97926	3.05681	2.75277	1.37368	10.3834	6.38372	4.57097	12.5473	4.79601	7.82017	3.71139	5.34569	4.99519	5.15967	7.51443	4.14317	7.44687	8.86036	20.6674	43.5754	9.07607	9.20379	15.4931	3.52893	22.6982	3.49007	3.80667	3.64181	4.72793	20.7837	3.31841	2.21574	10.4099	4.09537	19.1409	10.3498	11.148	28.6427	21.8712	10.9369	23.0716	22.1939	4.65673	4.45579
Cp251	Positive	226.084	10.57	17.74	11.9871	2.84233	2.95439	2.72902	1.24712	10.0971	6.51265	4.58961	12.5155	4.51387	7.68884	3.75706	5.45543	5.23158	5.0927	7.37712	4.24298	7.52881	8.92136	20.6853	43.5127	8.9755	9.35875	15.3261	3.54664	22.8338	3.18418	3.68453	3.19935	4.9924	20.5357	3.24998	2.15702	10.236	3.99638	19.512	10.0665	11.0883	28.1643	22.4651	10.978	23.0396	21.9413	4.59089	4.46876
Cp1491	Positive	226.085	10.04	0.923353	0.418154	NA	NA	NA	NA	0.215055	0.158881	0.113025	0.581236	NA	0.394703	NA	NA	NA	0.153092	NA	NA	NA	0.144446	0.966478	1.72635	0.488253	0.251273	0.51091	NA	1.09543	NA	NA	NA	0.17452	1.0238	0.0713227	NA	0.386198	NA	0.948218	0.241836	0.627245	1.25085	0.804009	0.286001	0.744029	0.800873	NA	NA
Cp432	Positive	226.12	11.07	7.86378	5.63128	4.87066	2.9326	3.04817	2.92848	8.27103	3.16014	4.54437	7.75093	5.16925	6.61862	6.61362	7.65169	7.58405	4.68766	2.94337	3.50257	3.65009	2.8428	8.06211	8.81145	7.04828	8.7002	6.7506	4.37154	9.86201	2.46155	6.50738	2.89846	7.68009	4.64465	2.99135	6.69562	7.13545	6.47919	6.80514	7.01401	5.20267	7.6714	8.02432	8.60892	8.43767	8.12312	3.69113	7.29801
Cp463	Positive	226.192	9.63	5.43117	4.42557	3.85749	2.79368	2.0947	2.39844	6.08199	2.83969	2.57926	5.81059	3.15758	6.03117	4.85001	5.8963	3.73004	3.3859	2.5396	2.23562	3.2326	2.31626	5.94795	6.78067	6.73524	4.66471	4.77053	5.36166	6.85253	1.60306	5.40606	2.30224	5.51705	5.82489	2.13351	4.82116	4.53032	4.8218	4.97285	4.40957	4.67827	4.71797	6.46698	5.63236	5.23218	5.37137	2.50056	4.95491
Cp241	Positive	227.024	5.14	0.911395	1.27698	1.5719	0.584219	0.558793	1.64509	1.52334	0.594459	2.58104	4.46639	0.580877	2.41715	0.733714	1.6337	2.56148	0.416912	2.34687	1.5471	1.08889	0.911692	2.24238	15.5519	1.35627	5.10822	1.45235	4.22509	2.67054	0.787986	1.33889	0.940324	1.02477	2.69513	1.61783	0.942242	1.2422	1.02061	2.74012	3.68329	4.68416	3.03136	6.97065	4.48944	5.23902	3.71033	1.30228	1.05456
Cp573	Positive	227.024	5.13	1.01384	2.85128	2.47117	0.999101	1.54543	2.74979	5.77213	2.18107	4.00299	3.68852	2.81803	1.9009	0.905793	4.61975	6.40987	1.84438	3.5454	1.30867	2.71669	1.86828	3.53088	7.93394	2.08142	8.71102	3.47241	5.36019	2.02561	1.59938	1.29764	2.55978	3.1017	2.66697	2.85186	1.95477	2.77992	1.80054	1.88456	5.04257	2.82732	2.8557	5.14498	8.76282	5.03572	3.73334	2.20922	0.898534
Cp376	Positive	227.042	1.94	2.53682	2.99959	3.43626	3.67111	2.49782	4.28819	5.54067	2.733	2.09179	3.97674	2.34347	6.73549	4.83928	8.84695	11.9358	2.29521	7.67544	5.5056	4.41961	4.90067	11.2795	8.30375	5.69965	9.25058	7.15378	10.6083	6.66715	1.809	2.26914	3.87428	6.99341	5.21763	4.8728	3.60412	6.50602	2.43825	7.061	5.45845	5.92385	6.3695	7.56907	5.61832	6.5069	7.9516	5.02529	4.77459
Cp172	Positive	227.042	2.16	3.73238	3.85842	3.726	6.40351	2.94942	8.25541	8.2988	5.65739	1.34656	5.56385	0.00574014	3.29208	3.36179	13.8972	14.974	3.06195	13.7221	5.36652	7.31268	11.477	9.10856	12.8174	3.22263	12.0339	11.7772	22.9491	7.70734	2.5855	2.17824	5.86751	7.07711	4.38904	4.91837	4.11193	5.55062	4.40529	7.40927	5.74584	6.52319	13.3473	10.3998	1.45304	13.1945	16.1477	3.53266	4.31489
Cp1563	Positive	227.057	4.35	0.274718	0.418292	0.275147	0.206722	0.541033	0.116623	0.279249	0.47921	0.352133	1.05151	0.236718	0.358679	0.140001	0.302855	0.721486	0.515015	0.243831	0.377863	0.214853	0.284988	0.601897	1.49253	NA	1.06387	0.525369	0.100179	0.389331	0.170757	0.320415	0.373772	0.167728	0.709288	0.734374	NA	0.682351	0.605427	0.704703	0.429776	0.41515	0.404503	1.3294	0.662654	0.836893	1.24652	0.448376	0.37246
Cp36	Positive	227.188	8.51	9.22349	8.82354	10.924	8.2764	13.5914	27.6169	3.7625	18.6668	3.58877	1.96916	2.36806	8.22523	1.61925	2.54938	NA	6.69455	44.1471	23.5517	76.7314	8.47253	4.17953	5.83224	6.80443	NA	0.0264443	3.67136	0.927216	55.3847	2.44826	21.9229	4.07017	0.0311521	7.22447	5.05799	4.47248	35.7794	4.47709	7.92051	5.30132	NA	9.23259	2.84433	NA	4.33996	12.3559	9.95152
Cp1535	Positive	227.189	12.34	1.36281	1.10464	0.363142	0.74338	0.328985	0.526418	0.671773	0.58126	0.0954535	NA	NA	NA	0.469071	0.719482	0.502744	0.12977	0.844173	0.47078	1.76427	0.246924	1.07978	0.743891	0.475971	0.533825	NA	NA	0.0564881	0.500348	0.334813	0.046603	0.185804	0.137532	NA	NA	0.22985	0.264958	0.230478	NA	0.30812	0.334068	1.29175	0.0925617	0.368528	0.684993	0.0449421	0.645479
Cp1708	Positive	227.223	11.39	NA	0.36089	0.523681	0.130072	0.170751	0.282019	0.565343	NA	0.127865	NA	NA	0.550996	0.279186	0.578721	0.573325	0.347694	0.252605	0.323165	NA	0.29365	0.713575	0.483474	0.688303	0.558587	0.215593	0.231605	0.459083	0.149118	0.267338	0.174219	0.234227	0.531898	0.310116	0.453337	0.640423	0.293775	NA	0.479348	0.197946	0.352172	0.406348	0.261599	0.518561	0.290513	0.305972	0.836351
Cp1773	Positive	227.223	11.28	0.0845853	0.0585004	0.436973	0.287353	NA	0.026603	0.347188	NA	0.0505761	0.607015	0.0274528	0.50859	NA	0.17777	NA	0.125705	NA	0.00935015	NA	NA	0.256697	0.176039	0.0989333	NA	0.0841529	NA	0.231882	0.364184	0.0333105	NA	0.369198	0.069514	NA	0.038672	0.30032	NA	0.175768	0.199831	NA	0.197867	0.0374818	0.081656	0.235089	0.0871809	NA	0.123475
Cp1761	Positive	227.223	11.05	NA	0.213128	0.0961512	NA	0.126566	0.155453	0.0635478	NA	NA	0.142987	NA	0.299538	NA	0.243544	0.284153	NA	0.144544	NA	0.0671682	0.0736869	0.233657	0.366959	0.0934749	0.115732	0.142252	0.0643721	0.394792	0.162808	0.0325784	0.0610987	0.275639	0.124472	0.0555607	NA	0.175418	NA	0.238975	0.44352	0.0235806	NA	NA	0.0711593	0.219332	0.0152973	0.132213	0.288533
Cp1771	Positive	227.223	10.8	0.314427	NA	0.17456	NA	0.355518	0.396224	0.421327	NA	NA	0.392774	0.24458	0.620775	NA	0.588902	0.330244	0.307789	0.690239	0.328658	0.406844	NA	NA	0.483949	NA	0.357491	0.280075	0.297453	0.225172	0.291907	0.181804	NA	0.220971	0.452861	NA	0.504288	0.442272	0.526847	0.431855	0.382212	0.26109	0.27014	0.548393	0.37011	0.605569	0.449712	NA	0.326682
Cp130	Positive	227.224	10.91	11.8374	13.999	9.54315	6.96594	15.4961	19.1476	10.6994	9.71154	5.28319	17.4116	7.86387	15.1044	3.523	12.4595	10.6936	8.16	30.7059	10.9271	17.9095	3.52148	10.1207	8.88237	4.95526	4.96903	8.37152	8.87034	3.34528	17.516	4.1388	6.21216	5.57533	11.0893	6.35691	18.2583	13.5049	17.5298	11.5326	19.1497	7.82916	7.23126	15.6759	6.54761	6.6858	13.5815	11.3916	9.9093
Cp1402	Positive	228.012	4.24	0.455698	1.0747	0.671341	NA	0.32278	0.449027	1.51843	0.608636	0.804588	1.13349	0.864515	0.710693	0.859987	1.18588	1.38684	0.720529	0.57679	0.364305	0.533938	0.452979	1.4548	1.12462	1.17737	1.62246	1.00918	0.876534	1.01975	0.443822	0.511371	0.54176	0.998041	1.14446	0.471544	0.874495	0.872546	NA	0.865339	1.13336	0.432443	1.15962	1.27824	1.79071	1.26161	1.05321	0.555375	0.524802
Cp1661	Positive	228.062	5.18	0.874491	0.664653	0.361425	0.67757	0.836959	1.08817	1.58056	0.881056	0.706522	1.16247	0.501014	0.314997	0.626063	1.21223	1.27002	0.65206	2.14568	0.664796	1.08946	1.33198	1.63167	2.68871	1.61364	1.51194	1.94008	1.51717	0.781626	0.163544	0.45927	0.708799	0.766881	1.60712	0.733586	0.465052	0.954635	0.704953	1.1191	0.862178	NA	1.52212	2.08273	1.54533	1.48708	1.78667	0.727174	0.694946
Cp337	Positive	228.208	11.67	4.42309	3.26998	3.18787	2.36685	1.51119	1.20426	4.9619	1.88262	2.85482	4.44541	2.73318	4.55121	3.99832	5.40436	6.01376	2.87484	2.54545	2.20967	2.28003	1.70993	5.33657	5.58607	3.55573	5.38178	3.45405	1.78257	7.41117	0.881314	3.75945	1.05331	4.69463	3.83034	2.29888	4.90598	4.5355	3.58894	3.98424	4.18966	3.76766	4.05676	4.41658	4.44296	5.14504	4.65863	1.9346	4.92833
Cp667	Positive	230.079	7.07	2.51453	2.04298	1.13679	1.2181	1.12946	2.28974	3.66511	1.75612	1.01164	1.79238	1.04009	1.18312	0.583655	2.48619	2.17465	1.09272	3.81633	0.891186	2.91664	3.01055	2.86691	6.36052	5.62582	2.27188	3.29929	3.66653	2.31258	0.658004	0.862778	1.28741	1.69645	4.28252	1.46809	0.824391	1.67487	1.21966	2.30652	1.38121	1.93479	3.43488	3.21507	3.20912	3.21706	3.35389	0.918308	0.509669
Cp976	Positive	230.079	6.26	0.969852	0.811316	0.758908	0.425389	0.835568	0.853716	2.33926	0.775584	0.400454	0.654731	0.246951	0.496251	NA	1.22936	0.990428	0.427396	1.61338	0.170991	1.31837	0.866919	1.1241	3.14939	1.75487	1.03025	1.60307	0.549979	1.07655	NA	0.16277	0.453973	0.827136	1.65446	0.423995	NA	0.95413	0.482287	1.08208	0.773226	0.625018	2.10355	1.87522	1.29205	1.537	2.23259	0.512131	0.408066
Cp1349	Positive	230.079	7.93	0.574678	0.549849	0.159537	NA	0.404411	0.575593	1.15071	0.62538	0.435833	0.660495	0.537452	0.345773	NA	0.491775	0.737002	0.349727	1.68049	0.183614	1.63263	1.3715	1.03587	2.23468	0.505037	1.05683	1.49248	1.61346	0.663501	0.259816	0.205354	0.635508	0.45498	1.15453	0.575047	NA	0.708999	NA	0.647898	0.858162	0.519429	1.24491	1.48994	1.04408	1.7983	1.47165	0.51187	NA
Cp1762	Positive	230.152	9.74	NA	0.271766	NA	NA	NA	NA	0.432693	NA	0.605251	0.463547	NA	0.689844	0.340216	NA	NA	0.350689	NA	NA	NA	NA	0.548091	NA	0.430667	0.457974	0.584641	NA	NA	NA	0.324564	NA	0.419922	0.376137	NA	NA	0.434947	NA	NA	0.638719	NA	NA	0.460721	0.574046	0.583678	0.336946	NA	NA
Cp655	Positive	230.161	3.04	3.69828	1.3863	NA	NA	NA	NA	0.467567	0.637724	NA	0.7207	NA	0.987113	1.06142	NA	NA	NA	0.426704	NA	NA	NA	1.04495	NA	0.90541	NA	NA	0.18279	NA	NA	1.51996	NA	NA	NA	NA	0.916131	0.294132	NA	1.16205	NA	0.724973	0.984667	NA	NA	NA	NA	NA	4.89094
Cp821	Positive	231.023	7.06	0.863567	1.1019	0.477608	0.532013	0.35969	1.29011	1.35233	0.977974	0.368992	1.40409	0.722384	0.599501	0.441479	1.16181	1.07546	0.657409	1.85459	0.363955	1.3178	1.73847	1.07734	2.72892	1.12129	1.26836	2.12857	2.51682	1.43077	0.441761	0.954412	0.573596	0.936909	1.28717	0.925487	1.07336	0.89692	1.09799	1.30418	1.39187	1.30086	1.83172	2.14435	1.96656	1.60853	0.855022	0.357708	0.538027
Cp1780	Positive	232.107	7.3	0.533345	0.348943	0.338818	0.363008	0.191507	0.395552	0.32691	0.287086	0.256442	0.579955	NA	0.612265	0.645636	0.453151	NA	0.235041	NA	0.349228	0.220533	NA	0.561644	0.629118	0.638631	0.523138	0.524718	NA	0.534452	0.135575	NA	0.288153	0.400312	NA	0.248513	0.391377	0.36334	0.202521	0.405198	0.341134	0.576939	0.332371	0.477933	0.547736	0.670685	0.385816	NA	0.450411
Cp1837	Positive	232.978	3.4	NA	NA	0.452139	0.192564	0.426236	NA	NA	NA	0.270096	NA	NA	NA	NA	1.51993	0.997425	NA	0.509059	NA	NA	0.678676	1.15812	0.394188	NA	0.456671	0.915912	NA	NA	NA	NA	0.381765	0.407104	0.505099	NA	NA	NA	0.278699	0.370045	NA	0.302225	0.89924	0.912272	0.631982	NA	0.80358	NA	NA
Cp525	Positive	234.062	9.43	4.28905	2.43079	2.12377	2.02641	1.101	1.49877	2.56116	1.45999	2.05641	2.50828	2.27846	3.80038	2.2793	2.35658	2.60118	1.44149	1.43358	2.12283	1.60536	1.33783	2.96598	3.39746	2.60529	2.6905	2.4562	1.9081	4.57397	1.10138	3.30359	1.3649	2.00758	2.6633	1.40097	2.5563	2.10856	1.78293	2.70159	2.44677	2.51841	2.84425	3.84599	2.96143	2.3877	2.17776	1.55677	3.6787
Cp55	Positive	234.111	9.06	28.5829	23.7079	19.9964	10.9044	9.67034	12.298	39.3597	12.5219	27.0542	35.6694	29.2907	32.4259	29.4485	38.353	37.0413	22.6516	15.6294	12.1268	15.7152	11.1663	44.6872	39.9751	34.2515	48.0082	30.1498	21.8643	48.5975	8.93973	26.0405	14.2559	32.3467	32.7559	11.7228	28.6351	28.6172	17.676	33.1852	31.0758	20.5881	31.9779	40.2899	46.2499	40.1307	31.1711	14.9294	28.8249
Cp1397	Positive	234.995	5.97	2.6964	1.35004	1.21963	0.665846	1.07276	0.716804	1.29873	0.834492	0.877484	1.49632	0.669225	1.3265	0.955813	1.14128	1.28918	0.619109	1.51517	0.971714	1.13178	0.748337	1.43962	2.24196	1.45657	1.16123	1.30919	1.4422	2.0796	1.46218	1.61318	1.30218	1.49432	1.28431	0.786782	1.71399	0.983682	0.7834	1.17334	0.789133	1.04934	1.33373	2.0948	0.679422	0.994734	0.846764	0.957763	1.62031
Cp1747	Positive	235.056	3.58	0.475331	0.448503	0.321935	0.15164	0.288116	NA	0.531115	0.400747	0.156952	0.674425	NA	0.615244	NA	0.603932	0.587016	0.126989	0.711482	0.559723	0.479124	0.816168	0.732008	0.716662	0.710409	0.549855	0.55976	0.541396	0.794422	0.161925	NA	0.310913	0.436465	0.655962	0.40981	NA	NA	0.627173	0.423357	0.870671	NA	0.665732	0.767814	0.551417	0.745981	0.788283	NA	0.447868
Cp1488	Positive	235.156	8.47	0.999819	0.762291	0.65503	0.604017	0.355197	NA	1.04996	NA	0.643124	1.25502	0.864016	1.15036	NA	0.998742	NA	0.68929	NA	0.413627	NA	0.310119	0.922566	1.44741	1.14353	0.75786	NA	0.617302	1.29907	NA	1.49348	NA	1.32922	1.18378	0.355957	1.05162	NA	0.75098	0.845667	0.965027	1.25645	1.19286	1.81779	0.849822	1.26078	1.07325	NA	0.626913
Cp1776	Positive	235.213	8.01	0.611435	NA	0.417371	NA	0.260727	0.374189	0.484229	0.332672	0.275082	0.527435	0.429138	0.532275	0.378139	0.671646	0.46441	0.373798	0.354202	0.20395	0.340385	0.28328	0.606776	0.605688	0.539562	0.413532	0.406044	NA	0.547716	0.349464	NA	0.42742	0.496172	0.540196	0.329424	0.473238	0.552777	NA	0.42778	NA	0.508818	0.664883	0.636869	0.618214	0.721301	0.534592	0.377827	NA
Cp1548	Positive	236.014	5.72	1.30199	1.39289	0.698813	0.431251	0.21483	0.405226	0.921185	0.674266	1.11078	1.35974	0.962846	1.02881	1.10343	0.827598	1.46001	0.805687	0.392069	0.564165	0.426866	0.194465	1.12898	0.858982	1.03232	1.27461	1.09516	0.777696	1.56747	0.870273	1.07765	0.832623	1.04329	1.25207	0.714671	1.17018	0.912201	0.685475	1.02341	1.35836	1.01685	1.31209	1.43074	1.79302	1.22383	1.02031	0.713325	1.14358
Cp1314	Positive	236.106	9.17	0.9049	0.628262	0.443841	0.343983	1.08324	0.764233	0.545065	0.797094	0.232223	0.437768	0.312713	0.130197	0.464994	1.52058	0.855196	0.406962	0.73919	0.288335	0.381425	0.682946	1.83917	1.38694	0.997657	1.25858	1.21696	1.90206	0.643059	0.11953	0.394601	0.553004	0.758336	1.74003	0.528812	0.884798	0.301331	0.48749	0.599242	0.676245	0.251658	0.948601	0.768457	0.787933	0.985392	0.582244	0.331579	0.558627
Cp911	Positive	236.109	9.07	2.02695	1.80816	1.43282	0.665846	0.773409	0.817573	2.71822	0.837181	1.9752	2.48218	2.17252	2.05436	1.9997	2.29905	2.30228	1.45411	0.966396	0.942495	0.944899	0.742847	2.79006	2.61209	2.32609	3.13609	2.11672	1.43268	3.12011	0.665953	1.79486	1.09395	2.21201	2.21016	1.53797	2.31383	1.92746	0.855442	2.15729	2.26223	1.3103	2.48175	2.42441	2.38125	2.8668	2.0562	1.29783	1.93008
Cp1551	Positive	236.212	11.12	0.412298	0.199808	NA	0.0882633	0.241042	1.08333	0.472088	0.516485	0.0930791	1.0142	0.345282	0.766005	NA	0.532016	0.425621	0.322553	1.626	0.122604	0.400453	NA	0.4192	0.0522418	NA	0.106218	0.533185	NA	NA	0.81831	NA	NA	0.0809607	0.956736	NA	1.45203	0.718976	0.935223	0.615305	0.485525	0.228994	0.079769	0.586196	0.176262	0.136508	0.927583	0.168402	0.0883783
Cp1704	Positive	236.213	10.87	0.619702	0.406344	0.419946	0.210925	0.199103	0.292633	0.778332	0.505975	0.351065	0.80076	0.369116	0.698354	0.630548	0.765702	0.742631	0.348764	0.32634	0.245675	0.348622	0.274008	0.767924	1.1099	0.481703	0.688395	0.640396	0.362898	0.952963	0.229639	0.439747	0.232609	0.645823	0.631884	0.260991	0.680712	0.562627	0.571006	0.678629	0.533244	0.474495	0.588084	0.565123	0.678331	0.860736	0.553138	0.212952	0.614324
Cp63	Positive	237.063	3.97	13.1308	15.6633	5.88811	10.7295	7.34348	12.4796	20.4731	12.046	5.79298	27.2292	9.20931	9.34963	12.8021	29.1683	30.7095	9.46669	28.3006	11.1977	15.4396	28.9269	30.1023	31.9117	18.3877	25.3955	46.9138	31.605	13.7399	6.49157	3.60912	10.3036	11.6083	19.7043	9.69752	12.363	15.6061	10.1464	18.0549	12.9574	18.0611	32.8702	40.2387	24.7156	41.1021	42.4104	7.59796	13.3856
Cp301	Positive	237.19	11.4	9.98963	7.09942	6.28674	4.91697	3.40593	3.85677	8.2275	4.68247	2.46125	7.79816	4.00612	9.98445	6.66772	7.11482	5.04462	5.586	4.84999	5.01729	4.57426	4.04668	8.77366	11.6225	11.695	4.6522	7.2206	7.39475	12.2358	3.29856	10.275	3.41923	8.73521	8.99356	3.3389	6.6935	7.87059	5.98663	8.37868	8.11139	9.78098	10.4472	13.0131	5.29483	12.0252	10.072	4.54751	8.45392
Cp1040	Positive	237.979	5.73	1.61716	2.03845	1.21005	0.527036	0.430088	0.67475	2.15908	0.841703	1.72695	2.18676	2.2424	1.90076	1.75096	1.78174	2.31947	1.16162	1.06199	0.858578	0.877447	0.512026	2.34768	1.65052	2.22361	3.06037	1.60073	1.19893	2.26967	0.808006	1.51703	0.89914	1.50977	1.77131	0.921547	1.69762	1.48051	0.766323	1.52197	1.72636	0.952003	2.00314	2.39095	2.95461	1.78464	1.76176	0.854161	1.84297
Cp1850	Positive	238.048	4.72	0.264237	0.479539	0.348977	0.194776	0.396066	0.354707	NA	0.415902	NA	0.488046	NA	0.250466	NA	0.789459	1.19563	0.112011	0.527685	NA	0.494034	0.595107	0.390874	0.961249	0.275512	0.549204	0.518465	0.8477	0.329098	NA	0.173019	0.309151	0.475904	0.470954	0.346762	NA	0.301331	0.502566	0.423823	0.273494	NA	0.634899	0.731458	0.640434	0.381635	0.434009	NA	0.290949
Cp1220	Positive	238.07	5.97	0.646863	1.22521	1.13822	0.728449	0.737033	0.86648	1.82842	0.915521	0.923549	1.12981	0.816597	0.881452	0.487421	1.43541	1.04899	0.845592	0.980866	0.629966	0.931693	1.03906	1.33662	2.31526	1.14653	1.25845	1.44688	1.44515	0.890077	0.360209	0.697812	0.828423	1.63214	0.968979	0.692605	1.30652	1.52951	1.30624	0.974059	1.81871	1.02026	1.04209	2.06118	1.37656	1.6809	1.83838	0.780347	NA
Cp83	Positive	238.12	8.25	3.47833	3.80829	4.75161	0.532345	1.1071	1.0832	23.8193	1.95692	21.4337	27.6671	15.1449	34.0938	11.7065	19.4777	3.22577	11.7423	1.47653	0.893641	2.18574	1.61648	39.074	36.5759	10.6081	16.8571	9.52074	0.978054	39.096	8.79312	12.5449	0.795232	25.2649	13.911	2.74835	2.53979	15.1258	0.904805	13.2908	24.5465	9.48334	13.4494	33.3422	9.66799	10.2817	8.64674	0.887999	4.13801
Cp555	Positive	238.121	8.17	0.938262	0.66891	0.527544	0.196767	0.20028	0.494172	3.22906	0.344283	5.76995	3.39454	2.97851	4.65432	2.14256	3.32348	0.885468	1.91713	0.12053	0.326086	0.853022	0.407352	7.97646	4.71617	1.64748	2.8177	1.32117	0.070407	5.17256	1.11993	1.28068	0.156879	3.61935	1.51829	0.673559	0.567519	2.30848	0.394902	2.53409	3.70228	1.52855	1.70598	4.28209	1.85819	1.32812	1.71086	0.403826	0.702448
Cp834	Positive	238.142	3.02	1.47353	1.00796	1.3268	0.632443	0.88414	1.05324	1.14735	0.57906	3.11577	2.24328	0.941383	1.34466	0.788083	0.866869	1.00762	0.761824	1.43789	0.816619	1.14087	0.954758	2.21093	1.64862	1.55496	1.45837	0.955904	0.79513	1.77953	0.899567	1.32534	0.736301	1.00418	1.29016	0.949655	1.59585	1.10252	1.01927	0.988027	1.23003	0.797811	1.83469	1.67912	1.12383	1.3489	1.61867	1.47042	1.33814
Cp1746	Positive	238.153	8.83	0.394731	0.402911	0.275004	0.321973	NA	0.304188	0.742166	0.295641	0.217145	0.535922	0.379473	0.706438	0.478314	0.50632	0.343326	0.339349	0.124225	0.215053	0.265833	0.254366	0.716015	0.528592	0.765948	0.434254	0.426626	0.280153	0.628859	0.172818	0.805064	0.118269	0.625994	0.717314	NA	0.621433	0.334672	0.321525	0.543019	0.83716	0.670869	0.658802	0.862403	0.58945	0.72632	0.695146	0.191527	0.268314
Cp1783	Positive	239.059	8.91	0.368898	0.323812	NA	0.156839	NA	0.268046	0.547519	NA	NA	0.870252	0.319701	0.569434	NA	0.610881	NA	NA	NA	NA	NA	NA	NA	0.887952	0.757351	NA	0.403048	NA	0.547248	0.374194	0.475376	NA	NA	0.506323	0.255343	NA	0.509585	NA	0.351304	0.823416	0.298426	0.089528	0.833769	NA	0.692856	0.436717	0.197667	0.31778
Cp852	Positive	240.028	5.73	1.3882	1.22178	NA	0.368095	0.763566	1.29549	1.81111	1.29659	0.490802	0.942626	0.471315	0.504477	0.390644	NA	0.372684	0.448686	1.58983	NA	1.14356	1.70175	1.31642	2.7142	1.3152	1.65413	1.57025	1.13818	1.0405	NA	0.512347	NA	0.779042	1.76819	0.545362	0.284112	0.613649	0.569672	1.07044	0.822026	0.636284	1.6429	1.68025	1.27773	1.34332	0.984034	NA	0.444053
Cp768	Positive	240.064	5.02	1.05208	0.981187	1.47289	0.797798	1.02205	1.62856	3.34324	0.809315	0.770158	1.85051	0.966714	3.52354	1.33314	1.99732	2.35384	0.427396	2.34764	2.08812	1.68162	2.96846	2.60031	2.01717	2.52205	1.6815	1.48232	2.26536	2.93551	0.246568	0.729902	0.677369	1.44075	1.63678	0.79729	1.70129	2.23245	1.59842	1.15181	2.83563	1.24191	1.62169	2.93983	2.14514	3.69909	1.49128	1.89306	1.53371
Cp246	Positive	240.067	8.64	4.57262	4.41733	1.96652	0.643282	0.374775	1.71549	7.14228	0.883989	7.60482	5.68698	8.03195	2.56805	3.9918	5.4349	12.6442	3.20231	0.860336	0.289855	1.31837	0.362457	8.76634	2.60987	3.72944	12.4658	3.34801	1.52455	5.05163	1.03161	2.44606	2.24521	4.03489	4.46753	1.28355	3.63982	3.26791	0.921482	3.40001	3.77378	1.3175	3.58451	5.00696	15.5265	4.7086	2.71669	1.35871	5.0485
Cp1522	Positive	240.076	3.96	0.526555	0.619747	0.156818	0.411785	0.348671	0.543213	0.557335	0.582482	0.417669	1.00796	0.840431	0.304076	0.292235	1.24293	0.888814	0.255368	1.94418	0.364188	1.28344	1.35162	0.715608	1.50836	0.970501	0.859385	1.24796	2.00305	1.55405	0.409081	0.307481	0.339498	0.591046	1.0219	0.505432	0.706681	0.533075	1.03422	0.727052	0.925957	0.329998	1.16146	1.26167	0.953971	0.997244	0.956959	0.427081	0.668369
Cp1711	Positive	240.088	11.59	0.693363	0.728234	NA	0.236254	0.433511	0.475093	0.903748	0.445845	0.761966	1.24878	0.992171	0.578369	0.204565	0.614113	0.508372	0.693355	0.971476	0.257714	0.479834	0.592789	1.04942	0.920247	0.628397	0.392028	0.509607	0.522353	0.442698	0.214477	0.637292	0.314841	0.185695	0.696636	0.455782	0.305847	0.339597	0.452136	0.6841	0.635167	0.659996	0.44566	0.962623	0.808654	0.930175	0.82876	0.176633	NA
Cp1079	Positive	240.199	6.37	1.47987	0.912524	3.09973	0.286911	0.643099	2.68933	0.662344	1.84082	2.66083	1.64507	1.33945	NA	NA	NA	0.686348	NA	NA	0.303997	0.642713	0.396372	0.495911	0.462261	NA	NA	NA	0.813637	0.407432	NA	0.203035	0.550159	0.227325	NA	0.550222	1.24484	0.352352	NA	0.478998	0.273185	0.218776	1.26414	0.352297	NA	0.44717	NA	0.496845	1.25891
Cp407	Positive	241.24	11.21	3.43655	4.40058	2.29776	2.12949	4.80703	5.84622	3.09382	2.72566	1.37505	5.77905	2.58593	5.09342	0.839598	3.46635	2.57243	2.60203	9.30375	3.34174	4.88979	0.726865	3.19381	2.05453	1.17069	1.35046	2.19657	2.1562	0.812679	5.7161	1.13512	1.69126	1.37074	3.27097	1.59576	5.76989	4.26056	4.21237	2.62605	5.29877	1.84518	1.6842	3.7929	1.46436	1.81531	4.35647	3.11734	1.96225
Cp1259	Positive	241.24	11.36	1.07038	1.14968	0.759194	0.571057	1.45053	1.74666	1.05254	0.930798	0.592073	1.74195	0.744222	1.15036	0.374061	0.84085	1.23001	0.645641	2.4554	0.99357	1.60536	0.315365	0.943573	0.786001	0.342377	0.557806	0.689246	0.743498	NA	1.85492	0.270388	0.547179	0.648234	0.981902	0.663445	1.56932	1.23488	1.58828	1.20884	1.54892	0.815497	0.519772	1.56185	0.605263	0.739148	1.13565	0.907334	0.506236
Cp1064	Positive	242.043	3.56	1.52962	1.65545	0.633281	0.39807	1.01156	0.92197	2.27648	1.33106	1.06067	2.39075	0.881611	0.825289	0.4968	1.70643	1.47264	0.435955	1.55258	0.744506	1.49219	1.8878	1.98839	2.69884	1.1464	1.4413	1.64671	1.67488	1.53158	0.318256	0.307237	0.964032	0.832066	1.24187	0.958062	1.14972	1.51549	0.930687	1.25412	1.76451	0.514189	2.46549	1.77226	1.96179	2.13434	2.49332	0.881728	0.786249
Cp651	Positive	242.174	2.5	5.47546	1.7671	0.884391	0.680888	0.998295	1.71482	1.49441	1.62279	0.608101	0.980575	0.937764	1.38891	0.86121	0.843598	2.64302	0.749521	1.59552	0.60215	1.99999	1.65259	2.23424	1.72635	NA	1.60565	0.658373	2.18208	2.65744	NA	1.33254	0.958749	1.02959	0.80152	1.5163	1.44441	0.699148	1.19444	2.26543	0.988655	1.08536	1.84629	1.49477	1.42019	1.09248	1.71478	1.13596	5.1501
Cp153	Positive	242.175	2.98	19.1796	4.03529	3.52955	1.87764	2.16049	2.63343	1.53613	2.62838	NA	2.07499	0.959726	3.6153	2.09947	1.91038	3.48635	1.22099	2.12829	1.34011	2.98863	2.14131	3.10761	3.01071	1.56205	1.79944	0.889467	3.10837	7.45112	0.767083	4.40064	1.68855	1.46551	3.00828	2.84975	3.66382	1.51562	2.472	5.69187	1.93021	1.95483	4.5474	2.0586	2.10043	1.98835	3.09099	2.0578	20.3562
Cp223	Positive	243.183	7.91	2.93775	3.44246	3.26113	3.21276	4.2553	9.48425	2.24807	6.94359	1.95466	1.83578	0.967713	3.32328	1.09595	1.48502	2.07775	2.63445	15.0189	7.70803	16.2722	1.56292	2.47427	3.04016	2.26209	1.30185	0.982348	1.81087	1.66546	11.4337	1.93896	3.62135	1.35004	2.1148	2.06586	3.86466	2.00361	9.79716	1.74953	3.15066	1.64999	2.84849	4.29191	1.34739	2.08247	2.8771	4.08555	3.10875
Cp499	Positive	243.184	12.34	2.66156	3.57512	NA	0.357588	0.0621594	1.98166	1.06481	0.208012	1.5047	NA	NA	0.758347	NA	5.4509	1.33604	NA	1.94849	0.700092	4.1951	NA	3.15993	0.396879	0.696354	0.547119	NA	0.414395	NA	2.38515	1.96385	0.105399	0.797775	NA	NA	NA	1.00881	1.60962	0.113842	NA	1.44811	3.47589	3.38494	0.161131	0.930594	1.00624	NA	0.539425
Cp616	Positive	243.184	12.51	1.258	1.83466	0.493776	0.37075	0.960743	2.09143	1.57023	NA	1.6455	0.206715	0.895212	0.982858	0.185263	3.14135	1.45575	0.18155	2.03362	0.870265	2.16089	0.00707589	2.29266	1.1642	0.865427	1.39894	NA	0.604025	NA	2.88094	1.21333	NA	2.0456	NA	0.559942	0.352564	NA	1.78199	0.705634	0.0626982	1.12611	3.30193	2.85827	1.09016	0.804683	2.0589	0.802818	0.510941
Cp606	Positive	243.219	9.39	10.8021	11.5139	15.241	10.4769	6.48084	7.23697	8.30978	8.396	7.08256	4.30611	8.35328	6.42318	12.0389	11.5308	6.16511	7.22989	8.38569	10.8951	12.0992	9.65347	6.50146	13.6805	10.5118	8.06589	6.81209	13.1134	10.9969	9.55387	7.15321	12.1368	11.1827	6.60437	11.9265	7.4747	4.68465	6.6657	5.23161	12.9588	10.2115	11.7939	10.3141	13.2534	8.54838	8.9864	8.84158	11.8137
Cp871	Positive	243.219	9.39	10.2437	10.0628	13.0843	9.27218	5.80062	6.848	7.64124	7.46044	6.34362	4.18634	7.66109	5.6464	10.6715	10.8553	5.45823	6.32289	7.68237	9.59045	10.8051	8.57318	6.28245	12.2642	9.35199	7.87653	6.46766	11.9055	9.42992	8.51563	6.55228	11.0067	10.4034	5.60043	11.0691	6.51214	4.39872	5.94634	4.38396	12.357	8.6461	10.6031	9.35388	11.8219	7.73422	8.04338	7.54283	11.0845
Cp296	Positive	243.22	9.39	11.3126	11.0637	15.3513	10.5034	6.61693	7.32551	8.80111	8.48669	7.09823	4.56486	8.70667	7.10693	11.5675	11.6559	6.25699	7.35378	8.16249	10.9893	12.2479	9.74424	7.81301	13.439	11.2956	8.78479	7.50472	12.8613	11.1172	9.61098	7.61663	12.7833	11.6716	6.72776	12.0429	7.72381	5.0303	7.13838	5.29703	13.6061	10.177	11.8656	11.2983	13.3804	8.28861	9.09253	8.69839	12.5109
Cp1009	Positive	244.025	4.23	0.859139	1.36721	1.07569	0.625696	0.545313	0.677168	2.48301	0.886556	1.55587	1.9453	1.39148	1.0715	1.11185	1.59201	1.94572	1.28272	0.880039	0.718208	0.907126	0.489457	2.75577	1.74757	1.81314	2.62573	1.35101	1.11176	1.58073	0.684648	0.818852	0.762447	1.81126	1.41708	0.722158	1.26164	1.3522	0.755516	1.14959	1.46754	0.844318	1.54956	2.39449	2.98746	2.10088	1.65359	0.657932	0.568037
Cp1295	Positive	244.104	8.72	1.12958	0.919802	1.0558	0.916478	1.02643	1.18894	1.23531	1.55239	1.22321	2.18083	1.20955	0.71126	0.972667	1.35056	1.0712	0.847196	1.40711	0.92286	1.31113	1.26939	1.34624	2.34661	0.582819	0.624794	1.46851	0.665983	0.945941	0.503439	0.306505	0.691323	0.983032	1.60902	0.994971	0.835541	0.780732	1.38936	0.74847	0.979235	1.35156	1.26131	2.12311	1.03944	0.980651	0.954793	1.36616	0.700032
Cp1415	Positive	244.105	8.61	0.737796	0.741005	1.02991	1.09223	0.9754	1.26969	0.927514	1.31309	1.32032	2.03801	0.971082	NA	1.15412	1.23194	0.753887	0.608197	1.22039	0.79488	1.08406	1.20644	0.894782	1.10325	NA	0.391246	1.2068	NA	0.506208	0.602361	0.274903	0.698368	0.488503	1.27247	1.06498	NA	0.71645	1.20885	NA	0.944952	1.29458	0.419636	1.25894	0.650522	0.630807	0.654127	1.5556	0.651837
Cp501	Positive	244.175	4.09	4.78711	1.89605	0.665904	1.1524	0.20381	0.164589	0.482033	0.867246	NA	0.957357	0.325815	1.23871	1.73248	NA	NA	NA	0.568169	0.540556	NA	NA	1.61527	1.8845	1.2527	0.40884	0.766234	NA	2.02296	0.296028	1.96495	NA	NA	0.542508	NA	1.37257	0.471698	0.614499	1.62883	NA	1.09087	1.43895	0.811087	0.431591	0.436712	0.643433	0.27122	6.61565
Cp1868	Positive	244.177	3.73	2.00215	NA	NA	NA	NA	NA	NA	NA	NA	NA	NA	NA	NA	NA	NA	NA	NA	NA	NA	NA	NA	NA	NA	NA	NA	NA	0.780222	NA	0.918295	NA	NA	NA	NA	NA	NA	0.246013	NA	NA	NA	NA	0.323823	NA	NA	NA	NA	2.80979
Cp1204	Positive	244.177	3.47	1.9124	0.412661	0.212477	0.366879	NA	NA	0.21273	0.358704	0.261904	NA	NA	0.316699	0.535266	NA	0.15668	0.0343415	NA	0.216573	NA	NA	0.388705	0.826845	0.319043	NA	0.319677	NA	0.580017	0.17429	0.8169	0.310506	0.360763	0.418852	NA	0.638935	NA	0.264291	0.485749	NA	0.372836	0.818057	0.212182	0.213887	0.241084	0.275621	0.229936	2.43619
Cp1846	Positive	244.183	11.02	0.408607	0.322164	0.249821	NA	NA	NA	NA	NA	0.301557	NA	0.267041	NA	0.30909	NA	NA	0.648636	NA	0.187003	NA	NA	1.21071	NA	0.952352	0.203052	0.704227	0.421369	0.604672	NA	0.787372	NA	0.460676	0.307168	NA	0.705552	NA	0.420517	0.469336	NA	0.49218	0.19815	0.493698	0.228882	NA	1.03588	NA	NA
Cp1462	Positive	246.047	6.21	NA	0.6571	0.767779	0.247093	0.325668	NA	0.897419	0.302118	NA	0.649287	0.123912	1.63313	1.63869	1.54223	NA	0.245846	0.432862	0.0808788	NA	0.271446	NA	2.00656	0.972548	1.23499	1.28704	0.942917	1.90187	NA	0.555419	0.200095	NA	1.77975	0.32023	1.40574	1.79056	0.783666	NA	1.9072	NA	1.01805	2.08692	NA	2.04092	NA	0.635069	0.877679
Cp293	Positive	246.065	6.42	1.06226	4.77465	6.47933	1.07022	1.89399	1.9216	3.62597	0.440834	0.70949	5.39396	0.808112	0.794796	0.981638	2.46405	2.83879	5.20824	2.59917	2.8823	0.558221	2.5461	4.71353	3.09841	3.98094	2.49657	4.07021	1.69634	5.03571	0.833325	0.363365	2.1157	1.10727	7.6162	2.72182	1.97425	1.63307	2.4704	7.73567	2.0136	7.94078	1.64517	11.6139	3.46609	6.00382	11.6338	0.998786	0.589273
Cp502	Positive	246.065	6.66	0.828582	1.42049	3.26785	1.09079	1.00461	1.00688	1.37597	0.57246	0.388819	1.96723	0.805367	0.465475	0.723112	2.73167	0.172347	1.81667	1.59799	1.00315	0.753193	2.52841	1.32496	0.455612	2.86634	1.01031	3.94724	1.27765	2.19835	0.456628	0.475742	0.605704	0.762061	3.56684	0.828026	0.953956	0.403121	1.00046	2.25763	1.43248	2.03239	1.1947	3.30982	0.546918	2.1692	2.56601	0.340071	0.347409
Cp590	Positive	246.071	9.56	3.85225	2.85018	2.28259	1.71682	1.31262	1.76158	4.47663	1.84094	1.3462	4.1327	1.92544	4.03369	2.57357	3.36486	2.85355	2.2292	1.20792	1.33263	1.71584	1.42201	3.7007	4.92355	3.72126	2.5027	2.75724	2.16746	5.17989	1.03985	3.84327	1.72716	4.56875	3.93795	1.34252	2.54558	3.3745	2.45119	2.8549	3.56422	3.30496	4.57272	4.6952	3.27905	4.99166	3.69571	1.72505	3.34668
Cp1137	Positive	246.109	6.99	1.12544	0.758446	0.48047	0.264237	0.576018	0.397299	2.53933	0.288919	0.414582	1.58727	0.51811	0.580922	0.468528	0.848931	0.403868	NA	0.456721	0.396329	0.830586	0.938044	0.986672	1.85838	0.908958	0.545555	1.50173	0.482388	0.938763	0.24274	0.157645	0.367676	0.268737	0.584135	0.71257	0.221447	0.722764	0.415981	1.00176	1.03406	0.45039	1.11464	1.04949	1.38515	1.55596	2.41656	0.476334	0.399546
Cp1471	Positive	246.122	1.41	0.554602	NA	NA	0.299962	NA	NA	1.57526	NA	0.672568	NA	NA	NA	NA	NA	NA	NA	NA	0.34654	NA	NA	0.66248	1.90366	0.695262	NA	0.555982	NA	0.381529	NA	0.414368	NA	NA	NA	0.340063	0.764407	0.686393	NA	0.392976	NA	NA	NA	NA	NA	NA	NA	NA	NA
Cp1827	Positive	246.123	2.06	0.899586	0.650371	NA	NA	0.421957	0.48087	NA	0.582116	0.343348	0.68019	NA	NA	NA	0.500017	0.388657	0.109657	NA	0.441327	0.206759	0.513002	0.844364	0.921355	0.601378	0.513755	0.545561	NA	0.751354	NA	NA	0.218655	NA	0.225274	0.394048	0.579515	0.379126	NA	0.747306	NA	0.559647	0.37169	0.619013	NA	0.475336	0.625563	NA	1.7874
Cp1793	Positive	246.136	3.51	0.292284	NA	NA	NA	NA	NA	NA	NA	NA	NA	NA	NA	NA	0.213808	0.185277	NA	3.50569	1.20827	1.40031	1.59037	5.23424	3.11915	1.50106	3.93057	NA	NA	NA	NA	NA	NA	NA	NA	2.57852	4.98699	6.65378	6.75442	2.31572	1.55402	1.24611	1.24519	4.60367	4.89732	2.10171	2.72765	2.68751	4.23834
Cp176	Positive	246.219	10.49	0.789167	1.17454	1.12091	0.815606	3.20405	0.748647	1.28852	1.04861	1.56145	0.738313	0.899829	1.2658	1.61789	2.44207	1.15106	1.76019	0.155781	0.877161	1.61474	1.11336	6.25005	2.45932	4.63881	3.99717	5.51696	1.07595	1.69199	1.43878	2.6663	1.72512	4.18235	1.95075	10.0984	4.79363	1.59076	1.89753	0.638819	1.72636	1.66623	1.29144	1.72127	3.42833	4.42806	19.7263	0.755785	2.97663
Cp1055	Positive	247.065	6.42	0.261432	1.25364	1.30562	0.515754	0.477162	0.60139	0.869003	NA	0.177966	1.3282	0.26467	0.156293	0.557693	0.764733	0.963351	1.06309	0.760741	0.74509	0.458107	0.722229	1.19065	0.69814	1.00298	0.761378	1.6118	0.632322	1.60585	NA	NA	0.591479	NA	2.34457	0.421368	0.229915	0.507185	0.658258	1.99619	0.379587	2.09186	0.576628	2.741	0.787933	1.83344	1.98729	0.328051	NA
Cp1147	Positive	247.069	3.96	0.671811	0.762977	0.253685	0.487992	0.420994	0.511101	1.01431	0.73733	0.576758	1.28048	0.863142	0.472424	0.182681	1.34006	1.24051	0.393911	2.15153	0.486909	1.54033	1.32856	1.0913	1.57707	1.11324	1.03989	1.34071	1.892	1.84101	0.534647	0.48953	0.60611	0.522027	1.2235	0.672508	1.00745	0.795003	1.27516	0.947054	1.1281	0.486023	1.76086	1.12655	1.20698	1.33789	1.54976	0.617954	0.702703
Cp1784	Positive	247.214	4.09	0.497917	0.329031	0.312205	0.160268	0.198247	0.158678	0.476996	NA	0.260123	NA	NA	0.344213	0.364954	NA	0.430793	0.216533	NA	0.211898	0.217835	NA	0.562186	0.51197	0.458505	0.491338	0.345339	0.337954	0.557235	NA	0.413147	0.229628	0.368103	0.395046	NA	0.478178	0.356646	0.27483	NA	0.317352	0.26633	0.388945	0.456377	0.50275	0.462787	0.468936	0.255412	0.518571
Cp116	Positive	248.062	3.96	5.0732	5.79374	2.09744	3.59247	3.91455	4.01854	8.24753	5.87823	3.88142	9.4791	6.93384	3.14117	2.01166	11.8226	9.71322	3.77392	17.9922	3.53143	11.2319	12.4832	8.66916	12.5298	9.30164	8.75377	12.3731	20.6248	14.8884	3.65229	3.50858	5.24623	4.36081	10.2017	4.91785	7.5831	6.55249	10.2019	7.22152	9.66989	3.46216	13.808	10.6682	7.98348	11.0538	11.785	4.42092	5.41396
Cp715	Positive	248.09	5.13	0.992586	1.02417	0.527401	NA	0.64128	NA	2.4608	0.955975	0.795209	1.4366	0.463204	NA	0.27606	0.938947	1.22408	0.54144	1.94388	0.626226	1.03266	1.23962	1.80298	5.89002	1.1363	1.78029	NA	1.21811	1.25179	NA	NA	0.610174	0.777836	1.72261	0.809243	NA	0.680204	0.636112	1.15029	1.03467	1.60322	1.85293	2.17652	1.6837	2.24087	2.0631	0.589212	0.33393
Cp1696	Positive	248.104	5.07	1.16161	NA	0.343397	0.505799	0.591103	0.558932	1.02154	0.312751	0.0698093	0.0654891	0.124661	0.354992	0.207283	0.342126	0.805911	NA	0.756892	NA	0.246946	0.573392	0.454438	0.57371	0.350701	0.674971	0.672311	0.763078	0.450344	NA	0.573477	0.409673	0.790107	0.538836	0.412831	0.867438	0.444924	0.213727	NA	0.178829	NA	0.600955	0.66679	NA	0.862131	NA	0.569876	NA
Cp24	Positive	249.111	9.52	39.3974	34.1557	61.4512	34.5836	28.6591	30.4194	44.8287	35.6674	24.1179	63.3185	25.7949	48.9948	11.8444	25.235	83.4092	24.9845	60.487	36.6756	41.7626	40.0388	38.6012	49.2916	42.8182	15.0233	16.1049	100.792	29.1135	7.42073	15.4151	36.7321	44.073	34.5294	31.0384	73.6553	26.019	83.4218	24.0627	17.7895	24.7333	16.243	25.1776	31.4376	58.4458	18.5739	50.2014	43.8914
Cp817	Positive	249.172	3.9	0.943871	1.18511	1.95994	1.23823	0.851616	1.63004	1.97218	1.22901	0.380271	NA	0.578257	NA	1.50521	2.35351	2.57335	0.861211	2.26283	1.45033	1.51775	1.60013	2.00912	2.46692	1.44292	2.67968	2.30417	3.71977	2.43008	0.703343	NA	NA	1.28617	1.54305	0.955566	0.968211	1.20709	0.716426	1.85663	1.75354	1.48728	1.67062	2.45337	1.11824	1.50507	2.46015	0.808174	1.26514
Cp1812	Positive	249.204	9.39	3.51642	3.98558	5.0332	2.99033	2.20842	2.2575	NA	2.71039	2.46291	NA	2.83451	NA	4.10869	3.98155	NA	NA	2.92351	3.67017	3.98039	3.32323	NA	4.93068	3.87818	3.13661	2.72976	4.6018	3.46044	NA	NA	4.11773	3.56501	NA	4.21158	2.8462	NA	2.43265	NA	4.54964	3.16007	3.991	3.71697	4.21558	NA	2.6272	3.11067	4.46978
Cp306	Positive	250.03	3.55	5.59134	5.04408	1.71999	1.18038	2.63541	1.40203	6.16698	3.30497	4.322	8.52943	2.37517	0.699347	1.38343	3.7246	1.99166	0.757759	2.66644	1.11232	3.09883	5.17419	5.19399	7.94075	2.73206	3.40952	3.85267	2.4161	4.02844	0.803148	0.513933	1.72824	0.799857	2.8113	2.02462	2.30352	5.44997	2.39102	4.51445	4.35953	0.984622	9.82305	4.47031	6.17818	7.36806	7.34242	1.89515	1.67995
Cp970	Positive	250.047	4.24	0.9049	1.18525	1.63214	0.631779	0.843699	1.30556	1.85929	0.849158	NA	1.07392	NA	1.52676	1.98516	2.45371	2.13723	NA	1.69712	1.9086	1.36339	1.81045	2.92952	1.96192	1.78353	1.5818	1.97082	2.17269	NA	0.330327	NA	0.78629	1.81225	1.49326	0.684198	1.61674	1.69622	0.662528	1.24947	2.21142	1.43069	1.63456	1.79044	1.6473	1.38878	1.41534	1.22585	1.09119
Cp1742	Positive	250.121	9.99	0.464112	0.204339	0.207898	NA	0.040869	0.0118236	0.366304	0.0230989	0.167519	0.0807005	0.116799	0.34478	0.242351	0.3174	0.352453	0.0447188	0.0771208	0.0585553	NA	0.0392834	0.5836	0.404478	0.453728	0.765679	0.290888	0.261109	0.551617	NA	0.537848	NA	0.484997	0.0765878	0.151708	0.346354	0.189816	0.366752	0.348976	0.261294	0.130217	0.24157	0.414552	0.386332	0.49165	0.182349	0.114707	0.483601
Cp1519	Positive	250.133	4.01	NA	NA	NA	NA	NA	0.208256	0.473638	NA	NA	NA	NA	0.406617	NA	0.0798347	0.269398	NA	NA	NA	0.216557	NA	NA	0.220049	0.159658	0.278642	NA	NA	NA	0.0328266	NA	0.126668	0.278268	NA	NA	NA	NA	NA	NA	NA	NA	NA	0.232612	0.152134	0.21738	NA	NA	NA
Cp464	Positive	251.079	4.95	2.86704	3.24169	2.44942	2.43056	2.89603	4.89079	6.61956	3.67321	1.41767	3.29815	1.38312	2.62904	2.86309	5.51554	6.35587	2.08242	5.9694	3.20243	2.99204	4.55907	5.75008	6.77164	3.58302	5.5804	3.8356	7.66149	3.91297	1.18823	1.42723	2.96742	3.64915	4.18784	3.25694	3.86678	4.66671	1.94809	4.51329	2.8242	3.54718	4.26015	5.04492	3.01391	3.4488	5.61193	2.17303	2.22255
Cp69	Positive	251.079	4.4	6.49521	12.9841	9.84634	8.22463	5.6793	8.49174	13.8298	8.59436	2.64979	15.9028	6.92386	16.725	21.0446	37.7985	49.2616	12.2986	22.2319	19.2065	11.331	21.6188	27.7652	23.6692	14.8008	25.5849	32.1742	29.6277	14.6064	5.27772	3.44123	10.5304	14.9819	14.8507	13.8453	7.55176	13.3841	10.6088	20.4187	19.6154	19.5011	24.4454	27.4212	16.8046	21.6124	33.8019	8.66076	15.6178
Cp1418	Positive	251.205	11.8	3.22147	NA	NA	1.66041	0.801225	1.71778	3.24055	NA	1.05379	1.19562	1.19283	3.68253	2.07269	2.82072	1.51036	1.9289	1.43528	NA	1.30928	1.43628	2.97655	4.35443	3.5167	NA	NA	2.37104	3.7162	1.22666	3.1695	1.23498	3.35105	NA	1.29471	2.17975	NA	2.44265	1.27729	2.99021	3.1074	NA	3.36275	1.9363	NA	3.82283	NA	2.3267
Cp1246	Positive	251.206	11.8	2.66953	1.89756	1.74317	1.60555	1.28395	1.60209	2.75723	1.46183	1.01687	2.71291	1.18272	3.20202	2.0292	2.35706	1.89917	1.62528	1.43651	1.455	1.25291	1.58598	2.62471	3.46331	2.97141	1.4718	2.19097	1.96228	3.32655	1.0609	3.40889	1.11116	2.94417	2.76437	1.26003	1.96634	2.46508	1.93782	2.47275	2.79146	2.79771	2.76023	4.06412	2.25433	4.20134	3.41982	1.65214	2.45259
Cp1841	Positive	251.209	6.4	0.604202	0.607663	0.549721	0.239793	0.741741	1.10416	NA	0.429956	NA	NA	NA	0.121971	NA	NA	1.01233	NA	0.503363	NA	0.398039	NA	0.258324	NA	NA	NA	NA	0.504248	NA	NA	NA	1.12186	NA	NA	0.80898	0.897501	NA	1.00406	NA	NA	0.14227	NA	NA	0.247285	0.366576	NA	1.30972	1.04121
Cp680	Positive	252.208	9.55	5.70973	5.95949	6.15067	4.01465	3.88363	3.11014	4.88246	5.45182	1.6613	1.92048	3.57748	3.49276	3.50424	9.7101	0.699125	6.43919	4.59538	8.81041	5.36338	4.44134	8.44201	4.88951	5.84921	3.85173	6.72168	6.4065	1.6586	4.32899	4.31682	6.52876	6.91946	3.20893	4.77468	12.1197	1.94438	2.44572	1.25971	8.09656	5.37114	3.21806	2.79843	2.50475	3.90643	9.45384	3.06011	5.28146
Cp796	Positive	252.208	9.55	6.32161	6.25488	6.12678	4.15789	NA	3.53175	4.81891	5.44216	1.648	2.01511	3.7105	3.63487	3.63907	8.88444	0.663226	6.71691	4.82752	8.91432	5.3922	4.48063	8.23058	4.7407	NA	3.89278	NA	NA	1.71477	4.54803	4.2369	6.5736	6.84025	3.49515	4.46391	NA	1.76505	NA	1.27973	8.2357	5.48433	3.48622	1.57729	2.52288	3.95216	9.80257	2.85043	5.35852
Cp498	Positive	252.208	9.54	5.45907	6.25501	5.96681	4.05447	3.81323	3.46699	5.18883	5.26923	1.68445	2.1685	3.92451	3.53432	3.7595	8.80768	0.815798	6.18927	4.89355	8.79276	5.09811	4.43061	8.12161	5.09247	6.1909	4.08501	6.92477	6.64025	1.83071	4.634	4.01922	6.44666	6.31461	3.46713	4.45313	11.426	2.06082	2.63383	1.47063	7.94522	5.11634	3.45878	2.96669	2.70487	4.18154	9.47253	3.0072	5.52841
Cp15	Positive	253.24	11.12	50.3122	94.4742	12.3305	19.0847	59.7987	122.396	55.0938	41.9908	20.7362	145.314	56.6524	128.896	5.17759	54.9349	62.8566	58.1851	194.183	21.7308	36.0783	2.98725	69.7108	22.6147	6.55279	18.804	56.9318	23.9125	6.1068	62.1855	7.97109	5.00874	12.2562	89.467	5.14521	157.806	106.598	77.4352	73.8683	91.3763	31.4605	16.0003	68.3203	9.87642	14.7513	69.5485	42.2221	26.2111
Cp212	Positive	254.08	6.56	1.9896	1.67976	3.03363	0.805541	1.17268	1.96312	2.8665	1.20725	1.3855	3.36524	1.65603	8.45584	5.84851	2.09897	9.61373	1.03377	3.57665	11.8407	1.99843	3.23283	8.35608	2.64391	4.82958	12.3113	3.41497	3.24261	4.83753	0.805209	0.593854	2.12829	8.83294	2.05821	7.12911	1.34787	11.0608	2.11019	1.88142	7.53259	7.8289	2.27695	5.04267	2.75899	7.47807	4.34537	4.94651	5.80779
Cp1438	Positive	254.153	8.73	0.880986	0.677424	0.889255	0.588643	0.488823	0.554767	1.12901	0.620369	0.32459	0.598689	0.387584	0.512561	1.07638	1.20188	0.861433	0.72545	0.386528	0.140603	0.0548138	0.197271	0.648249	1.0127	0.563442	0.224425	0.964111	0.8131	1.32294	0.530084	1.08497	0.643501	1.31827	1.19371	0.169966	0.620304	0.252203	0.238675	0.345134	0.448308	0.386067	0.336048	1.17786	0.0718409	0.527903	0.145662	0.318906	0.132122
Cp1685	Positive	254.188	9.2	0.887777	0.95688	0.69681	0.533119	0.459188	0.670853	1.35427	0.472121	0.694175	0.509822	0.546436	1.10511	0.880647	1.43832	0.767121	0.729515	0.535228	0.478611	0.702781	0.490921	1.30287	1.35037	1.11897	1.09163	0.846349	0.983284	1.36586	0.497846	0.851186	0.595272	1.06695	1.10787	0.463532	0.84415	0.824429	0.461875	0.612512	0.0559033	0.430609	1.03502	1.13668	1.27773	1.15439	0.908495	0.760619	0.978392
Cp1616	Positive	254.223	10.42	0.293908	NA	NA	NA	NA	NA	NA	NA	0.180103	NA	NA	NA	NA	NA	NA	NA	NA	NA	0.296648	NA	0.178631	0.389597	1.0345	0.59547	NA	NA	0.0652266	NA	0.0783345	NA	0.0357147	NA	NA	NA	NA	NA	NA	NA	NA	NA	NA	NA	0.288074	NA	NA	0.45003
Cp936	Positive	254.224	10.66	1.81644	0.858281	1.65532	0.181725	0.827865	0.453864	1.95513	0.216811	1.14414	1.24942	1.42455	1.33884	1.39022	2.64117	1.6748	0.539407	1.2073	0.262272	0.992045	0.53789	3.01992	1.90651	0.683527	1.68228	1.43008	0.351901	2.98216	0.430868	1.8084	0.613155	1.39353	1.90585	0.557972	0.916272	1.14988	1.73957	1.14017	2.25034	1.35654	1.42594	0.959084	2.57237	1.78715	1.1917	0.532642	2.04313
Cp1778	Positive	255.018	3.9	0.242537	0.492035	0.153384	NA	NA	0.0810183	0.782852	0.458922	NA	0.674425	0.497146	NA	0.278779	0.328066	0.553398	NA	0.348198	0.231884	NA	0.344645	0.381658	0.558671	NA	0.27786	NA	0.24676	NA	NA	NA	0.217436	NA	0.183648	0.429906	NA	0.314465	0.54966	NA	NA	NA	NA	NA	0.136457	0.252936	NA	0.21047	0.558754
Cp46	Positive	255.256	11.83	22.9138	32.8656	20.1258	13.8668	27.9486	41.2416	21.4418	25.4637	15.9876	49.4093	18.0816	24.9443	9.16558	20.5161	34.1724	15.5664	69.9052	23.7366	43.7748	8.95369	17.5968	16.225	11.47	9.61967	22.2484	15.6306	7.30428	50.3323	12.3708	16.2376	11.4261	24.6596	12.9651	49.5957	32.7808	46.1289	29.9028	30.6265	21.6325	13.6913	41.4356	17.6793	15.9948	29.842	30.172	26.0724
Cp1697	Positive	256.057	4.72	0.459979	0.465669	0.510231	NA	0.601909	0.636323	0.689597	0.890956	NA	0.610377	0.300359	0.315139	0.126001	1.34345	0.490879	NA	1.1034	NA	0.891648	0.897785	0.720216	1.90033	0.530419	0.65881	0.739399	1.35664	0.563788	NA	0.31285	0.553004	0.743327	0.817164	0.595275	0.208321	0.515268	NA	1.01224	0.497879	0.378862	1.09385	1.14054	0.921527	0.652838	1.53893	NA	NA
Cp1611	Positive	256.057	5.2	0.586783	0.836309	0.421234	0.296534	0.475664	0.327567	1.45463	0.748329	0.317347	0.590522	0.16035	0.260677	NA	1.67701	0.788874	NA	0.621277	NA	0.511643	0.709785	0.754235	1.12526	0.322864	0.789399	0.830196	1.02204	0.529771	NA	0.275147	0.500576	0.900647	0.415588	0.455125	NA	0.490515	0.33073	0.926916	0.502203	0.469124	0.76219	0.801274	0.994322	1.14979	1.32328	0.324654	NA
Cp946	Positive	256.058	6.05	1.4226	0.64941	0.612964	0.278505	0.568957	0.625709	3.08078	0.833636	0.45376	1.10227	0.306349	0.260819	0.232973	1.41472	1.12216	0.291314	0.781368	0.343735	1.83428	1.4264	1.08629	3.76078	0.951806	0.758511	1.69478	0.76281	1.65423	NA	0.260993	0.643907	0.506361	0.995098	0.652412	0.272398	1.2374	0.421718	1.34422	1.23219	0.291352	1.79622	0.609039	1.43218	1.72789	2.28863	0.311459	0.262464
Cp1699	Positive	256.13	3.89	NA	0.244576	0.233224	0.232493	0.375096	0.294246	0.849242	0.494364	0.370417	0.655051	0.210638	0.578369	0.407498	0.58163	0.67433	0.324693	0.600034	0.356942	NA	0.38954	0.843686	1.0328	0.70577	0.485734	0.894157	0.824902	0.652266	0.21904	0.429498	0.411841	0.444681	0.714185	0.389319	0.495961	0.310676	0.330063	0.572236	0.61818	0.472399	0.454146	0.45139	0.631982	0.681143	0.57182	0.128555	0.144584
Cp1273	Positive	256.133	6.95	0.343951	0.345647	NA	NA	0.408369	0.631755	1.03369	0.810782	NA	NA	0.208267	0.178134	NA	0.5123	NA	0.0591615	1.02166	0.196353	0.339533	0.855451	NA	2.25874	0.373217	0.821851	0.575913	0.649085	0.465324	NA	NA	0.158234	0.37369	1.0842	0.361605	0.178117	0.451365	0.256553	0.64103	NA	0.257815	1.24434	1.29787	0.531378	0.802731	1.50522	0.187738	NA
Cp1260	Positive	256.177	3.06	NA	1.12895	1.12691	0.805762	1.07811	1.61405	2.11154	0.976507	0.650366	1.35029	0.764936	1.00881	0.970628	1.49763	1.92731	0.387919	1.8315	0.7971	0.999287	1.10189	2.04314	2.11152	1.28122	1.35281	1.72266	1.99527	1.47306	0.372133	0.655106	0.745784	0.936143	1.46605	0.777325	0.946758	0.906897	0.765656	1.2007	1.13505	0.95947	1.207	1.60947	1.51793	1.37539	1.25045	0.754479	0.861275
Cp239	Positive	256.239	12.65	12.0167	6.80939	6.8987	5.61379	4.09247	4.08907	9.60799	5.27302	7.56422	10.8408	7.70377	9.0613	7.34407	10.1894	12.2041	7.5961	5.35535	5.49391	4.96704	4.29141	11.6856	11.014	9.05506	8.44098	8.33244	5.61218	11.882	3.51304	6.41623	5.50512	8.30587	8.16837	3.96333	9.03866	8.82043	8.24171	9.26974	9.63329	8.19899	9.75205	9.17966	11.3547	11.0888	9.08847	5.64507	8.84749
Cp808	Positive	257.05	1.62	1.16914	2.42021	1.14766	1.83229	0.859426	2.31272	1.9559	1.32287	0.527131	0.650728	0.559664	0.515256	0.24439	1.48179	1.17662	1.07475	2.65659	0.52992	0.917067	1.11653	1.10702	2.24022	0.956446	2.21584	1.14636	3.78441	1.50567	0.530672	NA	0.986927	1.10168	1.24608	0.82159	0.916272	0.98002	0.591685	0.780132	0.418812	NA	1.00871	1.23658	1.02309	1.26161	0.838777	0.669167	0.322104
Cp1501	Positive	257.102	1.3	NA	0.948366	0.860782	NA	0.626302	0.545228	1.10033	0.686366	NA	NA	0.671721	0.597232	0.820297	1.09167	1.88107	0.646069	0.523836	NA	NA	0.455541	0.771854	1.07713	0.333235	NA	0.562235	1.17707	0.890389	NA	NA	0.376617	0.416197	0.461023	NA	0.999967	0.649642	1.13641	NA	0.698637	NA	NA	0.880259	0.828284	0.87454	0.553138	NA	1.02735
Cp218	Positive	257.162	2.61	17.4163	13.2075	13.4348	8.20461	8.74779	8.38345	14.2577	9.03055	9.92123	12.389	10.5123	12.1038	10.3833	14.2114	17.6928	7.47339	9.96782	8.89515	10.1289	9.1556	14.0318	17.1491	13.142	15.1993	11.3227	15.4244	17.6068	3.97011	11.4049	8.96837	13.952	12.5473	7.20227	17.2013	12.2082	12.8623	10.9323	11.6163	9.71457	11.8846	14.9522	13.9438	14.8061	12.0802	10.489	15.0622
Cp610	Positive	258.146	11.25	2.43157	2.70942	0.396624	0.699249	2.18499	2.03863	4.0969	2.30365	1.74072	5.71276	3.24518	1.5842	0.911773	1.72582	1.30105	1.77752	3.92731	0.889433	2.34421	3.3985	3.77822	6.38933	3.76574	2.24751	2.09978	2.019	2.32491	0.356677	2.31233	1.31992	1.11515	2.58807	1.18333	1.18034	2.01839	2.35433	3.27185	3.77317	2.80269	2.66066	4.75697	3.14492	4.64153	3.85396	0.635722	0.838894
Cp1486	Positive	258.147	10.77	0.936638	0.706262	NA	0.200417	0.563928	0.346646	0.773294	0.446333	0.627809	1.40473	0.673967	0.443917	NA	0.338409	0.319596	NA	1.68203	0.390018	1.18049	1.14215	0.911181	1.56219	1.23373	0.41653	0.466358	0.627494	0.58423	NA	0.722581	NA	0.158306	0.622905	NA	0.30119	0.352226	0.590752	0.959625	0.786353	0.725104	0.971513	1.40613	0.981372	1.10419	1.13349	NA	0.528362
Cp1165	Positive	258.148	9.65	2.05898	0.81571	NA	0.0937936	0.250456	NA	0.677198	0.435089	NA	0.874896	0.198659	0.622902	0.574412	0.226575	NA	0.0841954	0.119607	0.184315	0.175092	0.314877	1.77682	3.22506	0.699902	0.391897	0.561584	NA	1.82775	NA	0.170213	NA	0.179121	1.88341	NA	NA	0.572099	NA	1.38496	0.536487	0.849558	2.20567	1.18156	0.307675	1.1074	1.01964	0.236599	0.332913
Cp1398	Positive	258.171	7.34	NA	0.294974	NA	NA	0.162834	NA	0.894836	0.283175	0.577945	1.09186	0.641648	1.29275	0.522489	0.912281	0.659575	0.736041	NA	0.314866	NA	NA	1.79607	1.34705	1.35668	0.743132	0.742265	0.662765	1.10136	0.260846	0.670724	0.29452	0.835024	1.0404	NA	NA	0.706094	0.464009	0.820058	0.761644	0.604319	0.711981	NA	1.03031	1.30372	0.615681	NA	0.636959
Cp1303	Positive	258.182	8.62	0.856481	1.40648	1.40521	1.40281	0.457048	0.499815	0.934618	1.2895	0.282324	0.42672	1.33558	0.414559	1.29752	1.75879	NA	0.990553	0.967935	1.03611	1.24751	1.28745	0.671561	1.83939	0.713002	1.09176	1.45822	1.39084	NA	1.18294	0.608496	1.46285	1.08064	0.847772	1.04817	0.86024	0.437599	0.378492	0.260859	2.55457	1.08654	0.784395	0.612417	0.665517	1.21644	1.09436	0.636114	1.33305
Cp349	Positive	259.055	7.06	3.20538	2.7649	0.757191	1.61285	1.54307	3.52289	4.14817	3.91128	1.75521	3.28022	2.72058	2.90815	1.75626	3.93307	3.84656	2.29189	4.85245	1.54207	5.13532	5.03962	4.18129	7.10805	3.09941	5.84536	5.2533	5.76157	3.51646	0.93048	2.47474	3.49916	2.97999	6.04731	2.09056	1.47038	2.04213	1.51597	3.48068	3.46801	3.04282	4.03838	3.97918	5.52044	6.07856	2.34779	1.94322	1.82034
Cp599	Positive	259.055	6.63	1.21682	1.10533	0.379025	0.829874	1.00953	1.17819	2.38149	1.465	0.499944	1.435	0.911809	0.968392	0.730588	1.61948	1.65807	0.761182	2.73879	0.571294	2.13973	2.23391	2.03542	4.25866	1.58293	1.9359	2.21194	2.05347	1.42905	0.530967	0.856555	0.838041	1.09335	1.90313	0.655564	0.754951	1.00667	0.865582	1.92193	1.4175	0.935234	1.92676	3.00852	1.81115	1.96576	1.09017	0.677136	0.673455
Cp410	Positive	259.055	6.52	2.01263	1.09215	0.697382	1.11988	1.43737	2.42074	3.42383	2.24817	0.663782	2.4532	0.89047	1.18553	0.962609	2.87389	2.81673	1.05699	3.69549	0.916198	2.41422	2.32443	2.8909	7.00515	2.48616	2.06245	3.47593	3.61007	2.7818	0.808594	1.13658	1.49834	1.75714	3.65703	1.32453	2.10395	1.7389	1.20218	2.69822	2.06935	1.12558	3.79667	2.26001	1.12928	2.84728	2.34522	1.31495	0.895354
Cp956	Positive	259.056	7.24	1.02403	0.926394	0.407498	0.712079	0.823907	1.45175	1.85025	1.33387	0.474418	1.06128	0.658494	1.00158	0.47179	1.59734	0.953768	0.724594	1.89092	0.420055	1.6616	1.40078	1.43122	3.90769	0.469831	1.43948	1.89956	2.27341	1.30344	0.48342	0.604591	0.878955	0.759103	1.09277	0.692867	0.893125	0.591422	0.524579	1.23306	1.19683	0.763488	1.12836	1.76438	1.80338	0.823368	1.36335	0.418719	0.536501
Cp1411	Positive	259.142	6.81	0.203566	0.608761	0.844614	0.473613	0.18359	0.788283	0.513678	0.177213	NA	0.784268	0.403307	NA	0.391595	0.621224	0.816863	0.585303	0.449179	0.59315	0.249502	1.00905	0.817799	0.817663	0.767722	0.667412	0.775353	0.55132	0.296796	NA	0.0675971	0.288153	0.274434	0.813627	0.492428	0.20084	0.182617	0.332865	0.378193	0.211259	1.01908	0.665166	1.3413	0.318445	1.24934	1.65089	0.245353	0.344357
Cp966	Positive	260.016	6.91	2.91399	1.77767	2.05037	1.28922	1.01916	0.938899	2.401	1.19307	1.43631	2.93356	1.54609	3.05849	2.30839	2.30179	1.7825	1.66519	1.04952	1.24591	1.30687	1.12104	2.76173	3.69682	2.79237	2.20372	2.34378	1.55029	3.56796	0.947556	3.07359	0.965116	2.07277	2.29913	0.921021	2.26217	2.20984	1.83122	2.35227	1.96264	2.29086	2.71851	2.99565	2.04317	2.61107	2.37432	1.43789	2.61104
Cp424	Positive	260.08	7.46	1.61007	1.69294	1.13951	1.4496	1.93967	0.949513	2.18762	2.69364	1.3538	6.61744	2.50919	2.20966	3.32808	8.35566	0.562069	0.732297	6.77478	1.27863	2.55722	2.76509	5.58215	5.30571	2.15756	3.96368	3.92809	6.02724	4.43712	2.0616	1.53253	3.22834	1.82474	2.93809	1.57659	5.09652	0.644211	1.98505	3.44436	2.61865	3.16387	3.82651	7.73042	3.13142	0.856135	2.51728	0.747554	1.72942
Cp1860	Positive	260.138	3.12	NA	NA	NA	NA	NA	0.362903	NA	NA	NA	NA	NA	NA	0.495712	NA	0.465171	NA	NA	NA	NA	NA	NA	NA	NA	NA	NA	NA	NA	NA	NA	NA	NA	NA	NA	0.325325	NA	NA	0.333494	NA	NA	NA	NA	NA	NA	NA	NA	NA
Cp549	Positive	260.233	10.98	0.048714	0.16273	0.492632	0.00995451	0.140688	NA	2.0086	NA	1.0215	1.53379	0.45971	1.69256	0.678257	1.28624	0.146336	0.406214	0.257993	0.26344	0.296648	0.268274	2.08773	2.42877	1.32666	1.03272	0.226535	0.344257	2.33879	0.705699	1.69017	0.0969993	4.25192	0.633244	0.461561	0.19463	0.907023	0.437994	0.863826	3.08117	0.637856	1.93214	2.30923	1.00959	1.1113	0.600384	0.240649	0.542732
Cp1768	Positive	260.972	3.85	0.275161	0.316122	NA	0.248863	0.208946	0.245205	0.833871	0.207401	0.251812	0.408146	0.273904	0.651268	0.328255	0.448787	0.52906	0.255047	0.276003	0.269518	NA	0.286818	0.419471	0.650331	0.459596	0.518316	0.448121	NA	0.539758	0.156331	0.348601	NA	0.450707	0.576517	0.240763	0.43386	0.445429	0.404774	0.325928	0.786353	0.437683	0.446367	0.723897	0.388786	0.659391	0.347911	0.279843	0.520224
Cp1423	Positive	261.051	5.13	0.306603	0.608487	0.526542	0.257158	0.332088	0.592925	1.65651	0.560117	0.615105	0.227691	0.630667	0.113745	0.222235	1.01345	1.34166	0.587442	0.550159	0.102501	0.509939	0.39503	0.570318	0.33973	0.246173	1.45512	0.610564	0.850651	0.154328	0.258786	0.100908	0.67195	0.633115	0.3843	0.560993	0.366255	0.71986	0.44293	0.253293	0.907734	0.227684	0.368154	0.589253	1.63039	0.910933	0.620419	0.33785	0.156538
Cp61	Positive	261.07	6.09	9.59918	20.3837	18.068	10.6869	8.62433	16.0173	17.0448	6.03051	5.0417	21.7193	11.2202	9.42835	8.35874	16.7074	15.8929	14.1652	15.6929	12.4593	10.4067	20.1747	18.5862	21.989	19.3422	17.347	19.6588	13.9812	20.1853	4.61324	3.53372	8.31485	7.20277	22.1897	16.6399	8.28625	14.4667	17.0127	16.7264	13.5218	19.2459	22.8333	30.3382	14.0394	26.7661	29.9527	7.11235	11.0735
Cp1242	Positive	261.075	9.06	0.623983	0.562071	0.405065	NA	NA	0.0964696	1.19863	0.14947	0.642293	1.02829	0.84979	1.00286	0.817171	0.919554	1.03895	0.487948	0.191032	0.0628798	0.309854	0.0771029	1.43013	1.39327	1.02945	1.64305	0.839705	0.501968	1.45933	NA	0.736979	0.182619	1.00845	0.977821	0.147374	0.595041	0.774291	0.237341	1.02621	0.806583	0.347421	0.931629	1.21776	1.62998	1.03308	0.873839	0.240257	0.928925
Cp1772	Positive	261.084	5.97	NA	0.453447	0.402776	0.289676	0.26062	0.260253	0.768515	0.450978	0.29942	0.378844	0.366995	NA	0.217885	0.739522	NA	NA	0.363284	0.216222	0.326611	NA	0.527897	0.720778	NA	0.56354	0.625806	0.501566	0.220179	0.237441	NA	0.272573	0.529915	NA	NA	0.416641	0.462605	NA	NA	0.568145	0.372181	NA	0.706685	0.55278	NA	0.708818	NA	NA
Cp995	Positive	262.049	5.91	0.700744	0.610821	0.682645	NA	NA	0.5459	1.89236	0.42079	0.590648	1.5538	0.993793	2.16555	2.38002	1.78642	0.754344	1.02746	NA	0.482	0.517039	NA	3.10585	3.67149	3.19916	1.64214	1.32417	0.631383	2.30774	0.909282	1.56157	0.440832	1.59917	1.84613	0.474828	1.64808	2.85405	0.546325	1.48984	1.61919	1.28829	3.3049	1.88342	1.36757	2.40052	1.7382	0.597443	1.66901
Cp596	Positive	262.07	6.09	2.48471	4.73139	4.4892	2.70187	2.03607	3.70991	4.33171	1.59932	1.24933	4.49008	2.64209	2.4553	2.1238	3.93032	3.82207	3.32374	3.88513	2.97697	2.81042	4.78953	4.73874	5.09896	4.59583	4.13949	4.46649	3.61356	4.77028	1.38991	0.979547	2.16406	1.75057	5.12458	3.95007	2.04086	3.72319	3.94662	4.09994	3.13012	4.28591	5.24736	7.05237	3.35635	6.19066	6.32318	1.89867	2.7279
Cp1235	Positive	262.229	11.45	4.47195	2.15724	3.76921	1.81703	0.511933	9.14956	7.22973	2.61555	2.56359	12.3432	3.12264	8.001	2.16689	5.81888	7.83717	4.01624	17.1996	1.69425	4.00326	0.585469	6.91877	3.71487	2.44154	2.80258	6.87513	1.51006	0.857932	7.41469	1.7513	1.11481	0.887172	5.33	1.4744	21.8003	11.9585	3.95382	12.4208	5.96668	4.71875	1.62056	6.89746	0.912666	2.51402	7.02402	3.87665	4.70605
Cp59	Positive	262.229	11.36	10.9956	20.8518	5.65174	2.09199	8.36371	19.5047	13.4978	15.4528	7.99839	43.7339	14.1099	31.7792	2.36153	14.9082	27.3899	15.2333	47.9003	2.25011	7.449	0.861551	20.4045	4.35	0.909504	4.04982	24.2389	5.33846	3.20718	27.1531	3.22782	2.1203	3.30263	24.8402	0.906704	50.6253	29.1811	29.1822	34.6559	15.1577	7.88956	4.11207	23.2386	3.13878	6.11662	28.7392	9.83919	7.25694
Cp1190	Positive	263.025	8.01	1.51102	1.21052	1.03692	0.776894	0.631972	0.655536	1.55008	0.793549	1.1477	1.92576	1.52338	1.81949	1.65256	1.88921	1.25237	1.1199	0.475039	0.824683	0.699373	0.613163	1.91114	2.37906	2.06818	1.81378	1.37328	1.01239	2.53479	0.812275	2.15176	0.77044	1.80743	1.66806	0.53735	1.60122	1.30787	1.16189	1.65327	1.56637	1.74339	1.87429	2.53219	1.79684	1.96674	1.67133	1.02727	1.48132
Cp1078	Positive	263.057	7.08	0.634611	1.78165	0.594506	0.266007	1.06634	1.61875	0.595567	0.798071	0.962134	1.85163	NA	NA	NA	NA	NA	NA	NA	NA	NA	0.376364	0.49808	NA	1.54008	0.241368	1.37576	0.41748	0.534764	NA	NA	0.18736	NA	2.56739	0.803595	0.370912	NA	0.560333	0.454902	NA	0.874186	0.221345	1.08263	0.760941	0.369365	1.63356	0.528592	NA
Cp230	Positive	264.09	5.46	NA	1.33631	1.04865	0.982952	0.807324	1.17215	1.46444	0.917477	NA	0.014731	NA	NA	12.3427	13.3028	17.555	5.04638	NA	NA	NA	NA	0.14014	NA	NA	NA	NA	NA	NA	NA	NA	NA	NA	NA	NA	NA	NA	NA	NA	NA	NA	0.0352172	NA	NA	NA	NA	NA	NA
Cp919	Positive	264.156	4.62	0.561245	0.412524	NA	NA	NA	NA	0.140916	0.520396	0.378727	1.39577	NA	NA	NA	0.750996	0.87847	0.782151	0.754121	NA	NA	0.809092	NA	3.76188	NA	1.03611	1.49143	1.05771	0.651953	NA	0.38728	0.445574	0.266765	1.34199	1.10662	NA	1.01904	0.684941	1.12468	0.283686	1.20523	0.327704	1.62507	1.58636	0.97842	1.44024	NA	0.280649
Cp626	Positive	264.243	12.01	1.85911	2.99808	1.09944	0.627244	1.49011	3.56239	2.2141	2.62606	1.33077	6.13019	2.01941	3.49532	0.719714	2.21646	3.67512	1.84107	6.11856	0.765427	1.96606	0.417722	2.32912	1.16927	0.723373	0.851566	3.13307	1.05235	0.694554	3.96613	1.06801	0.493667	0.729961	3.04896	0.60644	5.75775	3.70159	4.16154	3.8676	2.30331	1.85239	1.06076	4.48366	1.0449	1.50716	3.69476	1.63529	1.36916
Cp654	Positive	265.095	4.77	1.04292	2.06468	1.86035	1.14764	1.11759	1.02086	2.25491	1.67681	0.678622	2.22983	1.19283	2.04216	2.6346	3.3175	5.76642	1.6884	2.26821	2.93548	1.86353	2.49169	4.77099	3.76869	2.21501	2.91375	3.59643	3.19353	3.27522	0.551575	0.65657	1.51473	2.40976	1.97782	2.01122	1.11895	1.95221	1.5628	3.99692	2.82543	2.87474	2.53253	3.23759	2.5965	2.42074	4.55385	1.62092	2.24239
Cp219	Positive	265.973	5.73	9.2229	11.7492	8.02734	3.96411	3.19131	5.58919	13.2117	5.34598	10.9808	14.214	12.6892	11.9073	10.6905	10.9844	13.1711	8.09432	4.97575	4.74532	5.74835	3.14829	13.6078	10.5953	11.9406	15.3681	9.88327	6.85228	15.1894	4.929	10.8854	6.52456	9.20235	10.9959	5.77385	10.7738	9.05962	5.76063	8.83637	9.90832	7.70654	12.3707	12.6983	14.9635	12.1455	8.82625	5.88454	10.8717
Cp1278	Positive	266.078	3.65	1.6427	0.523757	0.284876	NA	NA	NA	0.996745	0.441323	0.468482	1.84682	NA	NA	NA	0.585024	NA	NA	NA	NA	0.173672	0.549724	0.811972	1.72999	0.593327	NA	0.534488	NA	1.376	NA	NA	NA	NA	0.652697	0.193609	0.27762	0.630067	0.141417	1.03715	0.359974	NA	2.36662	0.524102	0.699052	1.13696	1.1079	0.33589	0.47241
Cp1200	Positive	266.08	6.86	0.735582	1.25803	0.523251	0.148654	0.281162	0.38964	0.394849	0.318862	1.06744	2.61444	0.913306	NA	0.507673	0.489351	1.03956	0.141217	0.19565	0.201145	0.302328	0.627071	1.35396	1.47433	0.200323	0.28555	2.26288	0.65673	0.391047	0.163103	NA	0.296146	0.350355	0.959592	0.144878	0.398434	0.207496	0.220665	0.248753	0.46792	0.736371	1.25367	1.45487	0.737903	0.326837	1.23312	NA	0.308497
Cp192	Positive	266.08	7.06	7.03505	19.2792	3.02261	0.425832	2.18371	0.833159	10.1742	1.54408	3.76282	10.5361	1.62034	0.302374	1.0931	2.72553	1.11684	0.750591	1.55227	0.785179	3.67224	4.35753	4.27224	9.24569	1.8579	2.04485	5.43437	1.16393	4.47582	NA	0.190224	0.840751	0.841816	1.8211	1.59182	2.73781	3.69301	1.19711	3.90299	2.90836	1.28776	6.45733	3.13946	7.34768	5.55972	9.44234	1.2363	0.588383
Cp728	Positive	266.08	8.1	1.37137	2.93738	0.518673	NA	0.683754	0.634711	1.95203	0.203612	0.493651	1.73506	0.477555	NA	NA	0.823235	NA	0.657944	0.43317	0.219144	0.682049	1.02783	1.30599	1.87722	0.760763	0.499809	1.99166	0.258695	1.01913	NA	NA	0.278263	NA	1.58059	0.384459	0.456725	0.840468	0.404507	1.17951	0.443366	1.67684	2.27794	2.24617	1.66761	3.83825	4.31965	NA	NA
Cp289	Positive	266.126	11.23	10.6817	9.83494	10.6932	8.92289	8.61063	10.9451	8.90341	9.16633	9.20058	10.9075	8.4239	10.1894	10.1142	11.1825	11.0009	8.15423	10.8416	9.90321	10.636	9.07947	9.00393	9.84948	9.49173	8.9649	9.19468	8.73395	9.83844	14.6289	9.09986	11.2752	7.96263	10.0954	11.438	10.8934	9.01277	10.2278	7.98419	10.8377	9.46933	10.2553	10.875	9.82476	10.4239	9.03324	10.7506	10.339
Cp427	Positive	266.163	10.19	2.54642	3.48091	1.59451	NA	4.82661	3.8174	5.349	NA	5.44976	7.18939	5.04159	9.93665	4.82881	4.76455	6.77996	2.42755	0.935301	NA	1.18773	2.78827	2.27328	6.08902	4.11958	5.6341	3.30893	NA	5.73338	2.36307	3.95723	2.66843	NA	4.91278	2.5931	NA	6.98226	1.27182	4.11775	10.7792	NA	6.72648	7.62232	8.21468	6.41613	3.17899	NA	4.72093
Cp1690	Positive	266.164	10.19	1.30288	2.47968	2.3507	1.3182	4.02571	2.7389	5.49379	NA	4.91871	7.00813	NA	NA	3.7228	NA	NA	NA	2.87348	1.98784	NA	2.08007	NA	5.31473	NA	4.82697	2.62125	NA	NA	1.6796	2.85823	1.94283	NA	4.16349	2.35247	2.54558	6.79106	2.92627	NA	NA	0.449604	6.02313	6.85804	NA	6.08121	NA	2.82038	4.45961
Cp1798	Positive	267.215	9.4	3.7281	4.10409	5.15768	3.13578	2.31563	2.43351	NA	2.87025	2.50197	NA	2.98612	2.3295	4.37252	4.19924	NA	NA	3.32836	3.85881	4.18062	3.44535	NA	5.13109	4.06964	3.2573	2.73054	4.76447	3.50242	3.50523	2.5959	4.12396	3.73022	NA	4.23168	2.63407	NA	2.6329	NA	4.80676	3.28295	4.18519	3.91757	4.34045	2.7809	2.98879	3.20082	4.75068
Cp111	Positive	267.256	11.54	8.1875	14.8955	1.76735	2.1828	7.38467	18.5619	9.18537	9.40673	4.64659	26.675	8.3957	19.3118	0.69783	9.33711	13.9892	9.23111	31.6959	3.14317	6.53989	0.585225	12.3476	3.52315	1.87032	2.47455	12.3412	3.35352	0.72389	17.1166	1.80682	0.701077	1.88817	14.2902	0.729908	27.2304	18.9854	17.3051	18.0966	12.75	6.52463	3.06828	15.4682	2.20689	3.38285	18.258	6.34494	4.15429
Cp806	Positive	267.257	11.66	0.768206	2.49176	NA	NA	1.36751	2.91975	2.23967	1.97538	1.10009	4.01981	1.81962	NA	0.263827	2.21663	2.74037	1.75676	4.12727	NA	1.45825	0.421016	2.11226	1.45011	NA	1.13555	0.64261	0.510149	NA	3.01666	0.575551	0.45316	NA	2.64997	0.846283	5.01804	3.4427	2.78366	2.92532	NA	1.57833	0.601096	3.10037	NA	1.70404	3.09005	1.42025	NA
Cp134	Positive	268.059	5.73	10.2518	9.6457	1.83431	2.72853	5.98902	8.75562	15.9593	9.24883	3.99314	8.04907	3.97692	4.49831	3.10965	5.51538	5.27249	3.12925	12.3804	2.74193	9.11898	11.7967	12.1732	22.8672	9.77024	13.0399	10.6881	9.28299	8.49709	1.97372	4.73875	3.81508	6.34649	13.2316	3.27861	3.1042	5.70861	3.467	7.90492	6.74871	5.27093	13.8463	11.9158	12.5309	13.5649	8.40903	4.32476	3.08942
Cp182	Positive	268.131	11.59	6.60223	7.08157	1.75919	2.99144	7.40328	5.7867	11.3726	4.80016	9.1005	22.3207	14.9703	5.99161	2.90223	5.8769	5.46218	6.17301	10.9224	2.08321	6.16812	7.85949	13.3073	15.6649	10.9304	5.0441	7.46968	8.2061	5.38946	1.26434	7.76683	4.76164	2.4997	8.09287	4.56754	4.80323	4.31145	7.06527	7.64546	9.22266	7.86244	5.6554	13.297	10.0898	11.6161	9.2206	2.64701	2.01566
Cp1607	Positive	268.132	10.65	1.04779	0.369816	NA	0.107177	NA	NA	0.217768	NA	0.106495	0.457943	NA	0.479374	0.275652	NA	NA	NA	0.317411	0.229897	NA	NA	0.899119	1.18098	0.361891	0.231203	0.372826	0.142557	1.3476	NA	0.283566	0.0293978	NA	0.959456	0.0790723	NA	0.239701	NA	1.04041	0.250793	0.834623	1.22751	0.386079	NA	0.498482	0.424533	NA	0.342196
Cp1656	Positive	268.134	11.01	0.198251	0.0873386	NA	NA	0.109983	NA	0.0687143	NA	0.184852	0.879539	0.485666	0.110625	0.163244	NA	0.0603901	0.106234	NA	NA	NA	NA	0.478292	0.723786	0.222156	NA	0.0797238	0.0105946	0.0190374	NA	0.0909022	NA	NA	0.133995	NA	NA	NA	0.155693	0.176467	NA	0.307858	0.0495021	0.125476	0.21266	0.204692	0.0728312	NA	NA
Cp529	Positive	268.241	10.71	4.77914	3.07718	3.22707	1.9356	2.2065	2.01337	5.89535	2.20955	2.78287	5.29677	2.91038	5.11597	3.57234	4.66855	4.47221	2.87816	2.38059	2.76519	3.36963	2.56001	6.24463	6.60067	4.12995	5.01608	4.14994	3.98718	6.24334	1.14555	3.86609	1.92495	4.8583	5.34428	1.62177	4.08145	4.87055	3.77892	4.19656	4.06195	3.63757	3.15455	4.65289	5.46291	5.93327	4.24194	2.41263	5.03451
Cp228	Positive	269.272	12.17	6.48044	7.53365	3.64902	2.40921	5.79891	10.1828	5.58924	6.27604	4.06105	13.2972	4.58288	7.31456	2.58254	6.40552	7.77845	3.09073	14.9851	4.59314	9.05777	1.72835	5.26419	4.70018	2.9519	3.83413	6.66671	2.44627	3.37071	11.8299	3.50919	2.70392	3.62275	7.05193	2.21599	12.2294	9.08817	10.7109	8.24796	7.56069	4.77639	4.76776	11.3946	4.94557	4.05563	8.33498	4.71814	4.99127
Cp1179	Positive	270.072	6.09	NA	0.77053	0.610102	0.315115	0.22157	0.606495	0.976337	0.139815	NA	0.777382	0.453346	NA	0.295905	0.721583	0.599794	0.56519	0.686852	0.375876	0.399317	1.04443	0.928122	0.974863	0.809206	0.596122	0.882693	0.527449	0.794266	NA	NA	0.332453	0.281774	0.92708	0.532621	NA	0.599252	0.62117	0.758714	0.496026	0.796108	0.955531	1.70052	0.521426	1.60156	2.57021	NA	0.385812
Cp1749	Positive	270.149	11.06	0.939738	NA	0.670626	0.443197	0.244465	0.214168	0.640386	0.450611	NA	0.725343	0.446982	0.75239	0.40043	0.511815	0.659575	NA	0.405154	NA	NA	NA	0.654077	0.531441	0.578316	NA	NA	0.333796	0.523841	NA	NA	0.362122	0.582172	0.607261	0.273075	0.906957	0.462099	0.735104	0.406362	0.475642	NA	0.47027	0.628986	0.566685	NA	0.593886	0.3095	0.740088
Cp1673	Positive	270.169	3.68	1.00602	0.705438	0.538561	0.309364	0.350275	0.441369	0.450518	0.457577	0.413513	0.345219	0.192669	0.327336	0.233244	0.395133	0.832835	0.352401	0.386682	0.264142	0.529962	0.412842	0.56571	0.754656	0.423025	0.411707	0.294144	0.678858	0.592813	0.127332	0.192542	0.464811	0.431206	0.364438	0.505826	0.657706	0.285165	0.731235	0.430691	0.585132	0.335631	0.478614	0.387526	0.361522	0.493184	0.427782	0.354834	0.86598
Cp943	Positive	270.214	10.32	1.44297	1.83562	2.0093	1.36952	1.03531	1.33929	2.37271	1.50179	0.330644	0.586519	0.353393	1.00442	0.971444	1.1109	0.460455	0.61269	1.61215	1.52805	0.963928	0.963908	2.74018	2.4112	1.8014	1.40546	1.47215	1.90434	0.937983	0.847898	1.85013	0.96051	1.6282	1.95306	0.210159	1.27886	0.561112	0.838899	1.50206	0.970432	0.822178	1.12921	1.91945	1.44254	2.20406	1.67173	0.864352	1.82606
Cp1252	Positive	270.216	10.32	1.4657	1.48503	1.22435	0.869913	1.01145	0.452386	1.84289	0.720098	0.115162	0.232174	0.543816	0.758772	1.2388	1.65584	0.71601	0.807506	1.24101	0.974403	0.469752	0.762123	1.80122	1.77495	1.03436	1.07456	1.84863	1.29777	1.77344	0.764728	1.55742	0.291811	1.38258	1.34335	1.16861	1.87531	1.34917	1.05289	0.792587	1.99692	1.07646	1.86425	1.3857	1.12424	1.81364	1.8442	0.602276	1.60683
Cp1760	Positive	271.085	9.43	0.661035	0.464021	0.398198	0.351394	0.33947	0.364515	0.659632	0.416146	0.456016	0.73415	0.561785	0.971228	0.683558	0.708008	0.246732	0.391343	0.424857	0.314165	0.444759	0.241068	0.595527	0.682943	0.603015	0.713548	0.544258	0.425929	0.682382	0.65035	0.670358	0.314706	0.671569	0.712689	0.310904	0.578668	0.644085	0.327928	0.489241	0.79531	0.637987	0.742672	1.05689	0.682693	0.794923	0.614733	0.185256	0.425996
Cp415	Positive	271.178	3.9	4.82638	4.27959	4.16784	1.93162	1.93871	2.26878	0.859316	2.63315	1.67661	1.27728	1.32248	1.11703	1.10397	0.970137	9.09958	0.609909	3.1718	2.49871	3.05765	1.86535	1.55225	1.39961	1.07803	1.32831	0.897283	4.16139	1.13912	0.404665	0.911706	2.95225	0.980622	1.15127	2.785	6.40544	1.19408	3.37334	0.864757	1.21165	0.713838	0.995699	1.35208	1.31004	0.968938	0.837018	2.92712	5.776
Cp1689	Positive	271.249	9.39	1.0165	0.74334	0.964516	0.7999	0.517175	0.618722	0.685981	0.657523	0.571534	0.21328	0.651256	0.490436	0.844627	0.846991	0.688477	0.480139	0.667149	0.718559	1.08563	0.773591	0.689857	1.03249	0.850553	0.821069	0.688334	0.935005	0.869635	0.725571	0.566644	0.913907	0.67124	0.458167	0.91406	0.730534	0.435578	0.490292	0.463633	1.15019	0.708467	0.885097	0.885729	0.97033	0.668594	0.660084	0.674262	0.908452
Cp1342	Positive	272.089	4.09	0.191313	0.555754	0.583918	0.565084	0.54114	0.514728	1.59464	0.333895	0.633389	1.26911	0.522602	0.719344	0.508489	1.26717	1.83741	0.37123	1.07276	0.555866	0.83158	0.976718	1.10431	1.55237	1.39626	1.486	1.45561	1.2452	1.33699	0.230669	0.185587	0.684008	0.900209	1.35926	0.436474	0.395612	0.556944	0.609163	0.756735	1.62336	0.623577	1.12412	1.93699	1.06753	0.953461	2.15258	NA	0.32719
Cp456	Positive	272.089	11.25	3.26753	3.69486	0.456718	0.864383	3.16767	2.72493	5.39175	2.97169	2.46719	8.04363	4.58487	2.22994	1.13632	2.4508	1.95104	2.43279	4.94882	1.20827	3.51859	4.70791	5.2997	9.01757	5.49482	3.05959	2.99277	2.74118	3.1056	0.561732	3.14204	1.7277	1.46485	3.93142	1.52076	1.75788	2.74027	3.07049	4.36848	5.24132	3.84535	3.8217	6.49867	4.52993	6.5366	5.70331	0.85194	1.1362
Cp1101	Positive	272.188	7.84	NA	0.206125	0.48004	NA	NA	0.150079	1.12268	0.198235	1.00689	2.01815	0.896211	2.69598	0.958123	1.56082	0.609377	0.925615	NA	0.210963	NA	0.342693	2.16011	2.61019	2.19004	0.973944	0.983	0.600672	1.36804	0.319875	0.823	0.285579	1.04855	1.51598	0.229073	0.457148	1.43454	0.454937	0.957646	1.44854	0.618861	1.12412	0.912593	1.95729	2.20127	0.837424	0.300616	0.566384
Cp507	Positive	272.233	10.01	7.55097	2.59984	2.37058	1.98305	0.245642	0.249504	1.60381	0.823981	0.711034	2.12191	1.04683	1.70036	1.79337	1.53852	1.29755	1.0158	0.640056	1.28331	1.02229	0.394542	1.6112	3.05789	2.00841	1.36962	0.988862	1.07609	3.33077	1.03043	2.21692	0.402899	1.13739	1.97156	0.0166814	1.23045	1.26708	0.977115	3.03218	0.584514	1.16737	2.14641	1.7943	0.595585	1.56517	1.77002	0.917394	4.34897
Cp419	Positive	272.234	10.87	4.2954	2.64515	2.69209	1.84811	1.56436	1.00568	5.22978	2.11581	2.63043	3.77131	3.34351	4.85614	2.87981	5.2295	4.91046	2.28077	1.5184	1.91468	2.54061	1.19204	4.61256	7.5586	4.13978	5.42622	4.00899	2.37828	5.9158	0.80462	3.43842	1.03312	5.73364	4.7026	0.573734	3.77165	4.68275	2.14701	4.7717	3.91478	2.77387	5.43108	5.28011	5.29128	4.41523	4.81431	1.34121	4.40086
Cp1123	Positive	273.122	3.35	0.39355	0.791541	0.588783	0.764395	0.417035	0.664942	0.989899	0.607048	0.281849	1.03854	0.38434	2.43261	1.06306	1.78206	2.4655	0.860997	1.7393	1.92309	1.22735	1.00734	2.60479	2.25859	1.29814	1.68645	0.700579	2.35414	1.13226	0.354469	0.629849	0.756893	1.32276	2.44727	1.46402	0.514733	1.72526	0.69935	2.05928	1.32207	1.5934	2.37963	1.63247	2.39897	1.15704	2.39842	1.10043	1.13506
Cp1659	Positive	273.19	2.7	0.388974	0.259407	0.301903	0.196436	0.230022	NA	0.579034	0.11305	1.07753	NA	0.503136	0.561491	0.416605	0.591811	0.383332	0.41841	0.245986	0.300257	NA	NA	0.972306	0.736609	0.825854	0.578658	0.422718	0.465223	0.754787	NA	0.491238	0.297501	0.474371	0.536931	NA	0.624397	0.509838	0.221599	0.45432	0.343605	0.504495	0.449479	0.794035	0.532604	0.622998	0.402738	NA	0.320324
Cp406	Positive	275.083	7.06	7.10753	21.6597	3.78009	1.32627	2.68109	1.4809	8.90264	2.27371	3.74548	10.9762	2.18138	1.24793	1.90333	7.17753	1.06907	1.03998	5.72341	1.29126	6.04699	5.77954	9.11818	15.5681	3.03241	5.87494	5.35491	3.93676	4.91321	1.19515	1.08485	2.92353	1.49651	3.36456	2.59966	4.64431	4.16306	1.71409	5.9284	5.8734	2.03802	7.66165	5.44467	9.61592	5.82994	11.0419	1.63973	2.66877
Cp1392	Positive	275.1	2.83	NA	0.687449	0.315067	0.49319	0.394996	0.422827	1.5887	0.454644	NA	0.70773	0.329434	0.458525	0.329614	1.36075	2.01843	0.550854	1.03628	0.359981	0.847058	1.25744	0.718184	1.61364	0.826673	1.39477	1.37185	1.35409	0.776789	NA	NA	0.619116	0.760855	1.07359	0.779427	NA	0.614912	0.597155	0.782576	0.842874	0.739908	1.38026	1.20022	0.828829	1.30289	1.95629	0.360451	0.466942
Cp1275	Positive	275.104	7.91	0.924829	0.092557	0.463157	0.445077	0.367607	1.17416	0.968458	0.225	NA	1.61177	0.643644	1.24651	0.962337	1.3462	0.114543	0.230013	2.50358	1.07527	NA	2.09654	1.66447	2.35895	NA	2.72347	1.2038	3.16402	1.71992	0.298678	0.120796	0.49326	1.03934	0.708471	0.939279	0.458277	0.327978	0.95817	NA	1.33041	0.613751	1.79565	1.60126	1.16295	1.02569	0.495063	1.35127	0.73195
Cp973	Positive	275.136	9.07	1.54128	1.20324	1.22307	0.519404	0.506583	0.700144	2.04412	0.694432	1.41886	1.76564	1.531	1.58179	1.58024	2.12273	1.68681	1.16354	0.463802	0.640252	0.939503	0.532888	2.26013	1.84445	1.94578	2.09151	1.50824	1.06066	2.42555	0.223162	1.23359	0.755131	1.84216	1.57814	0.557578	1.31061	1.45487	0.767523	1.7422	1.45102	0.95161	1.66709	2.05603	2.38302	1.9659	1.61989	0.682885	1.33381
Cp471	Positive	275.993	6.09	2.23878	5.32505	4.95765	2.72422	2.16317	3.9308	4.44124	1.64882	1.33991	5.73694	2.97452	2.35546	2.2267	4.85036	3.94817	3.19108	4.57984	3.25081	2.79877	5.35291	4.96169	5.83066	5.3383	4.30709	5.02143	3.91812	5.16382	1.31306	1.02201	2.39288	1.98545	5.63471	4.59197	2.39823	3.88484	4.97616	4.36615	4.00944	4.94643	6.32551	8.24551	3.77403	7.00859	8.02402	1.98281	3.40631
Cp974	Positive	275.993	3.57	1.74706	1.64227	1.17914	0.620719	0.996477	1.25155	2.04993	1.61166	1.05094	2.46985	1.20006	2.15647	1.36182	2.41524	1.75694	0.59675	2.80575	1.82269	2.2032	2.90356	3.16386	3.24089	2.21611	1.95727	2.35823	1.93881	2.86139	0.517571	0.917685	1.0445	1.42147	2.0608	1.09664	1.89676	2.08797	1.83856	2.06277	2.9113	0.954492	3.10307	2.27754	2.15918	2.68581	3.23747	1.33206	1.80991
Cp1357	Positive	275.993	6.56	0.509726	0.482285	0.701675	0.311797	0.387828	0.399583	0.678618	0.423846	0.191738	0.315276	0.354516	1.28864	1.06047	0.452666	1.52177	0.0716784	0.904053	2.04815	0.606928	0.630121	1.55523	0.973597	0.796379	1.71721	0.443952	0.482791	0.533672	0.368747	0.138733	0.604349	1.35245	0.367703	1.25609	0.572741	1.89197	0.261489	0.357706	0.934914	1.42532	0.559232	0.487907	0.628165	0.831315	0.726552	1.01577	1.16113
Cp1201	Positive	276.172	9	0.736615	0.667536	0.498927	0.535995	0.690387	0.894426	0.657436	0.539462	0.718276	0.88146	0.47456	1.3492	0.548315	1.37222	0.743087	0.653451	1.81349	0.896446	0.750069	0.41089	0.68674	0.952067	0.23089	0.522877	0.680648	0.469246	0.659444	0.598534	0.369588	0.509653	0.523122	1.07781	0.341508	0.82806	0.565532	1.11266	0.818894	1.1176	0.680563	0.848182	1.7639	0.545555	0.719627	0.987824	0.912299	0.618394
Cp523	Positive	278.009	4.4	1.42038	1.57718	0.464874	1.38169	1.78572	1.63676	2.42825	1.96084	1.2574	4.17209	2.27559	1.45628	0.898317	4.40545	2.80396	2.24396	4.69482	2.46821	4.54628	3.70167	3.23338	5.66206	2.77532	3.21259	6.15462	6.00659	5.43877	1.1716	1.77473	1.87658	1.65022	4.31286	2.66048	2.54854	1.0371	2.61329	2.95558	1.98673	2.17178	3.47787	4.56988	2.91044	2.97932	3.83325	2.01456	1.90058
Cp833	Positive	278.062	6.83	1.30436	1.59105	0.498927	0.123436	0.561575	3.00574	0.752241	0.695654	0.330882	1.34581	0.575387	0.347617	0.109826	0.217687	0.219351	NA	NA	NA	0.25078	0.473597	0.951163	0.434082	0.436125	0.425653	1.03068	0.32642	0.379656	NA	NA	0.188038	0.130918	2.21533	0.472595	0.403092	NA	0.45427	0.34723	NA	0.289911	1.30912	0.854521	0.5476	0.726041	1.46597	0.46954	NA
Cp1728	Positive	278.086	8.59	0.216556	0.208871	0.275433	0.224751	0.466463	0.497531	0.217509	0.232822	0.243383	0.318479	0.161847	0.18948	0.254041	0.285724	0.250231	0.124421	0.320952	0.171458	0.188582	0.250462	0.449017	0.314084	0.242216	0.249058	0.251417	0.148458	0.22408	0.259374	0.176314	0.666532	0.209906	0.269486	0.545625	0.319538	0.154959	0.215061	0.239208	0.319823	0.364452	0.286263	0.333797	0.343119	0.307734	0.266822	0.632848	0.224697
Cp1765	Positive	278.097	10.2	0.140533	NA	0.164544	0.223755	0.181664	0.222901	0.363592	NA	0.577826	0.823177	0.341164	0.455972	0.646451	0.50131	NA	0.253121	0.169327	0.153927	0.167992	0.162258	0.352925	0.571019	NA	0.329731	0.530841	NA	0.308344	0.310013	NA	NA	0.574284	0.704254	NA	NA	0.51249	NA	NA	0.595942	0.23633	0.454712	0.744971	0.44236	0.312475	NA	NA	NA
Cp486	Positive	278.223	11.5	5.975	1.89371	1.18043	1.62402	1.08913	1.14272	1.6215	2.46449	0.865137	1.7823	1.11733	2.0033	3.80558	1.20609	1.46062	1.14482	1.08939	0.786231	0.663872	0.628047	2.11728	3.0943	1.52821	0.836187	0.984693	1.26719	2.61811	0.578072	2.12711	0.589582	0.942168	1.30335	0.563882	1.67997	0.887827	1.26662	2.59671	0.599957	2.08492	3.25214	1.87232	0.964877	1.23665	1.06905	0.743896	7.47489
Cp1399	Positive	279.003	5.73	1.57686	1.62181	0.96423	0.696041	0.492996	0.898591	1.73956	0.829481	1.52061	1.81816	1.94578	1.66561	1.41442	1.48745	2.42321	1.28037	1.04182	0.952079	1.17324	0.602793	2.34348	1.83147	2.01838	2.43649	1.17176	1.05315	2.08803	0.781509	1.41515	0.943711	1.31871	1.72887	1.00338	1.59219	1.24877	0.985787	1.39905	1.65795	1.29169	1.65606	2.00423	2.09688	1.35755	1.24003	0.845277	1.61065
Cp34	Positive	279.147	3.85	30.051	27.0791	22.8255	19.8446	36.973	48.9472	50.3697	28.6328	7.6928	8.81893	9.55346	6.07046	6.54117	36.5501	23.8512	15.6313	52.2183	14.3651	18.4507	24.7113	20.6655	26.2569	18.0293	23.108	14.3672	86.3493	34.907	9.69842	11.4414	30.9659	27.4803	19.5217	20.8675	27.7865	16.8107	12.2652	16.5362	14.6621	9.10278	31.5587	20.198	15.0427	12.9269	17.7302	11.6467	10.1985
Cp112	Positive	279.255	11.45	5.02375	6.59311	1.7881	0.680446	1.95262	7.26209	4.51616	5.0182	2.90255	12.9537	3.59333	8.24934	1.72568	5.00906	6.72125	4.01838	11.7385	1.04897	2.20122	NA	5.71863	2.11247	NA	1.17283	7.68996	1.13094	2.16137	7.47519	1.72519	0.806882	0.860769	8.49173	1.10255	12.8963	8.54739	7.38079	9.55318	4.11831	3.00208	1.89197	6.81541	0.768439	2.62041	7.5605	3.33107	5.22996
Cp1296	Positive	280.045	9.84	0.396208	0.632519	NA	0.0601695	0.00802402	0.0768532	0.3685	NA	0.824533	0.665299	0.805242	0.152605	0.387653	0.351499	1.10284	0.161865	0.0886658	0.0456989	0.00781026	0.000731989	0.635916	0.22464	0.303759	1.73285	0.222367	0.0578008	0.417263	NA	0.368855	0.125855	0.19676	0.294244	0.102058	0.514733	NA	0.109532	0.306372	0.219135	0.0273797	0.2997	0.418091	1.71628	0.243315	NA	0.0382792	0.983224
Cp1346	Positive	280.057	6.09	0.726725	1.02156	1.09043	0.755658	0.55997	1.06627	1.01237	0.542762	0.390956	1.17608	0.787397	0.648573	0.609752	1.12108	0.894442	0.765676	0.987177	0.771972	0.834562	0.961468	1.05037	1.43918	1.0914	1.03194	1.10272	0.784267	1.06282	0.363742	0.296134	0.596627	0.480396	1.08706	0.843262	0.579515	0.834027	0.993925	0.97953	0.899395	0.95816	1.15184	1.49364	0.899988	1.25422	1.21972	0.490574	0.638867
Cp1739	Positive	280.089	8.9	0.289922	0.337682	0.365146	0.197984	0.186585	0.228007	0.544548	0.231355	0.435358	0.742156	0.405553	0.965413	0.887035	0.911635	0.68437	0.575781	0.253067	0.234806	0.316529	0.310485	0.571538	0.913915	0.692533	0.582307	0.247899	0.200358	0.602019	0.2738	0.546267	0.222855	0.531887	0.691739	0.245623	0.389825	0.628299	0.297777	0.480278	0.731067	0.583752	0.157417	0.574935	0.658019	0.788369	0.298229	0.313158	0.372842
Cp1775	Positive	280.135	10.05	0.747982	0.458391	0.568894	0.341882	NA	0.296664	0.562631	0.340128	0.259292	0.495091	0.359632	0.341377	0.362236	0.505997	0.635693	0.254191	0.319105	NA	0.22593	0.222647	0.473684	0.694499	0.347017	0.481433	0.347945	0.519537	0.433491	NA	0.212308	0.325815	0.405023	0.448916	0.366464	0.612401	0.406279	0.299645	0.217208	0.530155	0.28323	0.358961	NA	0.416187	0.451353	0.356034	0.30963	0.56969
Cp44	Positive	280.152	4.4	14.9345	12.6494	5.52812	12.5814	9.82087	15.2628	24.5235	17.4081	10.1218	36.6236	14.7694	12.6746	9.2054	41.3893	26.0053	17.6018	46.3873	18.1144	41.5693	30.1414	33.5221	49.3823	23.4599	22.353	60.1649	53.3782	52.2054	8.73085	13.5009	12.2192	14.238	35.3179	18.6586	17.9843	11.6419	16.7841	30.5864	15.6577	21.0756	33.7987	38.4653	26.1122	27.1307	34.1228	13.1432	13.4889
Cp103	Positive	280.24	12.04	23.5645	7.67303	4.48705	6.39367	3.62087	3.55164	4.75898	5.23415	2.53688	5.8471	2.9991	7.313	10.4109	3.47572	4.37729	2.9263	2.22173	2.8096	2.05339	1.6815	8.97777	11.3331	6.69935	2.7786	4.31603	3.43224	11.3588	0.908988	11.2543	2.2215	2.93628	3.30266	1.28801	4.59435	3.79404	3.4782	9.25566	2.33806	7.74768	8.5606	6.45926	3.23475	2.56478	3.95712	1.11127	22.828
Cp929	Positive	280.241	11.56	0.782377	0.234002	NA	NA	NA	NA	0.66919	NA	0.698449	1.61529	0.616067	1.99933	3.29179	1.17069	NA	0.664042	0.825854	0.669704	0.458817	0.312925	1.93553	2.50792	1.68787	0.858082	1.20927	0.59732	1.53985	1.19442	1.41685	0.517917	1.71102	1.91823	0.621019	0.684805	1.72488	0.771926	1.60357	1.32299	1.15349	1.64502	1.70743	NA	1.43159	1.06512	0.194531	0.776457
Cp1528	Positive	281.111	2.75	0.531131	0.80184	0.686794	0.236807	NA	0.563904	1.13986	NA	NA	0.511103	0.766683	0.516107	0.724879	0.979834	1.63357	0.570325	NA	0.222884	NA	0.551432	0.654077	1.21977	0.640405	0.608112	0.446818	0.959547	0.640562	0.234497	NA	0.439206	0.584911	NA	0.424915	0.826226	0.567679	1.03969	0.659539	NA	0.487464	0.58271	0.752693	0.796794	0.910654	0.553138	0.333408	0.791971
Cp1510	Positive	281.112	2.44	0.688492	NA	0.821721	NA	NA	NA	1.32133	0.658256	0.502318	0.648166	NA	0.542912	0.814452	1.10411	1.84669	0.744493	0.449486	0.298504	0.451291	0.530082	0.714795	1.13191	NA	0.65073	0.553507	1.10009	NA	NA	0.628628	NA	0.522903	0.502378	0.443961	0.898065	0.573362	1.25008	0.687941	0.870671	0.5548	0.540421	0.765401	0.882676	0.960014	0.714775	NA	1.19546
Cp14	Positive	281.271	12.14	38.7959	71.3307	22.7894	12.3441	22.59	27.7343	45.5134	53.0774	30.2692	138.266	39.1846	68.531	10.824	51.1233	82.7752	38.9408	135.404	15.739	46.3948	6.30718	14.0285	23.6643	10.5966	17.5402	70.9039	19.5986	13.8811	87.0749	17.0509	13.6586	14.0864	64.6167	9.11328	137.875	90.987	98.3319	90.6462	44.5894	46.2277	16.8096	31.2912	21.918	38.5527	79.332	52.1249	36.0602
Cp2	Positive	281.272	12.01	308.245	581.105	131.222	99.701	229.101	717.606	337.181	465.885	221.021	1192.74	323.8	717.633	58.713	317.343	638.597	353.424	1264.2	134.652	331.751	43.3799	437.74	138.339	46.9	92.8523	604.389	120.142	41.6025	828.817	111.134	64.08	73.1186	569.768	51.4148	1219.09	791.219	787.761	838.672	417.3	336.465	114.703	860.039	122.475	217.013	702.038	284.838	194.91
Cp194	Positive	282.023	7.3	2.22254	5.20654	3.28145	1.17353	1.42325	2.77814	11.3382	2.9074	6.92679	6.09096	7.9481	2.77881	2.97291	8.30071	13.4595	4.24454	3.71996	1.38417	3.02214	1.68553	8.40176	4.73817	4.4127	15.7254	5.43203	4.92675	5.24715	2.04438	2.20459	3.50078	5.85634	4.77633	3.02629	4.62003	3.89747	2.2352	3.2637	5.80561	1.54361	4.54712	6.67948	17.0936	6.43021	4.81674	2.89289	2.1591
Cp859	Positive	282.155	3.37	1.88302	1.19569	0.968237	0.716946	0.780256	1.39182	1.79213	1.18342	0.579488	0.805724	0.495399	1.00229	0.813637	1.65956	1.35824	0.640292	1.31152	0.670873	0.840384	0.852401	1.2923	1.7167	0.964634	0.842443	0.692503	2.37774	1.55249	0.312515	0.739175	0.979341	0.907987	0.936875	0.796239	1.10145	0.615796	0.807414	1.07719	0.740024	0.703882	1.84558	1.63488	1.0284	0.696899	0.863822	0.672041	2.51414
Cp716	Positive	282.166	3.57	1.22863	1.69473	0.858922	0.990805	0.833107	1.0175	1.40128	1.25259	3.8578	1.92496	1.02911	1.24396	1.42352	1.16811	1.26135	0.552245	1.58336	1.24579	1.13661	1.26049	1.78455	1.97759	1.41427	1.08407	1.06168	1.10733	2.0796	0.352702	0.912804	0.984895	1.11997	1.46619	1.13578	0.965247	0.837942	1.30051	1.02795	1.09413	0.904448	2.05702	2.12215	1.26233	1.59737	1.66727	2.19628	1.27773
Cp1284	Positive	282.255	11.49	1.05798	0.62785	0.810703	0.364999	0.706756	1.46894	2.533	1.17902	2.05023	2.74029	2.07331	2.84079	0.693752	0.774267	1.74599	0.865063	1.75007	0.458625	1.0906	1.74884	2.50395	3.04665	2.08715	0.919076	0.498795	1.85727	1.60304	0.484156	0.830687	0.462643	1.5525	1.0672	0.502542	0.864192	1.39211	2.00079	1.4264	1.83879	1.53051	1.02257	3.66324	0.944429	2.41154	0.739954	0.569876	1.11611
Cp126	Positive	283.287	12.96	9.32712	12.3169	6.05151	2.965	7.87991	19.2372	7.68541	9.66412	6.39289	23.7046	7.39904	7.59893	2.72485	5.76071	11.5153	5.33812	28.7762	7.95838	23.8869	2.85024	2.99444	4.15306	3.3756	3.02219	10.2375	3.39952	1.82431	23.6531	4.15466	6.68862	4.96698	8.76761	3.47287	20.8428	15.417	21.1479	12.5217	9.65135	9.72911	5.09461	17.3998	6.03328	6.01567	12.925	13.0886	8.29014
Cp352	Positive	283.288	13.26	5.53539	4.87133	4.7363	3.8243	3.31167	3.94021	8.51554	3.80153	4.34337	7.22846	4.92492	5.31282	5.19472	7.69856	7.12527	4.74608	3.40363	3.75794	3.75787	3.73363	5.8379	8.30391	4.22984	7.23622	6.44186	3.10528	5.91049	3.67069	6.17525	3.50254	7.00524	6.87168	4.01968	6.21067	6.2427	4.75403	4.69569	6.68184	5.54551	6.25508	8.4585	6.63322	8.75349	6.40806	4.24455	6.38803
Cp1866	Positive	283.289	12.49	NA	NA	0.69681	0.479697	NA	NA	NA	NA	0.649891	1.18072	NA	NA	0.932162	NA	NA	NA	NA	0.600046	NA	NA	0.861712	1.17861	NA	NA	0.948088	NA	0.894446	NA	NA	NA	1.00867	NA	NA	NA	0.995932	NA	NA	NA	NA	NA	NA	NA	NA	0.792615	NA	NA
Cp232	Positive	283.323	9.7	6.56488	14.383	8.79755	2.66615	0.325347	0.15505	NA	2.96814	0.558	NA	NA	0.00127644	NA	NA	NA	NA	0.159937	NA	0.743111	NA	0.0337474	NA	NA	NA	NA	NA	NA	0.108637	NA	NA	0.110979	0.470138	0.495318	0.198723	NA	0.246814	NA	NA	NA	0.223466	0.185318	NA	0.205807	0.324085	0.352351	NA
Cp1455	Positive	284.087	12.65	1.27926	1.54449	0.999429	0.724688	0.456941	0.771488	1.9652	0.742341	0.661882	1.00043	0.497396	0.604039	0.383847	0.779439	1.05462	0.695067	0.29663	0.387914	0.504827	0.395762	1.40641	0.826845	0.802247	0.765158	0.925552	0.649622	1.00727	0.547306	0.767117	0.617896	0.837434	1.09263	0.27058	0.727429	0.787931	0.665863	0.543019	0.96024	0.524407	0.679451	1.17304	1.30036	1.08565	2.07217	0.649831	1.30393
Cp921	Positive	284.09	3.55	2.33931	1.80363	0.468594	0.471291	0.842094	0.389506	2.69303	0.912344	1.52251	2.5893	0.808861	2.22739	0.904434	1.71127	1.05629	0.857146	1.06738	0.507246	1.16671	1.84839	1.19471	3.31846	0.878664	1.60499	1.20849	1.0848	1.27114	1.4797	0.341646	1.23471	1.13356	1.601	0.499521	0.672243	1.43088	0.749246	2.24553	1.62398	0.53397	4.28122	1.62378	2.12088	3.28664	3.12606	0.454386	0.690113
Cp1311	Positive	284.092	4.07	1.11732	NA	0.0480756	0.179181	0.412542	0.080884	1.35801	0.438878	1.65203	2.06427	0.478553	NA	NA	NA	0.899614	0.847089	0.0915906	0.457339	0.262425	0.902177	0.261848	1.68456	0.356296	0.170209	NA	0.630042	0.436612	NA	0.0405094	0.278128	0.0978321	NA	0.121104	0.114322	0.379126	1.38402	NA	NA	0.654756	1.17475	0.922567	0.884857	1.37442	1.13687	0.329619	NA
Cp1060	Positive	284.124	4.86	0.422188	NA	0.543712	0.182831	0.197284	0.646803	0.71685	NA	NA	0.433925	NA	1.53471	2.95212	2.17542	1.79908	0.66233	NA	1.39761	0.506957	0.692096	2.14628	0.749432	1.00434	0.6867	0.758158	NA	0.537885	NA	NA	0.354671	1.3244	0.585768	0.253241	0.676195	1.42229	0.325794	NA	0.829593	1.29327	0.838989	0.481472	0.777572	0.68937	0.328282	0.959854	1.06512
Cp1592	Positive	284.126	4.2	0.559621	0.50618	NA	0.25207	0.273138	0.551408	1.2769	0.407591	NA	0.686274	0.356388	0.806	0.647674	0.76247	0.637366	0.20883	0.897434	0.428003	0.431126	0.609137	1.11746	1.17576	0.719552	0.573575	0.953559	0.956999	0.590784	NA	0.533334	NA	0.711118	0.823421	0.251665	0.64585	0.690434	0.348741	0.8899	0.558261	0.441351	0.529106	1.09341	0.691554	0.696899	0.676599	NA	0.299469
Cp1217	Positive	284.126	6.86	0.336865	0.553557	0.066247	0.210482	0.293037	0.284841	0.507608	0.567572	0.135938	0.916847	0.335923	0.424487	0.235963	0.527976	0.57363	0.235469	0.489971	0.190392	0.358278	0.9683	0.442105	1.31523	0.287384	0.384729	0.680779	0.777159	0.485454	0.191955	0.362999	0.0910385	0.355723	0.430551	0.150132	0.0760737	0.285923	0.159295	0.404267	0.720103	0.243798	0.712264	0.614187	0.678604	0.603199	0.514421	0.363195	0.236396
Cp276	Positive	284.126	6.52	3.96089	3.43862	1.16669	2.11058	2.5005	4.88139	6.95319	4.55622	1.34205	4.67134	1.59464	2.29844	2.22506	3.63054	4.14927	1.94388	7.12375	1.90147	5.13446	7.10713	6.1133	15.5726	5.25861	5.13233	7.8257	7.9985	5.16632	1.93692	2.32978	2.7088	3.4456	5.30728	2.68176	4.12943	3.54272	1.74344	5.4494	4.42486	3.24954	7.9605	7.0847	5.47054	5.65858	5.72064	2.4807	1.69292
Cp438	Positive	284.163	10.79	7.85182	6.30363	6.31507	3.50045	3.87774	3.73746	7.67198	3.97435	4.78134	6.17743	4.57252	6.37978	5.35252	8.20633	7.48943	4.70211	4.42113	4.01963	4.82717	3.90577	7.46808	9.91597	7.31547	7.16936	6.38168	6.98947	8.93229	2.19246	4.91177	4.03753	5.8845	6.05003	3.13189	6.90874	6.55375	5.75516	6.8822	7.21323	5.31468	5.95538	7.52387	6.86401	8.28025	6.99342	4.30595	7.22476
Cp1817	Positive	284.233	11.19	NA	NA	NA	NA	NA	NA	NA	NA	0.14045	0.882421	0.150866	2.55359	0.900628	0.349236	NA	0.495009	NA	NA	NA	NA	0.390874	1.13001	1.24492	0.270562	0.193838	NA	0.332999	NA	0.909754	NA	0.802048	0.559785	NA	NA	0.55846	NA	0.391928	0.62899	0.367989	0.769686	1.36849	0.460082	1.15969	0.707058	NA	NA
Cp244	Positive	286.142	7.74	0.00944757	0.281791	0.297325	0.338453	2.47365	5.22158	6.93304	3.67198	0.659745	0.134821	0.660865	0.662897	0.338041	2.20434	4.13558	0.653558	10.2922	0.421809	12.1029	13.2756	0.240705	1.22847	0.0614069	5.21991	3.50225	9.45962	0.0391671	0.451182	0.0236712	2.63646	0.600906	0.274247	2.53649	NA	1.18941	0.541255	0.0751962	2.40925	0.197029	0.41016	0.6055	3.75836	2.99382	1.39192	1.5394	0.0675235
Cp1210	Positive	286.142	9.57	1.32901	0.623043	0.413507	0.379488	0.423026	0.288737	0.653948	0.49632	0.5003	1.34549	0.657496	0.13275	0.57482	0.786227	0.445548	0.807827	1.10894	0.47978	0.260721	0.738943	1.10608	2.02176	1.39025	0.788747	0.902624	0.982077	1.15098	0.0995103	0.667796	0.605839	0.453555	1.11399	0.384722	0.943794	0.54722	0.631309	1.04763	0.676708	0.569079	1.93581	1.28259	0.501796	0.957505	0.949378	0.341377	0.901713
Cp361	Positive	286.142	7.93	2.25059	2.94191	0.697525	0.519183	2.04602	3.18914	7.10625	3.60085	0.904553	1.72801	1.10311	0.845712	0.690083	2.38001	4.68533	1.48663	7.40006	0.768933	7.40569	8.22463	4.35288	11.4193	1.30087	6.96618	6.90236	6.19917	2.61733	0.850548	0.142759	1.84109	2.28268	4.02759	2.05798	0.0540561	2.72991	1.02928	2.98911	3.99184	2.00422	5.81027	6.2178	5.94412	8.06914	7.34878	2.5536	0.476988
Cp1305	Positive	286.143	11.25	1.54173	1.75556	0.344542	0.663191	1.43523	1.27641	2.21139	1.34866	1.02114	3.41216	1.72516	0.727712	0.49612	1.03914	0.692432	0.970548	1.91632	0.552594	1.20846	1.65576	2.29577	3.20606	2.16957	1.20801	1.24028	0.965045	1.185	0.396127	1.20662	0.784123	0.534187	1.54822	0.590415	0.608025	1.06804	1.32586	1.89073	2.20509	1.57506	1.42467	2.97828	1.67374	2.30696	2.16842	0.248227	0.547437
Cp1505	Positive	286.143	9.47	1.04912	NA	NA	0.31047	0.440893	0.153169	0.576193	NA	0.338243	0.978333	0.233848	0.0226923	0.647539	0.383659	NA	0.638366	0.205963	NA	0.214853	0.302556	1.03153	0.912807	0.176169	0.207483	0.89077	0.161467	0.248891	NA	0.181072	0.0731559	NA	0.475443	0.276096	NA	0.168978	NA	0.362711	0.563512	0.715672	0.661913	0.971792	0.219476	0.447449	0.922168	NA	0.555575
Cp862	Positive	286.204	8.24	0.363289	0.36858	0.569324	0.229507	0.331339	0.234322	1.52683	0.286597	1.11125	2.98576	0.899455	3.82705	1.13211	2.04548	0.735481	1.1	0.393916	0.321762	0.459101	0.382952	2.23641	2.88438	2.50908	1.02595	1.02716	0.43773	1.42687	0.473851	0.811897	0.415905	1.17607	1.77499	0.369748	0.456866	1.64355	0.522978	0.939953	1.86705	0.760344	1.54772	1.23304	2.6029	3.30337	1.02695	0.49985	0.783324
Cp1805	Positive	286.213	9.72	3.94451	1.74032	0.444699	1.23701	NA	NA	NA	0.562439	0.106495	0.257953	NA	1.39827	0.614237	0.159669	0.327658	0.100136	0.308791	0.47604	NA	0.558142	1.08819	1.34277	0.645864	0.0931848	0.669055	NA	1.78764	0.382732	1.21101	0.0555443	0.164332	0.370424	NA	0.751422	0.251698	0.259621	1.24935	NA	1.11838	0.940115	0.272829	0.189486	0.254052	0.417764	NA	2.18911
Cp1857	Positive	287.13	9.66	0.296713	NA	NA	0.246208	NA	NA	NA	NA	NA	0.130178	NA	NA	NA	NA	NA	NA	NA	NA	NA	NA	NA	NA	NA	NA	NA	NA	NA	NA	NA	NA	NA	NA	0.188355	NA	NA	NA	NA	NA	NA	NA	0.600996	NA	NA	NA	NA	NA
Cp1507	Positive	287.137	3.97	0.745472	0.431338	0.57519	0.190795	0.472454	0.526418	0.694634	0.539829	0.281612	0.968566	0.501139	1.34593	0.984221	1.04448	1.24963	0.483455	1.14665	1.06054	0.898038	0.538012	1.38215	0.868638	0.73429	0.311355	0.763629	0.538982	0.909739	0.105251	0.385328	0.334891	0.536817	0.647392	0.270842	0.73138	0.689171	0.535519	0.861381	0.813532	0.753663	0.624857	0.73741	0.717864	0.677936	0.776235	0.29957	0.718216
Cp452	Positive	287.245	9.55	11.0138	10.3716	10.2847	7.06294	6.31758	5.98783	9.2475	8.7233	3.21336	3.94023	6.29094	5.74256	6.40321	15.2458	2.02193	11.1184	8.37215	13.6448	9.71994	7.22315	13.5353	8.53568	9.7686	7.13131	10.9874	10.8287	3.68764	8.58408	6.57644	11.204	11.9594	6.26007	7.57373	19.9895	4.15599	4.63476	2.90041	14.7004	9.63033	6.33414	5.49406	4.96425	7.1002	14.9326	5.1771	8.8157
Cp662	Positive	287.245	9.54	4.54812	9.20091	NA	NA	NA	5.17953	8.00651	8.07238	2.33766	NA	5.43067	4.89755	5.58373	14.2594	1.08109	10.5055	7.24366	13.0646	8.81054	6.17579	12.5924	7.75965	NA	6.26019	NA	NA	2.68474	7.73398	NA	10.168	11.1392	NA	6.8031	NA	3.42716	NA	1.97489	13.3249	3.98775	5.35117	4.60158	4.08634	6.4383	14.1236	NA	7.98812
Cp324	Positive	287.246	9.55	10.0535	9.53928	9.32738	6.38924	5.93179	5.02435	8.38444	8.07103	2.43454	3.02435	5.69809	4.76551	5.6502	14.4808	1.21982	10.726	7.54737	13.1169	9.06729	6.3555	12.0691	7.80097	8.87152	6.23986	10.0986	10.0197	2.73234	7.9723	6.0342	10.026	10.9918	5.41475	6.69802	18.8868	3.41479	3.79372	2.15031	13.6989	8.79361	5.49487	4.76469	3.77417	6.52503	13.872	4.66888	8.22554
Cp1316	Positive	288.02	3.98	0.81382	1.00302	0.504221	0.567296	0.452662	0.660373	1.0218	0.809682	0.357951	1.44348	0.527594	0.706864	0.837287	1.35848	1.29283	0.594824	1.56166	0.680691	0.867507	1.37419	1.37619	1.9225	1.12593	1.50686	2.40865	1.37421	0.852471	0.43337	0.393259	0.6118	0.611642	1.00897	0.738052	0.938431	0.799171	0.831562	0.809465	0.857236	0.996937	1.7849	2.31776	1.32122	1.94847	1.98323	0.640294	0.827195
Cp1523	Positive	288.063	5.87	0.756101	0.552183	0.688511	0.467419	0.740671	0.333613	0.838263	0.421157	0.639444	0.889146	0.397817	0.477246	NA	0.974501	1.06998	0.45564	1.23178	0.407199	0.737431	0.656838	0.888954	0.893651	0.820123	0.564583	1.11418	0.669604	1.08139	NA	0.267338	0.359683	0.49179	0.935922	0.569268	1.17413	0.399459	0.326594	0.70156	0.587757	0.6579	NA	1.36495	NA	1.08857	1.16679	0.108436	NA
Cp687	Positive	288.084	1.59	3.508	2.49162	1.79654	2.98735	1.96086	3.26478	5.28984	2.95115	1.45721	2.22919	1.34132	3.82932	2.30675	4.27956	4.40072	1.98934	5.54562	1.3553	2.38469	2.6975	5.25837	5.65098	3.04796	3.58859	4.85273	4.17587	4.34131	0.735581	2.55917	2.01477	2.39519	4.37462	1.56529	3.10392	2.00045	1.42085	3.64259	2.47503	2.12645	3.48919	4.19491	3.40188	3.43263	4.41793	1.61648	1.45932
Cp56	Positive	288.157	6.09	6.71294	17.4927	15.3819	7.7101	6.01673	14.6036	17.9625	3.69557	3.4146	18.8837	7.42637	5.55776	5.30767	13.8786	13.4598	11.9859	12.6637	8.63229	7.51574	19.3923	20.2139	18.2675	16.0374	14.2148	16.7393	10.6262	17.8789	2.45964	1.87576	5.44605	5.37244	21.0946	12.4247	4.63471	12.3981	12.3754	17.2802	10.5418	18.3166	22.6045	32.3862	12.8159	34.4342	51.397	4.54294	7.37889
Cp160	Positive	288.157	8.1	2.61343	6.57045	2.96867	1.15251	1.48594	3.43784	6.75376	1.38838	1.05236	9.23012	3.74544	2.6913	1.82192	4.14316	4.24115	3.35102	3.57188	2.8608	3.12368	6.68818	6.29519	7.02589	4.61916	5.31531	9.88301	2.63818	4.72487	0.793285	0.544681	1.69342	1.70741	6.26129	3.06123	1.53446	2.2769	3.96903	3.84991	4.39088	2.82339	5.47351	12.8542	3.64835	9.32978	22.6612	1.15791	1.52303
Cp868	Positive	288.158	8.91	0.494374	1.92378	1.39076	0.963596	0.39981	0.841489	1.04273	NA	0.0612612	2.17635	0.302106	0.355985	0.757093	0.843436	0.881208	1.23833	0.392377	0.620149	0.114598	0.349647	0.684436	0.532708	0.838954	0.691522	1.07953	0.180912	0.292271	0.522429	0.137268	0.0804715	0.324281	1.03795	1.01441	0.373876	0.337703	0.331531	0.446172	0.304071	1.83798	0.808439	2.85505	0.653384	2.09488	3.90527	0.338634	0.416713
Cp1537	Positive	288.159	7.6	0.262465	0.372974	0.168408	NA	0.262974	0.115011	0.495079	0.231233	0.31343	0.46739	0.439994	NA	0.294274	0.358448	1.31033	0.934066	0.849868	0.274544	0.309428	0.70759	NA	0.438673	0.237849	0.410143	0.651989	0.517927	0.118594	NA	0.0610082	0.382714	0.198513	0.33315	0.526579	0.0869414	0.237806	0.575276	0.202192	0.388698	0.289125	0.252036	1.33213	0.490481	0.853346	0.775422	0.279843	NA
Cp592	Positive	288.263	11.63	NA	13.1576	4.91773	3.87075	NA	NA	30.3303	3.23824	NA	NA	3.36509	NA	10.3247	2.47665	NA	NA	NA	8.8775	16.6897	4.95081	NA	14.1189	27.1406	7.03421	2.07503	5.39023	8.0625	30.125	NA	10.087	18.5557	NA	9.67795	NA	NA	5.91245	NA	15.4895	18.6025	5.58638	37.7069	36.5684	14.5314	0.729395	4.4008	30.4234
Cp925	Positive	288.264	11.12	0.56154	2.22041	2.1149	1.57016	0.551625	0.957709	3.76146	1.62254	1.1065	0.69364	1.15227	1.30466	1.91761	1.86965	1.8905	0.669177	1.04983	1.61419	2.97159	2.02859	0.720216	3.22189	3.71989	1.82486	1.22999	1.23058	2.32491	3.17535	1.26019	2.65502	0.430439	0.625354	1.94082	0.162733	0.208507	2.91854	0.706682	2.35906	0.18668	1.50288	2.60265	0.39533	1.48736	1.5698	0.211777	0.132249
Cp1801	Positive	288.265	11.97	NA	NA	1.57133	NA	NA	0.289946	NA	0.280853	NA	0.304548	0.164467	NA	NA	1.75572	NA	NA	0.453335	NA	1.2238	0.83581	NA	2.48703	NA	NA	NA	0.805992	0.854811	NA	NA	NA	1.75627	NA	NA	NA	0.414867	0.200386	NA	1.68528	NA	NA	NA	NA	NA	NA	0.787401	2.5706
Cp279	Positive	288.265	11.35	9.78695	11.8761	5.38718	6.97048	1.03371	2.98693	6.68001	7.99379	8.02368	7.3652	8.27054	8.84771	8.99935	10.7693	12.0836	5.39001	1.43636	3.91362	6.44361	11.3729	NA	18.5697	17.2733	3.09426	8.91109	11.5158	13.9151	10.6104	5.62495	12.7123	12.947	6.55064	4.4907	7.74668	6.55072	4.01079	2.57832	9.94153	3.20159	10.1602	11.3903	19.2196	14.3959	2.20457	3.8159	4.69867
Cp918	Positive	288.266	11.78	3.28288	8.13073	7.92961	3.41926	1.52777	1.29428	16.1074	8.84808	2.51385	1.40906	3.41064	2.93283	5.668	3.78746	8.45537	0.179303	2.51189	5.5721	8.89802	7.52558	0.282177	11.8459	10.1205	5.06222	4.48394	10.1969	4.62344	8.19473	1.73031	9.22726	7.87784	2.83076	5.05997	4.82017	1.45967	8.86221	1.35295	6.09115	7.75108	4.96859	31.1144	18.0048	7.35913	1.75756	4.12971	16.952
Cp294	Positive	288.266	11.79	4.81811	9.37819	8.2484	4.9256	3.35169	2.05461	15.6954	7.57581	3.98483	0.84063	4.72713	2.87965	6.09983	6.15455	5.56486	1.66519	4.6351	6.55656	10.2253	8.73544	2.70833	13.1108	11.5321	6.43692	0.421025	12.5358	6.50892	2.99296	2.73402	4.70135	3.42423	2.76696	6.76987	5.08819	0.816978	11.4411	2.44341	3.13784	11.0188	4.8744	26.6954	8.01497	3.09854	3.16274	6.44958	13.781
Cp173	Positive	288.266	11.48	4.9368	18.008	11.8415	8.26688	8.21799	3.62701	23.189	9.45256	10.7379	12.8855	12.17	10.7394	7.16221	14.7235	13.0348	7.30735	10.1427	6.48433	17.4244	11.9802	11.5481	22.9821	44.385	7.35404	13.5504	17.6789	10.5555	14.6929	7.80246	17.2904	15.9374	6.83767	13.1738	NA	6.45032	14.3208	8.74535	13.5303	29.2864	11.478	15.6082	30.5658	22.4243	16.99	10.379	20.8611
Cp84	Positive	288.266	11.62	1.1123	17.487	10.6153	5.89484	1.62941	1.97588	28.2718	6.55054	3.9314	0.859204	8.9938	4.53249	13.2637	7.4159	7.59561	1.20249	1.70112	8.02897	14.7752	8.9166	0.769686	15.9447	19.8889	15.3055	9.97785	9.17718	9.4502	21.943	3.52749	22.3296	14.9039	2.9804	10.6745	1.65316	3.78899	13.2836	2.59625	17.3958	19.3742	9.01079	42.4445	40.3715	13.1737	4.80618	8.42103	33.0601
Cp1572	Positive	290.045	3.89	0.834782	0.583768	0.332809	NA	0.415644	0.199254	0.198522	0.172447	0.791528	0.783947	0.506755	0.364352	NA	NA	0.480535	0.459277	0.501208	NA	0.216841	0.267908	0.549988	1.6043	0.572039	0.682139	NA	0.309523	0.34517	NA	0.628506	0.461289	0.186681	0.668069	0.511343	NA	0.426738	NA	0.442098	0.328471	NA	NA	0.779879	0.863318	0.655069	NA	0.146584	0.216559
Cp281	Positive	290.079	3.62	1.14138	4.4014	3.53298	3.75362	7.79379	8.57007	12.7182	6.8936	1.98315	3.18911	2.54176	1.67965	2.79567	8.21441	10.1486	2.50158	5.78267	1.38932	5.51475	4.8637	3.72672	8.65061	2.25704	6.32823	7.17423	11.4899	1.55186	1.1691	0.714772	3.71551	5.61028	4.97018	3.23723	2.52737	2.35142	1.82429	1.51289	2.51719	1.20196	2.45233	6.44703	4.17359	4.59078	3.56954	1.47551	0.170653
Cp1564	Positive	290.082	8.01	0.368603	0.348256	0.254114	0.171217	0.125282	0.0659702	0.621529	0.245043	NA	0.316557	0.263797	0.542912	0.309633	0.499209	0.44068	0.283932	NA	0.149252	0.0137745	0.0769809	0.575875	0.697032	0.82831	0.425653	0.620334	0.166026	0.45799	0.0394508	0.316877	0.240873	0.386946	0.587808	0.00236429	0.14255	0.199793	0.081782	0.184615	0.368468	0.187204	0.635606	0.442704	0.389468	0.572941	0.334103	0.0855729	0.399673
Cp1714	Positive	290.089	5.38	0.221132	0.292914	0.496781	0.42185	0.383762	0.67569	0.600863	0.427145	0.278406	0.521511	0.268788	0.497244	0.24738	0.45202	0.726354	0.321162	0.419623	0.286699	0.467906	0.391248	0.717912	0.890168	0.328049	0.834753	0.587898	0.637954	0.361867	0.0694805	0.333837	0.39179	0.405899	0.745745	0.326272	0.536468	0.608597	NA	0.328722	0.335574	0.501219	0.235913	0.777466	0.301541	0.468504	0.737924	0.303229	0.22546
Cp81	Positive	290.119	10.43	17.5746	19.2931	12.7704	4.67154	4.80821	9.31241	31.9882	7.18851	36.425	27.1195	35.3534	15.9068	20.029	30.0284	47.2477	15.1295	9.11934	5.62073	9.21028	4.58006	35.3821	19.7643	18.407	61.1735	20.6334	10.6981	27.8956	6.32332	13.4917	10.8554	20.1837	20.9441	8.77702	24.1525	16.8567	8.80978	18.4308	20.2716	8.86082	17.4082	24.2792	57.9777	22.473	15.0549	9.50186	22.3327
Cp1215	Positive	290.12	11.31	0.821348	0.964845	0.366004	NA	0.103456	0.18743	0.586138	NA	1.43192	1.16824	1.93143	0.53029	1.01589	1.06306	2.86541	0.506028	NA	NA	0.119994	0.14164	0.886921	0.747216	0.579135	4.20218	0.746955	NA	1.02568	0.241563	NA	0.322699	0.386508	0.721939	NA	0.617905	0.255361	NA	0.643591	0.614164	NA	0.634333	0.783579	1.73304	0.608915	0.613244	0.293299	0.710587
Cp1111	Positive	290.12	11.36	0.450679	0.622494	0.192732	0.0662528	NA	0.198717	0.795252	0.19579	1.65097	0.683072	1.093	0.333292	0.576451	0.506159	1.4159	0.249484	0.0805073	NA	0.135615	NA	0.928936	0.4268	0.313994	2.56591	0.484856	NA	0.504023	0.111875	0.269046	0.142248	0.334689	0.508228	0.155386	0.637806	NA	0.138082	0.439421	0.383756	0.161003	0.371124	0.491929	2.09157	0.442569	0.339247	0.150765	0.654381
Cp1493	Positive	290.236	9.4	NA	1.21176	1.90356	0.99357	0.667385	NA	1.01702	NA	NA	NA	0.857153	NA	1.4117	1.41602	NA	0.726306	0.924064	NA	1.14186	1.15813	NA	1.64372	NA	NA	NA	1.61695	1.36742	NA	0.936964	NA	1.1111	NA	NA	0.958755	NA	0.776062	NA	NA	NA	NA	1.30462	1.33976	0.879839	0.852856	NA	1.6357
Cp227	Positive	290.245	10.49	0.659116	0.448778	0.599371	0.773244	1.43256	0.29438	0.628633	0.239177	0.499113	0.0718939	0.262299	0.309891	0.657189	0.50632	0.852763	0.647888	0.644982	0.332047	0.532234	0.168236	1.27739	0.181896	0.946894	1.39504	1.93695	0.0795264	0.789429	0.845101	0.756624	0.340175	0.7499	0.482789	4.23864	1.17343	0.26559	0.565537	0.377494	0.30299	0.367334	0.913242	0.199474	NA	0.837172	14.6155	0.312896	1.00192
Cp1348	Positive	291.167	8.54	0.379527	0.535842	0.575476	0.413001	0.220393	NA	0.285707	NA	0.914051	NA	0.233474	0.105519	0.551984	0.285239	0.203075	NA	0.1898	NA	0.524565	0.435046	NA	0.924838	0.793786	0.238762	NA	0.861782	2.03825	NA	1.45199	0.362122	0.53353	0.120527	0.640459	NA	NA	0.591685	0.435929	0.553319	NA	0.874206	0.660677	1.10501	0.384982	0.240154	0.493579	0.522131
Cp823	Positive	292.183	3.36	3.64189	2.97308	2.31307	1.557	1.74613	2.18481	2.71654	2.06985	1.19851	1.26207	1.03859	1.33884	0.933113	2.25234	3.52529	1.43731	1.9251	1.17602	2.41891	2.24855	2.38319	2.55478	1.05729	2.17349	1.29851	2.74158	1.85771	0.617229	0.90829	1.7254	2.04461	1.15195	2.17409	2.78114	1.76315	2.44972	2.11294	2.14703	1.34803	2.01756	2.14644	2.69424	2.43385	2.1871	2.01142	3.03182
Cp180	Positive	292.184	3.59	16.8286	10.3879	7.91373	5.04472	4.3089	5.04867	8.49384	5.25957	3.93948	7.69168	3.69702	8.42861	5.46004	7.46374	8.51211	5.18824	4.7741	3.9959	6.50623	3.71033	10.2351	10.6682	5.66663	7.04777	4.02201	6.17717	13.9188	2.47937	5.19961	4.16555	6.89251	6.38808	5.3182	8.36825	6.34411	7.80424	9.53176	6.10366	5.55154	8.12555	7.65707	8.32169	8.6669	9.62699	5.55362	15.7704
Cp1198	Positive	292.188	6.56	0.238699	0.106564	0.319359	0.271647	0.0955394	0.32797	0.224226	0.237344	NA	0.263878	0.209515	1.50138	1.02744	0.506967	2.42321	NA	0.323415	1.91409	0.142005	0.412842	1.55631	0.550122	0.697173	1.98464	0.417638	0.712116	0.770859	NA	NA	0.243176	1.64825	0.264861	0.900137	0.381074	1.73802	NA	0.219419	1.22632	1.15244	0.482433	0.541797	0.347208	1.00826	0.358606	1.08018	0.898534
Cp725	Positive	292.201	9.55	5.19882	4.68827	4.92031	3.5542	3.07727	2.73151	4.23898	3.86227	1.67649	1.92064	3.29983	3.06728	2.77583	6.81213	0.91726	5.02733	3.91884	6.63837	4.58704	3.52087	6.49482	4.20847	4.66023	3.51861	5.26464	4.65866	1.68778	4.51447	3.00807	5.34119	5.66802	3.06759	3.79179	7.9303	1.92114	2.29883	1.42407	6.89526	4.64276	3.31565	2.43278	2.3439	3.3887	6.50959	2.99283	4.55688
Cp998	Positive	292.201	9.54	4.12888	3.54573	3.91101	2.72156	2.2862	2.11387	3.32373	3.00591	1.1509	1.13877	2.43245	2.17434	2.01438	5.56241	0.526778	4.15863	2.96969	5.56264	3.88837	2.64431	5.08624	3.15081	3.77693	2.58558	4.10838	3.82276	1.07764	3.51466	2.38859	4.04186	4.67491	2.27002	2.8952	6.6609	1.28312	1.50916	0.855677	5.78708	3.79177	2.43437	1.87618	1.74886	2.57273	5.58039	2.28591	3.76008
Cp952	Positive	292.209	9.56	NA	4.46292	5.08643	3.1506	2.96482	NA	3.72039	3.45969	0.726112	1.18361	2.62948	2.71853	2.58377	6.73731	NA	4.87574	3.38223	6.50209	4.60607	3.09692	6.407	3.97639	4.41147	3.34996	4.83006	4.52227	NA	3.97393	2.98001	NA	NA	2.66085	3.34691	7.94921	NA	2.19597	NA	NA	NA	3.24988	1.05062	NA	2.99201	6.62304	2.65041	4.73351
Cp922	Positive	292.211	9.56	2.46464	4.26641	4.71098	3.06488	2.94824	2.61919	3.67634	3.54182	1.46576	1.31907	2.70448	2.75626	2.22371	6.32957	0.457413	4.81701	3.09684	6.37902	4.46463	3.14963	6.20546	3.02702	4.30312	3.43011	5.04917	4.3309	1.32279	4.07418	2.77404	4.96566	5.24317	2.63704	3.51464	7.02504	1.61097	2.04308	1.11572	6.82515	4.46643	2.99728	2.12794	2.13069	3.15125	6.69438	2.61017	4.25551
Cp1663	Positive	293.093	3.34	NA	NA	0.308342	0.24842	0.236976	0.433979	0.507478	0.258243	0.112787	0.334651	NA	0.461645	0.243031	0.500341	0.756625	0.214928	0.580176	0.387914	0.54118	0.541794	0.631037	0.607271	0.428483	0.534737	0.659936	1.06214	0.657259	0.243182	0.177778	0.340446	0.424743	0.286762	0.346105	0.241912	0.374453	0.235207	0.572586	0.534788	0.348338	0.505345	0.692529	0.614669	0.365321	0.786658	0.240649	NA
Cp747	Positive	294.077	8.32	0.478726	1.3061	1.71198	0.687967	1.32482	1.74116	3.88752	1.45303	1.87108	1.55541	1.8331	0.595388	0.69049	3.53261	3.04734	1.76489	1.82935	0.686418	1.93822	1.49253	1.92753	2.40486	1.30524	3.38293	2.72833	2.82795	0.801756	0.858497	0.432304	1.45973	2.27873	1.38906	1.26371	1.59458	2.25695	1.43966	0.784322	2.53866	0.720519	1.12907	2.77977	3.43664	2.80349	2.2533	1.53156	0.331387
Cp1227	Positive	294.094	6.65	0.275603	0.539962	1.39705	0.460672	0.43747	0.413288	0.549585	0.279019	0.274607	0.685794	0.158603	0.350028	1.22943	1.72889	0.620329	1.01741	0.886196	0.37833	0.229054	1.12824	0.603795	0.174456	1.33212	0.536692	2.08793	0.465759	1.02974	NA	0.219385	0.405067	0.588636	1.81934	0.8849	0.315586	0.111641	0.423185	1.15146	0.566909	1.22737	0.530238	2.20612	0.606354	0.47924	1.72006	0.174673	0.122458
Cp1818	Positive	294.095	6.57	0.529359	1.16767	1.38189	NA	0.390502	0.0869301	NA	0.0367871	0.0745582	0.682431	0.412541	0.388605	NA	2.11724	0.223002	0.948616	1.31336	0.863954	NA	1.35442	0.486695	0.483316	1.30346	0.752255	1.78245	0.321458	1.10838	NA	NA	0.358464	0.468893	1.96149	NA	0.73505	0.691192	0.64385	1.30185	0.496181	1.73174	NA	0.861599	NA	2.73127	2.34278	0.423423	NA
Cp1042	Positive	294.096	3.64	1.73068	NA	2.64917	1.92686	2.0258	3.15206	4.61083	1.75075	1.62627	0.607335	0.968087	1.91437	1.29236	3.22442	NA	NA	2.46925	0.903575	0.891364	1.4325	0.840433	0.441047	2.90291	1.79045	2.96242	1.17881	0.98386	0.11482	1.099	0.521981	1.74728	1.66562	NA	2.47614	0.159885	0.893999	1.36284	1.97376	1.84178	2.5734	3.16408	NA	2.12277	1.93558	0.421594	0.853518
Cp1672	Positive	294.101	8.59	0.95199	0.592694	0.477751	0.424726	0.67038	0.697188	1.24525	0.258854	0.558593	0.909962	0.595477	0.738633	0.653791	0.986298	0.790699	0.562301	0.50167	0.278634	0.471456	0.55009	0.694872	1.30858	0.998476	1.04224	0.869276	0.798616	0.938295	0.762814	0.816045	0.543521	0.940087	0.93361	0.662788	0.62228	0.508953	0.392233	0.645919	0.602891	0.69314	0.75823	1.00927	0.651067	0.938262	0.882909	0.412187	0.476607
Cp999	Positive	294.121	3.52	0.20578	NA	0.110459	0.212584	0.323743	0.465284	0.763865	0.255676	0.459697	0.561221	0.313961	0.368891	0.378003	0.463494	0.549443	NA	0.515062	0.31884	0.222379	0.368557	0.571402	0.644315	0.395324	NA	0.365792	0.70863	NA	NA	NA	NA	0.337428	NA	0.22001	0.237113	0.482053	0.228136	0.439072	NA	0.438731	0.391632	0.522171	0.282593	NA	0.394751	NA	0.125256
Cp551	Positive	294.132	3.71	0.270289	0.536116	0.422951	0.256826	0.256876	0.520909	0.571414	0.295885	0.0734897	0.220645	NA	0.491996	0.349051	0.586478	0.735329	0.166572	6.87022	0.561009	0.358846	0.360139	0.452134	0.867214	0.37349	0.39685	0.187325	0.772197	0.433491	NA	NA	0.225835	0.36131	0.737175	0.352147	0.474367	0.441009	NA	0.281113	0.483826	0.43074	0.3096	0.365649	0.515155	0.972703	0.563021	0.101381	NA
Cp594	Positive	294.141	9.04	4.28639	3.72398	4.42567	3.27005	3.43813	4.90772	4.2878	3.98058	2.79593	3.55739	1.7913	1.60207	3.77717	4.52989	5.0107	2.36197	3.71457	1.48866	1.62539	2.31589	2.72758	3.00549	2.66015	3.15082	2.915	4.32044	3.82387	2.10282	3.13936	2.67493	2.82902	3.44591	2.63973	2.94415	3.82246	3.84482	2.0069	2.1634	1.79855	3.65467	2.7743	2.83465	2.86889	1.68067	3.11943	3.71176
Cp622	Positive	294.216	10.43	3.81815	1.63897	0.926314	1.05031	0.580939	0.851969	0.619075	0.859424	0.469076	1.32804	0.236094	1.03874	1.34116	0.390932	0.826447	0.580595	0.290165	0.336138	0.472024	0.424188	1.41915	1.834	1.08567	0.101526	0.772487	0.237909	1.62973	0.400102	4.9125	0.192644	0.435588	0.750914	0.497945	1.08126	0.766714	0.541522	1.03901	0.162768	0.97126	1.56596	0.98627	0.711457	0.494718	0.471914	0.128555	3.52776
Cp1500	Positive	294.216	8.04	NA	NA	NA	NA	0.485079	0.146317	0.678231	0.14006	NA	NA	0.399813	NA	NA	NA	1.53759	0.318702	1.26718	0.516245	NA	NA	NA	NA	0.422479	NA	0.23865	0.525571	0.705165	NA	NA	NA	0.45739	0.220241	NA	NA	0.395797	0.36435	NA	NA	NA	0.391349	0.58684	NA	NA	NA	NA	1.13086
Cp388	Positive	294.217	10.52	3.09364	1.12002	1.68951	0.522169	2.06934	4.08048	1.09052	0.565005	0.590767	0.860165	0.606209	0.883154	NA	0.876889	2.17906	NA	1.66202	1.07632	0.203209	0.110042	1.94095	1.13475	NA	1.13842	NA	0.876399	0.392608	NA	1.23493	1.03719	0.598605	NA	NA	0.486505	0.356267	NA	1.11165	NA	0.609952	1.1947	0.590218	NA	0.0132464	NA	0.618215	2.90962
Cp1089	Positive	295.155	4.41	0.703992	0.647075	0.147804	0.719047	0.510863	0.693426	0.838909	0.747841	0.555744	1.30482	0.949744	0.729981	0.307866	1.25764	1.03865	0.770383	1.34107	0.812177	1.6305	1.07493	1.21681	1.66984	1.03123	0.942665	1.75028	1.64176	1.61319	0.384351	0.598002	0.549347	0.47196	1.05672	0.90828	1.05529	0.49001	0.917746	1.22526	0.767821	0.997199	1.61165	1.34564	1.15205	0.989296	1.28781	0.65153	0.665952
Cp773	Positive	295.286	12.52	0.926748	1.16012	0.236372	0.304608	0.264365	2.07557	0.690889	0.739285	0.428354	3.37821	0.601592	1.435	NA	0.442162	1.68742	1.09786	2.49727	0.504908	0.841804	0.0739309	0.80262	0.354928	0.127453	0.215433	1.95167	0.247967	NA	2.36764	0.289789	0.111901	0.32954	1.40334	0.107706	4.04517	1.89222	3.30023	2.66656	0.60459	0.757986	0.346656	2.27706	0.486528	0.439919	1.89348	0.542049	0.276707
Cp619	Positive	296.075	10.69	2.49741	2.16273	0.3909	0.204842	NA	0.0163918	0.226163	0.338417	1.41257	0.969046	0.844424	0.362934	0.876162	0.309966	1.80912	0.0212896	0.00246294	0.166199	NA	NA	1.21057	0.331181	0.462735	2.391	0.142643	0.0315155	0.908647	NA	1.73202	0.0233015	0.120948	0.372873	0.043608	1.73403	0.232123	0.237208	0.466077	0.277818	0.414757	0.672804	1.10483	2.50339	0.12117	0.0442673	0.0461179	4.38547
Cp1241	Positive	296.075	11.44	0.832863	0.726311	0.266133	0.106845	0.0446136	NA	0.0725892	0.182835	0.29669	0.508221	0.176073	0.190048	0.315886	0.160639	0.409953	0.00759578	0.20858	0.0563347	0.0685883	NA	0.373119	0.156567	0.169074	0.438816	0.0789422	0.0378186	0.364208	0.0529936	0.637658	0.125178	0.000876435	0.0670654	0.116901	0.718537	0.0838573	0.126075	0.26179	0.0813841	0.118558	0.270847	0.643625	0.319399	0.0418307	0.0180047	0.0891003	1.44495
Cp1782	Positive	296.076	7.75	0.202089	0.368992	NA	0.213248	0.213653	0.329313	0.497145	NA	0.2511	0.376922	NA	0.241105	0.38276	0.332268	0.356104	NA	NA	0.221014	NA	NA	0.501061	0.622944	0.415247	0.446505	0.439132	0.519805	0.602799	NA	0.285884	NA	0.284622	0.352603	0.276884	0.460959	0.284029	0.2807	0.308118	NA	NA	NA	0.642178	0.443996	0.48914	0.527553	NA	0.219865
Cp891	Positive	296.092	8.21	0.782672	1.17193	0.169982	0.374289	1.14957	1.27171	2.78435	1.11816	1.34098	1.26943	0.461333	0.925986	0.430877	0.564661	0.718748	0.607234	1.67341	0.51531	1.94404	1.19936	1.44518	1.67253	0.976642	1.0945	1.43724	1.54091	1.68107	0.259816	0.671578	0.616677	0.551716	1.47381	0.566378	0.386296	0.672501	0.420917	1.74511	0.907425	0.45825	1.35607	1.88809	2.25106	1.2743	1.26439	0.605935	0.448504
Cp1781	Positive	296.104	9.44	0.300994	0.260231	0.346402	0.243443	0.19707	0.27127	0.442768	0.17208	0.277575	0.565704	0.349525	0.468595	0.433459	0.495008	0.209007	0.302119	0.3659	0.220079	0.268247	0.202151	0.350079	0.554713	0.453728	0.377561	0.279164	0.323604	0.371074	0.310454	0.364097	NA	0.391	0.40144	0.317077	0.385873	0.357783	0.229203	0.281462	0.498497	0.308775	0.458955	0.563192	0.446995	0.576845	0.335457	0.294737	0.274418
Cp953	Positive	296.11	1.3	0.582797	0.983933	2.02733	0.767382	1.23912	1.31967	1.23272	1.41135	0.497688	0.956237	0.494151	2.32581	3.19338	1.7179	4.07215	0.576316	2.17539	1.61699	0.839674	1.19888	1.97809	2.06672	1.94018	2.47064	1.74702	2.59004	1.63893	0.379346	0.669992	0.789948	1.1214	1.44184	0.847991	0.871108	1.24574	0.854642	1.02679	1.0932	1.27414	0.78086	1.82454	1.04721	1.45808	1.09761	0.878984	0.833426
Cp1288	Positive	296.148	3.63	1.03392	0.989563	0.688082	0.460672	0.652193	0.992777	1.8022	0.83107	0.565835	1.31907	0.390829	0.596948	0.651208	1.60591	1.50245	0.474148	1.83397	0.491818	1.38298	1.4142	1.66731	2.56175	1.3631	1.41094	1.81228	1.81047	1.82088	0.239649	0.470983	0.749171	0.916204	1.57325	0.657009	0.573729	0.959182	0.563802	1.07533	0.844727	0.956719	2.04019	1.89034	1.59263	1.92979	1.71749	0.839529	0.538154
Cp409	Positive	296.235	10.24	3.0681	1.21395	1.18944	0.202076	1.66215	5.12995	1.75816	1.29036	1.02696	0.72102	0.379473	1.15262	0.841365	1.76574	1.3009	0.540905	1.43651	0.755726	0.402583	0.133588	2.29361	1.05038	0.570538	1.22952	0.354588	1.20912	1.37553	NA	6.26786	0.0842648	0.910726	0.884365	0.353986	0.448821	0.702558	0.94603	1.26518	0.623739	0.200697	0.970947	1.1917	1.03126	1.00979	2.08449	NA	4.78451
Cp1132	Positive	297.038	6.04	1.08116	0.926119	0.5543	NA	NA	NA	1.72599	NA	0.387988	0.584278	0.301108	NA	0.256079	0.791236	0.297387	NA	0.689161	NA	1.09542	1.01417	NA	2.15394	0.673156	NA	0.80818	NA	0.884772	NA	NA	0.501931	NA	NA	0.678025	0.24671	0.972442	0.214261	0.866619	0.887658	NA	0.81834	NA	0.911848	0.599573	0.927718	0.367898	0.132122
Cp879	Positive	297.137	2.9	0.268222	0.473908	0.438117	0.617401	NA	0.446877	0.890574	0.232455	0.784642	1.05279	0.220122	2.16115	0.126681	0.700251	0.470191	0.643822	0.524144	0.314282	1.7103	0.562412	0.46501	4.28715	0.56276	0.336247	0.745652	0.654718	0.93611	NA	0.195592	0.409944	0.388261	0.900961	0.340983	0.690733	0.236543	0.326861	0.964048	0.212031	0.153667	0.620614	0.601318	0.758215	0.500295	0.770414	0.280235	NA
Cp1671	Positive	297.303	13.35	0.14998	0.385196	0.677923	0.187145	0.358834	0.62235	0.791894	0.424212	0.44355	1.18633	0.415037	0.333009	0.428294	0.633345	0.520693	0.598141	0.544618	0.240533	0.595284	0.228381	0.272826	0.695132	0.163479	0.604854	0.397056	0.213635	0.25482	0.493871	0.328834	0.207275	0.551826	0.658819	0.378155	0.431602	0.603293	0.484422	0.327325	0.604281	0.53266	0.260239	0.587805	0.442497	0.674729	0.499936	0.321388	0.383524
Cp119	Positive	297.338	9.8	0.971476	1.28907	0.296037	0.468194	0.28266	NA	0.291519	0.443156	0.305	0.301986	0.470691	NA	NA	0.796731	1.38593	0.365346	1.09662	23.3914	0.761287	0.438462	0.594849	0.266275	0.636175	0.415096	0.845567	3.61905	NA	1.40477	0.985404	1.00481	2.40877	1.95415	0.511211	1.03469	0.752317	0.512305	NA	0.290944	NA	0.280889	3.58587	0.510929	1.17753	0.472049	0.381485	2.2298
Cp1549	Positive	297.943	5.12	0.0425141	0.393848	0.373874	NA	0.289293	0.453864	1.07101	0.414435	0.5003	0.303908	0.67534	0.140125	NA	0.921008	1.02572	0.451681	0.435786	0.15942	0.47316	0.30097	0.493201	0.345904	0.249858	1.31866	0.706702	0.680199	0.199581	0.274389	0.0909022	0.493938	0.569793	0.276832	0.461693	0.348048	0.474855	0.242811	0.111398	0.650919	NA	0.255006	0.669846	1.3324	0.630667	0.433468	0.411142	NA
Cp1733	Positive	297.945	4.23	0.195151	0.473496	0.291458	0.165687	0.148177	NA	0.575159	0.253965	0.320434	0.548411	0.421027	0.287199	0.343206	0.48014	0.421057	0.293133	0.21289	0.147031	0.244958	0.151278	0.581296	0.462577	0.570402	0.824066	0.468052	0.339831	0.432399	0.192102	0.208038	0.193728	0.410939	0.425246	0.208451	0.414242	0.366497	0.241344	0.262139	0.491084	NA	0.37664	0.559492	0.667834	0.460974	0.435092	0.217525	0.17434
Cp1087	Positive	298.054	8.46	0.230285	0.380802	0.279726	NA	0.00588428	NA	1.57358	0.0766295	1.49152	1.39481	1.38262	0.553124	0.595888	1.10056	0.977346	0.753266	0.181642	0.0599578	0.00951432	0.0064659	1.29785	0.713813	0.600286	2.47376	1.01153	0.185338	1.1967	0.187244	0.505026	0.157014	0.788573	1.04312	0.0738183	0.375852	0.5404	0.0509637	0.586438	0.988964	0.172794	0.904332	0.905354	2.70487	0.695923	0.596999	0.0779955	0.322104
Cp1582	Positive	298.062	4.11	0.337603	0.795798	0.24653	0.192675	0.367714	0.894023	0.843946	0.747107	0.290278	0.36091	0.218749	0.385485	0.138914	0.532824	NA	0.176629	0.572172	0.188289	0.952426	1.29574	0.725502	1.01666	0.274557	0.661156	0.591415	0.48896	0.255913	NA	NA	0.37865	0.256576	0.545093	0.282795	NA	0.457932	0.264557	0.231292	0.436108	0.413316	0.468431	0.831517	0.608262	0.8203	1.16151	NA	NA
Cp1587	Positive	298.114	6.8	0.481679	0.899478	0.573902	0.620497	0.274636	0.374324	0.366304	0.895478	0.864424	1.2483	1.17012	0.801746	0.536081	0.729179	0.522367	0.469119	0.308945	0.68373	0.804883	0.603891	0.527897	0.47825	NA	NA	0.606396	NA	0.564569	NA	NA	0.403848	0.902181	0.696636	0.526711	0.410855	0.447576	0.738306	NA	0.79531	0.484713	0.610431	0.887177	NA	NA	0.589148	0.539305	0.243644
Cp685	Positive	298.142	9.42	1.59812	1.86528	1.22235	0.729886	1.11416	0.919686	1.15768	0.652512	1.03729	0.997547	0.608954	1.71298	0.999036	1.61172	0.632955	0.929359	0.691624	0.968208	1.19312	0.660376	0.907386	1.86519	NA	0.960129	1.02104	0.707154	1.99175	NA	1.2802	0.381765	1.01283	0.77064	0.859287	1.33108	1.0837	0.337934	1.23597	0.518727	1.00349	1.44843	1.24671	1.08934	1.38125	0.748483	0.419503	3.3159
Cp344	Positive	298.25	10.37	10.2494	3.53955	0.538704	2.11666	0.24714	NA	0.648653	0.538851	0.470619	1.73602	0.188676	3.14841	1.90238	0.538965	0.3091	0.114472	0.472577	1.12412	0.0972732	0.6838	2.77258	2.48592	2.30753	0.582438	0.892464	NA	4.45585	0.0939165	3.241	0.214591	0.368979	0.893887	0.667123	3.33807	0.291606	0.537386	3.16558	0.400126	1.80693	2.73435	0.662286	0.575818	0.76341	1.01639	1.19541	5.30422
Cp684	Positive	298.251	10.49	5.42409	1.26723	0.609816	1.33379	0.719808	0.977057	NA	0.958663	NA	0.73399	0.286258	1.86559	2.9861	NA	NA	0.442374	0.292012	0.720312	0.105652	NA	1.94095	2.36687	1.60558	NA	0.504005	0.882032	2.50092	NA	2.2329	NA	0.231269	0.859607	NA	0.555522	0.306509	NA	2.04683	NA	2.89727	1.05666	0.551932	0.172854	0.0211942	0.265333	NA	4.32418
Cp1514	Positive	298.251	11.55	NA	NA	0.270711	NA	NA	NA	1.27677	NA	0.732879	2.34608	NA	3.6092	1.59683	NA	NA	1.05432	NA	NA	NA	0.0619751	1.44369	2.63077	2.33223	1.17765	NA	NA	2.09927	0.117764	1.80206	NA	2.48426	NA	0.0358584	NA	NA	NA	0.575612	1.70629	1.55567	2.27455	2.67955	2.00882	2.73782	NA	NA	0.37246
Cp931	Positive	299.191	3.94	2.90395	1.34647	1.2823	0.741942	0.682791	0.777265	0.702772	1.04287	0.641937	0.788271	0.766558	1.37033	0.68016	1.1067	1.55995	0.877794	0.668996	0.489247	1.12241	0.980621	1.64861	1.15628	0.585276	0.944881	0.62776	0.974969	1.58525	0.448091	1.28984	0.832081	0.793284	1.1227	0.817649	1.37822	1.04253	1.02581	1.84906	1.27064	1.21021	1.59863	1.10869	1.21448	1.00603	1.28037	0.913213	2.212
Cp315	Positive	299.191	4.17	9.37406	2.47679	1.98069	1.16943	0.886173	0.84337	0.619333	1.52269	0.599197	0.482121	0.779162	2.99977	1.56026	1.04626	1.85718	0.871375	0.678078	0.801074	1.15407	0.982939	1.56282	1.80788	1.20221	0.803214	0.668533	1.13201	4.45834	0.545393	3.92148	0.694168	0.831628	1.99985	1.37693	2.53302	1.07145	1.71008	3.13985	1.08178	2.03003	2.81115	1.49541	1.09452	1.11088	1.1787	1.1958	10.0267
Cp614	Positive	300.033	6.7	1.33255	1.9621	1.32422	0.48589	0.538572	0.771488	3.60996	0.951575	2.09487	2.99008	2.24814	1.72589	1.61545	2.62485	3.57792	1.49519	1.12895	0.689106	0.771938	0.637441	3.66194	2.26349	2.4792	4.49255	2.05823	1.55418	3.10887	0.953297	1.3811	1.14259	2.17641	2.24104	1.14707	2.04679	1.64658	0.965241	1.70856	2.05638	0.848379	2.49193	2.64303	4.96752	2.40917	2.14541	0.878592	1.56868
Cp1036	Positive	300.034	7.71	NA	0.395358	0.243526	NA	0.0121965	0.312518	1.3491	0.238566	0.889594	0.116087	0.876869	NA	0.0380585	0.804488	1.73154	0.382784	0.362052	0.000116877	NA	NA	0.401039	0.180313	NA	2.2625	0.416075	0.43022	NA	0.179884	NA	0.473075	0.445777	0.170452	0.306701	0.182351	0.282766	NA	NA	0.584669	NA	0.131534	0.316424	2.18645	0.457907	0.271831	NA	NA
Cp1321	Positive	300.122	4.64	0.672106	0.704889	0.259694	0.403489	0.569813	0.578683	1.36318	0.628191	0.334325	0.568906	NA	NA	0.252002	0.717058	0.509741	0.230548	1.08508	NA	0.615874	0.635977	NA	1.92994	0.274011	0.744305	0.803751	0.770722	0.567846	NA	0.481721	0.384475	0.475247	0.709424	0.416771	0.322078	0.268621	0.227869	0.644872	0.635167	0.410434	0.609724	0.862242	0.817378	0.689928	0.496552	0.269522	NA
Cp1521	Positive	300.123	4.9	0.685097	0.672892	NA	0.223423	0.309085	0.459104	0.609517	0.846713	0.076814	0.568746	NA	NA	NA	0.639971	0.54488	0.34855	0.602804	NA	0.202215	0.363677	0.357533	1.46989	0.536287	0.438816	0.533967	0.393609	0.0680354	NA	0.0212308	0.27867	0.268627	0.482789	NA	NA	0.129322	0.0485622	NA	0.287547	0.247466	0.44764	0.492733	0.386196	0.410499	0.475298	0.20446	0.209437
Cp8	Positive	300.157	10.58	122.431	74.0828	17.02	18.9342	15.0591	7.90339	68.0915	37.8616	30.2267	81.0774	25.9896	48.7127	21.889	32.7143	34.7751	31.7532	44.7365	25.3016	49.7249	53.4008	141.39	274.302	55.3348	56.7734	95.1748	22.5954	146.942	17.4451	20.973	19.4879	30.2082	135.726	21.8366	11.1708	68.3549	25.4618	134.341	62.1324	77.8591	187.361	141.286	72.5501	154.875	150.033	26.9611	26.6991
Cp99	Positive	300.157	10.58	117.349	71.2205	16.4871	18.5285	14.5629	7.76634	65.7234	36.3325	29.2683	78.017	25.3642	47.4077	21.6823	31.3028	33.6762	30.9098	43.0888	24.6846	48.359	51.5436	135.068	261.409	53.3298	54.3394	91.2845	21.3953	140.277	17.0675	20.4369	19.2324	29.3915	129.421	20.4667	10.9416	65.8322	24.3768	128.54	60.0887	74.8023	178.184	135.763	69.6329	147.313	142.653	26.319	26.1305
Cp43	Positive	300.157	10.58	118.198	71.5957	17.1437	19.0156	14.9624	7.91373	65.5007	36.7734	29.7726	78.8227	25.7735	48.6125	21.5485	31.8135	34.4634	31.1756	44.2219	25.4828	48.4906	51.7736	135.329	261.386	53.8155	55.3471	91.8173	21.5161	141.604	17.5577	21.0982	19.4179	29.5088	130.053	20.9961	11.7203	66.2762	25.084	129.459	60.5347	75.1977	179.296	135.751	69.8309	148.049	142.89	27.0666	26.4456
Cp183	Positive	300.157	10.04	10.5785	4.47528	0.865074	1.24509	0.70697	0.417318	2.7921	1.71433	1.45139	5.81748	1.52725	4.02036	1.90483	1.6636	1.64407	1.74254	1.72544	1.83801	1.77066	1.69126	10.3046	18.9679	4.16571	2.76661	5.11053	1.16259	12.2212	1.06664	1.61464	0.852537	1.65394	10.3817	0.892256	0.865886	3.63529	1.5105	11.1662	3.37196	5.92791	14.8991	8.26916	3.31382	7.91311	8.65852	1.27314	2.00968
Cp1475	Positive	300.219	8.61	0.160313	NA	0.302046	NA	0.114155	NA	0.615975	0.138715	0.394874	1.27664	0.412417	1.71795	0.36142	0.808044	NA	0.474148	NA	NA	NA	NA	0.968782	1.26109	1.04064	0.411316	0.449944	0.205052	0.550056	NA	0.410585	NA	0.625884	0.686298	NA	0.199711	0.807632	0.226401	0.41486	0.806892	0.232662	0.627403	0.445599	0.938703	1.31795	0.412214	0.214912	0.336346
Cp675	Positive	300.267	11.72	2.18062	1.73263	1.4932	0.615963	0.960743	0.763292	2.43497	0.870668	1.25336	4.78262	0.697926	4.4803	1.99658	0.531693	1.71663	1.29845	0.77952	0.95839	0.483952	0.760171	2.21784	2.39283	1.68596	2.01918	2.05719	0.0962899	3.34356	0.45074	1.27373	0.36876	2.4389	2.30117	0.676711	1.47095	2.25771	3.42724	2.18314	0.949739	1.74615	2.06706	3.36773	2.08161	2.37529	2.525	0.711235	1.98171
Cp1806	Positive	300.276	8.26	NA	NA	0.19173	NA	0.106345	NA	NA	NA	NA	NA	NA	0.059709	NA	NA	NA	NA	0.211967	NA	NA	NA	3.49388	NA	0.113398	NA	NA	0.0897186	0.181792	NA	NA	NA	0.53846	0.23126	0.0795977	NA	NA	0.0673734	NA	0.0481819	NA	0.0465319	0.398144	0.131686	0.344267	0.0921897	0.253453	NA
Cp263	Positive	301.116	3.94	3.59259	5.10327	4.46631	4.15269	3.18147	4.32057	7.31497	4.57259	1.49057	5.03962	1.93555	4.68155	6.5303	9.9412	11.3758	3.19932	7.71069	5.25221	6.56062	7.43921	11.2798	14.3296	5.9087	8.6452	8.77339	10.691	8.42905	2.4748	2.03365	5.28985	6.06932	7.30332	5.03711	3.70193	6.51296	3.26808	9.91613	7.17508	5.70664	9.44471	8.32772	9.15965	8.22252	14.0752	4.88406	5.28616
Cp359	Positive	301.188	1.61	10.3597	7.23963	7.42196	4.16906	4.26653	4.34059	6.52179	5.45182	4.27855	4.85516	5.86705	4.10758	4.14906	7.55149	10.9519	3.5591	4.65203	4.85635	5.22166	4.05766	8.01359	8.18439	5.16677	9.03554	6.00404	7.20243	8.93417	1.54064	4.41882	4.12626	6.467	5.06854	4.03242	8.64545	6.26215	6.50494	6.72075	5.03006	3.56801	4.97298	5.75289	7.2633	5.79913	5.46816	4.9712	9.27489
Cp12	Positive	301.189	2.32	142.233	97.7595	97.9977	57.9102	61.5636	62.173	155.57	66.0308	87.3969	132.334	104.74	106.443	100.546	151.583	137.959	79.4773	59.8085	63.7745	71.8758	62.7412	152.227	179.89	107.348	157.332	116.455	85.8967	201.561	33.652	97.6249	61.1364	144.41	128.943	54.5315	129.112	130.602	89.793	124.794	117.37	82.9125	115.481	123.952	146.862	150.012	130.594	74.585	134.906
Cp1543	Positive	301.238	11.35	0.0862091	NA	NA	NA	NA	NA	NA	NA	0.161108	0.102957	0.254188	0.258975	NA	NA	NA	NA	0.213814	NA	NA	NA	NA	NA	NA	NA	NA	NA	NA	NA	NA	NA	NA	0.31669	NA	0.0971034	NA	NA	NA	NA	NA	NA	NA	NA	NA	NA	NA	NA
Cp954	Positive	301.297	9.11	0.156328	0.857319	0.469309	0.446072	1.06719	1.06748	1.53561	1.14223	0.813967	2.09949	2.46626	0.139274	0.974026	1.44543	3.7486	0.993121	1.1936	0.644693	0.853732	0.777494	0.480867	1.04816	0.526598	0.720716	0.646909	1.50577	0.407432	0.406873	0.28686	1.27061	0.544595	0.511765	1.03109	0.568224	0.76924	1.21726	0.293568	1.54074	1.04449	0.16958	1.37911	0.898352	0.784047	0.866529	0.610115	0.252291
Cp429	Positive	302.006	2.06	NA	NA	0.314065	NA	4.86962	6.02787	1.01147	0.878734	1.72742	NA	7.01757	NA	NA	3.12988	6.3977	0.531704	5.35736	NA	2.48835	3.72314	0.08281	NA	NA	2.30355	0.304305	10.8012	NA	0.335626	0.0329444	3.48317	0.684167	NA	4.3034	NA	0.989491	0.642783	NA	1.85809	NA	NA	0.544049	1.04994	0.6573	0.49398	1.01263	NA
Cp749	Positive	302.006	5.19	0.0788282	0.302801	0.742882	0.12974	1.47171	2.00127	0.845108	0.973574	1.54269	0.616302	3.32392	NA	0.093923	2.20968	4.44072	0.750163	1.9251	0.118513	0.836976	1.06822	0.0643776	0.220999	0.169074	1.49617	0.750211	2.16639	NA	0.638279	NA	2.14076	0.812346	0.396543	1.24296	0.464911	1.04948	1.09759	0.14562	1.24161	0.0444102	NA	0.983535	0.701778	0.738591	0.326793	0.780869	0.333167
Cp550	Positive	302.03	7.3	0.796844	1.93381	1.09515	0.371414	0.517817	1.16691	4.45196	0.927987	2.59363	2.2737	2.83563	1.24878	1.10139	2.67236	5.14304	1.63459	1.26734	0.512739	1.18815	0.605965	3.10395	1.76894	1.79458	5.70838	2.10213	1.88892	1.81589	0.632685	0.847404	1.28768	2.0788	1.80546	1.12251	1.91977	1.73057	0.860912	1.31163	2.14487	0.603533	1.66893	2.58914	6.23544	2.55042	1.89835	1.01825	0.829866
Cp278	Positive	302.044	7.05	3.08508	10.1482	1.86579	NA	1.24597	0.435322	3.61008	0.509641	2.08098	4.5061	0.609703	NA	0.314119	0.865092	NA	0.137473	0.360205	NA	1.52286	1.74262	1.04183	3.04111	0.537788	0.704555	2.03087	0.3633	1.23228	NA	NA	0.559643	NA	0.636781	0.836169	1.69112	1.76707	0.587416	1.52255	1.31913	0.294627	2.5	1.34162	3.19126	1.96367	3.87671	0.460395	NA
Cp787	Positive	302.136	7.76	1.24546	0.740868	NA	0.103416	0.781219	0.171576	1.80375	0.694188	0.240533	0.545048	0.313711	NA	0.216254	0.17179	0.742631	0.270345	2.39536	0.484805	0.460521	1.64893	0.552564	3.03414	0.854374	0.526136	0.305478	0.635675	1.08763	0.0772824	0.157279	0.278941	0.469112	0.753091	0.212917	NA	0.651031	0.207323	0.262954	0.50591	0.408338	1.19371	1.2776	1.47758	2.5348	0.687429	0.166051	0.500895
Cp1826	Positive	302.136	8.07	0.791382	0.463746	NA	NA	0.139511	NA	NA	0.0845736	0.228542	0.496052	0.584122	0.391583	0.0473013	NA	0.569066	0.573107	1.18544	0.223118	NA	0.329883	0.517596	1.17876	0.463554	0.177247	0.554549	0.185606	0.945629	0.351083	0.159597	0.240331	0.427591	0.593114	0.417559	0.142268	NA	1.04169	0.560014	0.444601	0.232531	0.725983	0.895702	0.713911	0.837172	0.436717	0.239212	0.411372
Cp905	Positive	302.136	7.93	1.03259	1.35141	0.418515	0.826556	0.800583	0.764367	1.01457	1.92503	0.781556	1.48351	1.81825	0.695659	0.919521	0.869617	0.741262	0.624244	2.36719	0.518933	1.73856	0.655984	0.773481	3.61244	2.33987	1.69049	1.52713	2.67506	2.12564	0.134545	0.946847	0.912552	0.420799	1.60753	0.767737	1.28747	1.02536	1.20685	1.74558	1.15822	1.20471	1.1848	1.55429	1.16213	0.926968	1.41425	0.751213	0.35008
Cp539	Positive	302.136	7.24	1.90442	1.59887	0.581486	0.77435	1.32279	2.19865	3.58257	2.21871	1.02102	2.08124	1.57442	1.59271	0.562043	2.28208	2.45378	0.840777	4.04738	0.808437	2.39647	3.25638	1.92442	7.89405	2.23385	2.73624	3.65557	2.76062	2.1375	0.653588	1.22248	1.50606	1.08295	1.45082	0.620625	0.948875	1.41585	0.862647	2.01063	1.77501	1.58999	2.88116	3.86529	3.25193	3.71387	2.48506	0.98546	0.662392
Cp532	Positive	302.137	6.09	1.90841	2.19102	0.635285	0.627797	2.2861	3.30966	5.88928	2.9635	1.2422	2.3014	1.15901	1.36012	0.909735	1.5794	1.52785	1.00264	4.0834	0.931392	1.59315	3.6436	3.82742	6.99803	3.02122	4.20804	3.75744	2.14775	2.68552	0.510653	1.07435	1.28836	1.63576	4.0061	0.994971	1.0488	1.34677	1.05436	1.47901	2.55194	1.53811	3.70247	3.33459	3.45095	3.77996	2.69218	1.47708	1.13175
Cp448	Positive	302.137	6.96	1.77718	0.859242	0.295608	0.863277	1.225	2.62967	4.28354	1.56522	2.08336	2.07403	2.67303	1.23956	0.677578	1.95676	1.45986	1.30284	5.36613	1.0187	3.33626	3.48732	3.15071	8.83345	3.53622	2.8018	3.71536	3.85227	2.9806	0.628563	1.04312	1.23308	2.02172	2.47829	1.45706	1.4399	2.58468	1.30531	2.60207	2.99701	0.879165	3.30136	4.53964	3.54761	3.93348	2.10385	0.761664	0.924348
Cp210	Positive	302.137	7.06	6.33814	5.39302	0.948777	2.4904	3.53207	6.44868	9.70254	5.83619	3.24506	6.85922	3.86549	3.80478	2.01846	5.63901	6.72825	3.56755	11.3223	1.94764	7.14582	7.57096	8.27246	20.168	6.31767	4.61988	9.19585	11.6894	6.44089	1.30408	4.39369	4.74172	4.94419	11.691	4.27857	4.05887	3.3668	3.27261	5.68465	4.4718	5.00591	7.68682	10.4307	9.17792	10.9153	6.51054	2.6879	2.34806
Cp1044	Positive	302.171	10.78	2.39112	1.73606	1.61525	1.00961	0.922549	NA	2.49283	1.14639	1.55741	NA	1.18783	1.74149	1.32865	2.25202	NA	1.02094	0.977017	NA	1.43056	1.11616	2.45448	3.00976	1.68364	1.45733	1.9789	NA	2.58924	0.423213	1.07435	NA	1.75276	1.90735	0.861914	1.91356	1.94855	1.57841	1.25634	1.99754	1.64567	1.77444	1.82567	2.02831	2.33429	2.12131	1.07469	1.86535
Cp1820	Positive	302.174	10.21	2.65846	0.945619	NA	0.22287	0.0564891	0.123207	NA	0.203368	NA	NA	0.153237	1.23602	1.25552	NA	0.28035	NA	0.219356	0.303412	0.12397	0.130294	2.44486	1.86076	0.74698	0.343155	0.621507	NA	3.19376	0.104368	0.651201	NA	0.187886	1.65759	NA	NA	NA	NA	2.05824	0.359202	0.895147	1.26315	1.46018	0.591086	1.15676	0.807777	0.0698954	0.292856
Cp1648	Positive	303.042	3.68	0.116471	NA	0.312491	NA	0.326524	0.345436	0.888249	NA	0.763272	1.65836	NA	0.115021	NA	0.81871	1.4842	0.556738	1.13803	0.20208	0.118006	0.40723	0.584685	0.943993	0.815483	0.741178	0.18967	1.14193	NA	NA	NA	0.296959	0.285389	0.186504	NA	0.316009	0.693591	0.381961	NA	0.645359	0.525717	NA	0.829747	0.944156	0.362951	0.347505	0.621481	NA
Cp497	Positive	303.292	9.14	3.55672	1.62318	1.41637	0.89856	1.83868	1.29965	0.512516	4.76069	0.211209	0.769216	0.476057	0.914923	1.16853	0.920039	2.76836	0.443978	6.56804	1.11103	1.17197	1.07785	1.5246	3.35931	1.12074	3.76792	0.689246	1.26625	0.545375	0.420563	1.17355	1.16724	0.809169	0.945989	2.40868	0.799409	1.19219	1.64138	0.915625	1.43712	1.38327	1.22355	1.10177	2.24711	2.87293	1.2778	2.36991	2.40681
Cp1511	Positive	304.051	8.01	1.11732	0.60423	0.346831	0.461778	0.347387	0.355245	0.99907	0.489598	0.999769	1.29553	0.82371	1.25914	0.476275	1.27962	0.871777	0.663828	0.459338	0.178003	0.634761	0.516662	1.42702	1.25554	1.25625	0.663111	1.00319	0.59504	1.70993	0.635629	1.24811	0.0899547	1.32068	1.22677	0.39523	0.958614	0.537495	0.888262	0.585041	0.909896	1.29536	0.890896	1.77484	1.12328	0.802313	0.565728	0.606196	1.02888
Cp1469	Positive	304.113	4.41	0.371851	0.214502	0.479611	0.538428	0.283729	0.412213	0.499212	0.449144	0.214889	0.983777	0.326564	0.359247	0.222914	1.18847	0.762558	0.414023	1.2033	0.542192	1.29224	0.781032	0.720488	1.1213	0.815892	0.667803	1.38097	1.22884	1.47056	0.366981	0.465492	0.592021	0.51151	0.883685	0.599609	0.615506	0.396933	0.530849	0.665824	0.272258	0.484582	0.966846	0.916937	0.578953	0.643217	0.653992	0.38031	0.37157
Cp1341	Positive	304.151	6.36	0.829615	0.886158	0.229933	0.263131	0.476948	0.700547	1.2127	0.529196	0.36175	0.727265	0.312588	0.518518	0.365498	0.760046	0.63402	0.391236	1.23455	0.449392	0.693977	0.923526	1.33323	1.69659	0.919329	1.20358	0.984954	1.33746	0.886332	0.197548	0.537726	0.502202	0.549744	1.0306	0.357795	0.543948	0.455785	0.826225	0.557802	0.739406	0.443971	0.434769	1.02842	1.97842	1.27737	1.22405	0.428779	0.22724
Cp930	Positive	304.152	8.76	3.01776	1.50522	0.354987	0.167899	1.18285	0.723388	1.60226	0.598737	0.949549	1.82553	1.06342	0.698354	0.53146	0.769258	0.77564	0.776053	2.04901	0.230715	1.59514	2.19475	2.57849	3.80969	2.37494	1.1276	1.38227	1.1874	2.13937	0.186803	1.11108	1.08474	0.346521	1.47979	0.794138	0.455031	1.17691	1.227	2.80694	1.54074	1.45571	3.1769	2.1133	1.12301	1.88629	1.76054	0.61926	1.25968
Cp876	Positive	304.152	7.27	NA	0.911288	0.155816	0.121556	0.418533	1.28098	2.53106	1.19222	0.425979	NA	0.373733	0.107363	NA	NA	0.812452	NA	2.09411	NA	3.22251	3.86771	1.43732	2.69758	NA	2.97553	1.17462	1.33344	NA	NA	0.0725997	0.558423	0.469222	0.472994	0.49742	NA	0.62994	0.0398904	NA	0.932752	NA	0.867983	0.605178	1.11606	2.24129	0.96454	0.594699	0.03586
Cp780	Positive	304.164	10.45	3.70109	2.69995	2.74389	2.32946	2.72079	3.37146	2.67663	3.61858	1.44534	3.59902	1.36191	1.96288	1.89151	3.17529	2.72303	1.71258	2.83869	1.6427	1.52726	2.21024	2.35243	2.65214	1.60272	2.50791	2.22002	2.41047	2.7623	0.8741	1.7535	2.29425	1.92969	2.82205	2.198	2.97817	2.68975	1.97478	2.49195	2.94481	1.99414	2.457	2.26371	2.29973	2.30334	1.50062	1.7628	2.05266
Cp910	Positive	304.165	10.52	1.59177	2.73139	2.06754	1.51994	NA	2.35141	5.89044	3.28957	3.38361	3.85857	3.01482	2.14555	1.50535	1.95627	2.52771	1.67449	3.33775	1.47534	2.01704	2.23928	2.01007	2.80855	3.88583	2.08473	2.11398	2.17833	2.73405	0.831411	2.04756	1.89948	1.71113	2.27464	1.84861	1.61576	1.90043	1.91687	1.7628	4.67982	1.98916	1.76256	2.48409	2.44368	2.63896	2.16287	1.39294	1.86726
Cp1053	Positive	304.259	10.97	1.19217	0.77465	0.926743	0.439215	0.645131	0.630814	1.6742	0.774484	1.76162	2.36721	1.62047	1.37614	1.58337	1.55952	0.785984	1.25309	1.00334	0.521505	0.326043	0.920354	2.24685	2.61811	1.52344	1.17361	1.07744	1.13027	1.87987	0.853492	1.41893	0.623722	2.07124	1.58059	0.787308	NA	1.30206	NA	NA	1.65811	0.85768	1.51816	1.63553	1.74927	1.87457	1.3337	0.57876	0.716055
Cp1570	Positive	305.198	5.08	0.296418	0.249794	0.242667	0.0820694	NA	NA	0.83413	NA	0.771939	0.766334	0.653003	0.825998	0.486334	0.69217	0.681328	0.411884	0.249065	0.147615	0.199091	NA	1.02909	1.20615	0.350292	0.752255	0.392106	0.276666	1.01257	NA	0.366903	0.322292	0.773235	0.477348	NA	0.342261	0.491904	0.216796	0.549887	0.768285	0.403098	0.501668	1.59338	0.687874	0.491929	0.376746	0.152072	0.329606
Cp1700	Positive	306.003	3.56	0.720377	0.610135	0.350694	NA	0.422492	0.262	0.853375	0.583704	NA	1.08561	0.44511	0.280391	NA	0.7072	0.320356	NA	0.505364	0.261337	0.574409	0.840812	0.694194	0.956816	0.640132	0.494205	0.703054	0.538714	0.694554	NA	0.179364	0.312674	0.217794	0.527545	0.402848	0.393636	0.652547	0.429055	0.660121	0.700799	0.15013	1.22624	0.680625	0.783298	1.0717	1.03886	0.274617	0.326555
Cp851	Positive	306.004	6.42	0.374508	1.89096	2.60223	0.541304	0.791811	0.513251	1.42246	0.274986	0.282205	2.04874	0.430261	0.234439	1.02418	1.41246	1.6789	1.89103	0.924372	1.08473	0.628939	1.26768	1.99408	1.23211	1.15581	1.16123	2.14486	1.03009	2.26202	0.321495	0.114817	0.894534	0.392862	3.02012	1.20119	0.581915	0.637013	1.45006	4.02335	0.472707	3.50513	0.770676	5.21399	1.69992	3.3413	4.29921	0.459742	0.267424
Cp1525	Positive	306.004	7.46	NA	0.504532	0.318215	0.392539	0.435651	0.259716	0.384774	0.538484	0.394874	2.14241	0.53271	0.493273	0.898997	1.69673	0.71814	0.494046	1.49531	0.36711	0.771228	0.868139	1.46835	1.54826	0.657053	1.08186	0.947046	1.93733	1.26396	0.345931	0.410219	0.602994	0.15973	0.735678	0.365282	1.1284	NA	0.0687076	0.99117	0.742804	0.678467	0.952561	1.54882	0.583588	NA	0.548265	0.360974	0.438458
Cp1432	Positive	306.005	6.66	0.187328	0.545729	0.942625	0.292994	0.350061	0.386416	0.312573	NA	0.188651	0.605414	0.349275	NA	0.438624	1.02638	NA	0.636975	0.449333	0.38172	NA	0.7803	0.402665	NA	0.936386	0.204746	1.38019	0.372956	0.544127	NA	0.241958	NA	0.288019	1.15099	0.337174	0.314598	NA	0.390232	0.860566	0.648139	0.475412	0.323036	1.87473	NA	1.53351	0.947347	0.159126	0.15641
Cp1633	Positive	306.006	6.09	0.46116	1.0699	0.948348	0.56807	0.432013	0.888783	0.86642	0.315929	0.204085	1.0166	0.512245	0.541494	0.456702	0.994863	0.726963	0.697207	0.876037	0.653108	0.506247	0.982207	0.960243	0.934653	1.00803	0.839445	0.95877	0.724589	0.887268	NA	0.227194	0.410757	NA	1.02951	0.889235	0.390107	0.744739	0.725098	0.798756	0.673929	0.968116	1.14873	1.49187	0.657474	1.25339	1.39882	0.37025	0.631491
Cp1534	Positive	306.056	7.79	0.545154	0.382038	0.3816	0.221211	NA	NA	0.962129	0.320084	0.477505	0.498614	0.347778	0.513838	0.445692	0.733057	0.473842	0.322553	0.51537	0.211898	NA	0.301824	0.659769	1.27043	0.61516	0.443247	NA	NA	0.918789	0.24642	0.582262	0.431891	0.649548	NA	0.273469	0.334357	0.555681	0.227469	0.627528	0.365379	0.585455	0.742107	0.894255	0.741856	NA	0.645463	0.210209	0.476734
Cp436	Positive	306.074	2.09	0.227332	2.19967	1.54715	0.870024	5.43291	3.64247	5.52763	3.24631	3.30193	1.29569	3.77302	1.07008	2.06454	4.46347	4.13421	2.12307	3.24816	NA	2.57909	1.75763	1.03994	2.82153	0.254907	3.18966	3.60464	8.2285	1.19358	1.99624	0.595196	3.76428	1.08481	1.36688	2.31543	1.32981	1.04721	3.019	0.503908	4.20649	0.623446	1.19837	0.87286	1.42032	2.11998	1.23069	0.661198	NA
Cp280	Positive	306.094	5.15	0.553126	1.05122	0.915869	0.533119	0.391144	1.06036	1.24009	0.549606	1.79783	3.42513	0.520231	1.74801	0.429654	1.65019	2.07197	0.359034	1.74607	1.1032	0.891364	0.597425	1.57231	14.8853	0.865154	3.57256	1.05295	3.24006	1.71618	0.529642	0.718066	0.73752	0.88761	1.49027	1.05723	0.556933	0.79614	0.648786	2.4774	2.46824	3.65762	2.05151	4.9484	3.75318	3.64373	2.62192	0.835479	0.427649
Cp199	Positive	306.094	6.09	2.84785	6.851	5.30663	2.70187	1.97872	5.00957	6.3017	1.23768	1.18593	7.1018	2.81354	2.52749	1.93174	4.94571	4.4786	4.50408	4.99931	3.4467	2.71584	7.51765	7.39448	7.17058	6.38877	5.384	6.41112	3.82558	6.38222	0.836416	0.828857	2.04633	1.88028	8.04784	4.60537	1.8324	4.57856	4.73789	6.0824	4.10565	7.05742	8.75847	12.5862	4.63531	13.1686	20.5193	1.50321	2.69064
Cp231	Positive	306.168	6.09	3.63732	10.0707	8.07598	4.10988	3.63638	7.59651	9.10038	2.39678	1.66331	9.29352	3.96319	3.27548	3.27657	6.81763	7.07933	6.35788	7.34125	4.88709	3.83555	9.65799	9.85412	9.10923	8.11417	7.66943	8.77287	5.48692	9.23876	1.26522	1.0818	2.94276	2.94701	10.0423	6.65481	3.3042	6.63471	7.09769	8.35318	5.37058	9.69387	10.6195	15.9468	6.42833	15.772	23.0731	2.50291	4.13979
Cp334	Positive	306.168	7.07	1.20707	1.97501	2.07412	1.03228	1.22768	2.25575	2.33215	0.848058	0.915	5.42679	1.7873	5.10576	2.79037	3.41592	5.96721	6.32867	5.36705	2.89457	1.71243	3.73863	5.65073	6.79745	3.72276	3.80793	2.78812	1.59495	2.80053	0.593087	0.571037	1.43237	1.4815	4.09752	2.54489	1.14322	2.42454	2.2464	4.54344	2.05035	5.23097	3.78634	9.01606	2.13601	5.36409	9.73177	1.5019	2.76974
Cp1074	Positive	306.168	6.66	0.326384	0.297446	1.36028	0.767492	0.564356	0.700547	0.598279	0.164014	0.313786	1.38856	0.388707	0.268761	0.832666	1.43929	0.49818	0.907642	1.22177	0.304464	0.463929	1.25902	0.706934	0.300311	1.7329	0.874373	2.32554	1.10036	1.42843	0.232878	0.260871	0.217029	0.398997	2.29437	0.628506	0.794752	0.380768	0.282168	1.4548	0.582043	1.5461	0.427698	2.26998	0.517064	2.65374	1.64615	0.327137	0.392806
Cp1683	Positive	306.169	9.07	0.406246	0.481873	0.394477	0.3087	0.240721	0.270464	0.706905	0.314707	0.522501	NA	0.529466	0.735938	NA	0.624941	0.661857	0.427717	0.32049	0.326788	0.239988	0.217401	0.5199	NA	0.596602	0.914645	0.576434	0.50103	NA	NA	0.497339	0.246292	0.509319	0.535979	0.208845	0.562861	NA	0.366218	0.57957	0.618488	0.36812	0.555837	0.782292	NA	0.64489	0.454044	0.389716	NA
Cp1556	Positive	306.982	5.73	0.84541	1.0964	0.67592	NA	0.27271	0.414497	1.2499	0.526141	1.03159	1.30386	1.22552	1.16156	0.959211	1.14338	NA	0.727269	0.507058	0.33006	0.554954	NA	1.37728	NA	0.980054	1.6639	0.946394	0.725393	1.53641	0.46075	0.888645	0.617355	0.979636	1.11685	0.459066	1.02142	0.937207	0.550461	0.956133	1.08239	0.587682	1.20021	1.41562	1.61935	1.16568	0.714233	0.644475	1.02175
Cp508	Positive	307.112	4.35	2.97348	2.22782	NA	2.12706	3.34976	1.24174	2.71835	2.41572	2.73111	6.77468	2.07019	2.61514	NA	4.49903	7.01255	4.14045	5.12984	2.02863	5.28712	3.46048	5.83356	16.1617	2.86947	7.2013	8.30339	5.50154	7.69845	0.642401	2.13211	2.38651	2.10673	7.21109	5.0999	0.741401	NA	2.95362	7.22128	2.57788	3.30325	3.84108	9.30884	5.65894	6.74924	10.5867	1.91304	1.9887
Cp483	Positive	307.126	1.5	5.5565	1.84057	2.31807	2.27903	3.45867	6.23935	7.09088	2.88907	1.20492	1.04238	0.743722	1.45613	0.898317	1.82666	1.93324	0.937276	3.09007	0.73013	1.61601	1.28549	1.79783	4.29443	0.835952	1.74523	1.1457	3.38208	3.00261	NA	1.54119	1.03001	1.62798	1.65895	1.67983	1.90114	1.10391	NA	1.48961	0.868664	0.645585	0.954824	2.16992	2.06935	1.69149	1.02248	0.702612	0.576938
Cp975	Positive	308.074	7.65	1.1746	3.77149	0.633281	0.249637	1.42582	1.19297	3.4166	0.72352	0.273301	0.943587	0.274029	0.467744	NA	0.454121	0.541077	NA	0.659606	NA	0.746519	1.51632	0.693517	2.22218	0.79365	0.721237	1.48271	0.905367	0.740431	NA	NA	NA	NA	1.17766	0.424915	NA	1.07411	0.305515	0.992916	NA	0.886239	1.67699	1.37653	1.48071	2.6384	2.28038	NA	NA
Cp1869	Positive	308.081	7.3	NA	NA	NA	NA	NA	NA	NA	NA	NA	NA	NA	NA	5.29992	8.15381	9.45188	3.05949	NA	NA	NA	NA	NA	NA	NA	NA	NA	NA	NA	NA	NA	NA	NA	NA	NA	NA	NA	NA	NA	NA	NA	NA	NA	NA	NA	NA	NA	NA
Cp1368	Positive	308.11	5.74	0.315756	0.274513	0.302905	0.576919	0.507653	0.457895	0.40389	0.345261	0.31248	0.326164	0.293745	0.860604	0.0933793	0.658232	1.67176	0.403111	0.494281	0.281089	0.211445	0.366361	0.550531	2.23357	0.310036	1.1349	0.791767	0.469514	0.291491	NA	0.315778	0.173271	0.264683	0.867497	0.789146	NA	0.86661	0.432924	0.57957	0.629607	0.225457	0.401815	1.604	1.23411	1.28378	0.89022	0.559817	0.272002
Cp309	Positive	308.111	4.35	3.56602	2.53131	1.74002	2.50433	3.94621	0.93554	2.2017	2.37503	3.13596	6.49623	2.18163	2.8683	0.636801	3.14943	7.76324	4.56966	3.02372	1.84069	3.8736	2.57746	5.59991	17.9842	2.61675	8.79704	4.89194	2.34958	5.80797	0.81463	2.24754	2.6985	2.09589	6.97439	5.86527	0.219894	5.72187	3.51182	7.83996	2.94296	3.83709	3.39513	10.4124	6.01364	7.3378	12.4864	2.14076	2.31208
Cp603	Positive	308.111	6.62	0.723034	1.25501	0.689227	1.05164	1.20992	0.352423	0.553202	0.474443	0.391193	1.87276	0.566527	0.262521	NA	0.757299	1.32432	4.29226	0.364515	0.667601	0.873755	0.24119	0.625615	2.39758	0.493711	1.35059	1.33042	0.573985	0.505428	0.29382	0.143857	0.364831	0.0971748	1.95075	1.21091	NA	2.55121	0.518175	1.29428	0.0654779	4.76041	1.165	4.4095	1.49912	1.91501	6.11999	0.397685	0.450157
Cp1856	Positive	308.111	4.96	NA	0.432573	NA	NA	NA	0.0408451	NA	NA	NA	0.061326	0.123413	0.840464	0.498295	0.101814	4.36619	0.692392	NA	0.329359	NA	0.068685	0.330562	1.45612	0.152289	1.64644	NA	NA	0.144185	NA	NA	0.488925	0.374895	0.537611	0.848648	NA	0.186911	NA	0.77664	0.445065	0.0434932	NA	0.874468	0.356615	0.90438	0.831603	0.933202	0.90451
Cp476	Positive	308.111	3.89	4.04415	2.83672	1.15925	1.00618	2.22287	0.867689	1.55408	1.36845	3.50827	3.3686	2.7635	1.6476	0.501965	0.990823	3.69383	2.83173	2.42523	0.850279	1.48111	1.80838	2.55044	8.87794	2.93197	4.01203	1.54367	1.42437	1.72257	0.328855	2.66435	2.34248	1.27324	3.67064	2.99647	NA	2.34156	1.05716	2.27672	1.52236	1.28449	1.53117	4.84014	4.99383	3.0793	3.94872	0.46745	0.928544
Cp1799	Positive	308.131	10.42	1.69008	2.04861	1.31764	0.451603	0.539856	1.07326	NA	0.816771	4.82753	2.7973	4.47319	1.84162	2.31967	2.4508	5.95717	NA	0.980712	0.725455	1.09741	0.428458	4.40858	2.16962	1.74136	6.71374	2.50505	1.09164	NA	0.766788	1.47335	1.44754	1.71245	2.1752	0.921415	2.89024	NA	0.982185	2.16405	2.73432	1.042	1.43881	2.84267	4.75418	3.04416	1.88725	1.03994	2.61091
Cp1755	Positive	309.193	10.82	NA	NA	NA	NA	NA	NA	NA	NA	NA	NA	NA	NA	NA	NA	NA	NA	NA	NA	NA	NA	NA	NA	NA	NA	NA	NA	NA	NA	NA	NA	NA	NA	NA	NA	NA	0.114868	NA	NA	NA	NA	NA	NA	NA	NA	NA	NA
Cp1324	Positive	309.303	13.23	NA	1.37998	1.13836	0.563867	NA	0.938899	1.25843	0.988729	0.551945	1.13045	NA	0.648573	NA	1.0532	1.40966	0.472008	1.90047	NA	NA	NA	NA	NA	NA	NA	1.10011	0.908586	NA	1.42833	NA	1.04545	NA	NA	0.611694	1.3888	0.789951	1.18817	0.746375	0.570152	0.861741	NA	1.20617	NA	NA	NA	1.77182	1.17906
Cp110	Positive	309.303	13.06	6.21429	13.5442	8.77136	3.12826	3.70614	10.6013	8.86595	8.0252	7.04528	18.3696	6.86096	8.65681	3.28051	13.3757	17.5262	4.93865	21.332	4.00818	10.8087	1.00795	2.8604	3.06137	1.53544	3.43298	9.80459	3.24275	1.57402	11.9515	2.40031	4.98016	1.50769	8.75251	3.4273	23.1312	13.1282	16.6846	10.7746	6.73697	9.405	3.50743	13.639	3.5686	3.64094	10.4951	10.5903	6.75172
Cp445	Positive	310.163	3.52	3.35094	0.262291	0.406926	0.658988	2.0427	1.0879	4.2515	0.760307	0.2771	1.29169	0.916675	0.00595672	0.2134	2.31004	0.735785	0.383319	0.693471	NA	0.705337	6.59522	0.626157	4.19343	6.11203	0.988801	5.21331	0.80787	7.38152	0.418797	0.34006	0.561268	0.685044	1.33777	0.101796	0.504288	4.10775	0.536186	0.0847413	0.494328	NA	0.24949	4.70678	1.14468	9.3493	0.744016	0.472153	0.609874
Cp1171	Positive	310.199	9.7	0.664873	0.82134	0.267993	NA	1.02889	0.710086	1.43719	0.13346	1.56228	1.6763	2.24639	0.995197	1.05531	1.05676	2.72501	1.58944	2.25251	1.19016	0.682049	0.943534	0.897763	2.45141	0.958356	1.74093	1.04462	3.11695	1.66078	0.310307	0.655472	1.11089	0.69085	0.834712	0.86152	1.76946	0.709756	0.772059	0.282859	1.62737	0.40205	0.985657	1.78835	0.838235	1.16038	0.385004	0.316946	2.03702
Cp887	Positive	310.208	9.71	0.991995	0.355534	NA	NA	0.935922	0.201269	0.948567	NA	1.22249	0.439369	1.70769	0.723174	0.305963	NA	1.79892	0.858858	1.21331	0.177068	0.508519	0.41211	0.260357	0.748482	0.728149	1.15758	0.527844	1.97287	1.20217	NA	0.175948	0.626567	NA	NA	0.0264012	0.108677	0.238311	0.393834	0.418468	0.0213112	0.373753	0.0250339	1.37669	0.0703414	NA	NA	NA	1.97281
Cp791	Positive	310.249	11.79	NA	2.53873	1.05251	2.31796	0.399489	NA	1.6866	0.622569	NA	NA	NA	1.42082	0.53214	0.233363	3.41987	NA	1.1896	2.16585	2.84805	0.66123	0.390061	2.69615	6.15051	NA	NA	3.7541	0.607169	NA	0.466103	2.80363	2.38664	NA	1.35566	NA	NA	3.56079	0.944376	NA	4.14521	0.763322	10.9664	2.40674	1.0915	1.11508	NA	7.66653
Cp1808	Positive	310.282	11.67	NA	NA	0.419374	NA	1.20649	1.60921	NA	0.59837	0.566785	1.89294	0.807363	1.4957	NA	2.31505	1.52709	1.1568	NA	0.133357	0.24013	NA	2.667	NA	NA	1.2187	0.55468	NA	1.98972	0.650644	2.25193	NA	NA	2.43966	0.195579	2.94641	NA	0.211859	NA	NA	NA	2.09054	NA	NA	NA	1.09829	0.481168	NA
Cp650	Positive	311.115	8.15	0.631806	1.07429	NA	0.548493	0.395852	0.914446	1.97864	0.502797	0.219638	2.17779	0.582999	NA	0.260293	1.55888	1.40555	0.955356	1.51317	0.310776	0.850324	1.43092	1.02896	1.19507	0.845914	1.08655	2.78343	1.57081	1.31046	0.26276	0.236712	0.451264	0.343563	1.2371	0.401666	0.420452	0.673006	1.08238	0.912598	0.568299	0.643751	1.02031	2.482	0.778663	2.12444	4.12769	0.280888	0.365466
Cp623	Positive	311.154	8.79	1.35543	1.117	2.1614	1.48001	1.68397	2.13953	2.45964	0.912832	0.751519	2.12159	NA	0.216144	1.82572	0.993409	5.54402	0.637296	0.931453	NA	NA	0.196295	0.596069	0.505954	0.453592	0.489644	NA	0.56044	0.227981	NA	0.365317	0.273657	0.178464	0.141885	NA	NA	0.479275	1.32772	NA	NA	NA	0.249632	NA	0.420685	0.265764	NA	NA	NA
Cp1256	Positive	311.316	13.24	0.629149	1.07333	0.503792	0.477595	0.603086	1.15844	0.685206	0.703721	0.333138	1.59223	0.721386	1.12057	0.441343	0.888686	1.01994	0.690681	2.46694	0.656965	0.629081	0.320123	0.742173	0.741992	0.352612	0.445853	1.0312	NA	0.351256	1.72906	0.394113	0.395313	0.376429	0.814171	0.475222	1.85244	1.44288	1.10199	1.14331	1.08919	0.551787	0.531794	0.99367	0.433363	0.665247	1.17275	0.591302	0.438204
Cp704	Positive	312.089	7.76	1.84818	2.01524	1.96237	1.02996	1.13995	1.30758	3.23655	1.55422	1.61096	2.79602	1.74201	1.8948	1.79867	3.15476	2.6202	1.7006	1.45991	1.13242	1.66827	1.46813	2.92139	3.76869	2.81803	3.10247	2.14004	2.33416	2.66243	0.834502	1.8915	1.23105	2.39979	2.62698	1.03845	2.34389	2.91935	1.82122	1.93194	2.36786	1.46947	2.27752	3.2799	2.83397	2.99605	2.63979	1.53247	1.22382
Cp1104	Positive	312.16	9.32	1.48858	0.414996	NA	0.770811	NA	NA	0.152024	0.65349	0.570584	2.46297	0.996039	1.6615	0.174118	0.106662	2.44709	0.172456	0.0584948	0.169705	0.339249	0.562046	0.40009	2.41674	NA	1.75279	0.558718	0.271436	0.143093	NA	1.06374	0.811624	0.117114	0.776897	NA	0.379663	0.23768	1.04516	0.286467	1.08595	0.513665	0.365749	0.889429	0.792977	2.40178	0.20983	0.544923	0.438839
Cp257	Positive	312.161	9.04	12.2585	10.8116	12.2251	9.22285	11.1389	12.892	13.1067	9.51709	6.90578	9.65892	4.6585	2.65939	10.5674	10.884	16.4442	5.87517	8.43618	2.34326	2.76355	5.29582	6.36878	6.01873	5.08995	5.92786	4.33817	9.17544	4.82427	2.85165	5.84544	4.9685	3.91668	5.51065	4.69718	5.27887	8.43208	8.56643	2.26601	2.48368	2.20138	6.9747	3.65053	5.40225	3.60539	1.31164	6.17954	7.16245
Cp402	Positive	312.228	9.83	NA	0.182093	0.153098	NA	0.387614	NA	NA	0.256898	0.294553	NA	NA	0.132041	0.289924	NA	NA	NA	NA	NA	NA	NA	NA	NA	NA	NA	NA	NA	NA	NA	NA	NA	0.118428	NA	NA	NA	NA	0.0632376	NA	NA	NA	NA	NA	NA	NA	NA	NA	NA
Cp480	Positive	313.062	4.24	2.88299	2.23345	0.866934	0.720927	1.3766	1.25021	4.59585	2.05653	1.04275	2.67705	NA	0.850392	NA	3.46053	1.74994	1.08834	2.65751	0.910237	2.99034	3.14109	2.32681	7.66165	1.59917	1.68567	3.64554	NA	2.98154	NA	0.432182	0.885051	0.655574	3.90598	1.79738	NA	1.76164	1.20445	4.00286	1.56437	0.999164	3.593	3.81414	3.58346	3.3353	6.88959	NA	2.16762
Cp384	Positive	313.083	8.07	2.45681	5.38918	0.811991	0.319208	1.24875	1.26472	3.68474	0.498642	0.675417	3.73448	0.953986	NA	0.405731	1.45658	0.972326	1.10941	0.968859	0.331813	1.2566	2.20744	2.01929	4.04114	1.65949	1.64123	4.71738	0.801567	2.09006	0.312221	0.328468	0.756622	0.342796	3.28539	1.25885	0.920224	1.70594	1.19605	1.81006	1.31543	2.32767	4.1924	4.48463	2.66098	5.9058	8.58122	0.422377	0.636705
Cp827	Positive	313.097	4.1	0.48655	0.545043	0.973817	0.432468	2.17825	3.53941	2.65377	2.25232	2.1597	0.768576	1.72891	2.50239	0.833618	2.24749	1.60665	0.566795	1.40973	0.145512	0.745809	1.15984	0.595392	0.660938	0.435033	1.92104	1.48518	3.7077	NA	0.711145	0.551026	1.98849	1.28146	0.598011	1.53731	0.721924	0.869767	0.482287	0.311843	2.32076	0.19716	0.327562	0.946054	1.37125	0.868545	0.787471	1.27967	0.284209
Cp794	Positive	313.174	2.67	1.87741	1.3245	0.686794	0.870245	0.99883	1.40862	3.87009	1.45083	0.804707	1.42795	0.579255	0.890245	0.355711	1.25505	0.895203	0.556631	1.91186	0.38546	1.71485	1.62416	1.3354	4.41063	0.989333	0.954264	1.15652	0.773404	1.73631	NA	0.516739	0.59744	0.497815	1.83253	0.693787	0.437248	1.20823	0.476417	1.63814	0.897233	0.786807	1.54616	2.13244	1.73427	2.13839	2.0413	0.490444	0.664172
Cp1180	Positive	314.063	5.11	NA	0.302252	0.340392	0.21369	0.270891	0.879647	1.35	0.327417	0.27437	0.368436	0.476057	0.231035	0.185943	2.87793	1.95484	0.718389	1.05629	0.319308	0.739135	0.568634	0.231488	0.505954	0.314813	1.42214	0.397316	2.09424	NA	0.193721	NA	0.616	0.40557	0.592569	0.61721	0.447551	0.567553	0.69468	NA	0.880709	0.0848903	0.0968826	0.974849	1.01886	0.605987	0.64235	0.432698	NA
Cp174	Positive	314.086	9.84	5.64227	5.8017	1.4457	0.76705	0.0824869	1.01226	4.15476	0.87409	9.47115	5.39877	8.49079	1.64448	3.74686	3.30942	12.1842	1.57564	0.964087	0.512388	0.49304	0.174091	7.03654	1.76672	2.34028	16.2251	1.94477	0.464284	3.72821	0.67508	3.44086	1.59304	1.79516	2.83266	1.18451	4.64106	1.53785	0.810349	2.53793	1.7835	0.948596	2.9226	3.12852	16.8124	2.1929	1.53135	0.839921	8.25974
Cp1414	Positive	314.102	3.05	0.563459	0.729607	0.686937	0.636535	0.349633	0.819185	1.43241	0.69321	0.273182	0.541366	0.163095	0.574965	0.511072	1.67071	1.2078	0.492763	1.31259	0.605773	0.862253	0.925966	1.36372	2.04091	0.789692	1.20736	1.46473	1.6832	1.29688	0.348875	0.347747	0.536341	0.939648	1.23493	0.615897	0.669279	0.742845	0.321391	1.1461	0.763034	0.713445	1.30657	1.35964	1.0314	1.11367	1.71668	0.367114	0.455116
Cp477	Positive	314.115	9.79	NA	0.890552	0.593934	0.70677	NA	NA	0.830384	0.238933	1.22214	0.666579	0.738856	2.53558	0.968318	0.743239	NA	0.0967124	0.143928	0.0573865	0.346776	0.168845	0.687011	2.66053	1.22172	0.164474	1.4418	0.764285	4.08243	0.599711	0.226096	0.182754	4.1428	0.0518294	0.397069	NA	0.313328	NA	2.1935	5.33398	1.12755	2.12732	7.58661	1.89199	0.639173	0.0515775	NA	1.50027
Cp450	Positive	315.077	3.72	0.509283	0.97281	1.02862	0.895574	1.89035	2.64163	1.99052	1.39937	1.03681	0.764573	0.731993	0.813801	0.868414	2.59398	2.46367	1.23619	3.86728	1.19355	1.27975	1.84473	2.17935	1.26346	1.89461	1.93642	1.48987	7.3116	2.45333	0.732343	0.811165	2.29764	1.44349	1.05128	1.07733	2.95262	1.19572	0.677603	1.29684	1.28578	1.14785	2.42871	1.83017	1.54887	1.7403	2.07745	1.20299	0.471393
Cp78	Positive	315.204	3.72	31.2211	21.6241	17.2613	9.24198	7.79999	9.10872	8.28886	11.397	11.392	11.9611	10.1564	13.9536	10.5928	11.0923	33.2538	5.98761	11.7678	10.4207	11.6042	7.53449	17.1203	14.7819	12.5442	13.8239	7.71067	18.2236	19.6714	3.3966	12.303	11.1862	8.95947	12.6226	12.0177	26.2676	10.3747	15.2407	14.9123	12.2541	8.3275	12.578	13.8211	13.0884	8.98956	9.69779	12.0344	36.9213
Cp416	Positive	315.204	3.26	4.18867	5.26971	4.57734	2.44228	2.72207	3.40331	4.64442	3.43672	4.26893	2.97887	3.84465	3.15805	2.4613	4.80447	9.05547	3.33572	4.77764	2.02209	4.21484	3.3774	4.18644	5.01268	3.32525	5.14536	3.3837	7.24669	2.84001	2.00934	2.29415	4.55043	3.4995	3.38048	3.90239	5.15452	4.16546	4.34245	3.14346	5.84576	2.54553	3.46444	5.73391	6.04882	3.9279	4.01018	4.13402	3.4905
Cp1719	Positive	315.204	3.39	0.959962	0.622357	0.485907	0.316996	0.347066	NA	0.879853	0.384736	0.510035	0.577873	0.503011	0.655948	0.52045	0.73338	0.778074	0.349513	NA	0.326905	0.450723	0.380878	0.821052	0.818138	0.560713	0.895877	0.29701	0.516318	0.829376	NA	0.544315	0.416853	0.612628	0.544141	0.431482	0.672808	0.286807	NA	0.697253	0.742649	0.405456	0.8223	0.178561	0.790523	NA	0.74388	0.414931	NA
Cp1158	Positive	315.231	3.15	0.8708	0.926669	0.669767	0.616958	0.259443	0.316684	0.673581	0.452933	0.549451	0.672344	0.574264	0.391867	0.530101	0.974662	0.719509	0.571502	0.482736	0.612201	0.871767	0.212643	2.25525	0.73091	0.742887	1.20932	0.522634	0.548236	1.31842	0.22066	0.378007	0.27596	0.665543	0.887222	0.291333	0.807595	0.565027	0.464543	0.753243	0.421437	0.317291	0.546078	0.597778	0.942111	0.702059	0.677005	0.362934	0.990981
Cp1041	Positive	316.06	4.82	0.63963	0.985718	0.975248	0.959725	1.04483	1.77018	1.89804	1.07318	0.399623	0.549372	0.360131	0.583616	0.838103	2.13841	1.60802	0.744707	1.51517	0.55762	0.901446	0.911448	1.74348	0.804524	1.15295	1.62428	1.42747	3.07913	1.02942	0.244948	0.365439	0.880038	1.26283	1.29029	0.638489	1.50228	0.581318	0.366885	0.862196	0.619106	1.00427	1.09173	1.19475	1.23629	1.36243	1.3953	0.749383	0.42269
Cp959	Positive	316.084	9.84	0.979595	1.06125	0.347833	0.196767	NA	0.164589	0.751466	0.255921	1.79379	1.05391	1.58166	0.301665	0.791209	0.716088	2.40176	0.3248	0.205809	0.146564	0.13107	0.0863747	1.41238	0.295245	0.44404	2.76974	0.493845	0.11131	0.964979	0.237294	0.550782	0.32026	0.491352	0.505371	0.355168	0.797857	0.407542	0.178106	0.460839	0.323992	0.302749	0.541835	0.642982	3.36616	0.526091	0.341955	0.209686	1.68555
Cp259	Positive	316.152	8.83	9.19677	3.73757	1.1252	1.13537	0.997974	0.414631	3.51851	1.789	1.45531	6.00114	1.30077	3.64452	1.86283	0.844406	1.57638	1.0464	2.03408	1.1884	1.56006	1.56853	6.3395	15.8793	7.48072	2.3867	4.27734	0.68449	10.367	0.482978	1.9846	0.432975	1.44239	8.41732	1.02479	1.90015	1.62196	1.9006	9.23238	2.27258	3.58164	15.7518	6.94958	2.2283	5.80694	8.90693	1.01551	3.20692
Cp1065	Positive	316.154	8.71	2.22195	1.09942	0.487195	0.433685	0.461221	0.413959	1.05706	0.447189	0.185802	0.786189	0.176696	0.397965	0.571965	0.532016	0.516738	0.403004	0.403768	0.456054	0.55112	0.385148	1.79376	3.43086	1.40349	0.53187	0.848433	0.378857	1.87222	0.199021	0.391551	0.308474	0.375881	1.73295	0.252585	0.149607	0.424465	0.472681	1.61881	0.843955	1.12702	2.42687	1.85511	1.0817	1.46143	1.60851	0.186693	0.779128
Cp880	Positive	317.096	8.66	0.801272	1.32972	NA	0.127418	0.813315	0.899263	3.15453	0.853558	0.316754	0.648166	0.313586	0.962577	0.174118	NA	NA	0.197276	0.711944	0.108462	1.0906	0.919134	1.41658	2.01986	NA	0.575791	0.652901	0.651231	0.688156	NA	0.347869	0.558288	0.425181	0.797847	NA	NA	0.3228	NA	1.76164	0.561041	0.639952	1.14336	1.1037	1.13092	0.972424	0.735758	NA	0.207403
Cp444	Positive	317.158	11.42	0.349413	NA	0.826442	0.407692	0.269179	NA	0.826767	1.87333	1.04856	6.98732	1.01975	0.937048	NA	2.97651	1.0963	0.782151	2.88764	0.484572	0.487786	0.976596	NA	NA	1.26048	1.14611	NA	0.673896	1.38193	NA	1.47103	NA	0.577571	1.23806	NA	NA	0.980146	0.934556	0.539178	1.62614	1.02353	NA	1.51922	1.58882	0.790461	0.830926	0.488745	0.640011
Cp164	Positive	317.292	8.79	NA	0.687586	NA	0.562872	4.03245	1.96634	5.40544	2.99075	2.15008	15.9345	15.3495	NA	2.48563	3.80847	10.7995	1.80009	3.79123	0.215872	1.2637	2.12972	NA	2.57536	NA	0.203052	NA	4.77131	NA	NA	NA	2.75215	NA	NA	2.99095	NA	2.44133	6.3838	NA	6.94143	5.62568	NA	3.94347	3.06817	0.861155	1.75973	0.0499066	NA
Cp242	Positive	318.044	7.3	1.88671	4.2053	2.4633	1.04235	1.08207	2.55	9.78998	2.14159	5.8007	4.63259	6.12872	2.50764	2.57398	6.28836	11.5048	3.46271	3.05297	1.06837	2.48593	1.33771	7.6665	4.09132	3.79754	12.7208	4.45893	4.03667	4.08805	1.5904	1.91529	2.66138	4.78369	3.92911	2.36665	3.35811	3.56027	1.75811	2.93684	4.68198	1.41903	3.65551	5.5095	14.3511	5.47159	4.13067	2.22842	1.69915
Cp1766	Positive	318.116	10.8	0.628411	0.556303	NA	0.366658	0.421957	0.412213	0.61365	0.41969	0.496382	0.641601	0.547934	0.636376	NA	0.805296	0.646189	0.4627	0.618044	0.44869	0.514199	0.40845	0.621007	0.86009	0.56508	0.575921	0.55507	0.692537	0.791145	0.471496	0.447922	0.540812	0.568368	0.495984	0.436736	0.702729	0.476244	0.532584	0.707729	NA	NA	NA	NA	0.675741	0.761179	0.600113	0.449813	0.651837
Cp518	Positive	318.132	5.18	3.03695	2.43752	0.911004	1.57469	2.77974	2.93802	5.80042	2.62276	2.2244	2.58145	1.85768	1.71639	0.93556	2.76464	3.82861	2.20951	4.93619	0.99544	2.1251	2.76802	3.26374	5.41383	4.22234	4.71241	4.23708	5.99868	2.98372	0.814188	1.92273	2.44991	2.2612	4.36551	2.23662	1.24385	2.39069	2.31871	2.29511	1.98843	2.32505	3.46585	3.83424	3.27101	3.32638	5.14313	1.89724	1.0627
Cp589	Positive	318.132	5.69	2.75441	2.23565	0.610245	1.51784	2.33039	2.54099	5.18806	1.90682	1.51527	2.25481	1.67687	1.34962	0.868958	2.54065	3.40436	1.61223	3.96456	0.623889	1.89804	2.37311	4.07978	6.68917	3.14976	3.39883	4.57656	4.13497	2.74997	0.826995	1.37915	2.12477	2.06138	3.74655	1.76573	1.49946	1.77578	1.63404	2.33562	2.21976	2.12304	3.54534	4.03114	3.30209	3.50151	4.69342	1.43945	0.745429
Cp882	Positive	318.132	4.29	1.98045	1.71258	0.237373	0.510334	1.08303	2.0088	3.40846	1.01549	0.657965	1.22043	0.663735	0.492564	0.351226	1.21384	0.911632	0.583591	1.57028	0.647615	0.558931	0.796038	2.10888	1.42604	1.74123	1.58075	1.50902	2.55906	1.398	0.175615	0.520644	0.530651	0.9884	1.29179	0.567429	0.387426	0.796645	0.936691	1.13889	0.775543	0.964317	1.64545	0.992222	1.24692	1.05385	2.30867	0.457129	0.506744
Cp886	Positive	318.132	5.32	1.55929	1.35553	0.389326	0.727121	1.13941	1.6119	2.50859	0.95353	1.15565	1.99558	0.791266	0.723315	0.548722	1.523	1.17586	1.38125	2.2913	0.624941	1.19426	1.43555	1.44436	2.3713	1.83074	2.07756	1.77398	2.31351	1.76065	0.349464	0.897674	0.92759	1.29176	1.94326	0.888184	0.637523	1.48455	1.06797	1.16414	1.25921	1.31829	2.40198	2.40077	2.51866	1.72691	1.98756	0.428779	0.954104
Cp342	Positive	318.154	11.42	3.42283	3.79113	4.64073	3.19252	2.61712	3.60417	4.87329	2.27456	5.65954	9.48599	6.3733	6.65989	2.60606	6.88405	8.23024	4.6775	7.96007	2.73083	4.41947	4.86712	6.74231	9.50136	7.16345	7.09612	7.68475	4.47896	6.69665	1.14363	7.78172	5.28822	3.5167	6.68831	2.5998	5.32121	4.69083	4.92987	4.28816	6.97896	5.61743	3.06149	7.15983	8.99416	4.90744	4.64658	2.49337	3.32773
Cp16	Positive	318.168	9.65	112.449	38.8862	7.18415	5.46823	4.9107	2.35168	26.0627	12.2495	12.2262	39.2212	10.6574	28.9998	10.0083	6.95709	5.75607	5.4727	11.8681	8.86172	14.5647	14.6033	100.919	161.594	31.7985	27.6583	29.2745	3.92536	99.4585	5.38724	9.78071	3.45499	11.2566	85.6436	3.82437	2.10212	21.14	8.93225	78.7345	20.5103	39.3931	119.385	54.8533	20.1284	56.281	54.7884	8.86614	15.6419
Cp1107	Positive	318.278	10.98	0.672992	0.820104	0.949922	0.729223	1.04237	1.01118	1.15458	0.936542	1.80661	2.27146	1.50754	0.960733	1.53294	1.53512	0.990428	0.912028	0.991949	0.782608	0.258449	0.989039	1.39476	1.96271	0.534786	1.40403	1.49169	0.680467	1.31187	0.351524	0.382155	0.790626	1.57024	1.93986	0.822115	0.0920224	0.818241	1.24461	0.12199	1.0705	1.3906	0.437032	1.15438	1.80216	0.766059	1.57548	0.657017	0.75166
Cp332	Positive	318.282	11.32	3.13615	3.49698	4.92431	1.28679	1.90447	2.29955	0.933326	2.76245	0.612019	2.68201	NA	0.873935	0.149923	NA	6.23189	1.05945	6.31482	2.3546	3.86097	2.98115	NA	0.182688	NA	NA	0.0306129	7.47333	NA	2.49261	0.431328	2.08101	NA	0.900145	1.12409	6.07094	2.47	6.41488	1.37088	0.447999	1.13501	0.13705	0.0883155	1.1804	NA	NA	2.9215	7.43217
Cp1675	Positive	319.053	6.92	0.811458	0.607663	0.454143	0.411563	0.333157	0.387491	0.65059	0.39818	0.37291	0.889947	0.425394	0.770118	0.746491	0.611204	0.435508	0.491051	0.32557	0.521855	0.363958	0.401374	0.767517	1.12367	0.905547	0.600423	0.660717	0.604159	1.29595	0.354321	0.883032	0.416447	0.72284	0.668341	0.283714	0.563143	0.544568	0.58875	0.805973	0.743576	0.667725	0.781142	0.888142	0.768439	0.811794	0.433603	0.417805	0.854281
Cp826	Positive	319.154	11.42	1.68344	1.05163	1.09086	0.86206	0.654546	0.815826	1.23234	0.976996	1.51491	3.36092	1.6589	2.103	0.725694	2.02706	1.77474	1.25223	1.68911	0.601682	0.943479	1.08054	1.60985	2.4693	2.24422	2.076	2.02944	1.27591	2.09302	0.472527	2.1808	1.58762	0.674417	1.72942	0.708892	1.30116	1.69243	1.51263	1.05833	1.88481	1.97042	0.747481	2.48956	3.00232	1.94345	1.68757	1.38602	1.54706
Cp906	Positive	320.019	3.32	0.592097	0.488465	0.744027	0.540198	0.4165	0.390447	0.296298	0.37447	0.815867	1.08513	0.496273	1.50294	0.611927	0.452504	1.41574	0.763108	0.922063	1.1011	0.450155	0.404912	1.00727	2.35579	0.844958	2.37576	0.358497	0.484802	0.904121	0.254369	0.725265	0.566823	0.949837	1.08651	1.49567	NA	0.802454	0.66573	1.1489	1.18602	0.601568	0.52062	1.85575	1.56182	1.8075	1.3226	0.716722	0.816895
Cp1401	Positive	320.019	4.35	0.552978	0.425295	0.247389	0.403379	0.652834	0.175607	0.354679	0.448411	0.519889	0.824138	0.354516	0.440513	NA	0.444747	0.775488	0.5439	0.351123	NA	0.496023	0.392712	0.630359	2.13083	0.424799	1.19407	0.597407	NA	0.751666	NA	0.385938	NA	NA	1.03672	0.983806	NA	0.845267	0.591819	1.01538	0.373873	0.484451	NA	1.41627	0.67206	1.12106	1.6318	0.38449	0.31867
Cp393	Positive	320.033	5.73	2.18785	3.15119	1.12448	0.555461	0.303094	0.431829	5.54984	0.669256	3.06662	4.41099	4.31035	3.06118	2.68435	3.40623	6.38538	1.77645	1.14835	0.646212	0.701787	0.304019	6.60637	2.66544	3.69915	8.42873	2.54725	2.01069	5.49011	0.630183	2.53489	1.41286	3.12493	3.44713	0.835513	2.68968	2.20934	0.827159	2.80577	2.31829	1.33899	3.8292	4.09485	9.94867	3.76588	2.5074	0.962075	3.2803
Cp980	Positive	320.09	8.19	0.431045	1.39124	1.23365	0.315668	0.520278	0.628262	0.888765	0.304685	0.428591	0.813089	0.397318	0.331732	NA	1.12835	0.563742	0.755726	0.953004	0.560658	0.834278	0.977328	1.25191	1.5606	1.11187	0.981633	1.29134	0.534825	1.06766	NA	NA	0.600285	0.421675	0.948166	0.730039	0.247416	0.730595	0.895333	1.15064	0.843183	1.17209	1.53145	1.53482	1.05771	1.75787	3.09438	NA	0.410864
Cp102	Positive	320.147	5.73	14.5422	12.5231	1.72099	3.0818	9.02788	13.0692	22.8077	14.33	4.40475	10.3423	5.22665	6.20917	3.65199	7.50624	7.3828	3.97109	20.4318	3.57281	13.2588	16.4715	17.5458	36.8982	13.1538	16.9267	14.8647	13.9366	11.1583	1.97916	5.87167	5.16562	8.81804	19.0543	4.1953	3.28994	7.91631	4.16021	11.0038	9.55406	7.44532	18.8453	15.6767	16.6044	18.967	11.4279	5.30421	4.04544
Cp1195	Positive	320.147	5.93	2.07079	1.08555	0.172843	0.302175	0.852258	1.29401	2.09863	1.58013	0.452929	0.252189	0.281267	0.437251	0.0840006	0.0340994	0.642082	0.325121	1.22608	0.210729	0.458959	1.71847	1.5532	3.15588	0.765675	0.97629	1.03928	0.364105	1.03879	0.141758	0.471105	0.362393	0.8531	1.06896	0.0558234	0.202675	0.532444	0.210792	0.612512	0.923332	0.387508	1.40939	2.07276	2.30613	2.75316	0.987418	1.16026	0.804051
Cp505	Positive	320.148	6.65	2.17383	2.01456	0.421377	0.593289	0.664175	1.84394	3.03221	1.15751	1.00642	2.07323	1.63631	0.884147	0.519499	1.07341	1.36113	0.872872	5.07289	0.549321	1.81141	1.81155	1.67585	5.17827	4.0141	2.39987	2.24321	1.83179	1.98239	0.388326	0.676215	0.754183	0.89736	2.4855	1.28052	0.676054	1.03496	1.54892	1.57249	1.40623	0.921217	2.6881	2.74196	3.76122	2.22735	3.54044	0.563475	1.12018
Cp1120	Positive	321.989	2.17	0.395912	1.15216	0.590071	0.793153	0.41864	1.29791	1.48847	0.733541	NA	0.799799	0.486914	0.603614	0.715228	2.16944	2.22561	0.90593	2.69753	1.01788	0.823059	1.81838	1.63343	2.34202	1.49655	2.28765	3.30502	2.58923	1.33886	0.669633	0.48831	0.758112	0.942935	1.15344	0.861389	1.02862	0.841983	0.746978	1.19406	0.96024	0.940998	2.17795	2.18134	1.80952	2.38379	2.79574	0.993038	1.04909
Cp1412	Positive	322	4.66	0.793596	1.26559	0.661612	0.591076	0.803686	1.0085	1.56299	0.913199	0.781556	1.69903	1.04233	1.02668	1.0515	1.80388	1.22408	0.620072	1.52625	0.512154	1.10125	1.15776	1.29555	2.23595	1.18829	1.45903	1.83808	1.77292	1.35384	0.267912	0.468177	0.677911	0.64659	1.26009	0.722815	0.711903	0.91157	0.759786	1.02784	1.18123	0.926195	1.59934	1.98525	1.25933	1.48318	1.25817	0.730701	0.559644
Cp1620	Positive	322	4.94	0.470017	0.575803	0.75347	0.431472	0.401522	0.422961	0.884115	0.635524	0.2771	0.769376	0.307347	0.93024	0.742005	1.41084	1.26165	0.305008	0.981635	0.603669	0.8925	0.803358	1.20813	1.49681	0.867338	0.977333	1.27271	1.03854	0.665373	0.377285	0.317609	0.562352	0.665434	1.13154	0.63862	0.648532	0.572857	0.452803	0.654882	1.07807	0.607725	0.845071	1.45954	0.928479	0.867429	1.08353	0.527547	0.403107
Cp1843	Positive	322.122	8.96	0.460274	NA	NA	0.340223	0.25709	NA	NA	0.296863	0.484272	0.946309	0.670349	0.399525	0.40478	0.911958	0.493312	0.690574	0.95131	NA	0.742969	0.51959	NA	1.05433	0.872114	0.647732	0.331531	1.24708	0.858556	0.163397	0.582506	0.44449	0.668282	0.492584	NA	0.638935	0.455785	0.502566	0.562691	0.530927	0.646109	0.396016	1.03839	0.558233	0.60543	NA	0.121762	0.133648
Cp1791	Positive	322.124	9.46	NA	NA	NA	NA	2.71287	NA	NA	NA	3.22405	5.99073	4.6147	NA	NA	6.12497	NA	5.16149	8.6423	NA	5.96122	4.10463	NA	7.56176	6.50149	4.21743	3.35921	5.5293	4.45772	NA	4.46592	NA	4.34865	3.051	3.78141	4.97147	3.99396	4.40742	2.94103	3.95091	4.3839	NA	5.28574	3.97524	3.87603	NA	NA	NA
Cp888	Positive	322.142	10.04	3.40378	2.05987	0.179425	0.238023	0.322994	0.0284841	0.998166	0.476643	0.377184	1.90895	0.65475	1.31913	0.800452	0.879636	1.07987	0.564334	0.333574	0.45804	0.532802	0.497509	3.32406	5.37948	1.4447	0.967949	3.3329	0.337954	4.67384	0.279541	0.772608	0.24453	0.802158	3.43625	NA	0.623833	1.41535	0.444798	3.88983	0.880864	2.06566	5.13365	2.94385	1.12751	2.80949	3.06013	0.328574	0.824525
Cp1128	Positive	322.142	8.27	0.989486	2.05672	0.499786	0.0807421	0.335404	0.911356	0.546485	0.647257	1.27354	3.17758	0.135018	NA	0.140137	NA	NA	0.138329	NA	NA	NA	0.43834	0.472871	0.220049	0.409516	NA	0.357194	0.312473	0.301322	NA	0.0181804	0.138319	NA	0.417492	0.496238	0.69666	NA	0.175705	NA	0.689526	NA	0.239024	0.33058	0.562322	0.324885	1.14012	0.156122	0.121059
Cp526	Positive	324.029	4.34	1.70809	1.40511	0.983546	1.28236	2.12251	0.4368	0.997132	1.26225	1.70214	3.15869	1.16949	1.61782	0.281633	1.4304	3.44467	2.0576	1.11494	1.00806	1.65137	1.25902	2.61156	7.59073	1.40731	4.08984	2.11164	0.843409	2.75762	0.311043	1.1583	1.38373	1.09346	3.34021	3.16736	NA	3.22068	1.8994	3.53655	1.72791	1.55698	1.53782	5.04122	2.78721	3.47599	5.39059	1.07639	1.34373
Cp1527	Positive	324.104	5.01	0.569364	0.651469	0.404779	0.373183	0.292502	0.501024	0.924672	0.391214	0.15529	0.450898	0.115676	1.0325	0.823967	1.26346	1.31702	0.500037	0.885273	0.599812	0.603946	1.2151	0.698667	0.714921	0.650503	0.369611	0.63271	0.444704	0.663501	0.0151621	0.232807	0.138319	0.429563	0.900553	0.385379	0.579092	0.653178	0.390632	0.617633	0.96024	0.338382	0.527126	1.03196	0.44386	0.973261	0.858407	0.478294	0.387211
Cp1277	Positive	324.131	4.3	1.15969	1.29758	0.989556	0.899777	0.977647	1.31846	2.04231	0.952553	0.541022	1.12084	0.612947	0.948962	0.872492	1.77737	1.8117	0.697742	1.43128	0.636395	0.870631	1.1369	1.74118	1.72683	1.42832	1.71629	1.40598	2.03697	1.20185	0.291907	0.59727	0.931248	1.10595	1.55883	0.816336	0.853183	0.903108	0.634911	0.966726	0.982169	0.816938	1.1104	1.62362	1.03154	1.01997	1.35401	0.636114	0.578719
Cp1127	Positive	324.142	3.68	NA	0.304449	NA	NA	0.155131	0.495381	0.43011	0.0403313	0.00415532	NA	NA	0.282802	0.511343	0.609103	1.66339	NA	0.540923	0.293127	0.28827	0.29609	1.35464	1.33391	0.453728	0.354624	0.825897	1.2971	0.0146682	NA	NA	NA	0.44983	0.772272	0.0179949	0.223281	0.153949	NA	0.53231	NA	0.12013	0.407473	0.827656	0.017449	0.230348	1.04617	NA	NA
Cp25	Positive	324.178	5	20.3734	46.0856	28.5665	26.1645	10.9686	52.1841	46.2663	16.5897	11.7268	30.0399	6.43819	16.9446	12.7889	32.1655	31.8686	27.5359	30.2201	17.4094	18.3179	30.5092	25.6147	60.054	18.4638	23.9179	27.8911	30.0954	29.6898	5.87714	12.3006	14.1859	15.7002	60.5179	20.2072	12.3357	16.4646	17.4911	31.2504	15.7251	37.3661	41.4236	35.1327	19.91	37.6083	97.4337	11.8472	10.0436
Cp951	Positive	324.946	5.43	3.07991	3.4187	3.542	2.58375	2.63808	2.82516	2.6526	2.78066	2.61654	3.62143	3.13449	3.4461	3.36057	3.69648	3.06164	2.48788	3.35837	3.00233	3.17423	2.911	2.96666	3.67323	3.43264	3.00537	3.24471	3.07363	3.74928	3.9127	2.92583	3.18513	2.50562	3.25723	3.2681	3.71068	2.90394	3.54251	2.58391	3.40964	2.98334	3.48197	3.95924	3.0683	3.1182	3.09831	3.35511	3.03919
Cp1046	Positive	325.024	7.07	0.894272	0.860341	0.356131	0.503587	0.56104	0.868495	1.36925	0.790738	NA	0.624468	0.314959	0.371727	0.254856	0.919231	0.825534	0.436062	1.39356	0.31884	0.878441	1.16947	0.916873	1.94545	2.62016	0.885321	1.20224	1.18726	0.998528	0.26909	0.339816	0.589582	0.533201	1.34131	0.544968	0.414242	0.696243	0.371554	0.656745	0.664045	0.649646	1.52565	1.22242	0.870816	1.25924	1.32572	0.568439	0.329225
Cp1329	Positive	325.21	4.41	0.578664	0.514968	0.248104	0.461557	0.443247	0.627993	0.856604	0.786339	0.430135	1.38103	0.698924	0.556527	0.455207	1.70352	1.09448	0.59354	1.73699	0.710144	1.2512	1.05919	1.16937	1.65527	0.860378	0.912299	1.8709	1.84346	1.70447	0.365656	0.504172	0.482558	0.568149	1.27071	0.810556	0.781061	0.447197	0.681072	1.02027	0.638255	0.742397	1.37941	1.29883	0.977146	1.08077	1.27712	0.528592	0.542732
Cp595	Positive	325.263	11.09	5.13963	3.45194	3.92474	2.18136	1.83675	2.306	5.53086	2.36183	3.74097	5.37651	3.91627	4.57986	4.44836	6.01104	4.82421	3.53749	2.2539	2.52232	2.74524	2.28869	5.09383	6.36732	4.0403	5.39573	4.5255	2.29151	6.97269	1.78485	4.59806	2.49218	5.03041	5.253	2.21941	4.46803	5.12616	3.71314	4.96377	5.02589	3.86185	4.84653	4.92411	5.54279	5.88265	5.05108	2.69587	4.68824
Cp1750	Positive	325.371	9.88	0.278261	0.00631695	0.092288	NA	NA	NA	NA	0.493387	NA	NA	0.0929653	0.172461	NA	0.0576943	0.0190145	0.0271736	NA	NA	NA	NA	NA	0.0455928	0.0569037	0.0129025	0.13652	NA	0.0861365	0.017959	NA	0.147531	0.0869862	0.0801247	0.00538532	0.0340144	0.0166704	NA	NA	NA	NA	0.17552	0.149123	NA	0.18531	0.00406122	0.0162001	NA
Cp1687	Positive	326.029	4.34	0.311032	NA	0.146802	NA	0.380874	NA	0.199556	0.228422	NA	0.603172	0.246826	NA	0.0989522	0.312066	0.605118	0.388775	0.194572	0.232234	0.346918	0.300238	0.543889	1.1289	NA	0.729969	0.329186	NA	0.547872	NA	0.183147	0.303462	0.214398	0.656098	0.604732	NA	0.566416	0.35928	0.63556	NA	0.335631	0.374518	0.926106	0.473441	0.609334	1.05186	NA	0.223934
Cp1115	Positive	326.119	9.38	2.17545	1.95125	2.38632	1.68132	1.41629	1.3839	1.46883	1.58441	1.51669	1.03341	1.74725	1.35331	2.30499	2.19788	1.18544	1.25181	1.55458	2.27396	2.15819	1.87767	1.6108	2.51742	2.06695	1.81143	1.48766	2.41436	1.8613	2.02524	1.32876	2.26553	2.06926	1.22554	2.1561	1.55944	1.06691	1.38989	0.978832	2.29528	1.6851	2.20327	2.18987	1.99546	1.7739	1.47856	1.85033	2.52062
Cp1177	Positive	326.18	10.45	3.37662	2.85869	3.0983	2.46009	2.57261	3.40586	3.26561	2.79435	1.88414	2.11951	1.9056	1.80829	1.77842	2.86338	2.59936	1.47294	3.0699	1.47873	2.32377	1.95514	2.6449	2.95277	2.07951	2.04967	1.95623	2.48396	2.76261	1.08872	1.65332	2.60923	1.95478	2.13439	1.77374	2.16182	2.19747	1.24394	1.81903	1.98889	1.14694	3.46005	2.45675	2.46863	2.24268	1.78085	1.73576	1.82631
Cp907	Positive	326.191	11.19	1.39071	1.00742	1.34812	0.882965	0.624697	0.881394	1.92697	0.888145	1.4096	1.89726	1.92544	2.27362	2.14297	2.58574	1.45362	1.57072	0.735034	0.959676	0.921043	0.792378	1.97185	2.21394	1.87523	1.88351	1.81033	0.833082	3.04255	1.4376	1.84086	0.961458	2.39135	1.66657	1.04423	1.4001	2.21325	1.01781	1.87455	1.98071	1.7992	2.07216	2.15448	2.2088	2.28981	1.79208	1.00676	1.41583
Cp643	Positive	326.193	3.96	1.17209	1.26682	0.875519	0.592072	0.759286	1.0222	1.12707	1.36051	4.12635	1.4081	0.959352	0.923858	1.04607	1.34669	1.39141	0.618788	1.55904	0.611967	1.03209	1.27232	2.43768	1.95036	1.33198	1.21531	1.45991	1.33076	1.7658	0.508003	0.833372	0.690104	1.11132	1.54087	1.13249	1.07491	0.868883	1.26489	1.13097	1.19713	1.10462	2.75712	1.98235	1.16213	1.62861	1.53094	2.18152	0.784468
Cp842	Positive	326.327	12.01	1.54704	1.75419	NA	0.53876	0.82059	2.55067	1.40684	1.38972	0.987066	3.35355	1.10735	1.49017	NA	1.22855	2.19808	1.46716	4.00967	0.506661	1.40854	NA	1.80678	NA	NA	0.283725	1.5412	0.410238	0.191935	2.62745	0.554686	NA	NA	NA	NA	3.15487	2.46786	2.15808	2.78145	1.75787	1.35824	0.65668	2.19003	NA	0.690625	2.29242	1.99039	1.02659
Cp1769	Positive	328.149	10.38	NA	0.44301	0.437402	0.514537	0.360546	0.385744	0.63677	NA	NA	NA	0.357012	0.415694	NA	0.613467	0.326593	0.348443	0.427936	0.411874	0.347202	0.41394	0.759521	0.917556	0.395187	0.722932	0.445515	0.654182	NA	NA	NA	0.220687	0.352656	0.431912	0.404424	NA	0.476749	0.390766	0.430109	0.388235	0.434801	0.365467	0.541958	0.719773	0.518561	0.574121	0.304927	NA
Cp38	Positive	328.152	11.25	29.4602	34.8616	4.03949	7.84304	29.7431	25.7916	53.0859	26.7779	23.1011	75.8516	43.4531	19.6755	9.30123	22.3804	16.7577	22.8235	47.0186	10.7403	32.8894	42.7548	49.0975	88.1498	51.9916	28.3192	27.0342	25.0866	29.3384	3.96584	29.8716	15.3132	12.9692	37.3955	14.1518	15.5817	26.6688	28.0196	42.0962	49.3322	36.1308	37.7531	61.7906	43.8765	62.2509	53.2467	6.78926	11.3284
Cp1023	Positive	328.295	11.57	NA	4.51181	1.09987	2.98215	0.946835	0.970608	1.53018	1.70223	0.456254	2.06347	0.20677	3.03863	1.4276	NA	0.220873	0.661153	1.17636	2.14305	1.08023	0.92804	4.10092	3.88346	2.19523	0.745087	1.72396	NA	4.14984	NA	1.93469	NA	NA	1.89592	NA	NA	0.374959	1.11133	6.55953	NA	NA	4.47838	0.707489	NA	1.08244	2.42103	0.0982455	8.77081
Cp1688	Positive	329.115	7.75	0.619997	0.600934	0.659465	0.397517	0.35188	0.548184	0.899227	0.433378	0.477268	0.517188	0.436625	0.346482	0.372974	0.660495	0.414668	0.369625	0.288164	0.22978	0.315677	NA	0.801671	0.902675	0.813982	0.461623	0.777828	0.563524	0.819389	0.323703	0.526867	0.47443	0.770825	0.72017	0.179292	0.585725	0.482811	0.357946	0.525908	0.556717	0.387508	0.331947	0.882029	0.583588	0.752116	0.689324	0.343598	0.307607
Cp1489	Positive	330.038	5.91	0.270142	0.25872	0.277436	NA	0.0886922	0.257566	0.724729	0.143237	0.362225	0.777543	0.453845	1.03831	1.16853	0.854587	0.389873	0.485488	0.250758	0.300607	0.248792	0.193001	1.70106	1.86915	1.49396	0.820939	0.575783	0.162674	0.913016	0.402899	0.748936	0.199147	0.758774	0.783291	NA	0.807878	1.24548	0.23454	0.634745	0.675473	0.526634	1.53527	0.933345	0.548554	1.22703	0.824563	0.319298	0.716055
Cp1536	Positive	330.139	5.89	0.903719	1.01085	0.704966	0.865821	1.53901	1.18182	2.25698	1.07342	0.778944	1.07825	0.84143	1.12412	0.654199	1.68396	1.10147	0.944123	1.76177	0.591748	1.00156	0.996237	1.16313	1.90793	1.36937	1.0928	1.22764	1.99554	1.87597	0.172818	0.706231	0.73332	0.810484	1.54291	1.0437	1.74433	0.896541	0.723764	1.09477	1.03622	0.761916	0.85879	1.64212	0.795976	1.78087	1.12117	0.243915	0.286371
Cp1031	Positive	330.143	5.89	0.948891	0.843587	0.978968	1.06679	1.53612	1.5368	2.65777	1.1338	0.805656	1.58215	0.949993	1.25488	0.802763	1.62191	1.16141	0.795738	2.35288	0.751986	1.17623	1.25317	1.68642	2.34676	1.65894	1.41849	1.13229	2.29956	2.01219	0.206381	0.709769	1.17253	1.03277	1.84573	1.13328	2.24848	0.989744	0.479085	0.366902	1.2745	1.01371	0.923426	1.90498	1.06521	2.13755	1.25654	0.347909	0.429175
Cp648	Positive	330.216	11.09	4.33201	3.40854	3.77279	2.27151	2.21891	2.45594	5.22616	2.50054	3.43918	4.24158	3.78038	4.15509	3.23334	4.51535	4.08675	3.26308	2.10628	1.94436	2.30516	1.90256	4.72559	6.18574	3.42377	5.17743	3.22868	2.36125	5.54285	2.14448	3.29164	1.88878	3.68355	3.83592	1.73985	3.52889	3.92627	2.62343	3.3616	4.90822	3.66469	3.69285	4.49042	5.1994	4.06859	4.53909	2.65981	2.70107
Cp861	Positive	330.274	9.91	2.95502	1.69596	1.35027	1.30216	0.640317	0.793523	1.11932	0.649945	NA	1.55797	0.623679	1.89764	3.76739	1.11752	0.488597	NA	NA	0.84724	0.414086	0.409182	1.47987	2.23563	1.41522	1.05006	NA	1.01399	1.78952	NA	1.52057	0.349523	0.590498	0.982038	NA	0.880987	0.557954	NA	1.3689	0.552084	0.966413	1.43839	1.61815	NA	0.513123	NA	NA	3.61855
Cp1403	Positive	330.274	10.74	1.62985	1.01483	0.515239	0.57902	0.362044	0.658492	0.685335	0.616703	NA	0.906439	0.286633	0.706438	0.952143	0.407092	NA	NA	0.262303	0.223702	0.212581	0.201175	0.782155	0.947951	NA	0.367396	0.2776	0.484668	0.606076	NA	0.663891	NA	NA	0.505235	0.240238	0.388978	0.367507	0.29124	0.558152	NA	0.746327	0.562626	0.528123	0.319944	0.340502	0.321513	NA	1.56321
Cp908	Positive	331.07	3.89	2.07551	1.53076	0.643154	0.43103	1.09437	0.431829	0.593113	0.534451	1.96535	2.0079	1.36378	0.868546	0.260565	NA	1.58748	1.33001	1.48115	0.532491	0.800623	0.538012	1.31954	4.36314	1.68814	2.0889	0.609913	0.431964	NA	NA	1.68029	1.2068	0.627966	1.78995	1.51761	NA	1.00932	NA	1.2206	NA	0.532529	NA	2.40398	2.43564	1.9507	1.37513	NA	0.626913
Cp1503	Positive	331.225	4.82	0.392222	NA	0.20475	0.23559	0.098642	NA	0.833096	0.239666	0.451742	1.13173	0.391702	1.573	0.820977	1.29384	0.385158	0.745349	0.260918	0.207223	NA	NA	1.17669	1.40309	1.12784	0.823024	0.650166	0.275995	1.518	0.203878	0.650957	0.148208	0.608137	0.828455	NA	0.276349	0.999595	0.381294	0.977784	1.11081	0.474626	1.14406	0.14124	1.30268	1.17795	1.04116	NA	NA
Cp1585	Positive	331.235	4.13	0.971771	0.677012	0.725283	0.360685	0.444317	0.410735	0.763995	0.407346	0.679335	0.61326	0.67559	0.476679	0.495033	0.948159	1.11973	0.389738	0.354663	0.402875	0.508235	0.41089	0.740682	0.801357	0.582819	1.25949	0.677392	0.493251	1.24742	0.190188	0.465981	0.37296	0.743436	0.658547	0.352541	0.939842	0.750296	0.552329	0.800037	0.603972	0.324103	0.660075	0.569144	0.936113	0.642798	0.606476	0.496976	0.922949
Cp961	Positive	331.272	9.57	2.47098	1.08555	1.92488	0.445741	1.44593	0.693694	0.840329	0.860402	0.324827	0.416312	0.348526	0.393569	0.457926	2.3889	0.319596	4.6836	1.01689	1.7036	1.11559	1.21827	8.60492	0.644632	9.28595	0.430866	2.73341	3.05741	0.585635	0.684207	2.77758	1.4325	7.21252	0.861919	6.91107	18.2314	NA	1.4498	0.467125	0.705278	1.94619	1.26655	NA	0.556597	0.478125	11.3193	1.06542	1.03282
Cp961	Positive	331.272	9.57	2.47098	1.08555	1.92488	0.445741	1.44593	0.693694	0.840329	0.860402	0.324827	0.416312	0.348526	0.393569	0.457926	2.3889	0.319596	4.6836	1.01689	1.7036	1.11559	1.21827	8.60492	0.644632	9.28595	0.430866	2.73341	3.05741	0.585635	0.684207	2.77758	1.4325	7.21252	0.861919	6.91107	18.2314	NA	1.4498	0.467125	0.705278	1.94619	1.26655	NA	0.556597	0.478125	11.3193	1.06542	1.03282
Cp292	Positive	331.272	9.57	2.36588	1.35608	1.94592	0.645937	1.51354	0.595478	0.643615	1.04678	0.46492	0.638879	0.368492	0.466751	0.587732	2.65475	0.255707	4.90848	0.618352	2.14913	0.909256	0.792744	8.20415	0.278306	9.21731	0.243062	2.76806	3.10448	0.18226	1.12862	2.4363	1.1793	7.37904	0.498161	7.42045	18.9215	0.532696	1.36908	0.793867	0.966881	2.32007	1.17221	NA	0.17449	0.607661	11.5684	0.61926	0.944821
Cp292	Positive	331.272	9.57	2.36588	1.35608	1.94592	0.645937	1.51354	0.595478	0.643615	1.04678	0.46492	0.638879	0.368492	0.466751	0.587732	2.65475	0.255707	4.90848	0.618352	2.14913	0.909256	0.792744	8.20415	0.278306	9.21731	0.243062	2.76806	3.10448	0.18226	1.12862	2.4363	1.1793	7.37904	0.498161	7.42045	18.9215	0.532696	1.36908	0.793867	0.966881	2.32007	1.17221	NA	0.17449	0.607661	11.5684	0.61926	0.944821
Cp602	Positive	331.272	9.57	2.281	0.903735	1.83145	0.24831	1.44732	0.457089	0.782077	0.619636	0.277219	0.370197	0.17183	0.233305	0.499654	2.45726	0.384397	4.77603	0.761048	2.04967	0.798209	0.961346	8.45014	0.450388	9.2083	0.342764	2.99381	3.20519	0.376067	0.543038	2.4845	1.47057	7.16015	0.743977	7.21594	18.8661	0.339471	1.5756	0.542786	1.1559	2.13916	1.3507	0.165531	0.363976	0.248893	11.3653	0.803079	0.988183
Cp1279	Positive	331.321	9.64	1.05311	0.128948	0.152239	0.0595058	0.287474	0.237949	0.131229	1.47332	0.047608	0.102637	0.112557	0.138139	0.104389	0.314329	0.606639	0.0847303	2.20495	0.119331	0.154359	0.119436	0.137565	0.995444	0.22625	0.844789	0.0730801	0.210416	0.007022	0.114672	0.104934	0.147396	0.113279	0.0397223	0.229204	0.0148196	0.116567	0.182242	0.080318	0.252183	0.0296068	0.203948	0.122741	0.406372	0.420817	0.109788	0.276969	0.112412
Cp351	Positive	332.083	7.93	2.32661	3.63472	0.719131	0.79448	2.03168	2.89489	5.65989	4.15266	1.79937	2.8844	1.9474	0.684597	0.532683	2.79745	3.55297	1.73975	6.26787	1.03331	7.14724	7.17715	5.30743	13.1173	1.41604	6.66656	7.6484	5.31821	2.8166	1.29525	0.241104	1.74748	2.15548	4.37272	2.16188	0.298932	4.31865	1.64965	3.19107	5.27808	2.18383	6.62875	6.77648	2.83342	9.04728	7.44909	2.59724	0.326427
Cp524	Positive	332.146	6.85	6.73317	2.4025	0.695808	1.00375	0.571096	0.201404	1.93924	1.0799	0.467414	1.89998	0.352519	1.05732	0.704219	0.616376	0.390482	0.709082	0.31695	0.53553	0.448451	0.474695	2.67675	6.75518	2.29839	0.548683	1.3045	0.201431	2.7403	0.12689	1.19527	0.308339	0.59006	3.35762	0.246674	0.65079	0.817988	0.53165	2.15334	0.667597	1.19056	3.80883	2.31149	1.18067	1.6254	3.07746	0.371426	1.1006
Cp348	Positive	332.292	11.96	0.448022	1.04944	1.27629	NA	NA	NA	1.24952	6.53661	0.823109	NA	1.01264	1.29672	0.996454	0.799155	1.14254	0.117681	0.960085	NA	0.73601	0.26803	NA	1.94529	1.72703	0.485213	0.0169348	0.603891	0.389487	0.286607	0.519668	NA	0.539884	0.624402	0.0333627	NA	0.451617	NA	NA	0.574631	0.639035	NA	3.89746	NA	1.47146	0.367947	NA	NA
Cp846	Positive	333.133	4.1	NA	NA	0.379311	0.171328	0.308978	0.480198	0.766449	0.283786	0.399266	0.845914	0.342037	0.538657	0.340624	0.515694	0.49027	0.202839	0.382525	0.408017	0.30957	0.378194	0.837994	0.491706	0.459187	0.667672	0.413079	1.00742	0.347511	NA	0.231709	0.336788	0.464949	0.320499	0.200439	0.23556	0.380768	0.187178	0.31161	0.573858	0.520215	0.246237	0.547588	0.320899	0.501829	0.464874	0.379003	0.245425
Cp934	Positive	333.229	6.68	0.75123	0.512634	0.510517	0.32872	0.328664	0.296127	1.57875	0.39378	2.09796	1.71056	1.82861	1.20198	1.61028	1.66118	1.06633	1.28165	0.45903	0.353085	0.43567	0.281328	2.15563	1.72065	1.49055	2.57672	1.28196	0.80492	2.24876	0.450593	1.2137	0.405473	1.07714	1.58535	0.314056	0.675913	1.0909	0.564202	1.91785	1.37535	0.996413	1.48237	1.95195	3.17436	1.80499	1.25817	0.306756	0.561552
Cp1174	Positive	333.3	12.47	0.276784	0.541198	0.110889	NA	0.136515	1.09731	0.341505	0.739897	0.451505	1.85851	0.824584	0.248338	0.155632	0.371054	0.61105	NA	0.547542	NA	0.631353	NA	0.724147	0.147702	0.0503536	0.501113	0.875529	0.0293698	0.0564881	0.831853	NA	NA	NA	0.615695	0.169835	1.8293	1.16289	0.56607	1.33211	0.295577	0.495586	NA	1.16789	NA	0.950951	0.836747	0.555897	0.294382
Cp1333	Positive	333.96	5.73	1.23276	1.47501	0.787095	0.461225	0.348457	0.590372	1.59373	0.611447	1.40034	1.76116	1.70432	1.38409	1.28801	1.36899	1.85521	0.915451	0.683466	0.48913	0.656772	0.362091	1.9438	1.27992	1.62196	1.97943	1.20302	0.747253	1.87425	0.571448	1.24774	0.719366	1.31893	1.38674	0.720319	1.478	1.17426	0.610897	1.25948	1.37581	0.936151	1.54984	1.68362	2.35071	1.44637	1.30595	0.595091	1.37323
Cp1468	Positive	334.02	6.09	0.583978	NA	1.23237	0.608995	0.56778	NA	1.0705	0.273031	NA	NA	NA	NA	NA	1.05175	NA	NA	NA	0.89703	0.668842	NA	NA	NA	1.43405	1.16918	1.24862	NA	1.37709	0.307805	NA	0.608955	NA	NA	1.04226	NA	NA	NA	NA	NA	NA	NA	NA	0.951109	NA	NA	0.603452	NA
Cp1102	Positive	334.036	9.06	1.52844	1.30541	1.17971	NA	0.618492	NA	1.77998	NA	1.2758	1.71296	1.5738	1.75964	1.40286	1.7061	1.58535	1.11209	NA	NA	0.983383	NA	1.95708	2.13732	1.72908	2.30733	1.53064	1.17117	2.20834	NA	1.23432	NA	1.49914	1.63582	NA	1.60827	1.47142	NA	1.50707	1.75153	1.14523	1.60528	1.9238	2.02804	1.85338	1.6276	NA	1.63671
Cp763	Positive	334.071	3.96	0.904753	1.17454	0.456289	0.720485	0.805184	0.842161	1.695	1.11204	0.777638	2.01575	1.36204	0.590708	0.321595	2.42542	1.75222	0.759685	3.54309	0.627746	2.10962	2.41813	1.52175	2.4093	1.94878	1.7249	2.39484	4.09273	3.06596	0.846426	0.811043	1.00007	0.83601	1.9419	0.928639	1.56424	1.3594	2.02267	1.45701	1.72683	0.62266	2.53875	1.99104	1.59631	2.15526	2.16964	0.779301	1.00942
Cp1803	Positive	334.071	4.62	0.762596	0.560286	0.179139	0.563757	0.437898	0.281616	NA	0.692843	0.469194	1.82857	0.391952	NA	NA	1.02508	1.08246	1.00521	1.02935	NA	0.940923	1.0809	0.44468	4.80276	0.66142	1.53253	2.17912	1.12691	0.838895	0.384351	0.445726	0.535799	0.401846	1.82559	1.31021	NA	1.33477	1.01514	1.31035	0.371402	1.57217	0.525995	1.93039	1.87822	1.24544	1.94749	NA	0.524547
Cp311	Positive	334.163	7.81	6.64061	3.60244	0.0889971	0.130072	0.324812	NA	1.66516	0.985429	0.334918	2.71563	0.610202	1.3109	0.525344	0.0383013	NA	0.0328437	0.744885	0.756077	0.157199	0.598279	6.09528	12.0178	5.90215	1.29442	2.42454	0.0847566	3.85617	0.134839	0.185465	0.0735623	0.570998	6.46113	0.065806	0.0145373	1.29411	0.494294	4.61561	1.12996	2.5564	12.2981	2.815	0.816696	3.47711	6.88986	0.664203	0.687062
Cp1823	Positive	334.163	12.04	NA	0.972947	0.482187	0.0596164	0.0596987	NA	NA	0.331695	NA	0.928216	0.13377	NA	1.29358	NA	0.187863	NA	0.500592	0.060776	NA	NA	0.0456742	0.283689	0.0901999	0.145837	NA	NA	0.634789	0.0917084	0.620453	NA	NA	0.572436	0.0637044	NA	NA	NA	0.350955	0.136206	NA	0.27014	NA	NA	NA	0.255315	0.143188	0.682102
Cp1470	Positive	334.179	9.04	1.62041	1.41719	1.56975	NA	1.25913	NA	1.48898	NA	NA	1.28608	0.635658	NA	NA	NA	NA	0.753694	1.22085	NA	NA	NA	NA	1.02362	0.643544	NA	0.636227	NA	0.94282	NA	NA	NA	NA	NA	NA	NA	NA	0.898535	0.573168	NA	0.377814	1.08395	NA	NA	0.606127	0.30229	NA	0.883274
Cp781	Positive	334.199	7.11	0.664725	1.08445	0.422378	0.793374	0.546596	0.72715	0.561856	0.962208	0.472519	1.43996	0.737608	0.013899	0.501421	2.6966	2.07243	0.511806	2.31609	NA	0.796363	1.12446	2.90513	1.75295	1.0244	2.59497	1.03771	0.764553	1.38614	0.809183	0.541631	1.3588	0.0626651	0.194394	0.672902	0.487493	0.666944	1.13147	2.05393	1.99059	0.743838	1.60754	2.26419	1.82901	0.624532	1.37378	0.402258	1.01463
Cp1330	Positive	335.048	8.36	0.399012	0.406344	0.160538	0.485227	0.16583	0.112593	0.835809	0.293197	0.0541378	0.312234	0.153611	0.0156009	0.294954	0.722391	2.25573	0.256866	0.145621	0.0504908	0.172394	0.161526	0.126722	0.738667	0.34729	0.858082	0.220022	0.183192	0.469069	NA	0.23903	0.361851	0.670254	0.493944	0.184546	0.454325	0.690434	0.139416	0.376098	0.868664	0.155501	0.367022	0.563192	0.357841	0.913025	0.17003	0.199888	0.77455
Cp801	Positive	335.069	7.3	0.556078	1.62249	0.820576	0.272643	NA	0.903831	3.24003	NA	1.8617	1.50609	2.17352	NA	0.693209	1.99797	3.90908	1.09379	NA	NA	0.908688	NA	2.7742	2.45141	1.50706	4.47743	NA	NA	1.31421	NA	0.490994	0.8692	1.892	1.26894	1.1698	1.25176	1.27276	0.584615	1.05217	1.58274	0.497944	NA	2.10413	5.10452	1.49112	NA	0.674654	0.454226
Cp1737	Positive	335.282	5.95	0.447874	0.281516	0.386751	0.231498	0.336474	0.265493	0.319289	0.149715	NA	0.582677	NA	0.767424	0.494897	0.664535	0.69943	0.183796	0.762896	0.369915	0.35274	0.872897	0.886379	0.883994	0.844549	0.156264	0.518465	0.745778	0.503087	0.152798	0.182903	0.251575	0.471194	0.424022	0.252191	0.292439	0.390492	0.250549	0.563739	0.450779	0.345194	0.458106	0.448012	0.977691	0.483981	0.410589	0.354834	0.496571
Cp196	Positive	335.317	13.26	5.84199	8.73469	2.02232	1.30271	2.28342	11.2032	5.71543	6.91426	5.07708	20.3857	5.73552	5.78496	2.15887	6.73133	7.79625	4.18581	13.6348	2.62505	10.5941	1.70761	3.57127	2.57694	2.57308	2.62703	9.11027	2.2254	1.42843	11.5049	1.90394	2.72546	2.60586	6.62029	1.92834	16.2006	12.938	12.3536	9.93801	5.46401	7.84619	3.38396	12.8567	4.15137	4.51744	8.61263	5.89826	3.38546
Cp1298	Positive	336.014	2.04	0.357827	0.500549	0.887395	0.369533	0.355946	0.864061	1.10576	0.409791	NA	0.629432	0.680207	1.10384	0.756957	0.857819	0.98769	NA	1.45852	1.18911	0.948024	1.06248	1.35098	1.05576	1.02358	0.959478	1.19638	1.42973	1.35322	NA	0.523694	0.487977	1.91238	0.72534	0.304862	1.42338	1.06375	0.659326	0.532892	1.75709	0.756152	0.634616	0.621587	0.911848	0.969914	0.632197	0.735143	0.940497
Cp185	Positive	336.014	6.09	6.51115	13.6674	12.0374	6.98983	6.01106	10.5367	11.377	4.11172	3.44274	14.2377	7.56588	6.32107	5.70049	11.5216	10.5074	9.03544	10.9328	8.72392	6.9517	13.2274	12.4449	14.8402	12.9256	12.0984	13.1107	9.60231	13.2149	3.00106	2.71328	6.34641	4.92031	14.4225	11.3659	5.87574	9.81661	11.9162	10.6478	10.465	13.1729	16.2538	20.9824	9.7352	17.6579	20.1312	5.53232	8.64289
Cp600	Positive	336.014	3.57	3.2352	2.59915	2.1262	1.13094	1.67649	2.51439	3.75345	2.36525	1.87844	4.29858	2.41286	3.97299	2.33883	4.18179	3.22136	0.933639	4.38065	3.38557	3.79735	4.86199	5.81188	4.59142	4.26518	3.36886	3.52778	3.59639	4.64294	0.997311	1.50361	2.09023	2.55339	3.65826	2.21113	3.28571	3.48311	3.55945	3.52479	5.43421	2.05296	5.0222	4.32987	3.70901	4.93867	5.08438	2.48645	3.13431
Cp1822	Positive	336.015	7.23	0.270732	0.638149	NA	0.359911	0.235585	0.310234	NA	0.188946	NA	0.662416	0.370738	0.403922	NA	1.17958	0.738067	NA	NA	NA	0.907126	NA	2.0098	2.39141	0.656644	0.876198	0.688204	0.45503	0.624022	NA	0.221826	0.762989	0.321214	0.84369	0.374608	NA	0.249046	NA	0.927032	1.28392	0.684231	1.06953	NA	0.994595	0.959038	0.838777	0.302183	NA
Cp755	Positive	336.015	7.11	0.559031	1.35746	NA	0.93506	0.619989	1.10053	0.373021	1.11547	0.899566	2.93644	1.16425	0.33386	1.54572	3.06362	1.71404	0.751447	4.25073	0.654744	1.62212	1.93209	3.86212	5.2503	0.98251	2.83464	1.3415	1.43349	1.75066	0.651822	0.312118	1.7636	0.371061	0.344033	0.750267	1.97481	0.280493	1.00286	1.99421	1.17675	1.18165	1.76114	1.34983	1.96315	NA	1.60351	0.436356	1.34131
Cp1029	Positive	336.015	6.56	0.432226	0.124828	0.547861	NA	NA	0.190521	0.525432	0.252621	NA	0.489807	NA	1.82744	1.4851	0.380104	2.12354	0.0802371	0.664532	2.56778	0.317665	0.757121	1.39869	0.516877	1.05947	2.33275	0.402788	0.732099	0.453777	NA	NA	0.352909	1.78826	0.375865	1.6902	0.406762	2.32995	0.363817	0.341759	1.27033	1.26733	0.364477	0.603731	0.546645	1.33691	0.520648	1.61491	1.75065
Cp1774	Positive	336.038	9.07	0.405655	0.376133	0.308485	0.190352	0.205736	0.275167	0.489654	0.241377	0.411495	0.497173	0.477555	0.481076	0.428702	0.512623	0.544271	0.334642	0.339424	0.262856	0.269241	0.188365	0.580212	0.517669	0.525233	0.651121	0.440695	0.353644	0.677389	0.156626	0.372638	0.214591	0.384098	0.464696	0.223556	0.507252	0.412972	0.289772	0.419283	0.459118	0.28716	0.511993	0.563997	0.51352	0.495136	0.496687	NA	0.483728
Cp1008	Positive	336.139	4.4	1.94162	1.59723	0.343969	0.518187	0.838136	1.01508	2.46764	1.75417	0.469551	1.11636	0.58487	0.321095	0.513518	0.829214	1.36874	0.569362	1.31182	0.29827	1.14342	1.57378	1.31913	3.35883	1.01103	1.68436	1.79392	1.30219	1.02334	0.268059	0.572989	0.589311	0.73763	1.84722	0.443961	0.187856	1.04001	0.425987	0.861032	0.723964	0.761392	1.99932	1.52951	1.82629	1.42057	1.99582	0.755263	0.415441
Cp894	Positive	336.161	12.04	3.04108	1.02541	0.647447	0.833192	0.269072	0.424977	0.620495	0.544229	0.345485	0.950312	0.234472	0.627015	1.12082	0.396426	0.600402	0.240283	NA	0.572814	0.343083	0.243142	0.859001	0.948743	0.763492	0.308096	0.410082	0.550784	1.52471	NA	1.01676	0.245208	0.355285	0.386476	0.118083	0.696096	0.320274	0.278299	0.83973	0.162305	0.759558	0.708587	0.417448	0.296088	0.810121	0.616493	0.0644083	2.15325
Cp1797	Positive	336.228	9.56	0.64524	0.163279	0.586064	0.0171439	0.306304	NA	NA	NA	NA	NA	NA	NA	NA	0.549955	NA	1.97512	0.0888198	0.469261	NA	0.409304	3.27513	NA	3.87191	0.0497854	0.958118	0.920387	NA	0.0733079	0.738077	0.441916	2.88216	0.204597	2.95365	7.90899	NA	0.302046	0.105112	0.0165239	0.893837	0.408038	NA	0.0184033	NA	4.70086	0.496715	0.356183
Cp1393	Positive	337.138	3.84	NA	0.488739	NA	0.349403	0.268323	0.371905	0.691147	0.386936	0.077645	0.615341	0.145874	0.471573	0.222235	0.477231	NA	0.271843	0.254452	0.289504	0.59713	0.557044	0.934357	2.15711	0.405012	0.581656	0.660978	0.563524	1.01008	NA	0.192054	0.311725	0.410391	1.11699	NA	NA	0.388093	0.226802	0.700512	0.493092	NA	0.592469	NA	0.732996	0.504199	1.68405	0.183557	NA
Cp1606	Positive	338.014	3.57	0.909624	0.776298	0.551868	NA	0.493638	NA	1.05383	0.675244	0.805419	1.32211	0.909687	0.781181	0.539208	1.19623	0.752974	0.221882	1.08908	0.691677	0.833852	1.18375	1.21396	1.23069	0.853692	0.819896	0.982478	0.809613	1.02771	0.198284	0.331885	0.623993	0.558947	0.719626	0.574259	0.78219	0.802075	0.770192	0.765698	1.3687	NA	1.20757	1.08424	1.01981	1.3945	1.30636	0.484957	0.688079
Cp1119	Positive	338.015	6.09	1.03008	1.77712	1.6629	1.06712	0.910245	1.49971	1.58908	0.537995	0.585068	2.16626	1.16425	0.957613	0.841229	1.76848	1.65533	1.3299	1.80349	1.33579	1.1562	1.95124	1.91412	2.20318	1.99763	1.76465	1.87598	1.3486	2.17822	0.522723	0.557127	0.973786	0.735877	2.12229	1.69178	0.966517	1.42115	1.78413	1.55433	1.79524	1.84492	2.45021	2.9749	1.4803	2.50775	2.49968	0.835087	1.32911
Cp1646	Positive	338.045	8.25	NA	0.0985993	0.301331	NA	NA	NA	0.606933	NA	0.662476	0.525994	0.459211	0.970945	0.363323	0.594559	NA	0.388347	NA	NA	NA	NA	1.16232	0.87038	0.33187	0.279294	0.308734	NA	1.55467	0.274684	0.388012	NA	0.84817	0.572844	NA	0.0491162	0.553029	NA	0.391114	0.619261	0.414757	0.345383	1.26006	0.313537	0.379962	0.276704	0.0729003	NA
Cp760	Positive	338.045	4.97	0.371555	0.552595	0.612821	NA	NA	NA	0.282736	NA	0.50125	0.696842	0.291749	1.89778	1.11144	1.11106	4.72138	1.06844	NA	1.01893	NA	0.265224	1.28403	2.36829	0.617207	2.35712	0.448902	0.555209	0.902093	NA	0.481721	0.610445	0.775755	1.0389	1.1078	NA	0.701042	NA	1.1617	1.06324	0.462966	0.382156	1.98203	1.29464	1.64478	1.37784	1.45539	1.01184
Cp1429	Positive	338.16	12.04	0.800682	0.417193	0.293748	0.205063	0.161122	0.0628799	0.126321	0.169636	NA	NA	0.0257058	0.110908	0.461731	0.171628	0.155463	0.132231	NA	0.17216	NA	NA	0.329071	0.401787	0.252587	0.0449633	NA	NA	0.448628	NA	0.389232	0.0550024	NA	NA	NA	0.189126	0.00593569	0.0434926	0.303695	NA	0.295806	0.241994	NA	0.107421	NA	0.108841	NA	0.833553
Cp814	Positive	338.173	6.65	2.97554	1.7844	2.02175	1.34452	1.18788	1.06117	3.43804	1.43531	2.69169	3.15052	2.59641	3.42497	2.98134	3.16058	3.1053	2.0407	1.59752	1.25678	1.57796	0.987453	4.10418	4.31359	4.00618	3.72439	2.52862	2.25986	4.41434	1.01218	3.40877	1.46081	2.91185	2.95863	1.3751	2.46414	2.73383	2.1278	3.18769	2.91562	2.29859	3.27774	3.73531	4.24829	4.32013	2.7906	1.32422	2.63825
Cp1743	Positive	338.969	4.24	0.185999	0.525268	0.332237	0.159715	0.194823	0.239562	0.634445	0.327417	0.489259	0.594686	0.466324	0.322655	0.388061	0.604902	0.571804	0.370588	0.305405	0.23539	0.227066	0.195319	0.780122	0.59524	0.638358	0.921291	0.530059	0.386367	0.499966	0.214624	0.345672	0.300888	0.490585	0.518158	0.23262	0.46731	0.460458	0.324326	0.340013	0.563357	0.270391	0.561212	0.731619	0.780571	0.630249	0.621502	0.298395	0.238558
Cp1110	Positive	338.97	5.12	NA	0.850453	0.691659	0.209929	0.457476	0.747707	2.11322	0.85478	1.14639	0.540405	1.17111	0.227915	0.257711	1.63176	1.88624	0.780867	0.923756	0.230715	0.72252	0.541916	0.790422	0.609013	0.499306	2.73846	1.17697	1.35584	0.310528	0.590879	0.196812	0.798348	1.18998	0.506459	0.81581	0.713738	0.869389	0.513772	0.271801	1.37504	0.173056	0.477341	1.15663	2.62703	1.2248	0.981191	0.73645	NA
Cp1718	Positive	339.239	5.23	0.204599	0.371739	0.473602	0.365662	0.238902	0.340599	0.618429	0.40808	0.293009	0.183978	0.291749	0.254011	0.353401	1.02912	0.819601	0.301263	0.666071	0.301542	0.509229	0.448953	0.500926	0.897134	0.30103	0.715894	0.600664	0.895845	0.978086	0.37228	0.214749	0.321344	0.383002	0.762613	0.458803	0.22187	0.526887	0.47068	0.703073	0.727207	0.666022	0.669409	0.952166	0.42423	0.546588	0.865717	0.434527	0.360634
Cp874	Positive	339.991	8.64	0.838767	1.28619	0.594649	0.25196	0.16936	0.514594	1.50836	0.390725	1.77741	1.55525	2.12647	1.02172	0.982454	1.29643	2.37636	0.655162	0.439019	0.271505	0.394773	0.184461	1.74728	0.756714	0.986876	3.12488	0.864717	0.539787	1.38177	0.467227	0.793961	0.607329	0.945674	1.0053	0.541947	1.14167	0.8387	0.383161	0.805857	1.09567	0.427595	0.975898	1.44715	3.18527	1.05134	0.734946	0.448898	1.50116
Cp1752	Positive	340.056	7.3	NA	0.695551	0.527687	0.249416	0.247996	NA	1.58133	NA	1.00499	0.933019	1.3241	0.583049	0.533635	1.26313	1.2116	0.637296	0.506442	0.277583	NA	NA	NA	NA	0.72501	2.50856	0.874747	0.591687	0.784747	NA	0.343842	0.577661	0.862412	0.75037	0.566509	0.748741	NA	0.339669	NA	0.978463	NA	0.593742	1.1103	1.58554	0.995292	NA	NA	0.405141
Cp1006	Positive	340.056	7.3	NA	0.778907	0.371727	0.212695	0.191935	NA	1.60252	NA	1.17774	0.964563	1.3689	0.7314	0.554159	1.34184	2.0233	0.640934	0.506442	0.253973	NA	NA	1.19986	NA	0.893675	2.53945	0.830196	0.67175	0.825943	NA	0.42059	0.589582	0.892869	0.744249	0.616685	0.841469	0.728195	0.315121	NA	0.900013	NA	0.568001	0.987557	2.59691	0.920694	NA	0.408921	0.442781
Cp1229	Positive	340.15	7.16	0.670778	1.30198	0.14995	0.365109	0.347173	1.5849	0.796027	0.581993	0.337174	0.567946	NA	NA	NA	0.209283	0.0357473	0.111904	NA	0.0919821	0.0717124	0.902909	0.483036	NA	0.684072	0.129546	1.52361	0.236165	0.467041	0.0063298	NA	0.300481	0.0562014	2.58916	0.202278	0.212837	0.11101	NA	0.378309	NA	0.253492	1.46639	0.801274	0.61426	NA	1.90932	0.294867	0.165439
Cp1436	Positive	340.173	4.04	0.952581	0.978165	0.653885	0.429703	0.546596	0.748647	1.11351	0.360904	0.615343	0.84143	0.504384	0.551138	0.575907	1.56938	1.03302	0.38931	1.49316	0.606825	0.831012	1.16594	1.30016	1.9578	1.11392	0.954134	1.48948	1.28382	1.47805	NA	0.3752	0.632528	0.595867	1.00081	0.668042	0.457995	0.526003	0.669065	0.940419	0.691225	0.81982	1.61363	1.5678	1.25538	1.6954	1.29959	0.66159	0.44151
Cp1444	Positive	340.242	9.04	0.9948	0.868305	1.03577	0.764506	0.866701	1.21474	1.1923	0.786339	0.545652	0.80012	0.263173	NA	0.926725	0.844082	1.75846	0.479283	0.54862	0.106358	NA	0.325369	NA	0.345746	0.335418	NA	0.177815	0.522085	0.291335	0.110551	0.454389	0.357109	NA	0.321043	0.159852	0.280019	0.635624	0.675068	NA	NA	0.0881654	0.508598	0.198831	0.339575	NA	NA	0.386319	0.473428
Cp1777	Positive	341.256	6.88	0.581469	0.407031	0.4271	0.210261	0.205629	NA	0.518199	0.265576	0.413513	0.68003	0.420652	NA	0.438353	0.621709	0.410865	0.28083	0.180256	NA	NA	0.184827	0.476801	0.585425	0.397098	0.609025	0.44291	0.299196	0.676921	NA	0.357996	0.188851	0.463853	0.53489	0.210947	0.418476	0.457174	0.300445	0.462003	0.533089	0.324365	0.518357	0.492089	0.523607	0.517027	0.503862	0.230459	0.468723
Cp1632	Positive	341.991	8.64	0.334798	0.452486	0.194162	NA	NA	0.190252	0.55656	NA	0.578895	0.582196	0.716644	0.321237	0.396488	0.551571	0.98054	0.257507	0.19134	0.078775	0.199517	0.0805188	0.655026	0.32849	0.319179	1.16461	0.280987	0.201431	0.506988	0.138519	0.320049	0.177471	0.331621	0.40933	0.196104	0.384321	0.264327	0.116069	0.293801	0.361827	0.139257	0.368295	0.477611	1.05471	0.391675	0.297823	NA	0.456642
Cp1641	Positive	342.079	4.41	0.267042	0.203241	NA	0.173761	0.227133	0.275704	0.371471	0.400136	0.230561	0.687075	0.394073	0.226781	0.243846	0.82178	0.442962	0.310143	0.955775	0.370266	0.634761	0.600841	0.49686	0.773178	0.502445	0.359185	1.00124	1.10908	0.951715	0.250395	0.299794	0.258755	0.335456	0.740304	0.468129	0.410149	0.176555	0.386897	0.484469	0.388544	0.289649	0.672238	0.727437	0.598311	0.475894	0.449036	0.311459	0.253054
Cp1725	Positive	342.146	5.86	0.677716	0.606015	0.370296	0.478922	1.06067	0.36989	1.48007	0.345016	0.618311	1.00587	0.501888	0.853796	0.484567	0.997126	NA	0.686508	1.84628	0.497895	0.508377	0.986477	0.974474	0.902042	1.10382	0.550898	NA	0.56862	1.23837	NA	0.263189	0.381901	0.599153	0.886406	0.554819	0.916413	0.791214	NA	0.536617	0.924413	0.494931	0.30069	1.06493	NA	1.51985	1.01395	NA	0.156919
Cp693	Positive	342.148	10.59	NA	1.57237	0.0210331	0.0123878	0.0749979	NA	1.59877	NA	1.77907	0.969366	0.109811	4.17878	0.766064	NA	NA	NA	NA	NA	0.0631921	0.0836908	1.65227	2.93583	1.62442	NA	0.755292	0.525035	7.18912	2.94674	1.04153	NA	9.6489	0.00789004	NA	0.244029	0.417519	0.533651	1.72707	6.94545	1.87296	2.65727	13.6154	1.22525	0.231045	0.248411	NA	0.607712
Cp284	Positive	342.149	10.59	NA	1.2318	NA	NA	NA	NA	1.23544	NA	1.24719	0.782186	NA	4.20275	0.70449	NA	NA	NA	NA	NA	NA	NA	1.42688	2.39062	1.31247	NA	NA	NA	7.30335	2.16744	0.758698	NA	9.87743	NA	NA	NA	0.00543052	NA	1.65059	7.28535	1.43763	2.52489	13.8821	1.10501	NA	NA	NA	0.485
Cp1000	Positive	342.191	4.06	3.13276	2.30747	1.89369	1.19487	1.2372	1.36468	2.46054	1.27667	1.01378	1.7349	0.934021	1.52123	1.18743	1.99829	2.47569	1.13733	1.7219	1.07749	1.65933	1.5301	2.09695	2.51679	1.63533	2.03508	1.30684	1.73778	2.24844	NA	0.961489	1.13866	1.88357	1.23751	1.38048	2.55503	1.66149	1.97024	1.58913	1.77871	1.16803	1.67671	1.86733	2.26878	2.21201	2.18832	1.50138	2.68505
Cp4	Positive	342.204	11.59	75.2549	71.7663	15.6226	31.3972	76.321	64.5148	122.871	51.5137	108.895	238.312	164.263	67.5632	27.8359	59.6191	60.2253	71.2612	113.965	21.9398	67.6336	79.5174	154.554	168.337	122.368	52.1835	70.5425	89.5314	55.8573	13.1217	81.8298	50.153	28.0449	93.0165	43.8247	47.6229	44.2528	69.4457	87.8889	98.335	90.2707	56.6929	139.142	108.169	129.566	106.102	27.8785	17.9021
Cp170	Positive	342.204	11.01	5.81823	5.77644	0.659179	2.0983	4.4237	2.4851	7.46687	3.12042	6.42602	21.9059	12.354	6.4324	2.84963	3.6362	2.66903	4.13681	5.62274	1.45944	2.11985	2.74874	12.1443	12.6555	10.8394	2.64124	3.76513	5.00037	3.86959	0.53921	7.24619	2.77721	1.38532	6.99629	1.72396	3.21217	2.41039	4.63756	7.43418	5.2892	7.54528	4.48064	9.49351	5.8566	7.87825	6.05799	1.3143	1.6123
Cp1613	Positive	342.205	10.79	0.937967	0.734826	0.863787	NA	0.715636	0.361156	1.26682	0.533351	NA	0.514305	NA	NA	0.606354	0.918746	1.02405	0.670461	0.562166	NA	0.335557	NA	NA	1.17702	0.705906	0.450415	0.86654	0.611937	0.956552	NA	0.647175	NA	0.433945	0.601684	NA	0.878729	NA	NA	NA	NA	NA	0.937993	NA	0.66947	0.938541	0.804257	NA	1.04096
Cp659	Positive	342.292	8.47	0.330075	0.279319	0.46516	0.410236	0.496847	0.464344	0.338018	0.410402	3.85127	0.58764	0.926658	0.547025	0.223322	0.257604	0.434139	0.256545	0.398996	0.272674	0.396193	0.336349	0.406325	0.325324	0.259546	0.70625	0.769621	0.429952	0.244209	0.248481	0.184489	0.52469	0.764033	0.282681	0.889891	2.04101	0.389987	1.52678	0.229197	0.491393	0.475805	0.720467	0.547588	0.324307	0.292257	0.405581	0.585815	0.254707
Cp1283	Positive	343.035	6.26	0.86032	0.759681	0.283303	NA	0.515142	0.481542	1.57307	0.699687	0.242908	0.612619	0.281766	0.345631	0.165147	0.772328	0.718292	0.358071	1.48223	0.306802	1.01391	1.12861	0.952112	2.45948	1.33676	0.895877	1.19468	0.713592	1.11946	NA	0.25416	0.418479	0.371937	1.28322	0.462218	NA	0.657093	0.41438	0.815286	0.444756	0.434408	1.64078	1.17239	0.772665	1.23177	1.41506	0.471631	0.461093
Cp1604	Positive	343.206	10.79	0.981071	0.872563	0.646159	0.460672	0.487861	0.428739	1.90721	0.477376	1.06139	1.30722	1.24386	1.30778	0.745403	1.11801	1.09478	0.885817	0.946231	0.842332	0.842798	0.769199	1.62028	1.59591	1.42573	1.17765	1.26307	1.23152	1.81604	0.802117	1.10156	0.998578	1.14923	1.33845	0.370405	1.03243	1.06186	0.631576	1.1319	0.84133	0.61742	1.11351	1.0363	0.943475	1.53184	1.09842	0.478947	0.799855
Cp1614	Positive	343.95	4.24	0.323432	0.659846	0.481185	0.247535	0.201563	0.264687	0.899744	0.41028	0.518583	0.864488	0.709906	0.572128	0.512703	0.764409	0.719661	0.52122	0.3913	0.255025	0.30957	0.273032	0.982064	0.817505	0.807568	1.15132	0.618771	0.545017	0.729195	0.320464	0.43206	0.367134	0.702025	0.70888	0.376447	0.70781	0.640044	0.463076	0.438373	0.705741	0.350827	0.728105	0.980157	1.18817	0.913861	0.744016	0.335498	0.302521
Cp1289	Positive	344.056	8.34	NA	0.272453	NA	0.247978	0.691243	1.12472	0.926352	NA	0.864068	1.84282	1.87129	1.52378	NA	0.781217	1.25268	0.244456	1.26811	NA	0.492898	0.600231	1.14579	1.13428	1.22186	1.18625	1.07015	1.57953	0.5641	NA	NA	0.460611	0.386508	0.428375	NA	0.576975	0.79715	0.615833	0.34141	0.84519	NA	0.533066	0.602444	0.65134	0.468643	0.257617	0.414931	0.159717
Cp1419	Positive	344.056	6.66	0.814115	0.47487	0.686937	0.438662	0.253452	1.06681	0.579809	0.502064	0.667225	1.48383	0.898581	2.222	0.72284	0.992924	1.14741	0.293775	0.768591	0.325151	0.419624	0.758341	1.15134	2.01606	1.48031	1.11757	1.14388	0.85521	0.742303	0.295587	0.668284	0.81325	0.449173	0.863416	0.415195	0.919518	0.760147	0.681739	0.533358	0.838087	1.27401	0.699959	1.50313	0.992959	1.40551	0.779213	0.813792	0.326173
Cp1557	Positive	344.163	5.87	0.569216	0.511673	0.322507	0.40902	0.739601	0.514191	1.25029	0.346361	0.419331	0.660335	0.366121	0.430727	0.476683	0.671969	0.39322	0.422796	1.03397	0.290556	0.492188	0.577905	0.688773	0.900617	0.812754	0.46019	0.616036	0.52128	0.864174	NA	0.201815	NA	0.485545	0.787916	0.533672	0.950145	0.422065	0.270961	0.661634	0.578028	0.416853	0.297437	0.911307	0.375427	1.00422	0.819013	0.146715	0.18693
Cp1573	Positive	344.219	11.22	0.644059	0.537764	0.159823	0.178075	0.471492	0.532195	0.670869	0.507441	0.55705	0.268841	0.312838	0.260535	0.742413	1.23615	1.2545	0.974399	0.715484	0.109981	0.327463	0.384294	0.842466	0.656822	0.504901	0.39698	0.842441	1.08534	0.660068	0.167813	1.0203	0.75757	0.464073	0.78193	0.276228	0.135352	0.257508	0.300179	0.357822	0.408928	0.267116	0.192775	0.680946	0.781662	0.526927	0.608371	0.124636	0.0495936
Cp1515	Positive	345.214	2.93	1.13149	0.944109	0.920018	0.543184	0.509579	0.539047	0.315027	0.68771	0.281137	0.589562	0.283388	0.481218	0.484023	0.527006	1.16065	0.276336	0.428859	0.505376	0.409542	0.462739	0.585904	0.725053	0.654597	0.566407	0.314596	0.580556	0.782563	0.169432	0.389354	0.566552	0.475247	0.322403	0.546413	1.21069	0.494683	0.716426	0.499019	0.462824	0.376897	0.589357	0.543888	0.498524	0.548679	0.510766	0.55446	1.36993
Cp783	Positive	345.215	3.22	3.4742	2.61851	2.77465	1.48765	1.53826	1.46733	2.67224	1.73156	1.53675	2.18388	1.66464	1.89551	1.92807	3.04826	3.14196	1.45283	1.6905	1.56837	1.69752	1.49021	2.96219	3.17883	1.87373	3.2513	2.07985	2.23411	3.85289	NA	1.70591	1.56025	2.77929	2.54291	1.29615	3.15163	2.36657	2.19317	2.35076	2.53511	1.62706	2.38854	2.81644	2.50121	2.64384	2.61516	1.56278	3.43989
Cp506	Positive	345.216	10.58	4.81752	3.18978	1.18329	1.56761	0.763994	0.621947	2.80967	1.76272	1.50992	4.41595	1.56718	2.83213	1.46716	2.01009	2.17724	1.86097	1.79902	1.46026	2.40499	2.9443	4.98446	7.5548	2.93375	2.28831	3.9927	1.25096	5.11295	1.14481	1.29825	1.49103	1.46836	4.26008	1.38258	0.760032	3.24619	1.47835	4.15966	3.26664	3.51561	5.68566	5.31662	3.4654	5.30385	4.83407	1.94858	0.999628
Cp938	Positive	346.023	4.4	0.750639	1.38094	1.24653	0.925548	0.338935	0.458298	1.34665	0.963674	0.167875	1.54404	0.500515	1.88204	2.38722	3.15525	3.67436	1.32637	1.59475	2.30025	0.965916	1.91671	2.40989	2.09996	1.5087	2.35503	2.80101	1.32727	1.49553	0.793138	0.452681	0.98476	1.50101	1.5659	1.03963	1.08169	1.47609	1.27943	1.68749	2.08417	2.00737	2.74142	2.8676	1.73004	2.09084	2.85896	1.04281	1.92143
Cp1494	Positive	346.09	3.21	0.37746	0.413073	0.583346	0.409683	0.378092	0.666151	1.60109	1.0491	0.197437	0.284373	NA	NA	NA	0.996964	0.800283	0.206263	0.724412	0.23913	0.648678	0.528252	0.717777	2.01653	0.478974	0.74209	0.669445	1.09929	0.527118	NA	0.166796	0.398293	0.513591	0.474763	0.339932	0.321655	0.69839	0.247881	0.443844	0.363063	0.263448	0.716083	0.84133	1.27283	0.604175	0.814816	0.287682	NA
Cp1261	Positive	346.163	7.77	0.400046	0.729882	0.19545	0.262135	0.345461	0.669913	1.59283	0.687588	0.259885	0.45426	0.287756	0.237559	NA	0.227545	0.432466	0.183796	0.895279	0.199392	1.58122	1.38468	1.23104	2.44492	NA	1.10727	1.05061	0.656461	0.556766	0.112906	NA	0.333401	0.477657	1.04081	0.321149	NA	0.65242	0.305115	0.736714	0.64783	0.34205	1.20361	0.993348	0.75508	1.39129	1.27319	0.36633	NA
Cp570	Positive	346.307	12.52	0.0281951	NA	0.628703	0.663744	2.66269	NA	1.48084	2.75304	NA	NA	0.59685	1.36508	NA	NA	NA	NA	1.27688	NA	1.08236	0.724181	0.604879	NA	0.478291	1.95506	0.505438	0.209075	NA	1.32484	0.171799	NA	NA	0.637733	0.615371	0.928692	0.832259	1.19871	0.0591326	1.12579	0.292007	NA	NA	1.03481	NA	NA	NA	0.919388
Cp1741	Positive	347.067	9.07	0.73263	0.57443	0.441981	0.311797	0.293893	0.337509	0.784273	0.316906	0.627571	0.794035	0.692311	0.838337	0.611655	0.696372	0.774423	0.500893	0.393762	0.304231	0.435955	0.287672	0.895324	1.02695	0.874161	0.920249	0.796847	0.583238	1.02334	0.282044	0.615207	0.326492	0.682086	0.594746	0.226315	0.668291	0.68715	0.512305	0.789793	0.750216	0.564494	0.69317	0.876399	1.01545	0.976468	0.740496	0.399253	0.720633
Cp1207	Positive	347.201	5.64	0.449203	0.811865	0.484047	0.47295	0.242967	0.510295	0.436697	0.307496	0.872023	1.33156	1.16225	1.34948	1.65677	1.22419	NA	1.01516	0.387605	0.338943	0.519027	NA	1.1325	1.04563	NA	NA	0.999283	NA	1.18578	0.711439	0.504538	0.18736	0.752968	2.61405	0.346499	0.565966	0.777449	0.388231	NA	1.31604	0.601699	1.43924	1.51166	1.03481	0.517027	1.27346	0.512392	NA
Cp1016	Positive	348.063	6.09	1.02683	2.188	2.06482	1.32373	0.824869	1.57227	1.83707	0.599104	0.600621	2.33359	0.953737	0.862306	0.871812	1.64437	1.45864	1.45047	1.26318	1.11056	1.23828	2.0819	2.11945	2.53895	2.19195	1.8229	1.9686	1.3144	2.4112	0.443822	0.514299	0.82463	0.893964	2.31478	1.45246	0.73999	1.48935	1.76985	1.67608	1.31234	2.07929	2.02619	2.9202	1.48712	2.85341	3.08247	0.798114	1.03638
Cp1645	Positive	348.302	9.43	0.492455	0.49588	0.624267	0.386345	0.286404	NA	0.592725	0.324239	0.333969	0.313035	0.581127	0.49228	0.660315	0.825013	NA	0.33047	0.384373	0.461781	0.36339	0.346719	0.381116	1.09375	0.776865	0.536823	0.373608	0.588602	0.562852	0.484303	0.553954	0.426743	0.844446	0.424838	0.448952	0.403798	0.331514	0.308584	NA	0.894144	0.521263	0.866993	0.968414	0.72986	0.74626	0.533103	0.327398	0.706645
Cp1601	Positive	349.188	4.04	0.759791	0.57031	1.17671	0.45481	0.685252	0.547781	0.571026	0.460022	0.499231	NA	0.615817	0.390023	0.440935	NA	1.54246	0.352615	0.702707	0.646095	0.616727	0.613651	0.583194	0.793759	0.318906	0.703513	0.376343	0.838313	0.714527	0.308541	0.451583	0.945066	0.495624	0.593386	0.494005	0.98543	0.461468	0.664796	0.565019	0.212803	0.302356	0.513831	0.478738	0.596948	0.437967	0.587929	0.86605	0.943931
Cp1406	Positive	349.188	4.18	0.327713	0.44095	0.343111	0.149649	0.29186	0.157334	1.20005	NA	0.489971	0.571468	0.647513	0.739342	0.703675	1.00036	0.922584	0.435848	0.448409	0.422159	NA	0.318537	0.959837	1.03154	0.722827	1.23512	0.751644	0.248101	0.889765	NA	0.496485	0.495157	0.6811	0.853485	0.324301	0.627361	0.758	NA	0.738343	2.02426	0.521525	0.76516	0.781488	1.14932	1.12218	0.728583	0.313027	0.692784
Cp904	Positive	349.198	4.63	3.09423	1.24142	1.01002	0.661753	0.482511	0.63901	0.757407	0.753951	0.408171	0.850717	0.438622	1.14596	0.685733	0.598599	1.47035	0.471152	0.708095	0.626811	0.787842	0.609991	1.1424	1.12621	0.613932	0.523399	0.457891	0.825975	1.9557	0.333124	1.16538	0.49326	0.612957	0.748194	0.569925	1.33418	0.615543	0.841167	1.31733	0.575712	0.74541	1.30417	0.770388	0.751808	0.820439	0.747671	0.654143	2.94141
Cp723	Positive	349.319	11.58	0.289627	1.8749	0.35284	0.312129	0.236548	0.292902	3.976	0.356138	0.0594804	0.428481	0.509125	0.33003	3.08981	0.708816	0.911784	0.503033	0.718563	NA	1.72365	NA	0.592139	1.18969	2.88953	0.397762	0.741614	1.16058	NA	2.01891	0.411805	2.31823	1.13783	0.789821	NA	0.149466	0.503018	NA	0.91935	0.820173	1.89837	0.223325	7.81616	6.38144	2.12277	0.0951679	NA	2.52597
Cp912	Positive	350.019	3.98	1.0813	1.50645	0.620404	0.916478	0.60009	0.847266	1.54633	0.927987	0.500894	2.54319	0.805741	0.993637	1.43535	2.37322	2.50018	0.937169	2.02023	1.06042	1.36609	2.40446	2.3199	2.75251	1.7531	2.2479	3.53625	1.94833	1.136	0.675227	0.291985	0.908623	1.07057	1.64086	1.0106	1.173	1.25988	0.956302	1.27682	0.871289	1.58606	2.36549	3.74915	2.12169	3.3544	3.43972	0.771071	1.21631
Cp531	Positive	350.23	8.67	0.940033	0.469789	1.37702	0.355486	0.761854	0.555842	0.174369	NA	NA	0.491568	0.676463	0.341802	0.334915	0.509552	1.29907	1.86278	0.703631	0.370032	0.650382	0.571806	6.86239	0.502946	1.65416	0.451718	1.47632	1.81771	0.864642	NA	0.792374	0.900089	0.859783	0.743432	0.948736	4.73577	0.277335	1.43485	0.615073	NA	0.482486	0.207626	NA	0.67874	0.240805	1.70558	0.497368	0.6526
Cp455	Positive	351.061	6.09	2.00052	5.96773	4.97511	2.36519	2.29177	3.86953	4.2032	1.43971	1.27924	6.21233	3.10966	2.12768	2.09444	4.63801	3.81872	3.41724	4.44083	3.43338	2.63859	5.72318	4.84554	5.73156	5.04546	4.55433	5.64371	3.59035	5.7195	1.12847	0.714528	2.12098	1.67344	6.09479	4.56268	2.2808	3.70816	4.7663	4.11251	3.18834	5.02713	6.2548	9.0122	3.45941	6.98545	8.49323	1.64888	3.06501
Cp391	Positive	351.157	4.76	1.61849	2.44603	1.83646	1.3902	1.20863	1.31403	3.72297	2.06044	0.210853	3.33258	0.746468	3.03296	1.37215	3.39055	3.35507	1.2073	1.9939	2.03658	3.13774	3.16305	6.64039	10.5495	2.12986	3.33263	3.88614	4.31012	5.979	0.124388	1.92603	1.5929	1.98841	4.60466	2.13377	1.53446	2.51484	1.02541	3.86166	3.23483	3.51325	3.73514	3.73483	4.08226	3.55017	8.02497	0.863176	1.42384
Cp494	Positive	352.209	3.32	3.94008	2.86336	4.97682	2.46551	2.58855	2.13899	0.566635	2.37087	0.35427	0.731908	0.401935	0.720337	0.514062	1.35218	6.72323	0.978571	4.12388	3.66187	3.80473	3.71911	1.55021	1.67	1.36869	1.15914	0.357975	5.23251	0.801132	NA	0.566522	2.3441	0.789668	0.660723	1.55373	6.05273	0.785784	4.90025	0.412648	0.306233	0.381089	0.368012	0.327684	0.443996	0.796596	0.29674	4.06413	5.92935
Cp1792	Positive	352.21	3.57	4.79582	2.43642	4.05395	1.93339	2.4836	1.35205	NA	2.38823	NA	0.162362	NA	NA	NA	NA	6.67896	NA	3.27155	3.17332	3.20476	1.76995	NA	NA	0.298164	0.21439	NA	4.89617	NA	NA	NA	1.96925	NA	NA	1.64397	4.45942	NA	3.29343	NA	NA	NA	NA	NA	NA	NA	NA	2.61905	6.56021
Cp440	Positive	352.253	9.8	0.251394	0.605878	1.64659	0.496066	0.904682	1.49219	1.35724	3.30411	0.267602	0.292219	0.456341	0.215009	0.933113	0.909534	1.07729	0.292598	0.644674	NA	0.431978	0.308777	0.418929	0.516719	0.165253	0.379125	NA	0.653913	NA	NA	0.101762	0.342478	NA	0.106244	0.331657	0.257155	0.211917	0.211593	0.19579	NA	NA	0.190229	0.769905	NA	0.320284	0.267905	0.24274	0.406159
Cp816	Positive	352.257	9.15	NA	NA	NA	NA	NA	0.365859	0.636382	0.80516	NA	NA	NA	NA	NA	NA	0.46943	NA	NA	NA	0.197245	NA	NA	NA	NA	NA	NA	NA	NA	NA	NA	NA	NA	NA	NA	NA	NA	NA	NA	NA	NA	NA	NA	NA	NA	NA	NA	NA
Cp20	Positive	352.261	11.07	90.4206	67.5376	64.2049	39.3415	35.0613	42.7962	100.967	41.7164	59.7225	94.5294	67.9084	82.6073	81.5097	100.262	88.0093	56.5977	37.6599	41.1117	46.6386	37.3001	92.6594	112.268	83.2706	105.522	75.8874	46.5911	117.779	28.4794	83.2684	40.6129	87.3373	89.9696	39.9688	85.7568	82.2051	75.4653	80.9281	89.5763	65.0528	88.6961	99.5118	94.2606	103.478	86.0023	46.2735	84.1203
Cp1048	Positive	353.024	8.64	0.842458	1.26586	0.397911	0.159493	NA	0.341674	1.47671	0.280853	1.7634	1.51217	2.0939	0.778202	1.08929	1.19089	2.44314	NA	0.468112	NA	NA	NA	2.02593	0.611229	0.73429	3.21729	0.731844	NA	1.42188	0.396716	0.751377	0.405744	0.942168	0.874843	0.439757	1.14181	0.902729	NA	0.655581	NA	0.37729	0.852708	1.22628	3.39656	1.02513	0.593209	NA	1.25001
Cp1112	Positive	353.275	9.92	NA	NA	NA	NA	NA	NA	1.20883	NA	NA	NA	NA	2.38992	NA	NA	NA	0.831149	NA	NA	0.886393	NA	1.48706	2.99456	NA	NA	NA	NA	NA	NA	NA	NA	1.0388	NA	NA	NA	1.67298	NA	NA	NA	NA	1.3309	NA	1.18326	1.89061	NA	NA	NA
Cp123	Positive	354.272	11.57	13.2588	7.37792	1.14494	2.45943	0.311974	0.410735	7.18426	1.306	2.47111	2.72076	1.27793	3.1884	19.741	NA	4.93023	1.31204	0.859412	3.3373	1.46407	NA	3.02982	5.16165	10.1656	0.641216	1.85228	1.48083	6.35631	2.99414	5.48964	3.08786	1.92224	2.46972	0.00761826	0.591935	0.667449	0.943495	6.15317	0.612775	4.89429	4.0917	9.10454	7.96494	3.24983	3.82797	2.38311	11.9019
Cp1753	Positive	355.035	3.94	0.195594	0.31777	0.320218	0.291667	0.181129	0.23459	0.348867	0.31654	NA	0.370518	0.170832	0.265074	0.416469	0.548985	0.495138	0.234506	0.45472	0.383122	0.360834	0.461153	0.544703	0.738984	0.365712	0.507368	0.602358	0.559769	0.4505	0.153534	0.118234	0.267967	0.347726	0.447284	0.264275	0.355528	0.31055	0.222933	0.4414	0.481201	0.29502	0.558808	0.550323	0.464989	0.527067	0.724657	0.303098	0.330751
Cp1464	Positive	356.018	3.35	0.210799	0.533233	0.436973	0.443418	0.251098	0.45158	0.713234	0.41138	0.251931	0.659374	0.325441	1.59512	0.500741	1.33133	1.25693	0.511378	1.1682	1.29172	0.866371	0.715031	1.22521	1.37491	0.773317	1.25832	0.535921	1.60434	0.65211	0.302653	0.298574	0.537831	0.747928	1.45789	1.03543	0.363573	1.01121	0.657725	1.01806	0.794383	1.08798	1.44829	1.10129	1.33444	0.739427	1.54096	0.892963	0.824143
Cp1034	Positive	356.041	8.63	0.432522	1.14845	0.620976	NA	NA	0.480064	2.09656	0.466377	2.91727	1.57782	2.49921	0.535253	0.933929	1.73051	4.30017	0.879933	0.652063	0.246143	0.483526	0.220207	2.41843	0.946051	0.906911	5.38113	1.14805	0.536971	1.20263	0.366539	0.567376	0.785071	1.06816	1.1125	0.645056	1.29212	0.903992	0.363683	0.837518	0.820482	0.331177	0.811127	1.31524	5.77086	1.24042	0.784492	0.395595	0.715292
Cp357	Positive	356.042	8.73	1.17977	2.32285	1.19917	0.236696	0.372743	1.1219	5.73041	0.877634	5.20732	2.8021	5.59501	1.27658	1.48156	3.70326	9.87887	1.80319	1.32645	0.43373	1.18446	0.384172	4.24161	1.58229	1.59139	10.4811	2.11294	1.33398	1.99815	0.797554	0.774926	1.58897	2.40001	2.06325	1.30535	2.09252	1.52939	0.69428	1.36447	2.42423	0.419735	1.79806	2.52512	11.8932	2.38909	1.63342	0.960507	1.4419
Cp776	Positive	356.053	5.73	1.51043	1.98805	0.58864	0.305603	0.177063	0.554096	2.63878	0.50683	1.91429	2.42486	2.01179	1.66036	1.50331	1.83087	2.85765	1.06608	0.57679	0.378681	0.712864	0.304385	3.27147	1.76546	2.05672	3.31021	1.81437	0.667056	2.50217	0.489455	1.38928	0.587415	1.8793	2.12188	0.56756	1.46798	1.15796	0.509903	1.56143	1.50028	0.688554	1.82479	2.16043	4.22048	2.11357	1.27617	0.392068	1.69915
Cp889	Positive	356.108	4.76	0.955386	1.3852	1.02704	0.902874	0.75597	0.89268	1.8487	1.21422	0.217501	1.85851	0.906942	1.56633	0.716995	1.85882	1.9626	0.889134	1.21638	1.07807	1.76341	1.79179	2.70495	3.98858	1.15158	1.78863	2.03257	2.27207	2.6409	0.41497	0.979425	1.11075	1.12523	2.46414	1.24624	1.18853	1.37544	0.661194	1.72916	1.85763	1.75754	0.860063	2.02177	1.07434	1.77404	3.47207	0.571967	0.783197
Cp937	Positive	356.11	6.14	0.493931	0.666301	0.809272	0.523275	0.65016	0.770951	1.41717	0.632224	0.525707	1.48623	0.607457	0.859753	0.426391	2.0311	1.88228	0.587014	1.19422	0.742285	1.0328	1.62514	1.60917	1.59084	0.639314	1.01161	0.977528	2.77122	2.01188	0.569976	0.279417	0.842106	0.995412	0.742616	1.0923	0.485376	0.75017	0.591419	1.57947	0.489386	0.316111	1.69552	2.19405	1.35843	1.10405	0.975505	0.885124	0.494155
Cp1451	Positive	356.111	4.86	0.476217	0.762977	0.69495	0.554245	0.449773	0.610392	1.2047	0.767517	0.188889	1.36662	0.319202	0.852945	0.485246	1.50959	0.972022	0.528281	0.609732	0.655913	1.05836	1.2922	1.41604	2.91921	0.995201	1.28321	1.4276	1.67743	1.81667	0.293526	0.541143	0.592292	0.538789	1.80954	0.795845	0.299496	0.353363	0.428388	1.05659	0.908043	1.07108	1.53386	1.23963	0.64725	0.426394	2.51484	0.339025	0.364322
Cp1155	Positive	356.206	5.23	2.43939	0.876133	0.585206	0.493965	0.224994	0.219811	0.382837	0.488131	0.480236	0.756087	0.5966	1.4689	0.826414	0.613467	0.578041	0.585303	0.286163	0.303997	0.446321	0.425774	1.11285	0.935603	0.489754	0.518055	0.555461	0.256147	1.4818	0.329149	1.93091	0.298314	0.368322	1.31723	0.476272	0.762149	0.768608	0.734971	1.57877	0.706667	1.04108	1.52169	0.833447	0.719364	0.682119	0.908224	0.445894	2.1076
Cp52	Positive	356.329	12.51	33.9785	32.0842	11.7126	16.8971	10.5358	9.74786	27.48	13.1223	8.72474	16.9316	7.66621	22.1498	15.9896	12.1384	13.8751	12.5063	9.53727	28.16	36.3485	21.1634	26.4077	28.5698	24.0185	14.6403	16.4859	4.11177	18.2817	3.04051	8.47623	8.80336	5.44365	19.9147	8.01598	8.31885	12.2808	21.0628	42.2407	16.8369	43.9715	33.5983	19.4662	14.5982	19.0411	27.4043	13.4901	24.8045
Cp509	Positive	357.269	11.42	1.73673	1.64076	1.27114	1.48687	0.706863	1.72893	2.83395	0.640779	2.09202	4.29025	3.11028	2.31064	2.07351	2.91187	1.00975	2.0254	0.59403	1.23586	0.987359	0.773713	2.42805	3.75397	2.49394	1.9819	2.65446	1.43322	2.97733	1.99771	5.8142	1.22577	4.0121	4.59255	0.862702	2.32004	2.34889	1.7337	2.05404	2.44477	4.80115	2.90068	7.1431	2.48103	2.56701	2.74836	1.59349	0.6114
Cp962	Positive	357.274	11.29	0.775439	0.516616	0.66991	0.246872	0.562965	0.0976788	NA	0.199212	0.340973	0.0456342	0.0250819	0.0199975	0.216526	NA	0.26529	0.654841	0.500439	0.340579	0.182334	0.214351	2.67635	0.0512919	1.12102	0.0735052	0.639223	1.24533	0.742303	NA	0.64266	0.456412	0.203552	0.363758	0.437524	2.65242	NA	0.849172	0.587369	NA	0.157073	0.0977312	0.303876	0.312719	NA	1.12184	0.18617	0.426377
Cp1212	Positive	358.044	8.73	0.496588	0.872975	0.613822	0.303502	0.272817	0.496187	1.49002	0.393292	1.48891	0.988581	1.15888	0.357261	0.375148	0.820488	2.03759	0.492656	0.395456	0.121435	0.175518	0.068929	0.702597	0.482841	0.411835	2.2681	0.720901	0.574655	0.771796	0.136459	0.272463	0.272303	0.648781	0.458439	0.399302	0.807736	0.665681	0.349141	0.567813	0.836697	0.44253	0.71382	0.564479	2.59622	0.611983	0.457429	0.345296	0.406794
Cp1366	Positive	358.052	5.73	1.33801	1.14241	0.28502	0.345421	0.618385	0.763561	1.88151	0.991906	0.698924	1.48912	0.817471	0.700056	0.468799	0.825013	0.858543	0.41167	1.25025	0.334852	0.998861	1.10701	1.80176	2.1989	1.41577	1.78003	1.42865	0.98838	1.2961	0.1606	0.728438	0.430807	0.911931	1.85158	0.481132	0.643592	0.632593	0.478818	1.07929	0.865884	0.701917	1.48096	1.5226	1.81252	1.82117	0.959802	0.530944	0.655016
Cp1735	Positive	358.067	8.01	0.222313	0.321478	0.218916	NA	0.0371245	NA	0.387874	NA	0.0514072	NA	0.233848	0.218555	0.270759	0.303824	0.37451	0.0576637	NA	0.0222066	NA	0.0509952	0.297493	0.964098	0.4903	0.149747	0.220673	0.159723	0.364676	0.0697749	0.323587	0.0111089	0.272243	0.268806	0.035727	0.101196	0.290343	0.145954	0.277388	0.242145	0.334976	0.480453	0.305485	0.235835	0.661762	0.43076	0.190612	0.22457
Cp1484	Positive	358.161	4.42	0.502345	0.623043	0.527973	0.645163	0.28052	0.832353	1.44223	0.609736	0.67601	1.32499	0.776416	1.101	0.813093	1.79127	1.49378	0.605415	1.18914	0.435951	0.677931	0.643906	1.58247	1.47607	0.944983	0.975769	1.02208	1.32848	1.28674	0.426746	0.352261	0.64621	0.781671	0.945581	0.682228	0.490739	0.592937	0.304581	1.02888	0.541737	0.585979	0.905888	1.64276	1.33635	1.33384	1.44552	1.05	0.961861
Cp950	Positive	358.182	12	1.67414	1.37751	1.24453	0.803329	0.952291	0.862315	2.37788	0.989706	2.47776	1.68686	1.7893	1.41628	1.75273	2.37807	2.4013	1.21254	0.728107	0.567203	NA	0.570464	2.10278	2.09664	1.55155	3.10312	1.75718	1.18673	1.95758	0.412025	1.20882	0.881664	1.35639	1.61338	0.706134	1.44568	1.42507	0.991123	1.41872	1.6056	1.01986	1.33387	1.82068	3.10402	1.61341	1.269	0.933594	1.65414
Cp356	Positive	358.184	12.1	3.01806	3.23908	2.34998	0.900551	1.11074	1.62655	4.66469	1.24489	5.9237	3.61487	4.41841	2.55018	2.75122	4.58646	6.83823	2.42252	1.32522	1.17835	1.78912	0.975254	4.96643	3.81745	3.0103	8.67218	3.36559	1.1827	4.16997	0.968753	1.15659	1.8904	3.08253	3.04746	1.58617	4.27946	2.86201	1.65779	3.20317	3.57704	1.63623	2.62771	3.68802	6.86728	3.44643	3.57401	2.46071	3.03068
Cp511	Positive	358.199	8.22	1.00292	2.51703	0.156675	0.482794	2.12401	2.70827	5.7175	2.70024	1.6892	2.33151	0.748215	0.997041	0.362507	0.634476	1.7215	1.0434	3.98673	0.630434	2.65875	2.06262	4.55807	4.56435	1.99681	2.40977	2.62763	2.37842	3.98225	0.282044	0.717456	1.30096	1.37129	2.95169	1.14064	0.573164	1.51916	0.337668	2.33504	1.70088	1.14825	2.70493	3.23293	5.50394	3.82165	3.15882	0.986897	0.546419
Cp769	Positive	358.2	10.06	1.10788	0.880253	0.400201	0.579905	1.70302	1.49783	3.84697	1.00352	1.67388	3.2522	1.58054	0.837202	0.663306	1.57181	1.33482	0.882287	2.13768	0.629733	1.50752	1.37065	2.80294	3.00691	2.12932	1.2492	1.94776	2.43769	2.50077	0.539799	1.69066	2.15783	1.15416	2.0257	0.859287	1.67362	0.497714	1.02207	1.58354	1.36994	1.12283	1.7808	3.43578	2.47531	2.87279	1.69908	0.872582	0.894337
Cp1446	Positive	359.125	1.33	0.316346	0.470063	1.24667	0.401277	0.470208	0.572234	1.24642	0.576371	0.372791	0.890908	0.4078	1.13929	0.840821	1.8501	1.83863	0.446653	1.10201	1.15217	0.770944	0.805066	1.6154	1.5109	0.888626	1.51246	1.03563	1.48659	1.09668	NA	0.33103	0.404931	0.80895	1.00952	1.15968	0.488057	1.13826	0.564736	1.25797	1.03668	0.932221	0.763463	1.55702	1.19294	1.10238	1.28835	1.02243	0.544639
Cp881	Positive	359.159	3.38	1.63576	1.10203	0.81614	1.30658	1.58319	0.763158	1.61169	0.966974	0.548977	0.660975	0.633162	0.616662	1.2702	1.21821	1.57242	0.687792	1.1405	0.536932	0.820645	0.903641	2.20117	1.96872	0.993017	0.58752	0.991206	3.45651	2.17838	0.639898	1.07923	1.02432	0.713966	1.1797	1.34751	1.71159	0.810916	0.914144	1.78969	0.659412	0.983836	1.77316	0.734032	0.880085	0.959038	0.737112	0.468103	0.460966
Cp1745	Positive	359.284	12.04	0.610402	0.418154	0.391616	0.409794	0.200601	0.300695	0.387874	0.398914	NA	0.465469	NA	0.331307	NA	NA	NA	0.236218	0.21366	0.369331	0.331723	NA	0.387079	0.66537	0.507494	0.334292	0.407607	NA	0.523529	0.279836	0.736613	0.268509	0.354299	0.415588	0.392734	0.625244	NA	0.529782	0.265864	0.383756	0.566066	0.545937	0.664699	0.281502	NA	0.475975	NA	0.343213
Cp1193	Positive	360.062	2.96	0.255084	0.19198	0.782945	0.725683	0.598806	0.631083	1.57823	0.407591	1.1122	2.40804	0.535206	0.52022	0.181594	1.46369	2.1246	1.44159	2.34333	0.364773	0.451717	1.01454	1.34366	1.84224	1.55264	1.73832	0.555852	2.35575	1.10214	0.223898	0.218043	0.469146	0.842035	0.572028	0.866774	0.821709	1.53393	0.857844	0.383198	1.0322	1.00624	0.750168	1.57343	1.83651	0.913582	0.864228	0.881597	0.284209
Cp1407	Positive	360.063	3.23	0.230285	NA	0.448276	0.479697	0.422599	0.516878	0.933714	0.40698	0.720888	1.41514	0.367993	0.340526	0.176293	0.896767	1.27777	0.685546	1.20576	0.14294	0.254756	0.544356	0.817664	1.11813	1.13657	1.00105	0.415163	1.57484	0.777257	0.226106	NA	0.284495	0.567492	0.28513	0.477323	0.605344	0.945037	0.494428	0.216393	0.669605	0.688161	0.495021	0.856773	0.558233	0.529855	0.547994	0.48561	0.20664
Cp561	Positive	360.087	6.63	0.737353	1.60766	1.59894	1.1347	1.39393	0.194148	0.949084	0.449022	0.461003	2.2396	0.888848	0.281242	NA	1.88549	1.21313	4.70007	0.695627	0.724987	0.799913	1.31111	0.695956	2.75124	0.800473	1.96157	2.90484	0.76871	1.24851	NA	0.33945	0.810134	0.283636	3.13099	1.83968	0.168943	2.22045	0.859178	1.98234	0.497725	4.92757	1.21492	5.94786	1.13855	3.09073	5.97879	0.203938	0.5482
Cp330	Positive	360.179	10.29	8.6181	2.64117	0.396051	0.789171	0.275598	NA	1.56519	0.675733	0.522026	3.22386	0.563407	2.67272	1.03709	0.471251	0.236084	0.40493	0.382217	0.704884	0.5497	0.553506	7.17262	10.2604	1.52794	0.977463	1.32417	NA	9.73577	0.202112	1.02518	0.267019	0.61219	7.07873	0.284765	0.215236	1.27504	0.655457	8.21955	1.03437	3.49268	10.637	3.22697	0.759578	2.78997	3.42943	0.296696	2.2003
Cp1456	Positive	360.183	12.1	NA	0.649959	NA	NA	0.363649	0.314937	1.0333	0.519174	1.29729	1.3639	1.35205	1.18085	1.07148	1.79079	2.26333	0.682015	2.16846	0.722299	1.15592	1.37382	1.34922	1.25349	1.16004	1.94359	1.17606	NA	0.720769	0.363006	NA	0.384204	0.555112	0.490951	NA	0.791082	0.443282	1.17603	0.539294	0.891674	0.620826	0.729519	1.10338	1.51929	0.990411	0.85245	0.935945	0.685663
Cp201	Positive	360.215	11.25	6.84285	8.20777	1.17055	2.07363	6.91746	6.23156	11.943	6.40229	5.24769	17.8868	10.0285	4.80409	2.35474	5.90341	4.10759	5.52983	11.225	2.57258	7.80359	10.2271	11.3867	19.2986	11.5901	6.75323	6.37217	5.92344	7.01934	1.00982	6.58681	3.74856	3.34634	8.80746	3.43255	3.89783	6.13358	6.66944	9.96443	11.4884	8.27916	8.86836	14.3959	10.0969	14.2577	12.1183	1.78266	2.92144
Cp48	Positive	360.215	10.77	30.7389	20.5008	1.5925	5.1133	16.9119	12.4512	28.2413	13.7736	20.547	45.5756	22.3345	13.1807	8.91072	10.8578	9.53722	13.8415	57.7433	14.9048	39.6913	40.6902	36.4485	52.2915	47.9861	14.226	14.5037	19.4647	17.2264	2.27961	25.1227	9.31085	5.11181	19.7205	8.90785	8.11434	12.8357	19.2074	34.6244	27.5383	24.3232	29.3885	50.0253	35.1635	39.3075	39.3172	5.12262	16.3374
Cp1811	Positive	360.223	10.57	NA	0.00741555	0.112463	0.100319	NA	NA	NA	NA	NA	NA	NA	NA	0.0252817	NA	NA	NA	NA	0.0165965	0.0146265	NA	NA	NA	NA	0.0294542	NA	NA	NA	NA	NA	NA	NA	NA	NA	0.0141139	0.0231113	0.0525646	NA	NA	NA	NA	0.0437556	0.0201754	NA	NA	2.50539	0.167474
Cp890	Positive	361.29	9.2	0.78341	2.35663	2.92245	0.770036	1.31391	1.67236	1.36589	2.62508	0.949074	1.2547	1.27381	NA	NA	1.7861	4.87045	0.98606	1.66679	0.749181	2.30033	1.61721	NA	0.603314	NA	1.11105	0.469354	2.69008	NA	0.537297	NA	1.78853	0.794489	NA	1.85229	3.22163	1.30522	2.8581	NA	1.60622	NA	NA	0.201404	0.767485	0.881233	0.941662	1.98255	0.930579
Cp542	Positive	362.084	2.77	1.15748	3.07045	1.92073	2.50179	2.14958	3.72563	4.55039	1.90999	1.16361	1.78262	1.23176	2.05039	0.994279	4.37119	4.32968	1.4616	6.57128	1.32351	2.23828	2.15961	3.74393	4.67754	3.47727	3.73665	3.23038	6.59962	3.40052	0.804326	1.6654	2.3628	2.9721	3.2745	1.69467	1.93176	2.1765	1.37042	2.0211	2.28107	1.54165	2.88074	3.73161	2.48581	2.65778	2.32762	1.47551	0.862419
Cp1740	Positive	362.142	9.94	0.104219	0.393299	0.715267	0.256937	0.529478	0.605958	0.958125	0.476765	0.455541	0.321521	0.393574	NA	0.236914	0.863476	0.603749	0.381607	0.507827	0.34841	0.655494	0.642686	0.287057	0.670595	0.417567	0.59925	0.711261	0.912877	0.222207	NA	0.0788226	0.516697	0.601563	0.383619	0.358452	0.597158	0.663029	0.590218	0.204869	0.678716	0.21406	0.203524	0.803204	0.505204	0.632898	0.636529	0.561515	0.0750262
Cp335	Positive	362.303	11.44	2.12393	1.26339	0.429246	0.371414	3.39705	1.66215	NA	2.31209	0.3627	0.981375	0.432133	0.0934637	1.90184	NA	0.554007	1.58356	NA	NA	1.26469	0.539964	NA	2.336	NA	0.85326	0.28255	NA	NA	0.367423	NA	NA	0.444134	0.576109	NA	0.621857	0.86118	1.11293	NA	NA	NA	4.39253	0.431604	NA	NA	NA	0.680925	NA
Cp711	Positive	363.225	9.65	4.10113	1.63733	0.492918	0.300184	0.242967	0.132209	1.20922	0.639068	0.676248	1.87244	0.587116	1.36919	0.599014	0.345035	0.369034	0.277192	0.611887	0.439691	0.698521	0.734673	3.73729	5.02756	1.417	1.35151	1.33876	0.206661	4.03234	0.411289	0.499169	0.221364	0.612847	3.29518	0.209371	NA	0.995553	0.490559	2.8521	1.00394	1.78401	4.13512	2.43004	0.952472	2.323	2.35862	0.50377	0.735256
Cp1710	Positive	363.24	6.31	0.319151	0.186899	0.176277	0.124653	0.134911	NA	0.479063	0.165847	0.573908	0.637918	0.750461	0.577943	0.548858	0.447495	0.267572	0.541654	NA	0.170874	0.130928	NA	0.970544	0.908216	0.789283	0.528742	0.505569	NA	1.09122	0.271151	0.944407	0.101064	0.74979	0.715001	NA	0.264776	0.434694	0.211192	0.96789	0.417576	0.705454	0.620897	1.39841	0.810426	0.81542	0.70936	NA	NA
Cp1569	Positive	364.273	12.65	0.637268	0.5298	0.824582	0.626249	0.36857	1.04827	0.723308	0.390603	0.610357	1.64059	0.476182	0.549294	0.324041	0.588741	1.06299	0.64532	0.304327	0.521037	0.552256	0.412964	0.966749	1.02077	0.659783	0.59547	0.53058	0.310998	1.28034	0.453979	0.334935	0.455463	0.93921	0.75105	0.269529	0.71402	0.648884	0.460941	0.732756	0.629453	0.403753	0.732206	0.707972	0.670152	0.818208	0.94288	0.349608	0.578337
Cp329	Positive	365.973	5.43	10.5568	11.4624	11.3965	9.01779	8.55981	10.2873	9.00519	9.14067	9.40099	11.9619	9.77608	11.3056	10.8266	11.4513	10.4569	8.45635	11.5004	9.94307	11.1917	9.61102	10.3751	11.6585	10.8304	10.4993	10.6479	10.3619	11.5462	12.3424	10.2622	10.5977	8.25854	11.0201	11.3919	12.3718	9.89378	11.7774	8.51487	12.0887	10.7136	11.8062	13.5496	10.3819	10.42	10.5979	10.596	10.6287
Cp1593	Positive	366.024	7.48	0.991109	0.695688	0.568894	0.833524	0.777688	0.704309	1.03885	0.839869	0.607745	1.71953	1.67575	1.00243	1.12612	2.55617	1.15912	0.722562	2.63119	0.618629	1.118	1.40457	1.52148	2.56064	1.0577	1.63497	1.6884	2.23519	1.97037	0.597209	0.648151	1.2129	0.607698	1.46632	0.726624	1.59741	0.41032	0.973646	1.43664	1.22632	1.01554	1.49482	1.8432	1.19417	0.396834	0.87763	1.17934	0.93859
Cp1372	Positive	366.026	6.66	0.31177	0.637462	1.53427	0.487439	0.45309	0.40012	0.575805	NA	0.264753	0.770978	0.256185	0.20962	0.506314	1.11268	0.179345	0.89459	0.752736	0.346423	0.291252	1.17521	0.678066	0.256301	1.24519	0.548552	1.66782	0.519671	1.01398	NA	0.212308	0.288153	0.677923	0.610254	0.185728	0.165414	NA	0.304982	1.14017	0.417885	0.858335	0.765585	2.52592	0.286001	1.94206	1.38461	0.319037	0.246315
Cp1589	Positive	366.132	12.21	0.134776	1.22164	1.22836	0.623373	0.511826	1.14097	1.27638	0.80406	1.29112	1.62137	1.12045	NA	0.988706	1.49714	1.91392	0.864207	1.34415	0.754206	1.52016	1.13727	0.762638	1.12067	0.640951	0.933673	0.870318	0.933932	0.562228	1.45276	0.768825	1.10845	0.950166	1.10148	1.43722	1.16679	1.19497	0.94016	0.349092	1.39511	1.16999	0.378196	0.744649	1.30227	1.23233	0.903892	1.21866	0.289677
Cp552	Positive	366.154	9.51	0.347494	0.472535	0.828445	0.302506	0.519529	0.779147	0.752757	1.21715	NA	NA	NA	0.133459	0.210953	0.674878	0.532406	NA	0.948848	NA	0.242402	0.26986	0.309419	0.710013	NA	0.44859	0.313424	0.510015	NA	0.0911196	0.182781	0.341394	0.266546	0.234661	0.195842	0.163015	0.277588	0.17437	NA	NA	0.141091	0.186552	0.68899	0.509566	0.414542	0.241507	NA	0.237286
Cp1654	Positive	367.974	5.43	1.1836	1.16836	1.24224	1.01735	0.919018	1.09811	0.867712	1.01892	1.0412	1.25166	1.01301	1.27488	1.20333	1.33343	1.11897	0.897371	1.3303	0.997661	1.19383	1.02161	1.07517	1.1737	1.19662	1.17413	1.2507	1.00206	1.3604	1.39211	1.16501	0.988553	0.856277	1.20037	1.19147	1.48224	1.02182	1.30451	0.959276	1.34492	1.09427	1.22482	1.45343	1.19226	1.13752	1.02925	1.22938	1.08635
Cp706	Positive	368.074	4.72	1.39189	1.09146	1.40607	1.02266	1.07607	1.46975	3.75307	2.28263	0.509798	1.61561	0.558541	0.729414	0.514606	2.63988	2.76075	0.692713	2.12028	1.08462	2.3276	2.1396	1.93811	5.36824	1.40253	1.68267	2.43718	2.78409	2.08663	0.419533	0.708671	1.12552	1.53924	1.94748	1.27435	0.594617	1.47975	1.02821	2.90134	1.11035	1.12191	2.77721	2.87934	2.88045	1.87039	3.43579	0.657017	1.22928
Cp1154	Positive	368.096	9.02	0.788134	1.13348	1.06882	0.379156	0.593671	0.944542	2.50303	0.840114	1.68765	1.64459	1.53249	0.929957	0.968725	2.08491	2.59905	1.12129	1.05953	0.568022	0.929989	0.666598	1.81152	1.38979	1.18188	2.42997	1.4431	1.41511	1.25366	0.388473	0.746862	0.915397	1.4321	1.11209	0.782579	1.45316	1.31027	0.745644	0.992916	1.5375	0.680432	1.06571	1.84513	2.73241	1.43521	1.24923	0.932549	0.760053
Cp751	Positive	368.097	9.17	0.708568	1.43985	1.41537	0.498389	0.736605	1.13614	3.18346	0.959397	2.02483	1.83049	2.11587	0.919745	1.15766	2.76206	3.2705	1.40447	1.20299	0.693547	1.21073	0.833126	2.46804	1.76229	1.51839	3.62287	1.80929	1.83273	1.43654	0.641812	0.735149	1.34322	1.92093	1.63705	1.00114	1.83607	1.69647	1.05916	1.00258	1.88064	0.640345	1.14166	2.26773	3.71215	1.80388	1.57399	1.32527	0.810028
Cp527	Positive	368.11	4.94	1.94664	3.15325	3.32752	1.93261	1.86307	2.69309	4.5035	2.89139	0.889475	2.95437	1.20892	3.92491	3.1628	6.94546	6.86621	1.75634	4.69406	2.96575	3.51192	3.71338	6.14596	7.72149	3.24774	3.99378	5.45756	5.03055	3.25696	1.13362	1.23761	2.67927	3.24183	4.63853	2.51284	2.78495	3.09792	1.73583	3.42562	4.30409	3.0119	4.18505	6.12562	4.47077	4.46989	5.21867	2.13697	1.55775
Cp988	Positive	368.128	5.85	1.06329	0.730294	1.8977	0.766386	1.46037	0.765711	3.74661	0.975774	2.41744	2.09949	1.91034	3.6587	0.380177	1.97583	2.65443	1.39131	2.53744	1.3643	0.962082	1.94209	2.77366	3.01847	2.68143	0.834102	2.35954	2.8022	2.27497	0.201817	0.641074	1.19149	1.57484	1.64535	0.76419	2.25582	2.30254	2.27389	0.909455	1.01429	0.492573	0.68426	0.567857	1.50362	3.12378	1.26981	1.55155	1.54541
Cp1365	Positive	369.105	1.79	1.10271	1.13911	0.846617	NA	0.541996	1.38685	1.60884	0.876412	0.395111	1.08449	0.40156	0.615102	0.502644	1.8606	2.16583	0.47051	1.4439	0.714001	1.11573	1.01015	1.01947	1.63042	0.6067	1.45134	1.14271	2.05427	1.43701	0.23803	0.612522	0.534715	0.800624	1.32049	0.846021	0.686498	0.750675	0.357012	1.31198	0.93723	0.895147	0.902069	1.39165	1.60967	0.729109	1.36606	0.59692	0.58762
Cp1271	Positive	369.165	4.61	0.64893	0.71203	NA	0.247314	0.385474	0.675287	1.11635	0.714842	NA	0.687875	0.23597	0.792385	0.63082	NA	1.27078	0.403325	1.48207	0.883472	0.935385	0.977328	1.63926	2.34866	0.902408	1.45225	0.887904	1.4355	1.05861	0.173113	NA	NA	0.801829	1.11304	0.555739	NA	0.96537	NA	1.06369	0.820945	0.666153	1.00645	1.35642	1.2855	1.57088	1.38054	0.651399	NA
Cp1281	Positive	369.233	5	0.533788	1.13719	0.677065	0.496398	0.277845	1.12902	1.12617	0.362004	0.276507	0.700845	0.179442	0.4581	0.331109	0.877051	0.766665	0.637938	0.647907	0.405329	0.393637	0.752607	0.683758	1.40562	0.486069	0.647993	0.677652	0.653109	0.787244	0.132631	0.320293	0.343155	0.421785	1.26934	0.475222	0.329276	0.328104	0.338068	0.7061	0.334957	0.780781	1.05355	0.803044	0.513247	0.85976	2.07176	0.314333	0.196594
Cp1388	Positive	370	6.31	NA	0.478715	0.321219	0.273085	0.54114	NA	0.208855	0.369093	0.188889	0.639039	0.439869	0.752248	0.94888	1.02072	0.80941	NA	0.870803	0.307152	0.451149	0.320489	1.69496	0.43424	0.424663	0.53982	1.43881	0.952439	0.669274	NA	NA	0.261329	0.553469	0.642222	0.459985	NA	0.567805	0.595288	0.508448	0.576484	0.681611	0.65767	1.59467	0.591495	0.285704	1.16516	NA	NA
Cp304	Positive	370.094	12.25	5.3829	5.54971	2.79125	2.26963	1.90073	0.542675	1.71721	4.16354	2.65537	7.41436	1.58078	2.00302	3.98011	4.00046	3.88672	0.870733	3.67979	1.90147	2.08662	1.81973	4.13128	3.76568	3.09914	5.15514	1.49691	0.175682	3.81997	2.26783	6.25651	2.49448	0.298755	1.81689	2.46188	4.529	0.692202	2.20051	1.65536	1.45132	1.27611	2.45629	5.63401	2.32904	0.430717	0.900779	1.75144	10.7982
Cp984	Positive	370.096	11.44	1.72891	1.54504	0.497067	0.243996	0.0473952	0.0849147	0.288936	0.454277	0.690613	0.892829	0.328311	0.317266	0.750025	0.516986	0.868583	0.0837675	0.28293	0.275362	0.158193	0.220817	0.795979	0.403528	0.513088	0.973032	0.242689	0.0891822	0.814396	0.154123	1.34279	0.319176	0.154691	0.374641	0.337962	1.20645	0.1883	0.34754	0.383547	0.327235	0.328688	0.603642	1.10483	0.718546	0.140133	0.16096	0.143057	2.96175
Cp1828	Positive	370.166	11.59	NA	0.479401	NA	0.139584	0.566603	NA	NA	NA	NA	2.4335	1.39261	0.395129	NA	0.209607	0.252969	0.456709	1.0115	NA	0.441067	NA	NA	1.41575	NA	NA	NA	0.532143	0.234847	NA	0.552124	0.212017	0.0556536	0.586448	0.196236	0.193642	0.194362	NA	0.600057	0.578646	NA	NA	NA	NA	1.09108	NA	NA	NA
Cp582	Positive	370.219	4.29	1.62498	1.73675	1.3175	1.0492	1.09587	1.57146	1.95707	1.72667	4.70227	1.68927	1.23401	1.39274	1.2051	2.0332	2.32935	0.85843	2.17647	0.9917	1.57199	1.68077	3.47883	2.76153	1.76565	1.48548	2.09145	2.22634	2.06728	0.789899	1.05154	1.14923	1.54866	1.76478	1.37759	1.09891	1.44275	1.57107	1.34678	1.54197	1.15244	3.61139	2.69612	1.98387	2.90737	2.29635	2.33751	1.16558
Cp1540	Positive	370.315	9.16	NA	0.037627	NA	0.0895905	0.0757468	0.0440697	0.0244117	0.0362982	0.790578	0.0497973	0.143004	NA	NA	NA	0.0880752	NA	NA	0.00899952	0.0325191	0.0990625	0.0115202	NA	NA	0.0473092	0.251807	0.0482791	NA	NA	NA	0.0533767	0.220533	NA	0.131481	0.782332	NA	0.363149	NA	0.03382	0.0569865	0.172974	0.0961979	0.0725225	0.0323491	0.0106945	0.131952	NA
Cp1691	Positive	370.957	1.94	NA	NA	0.5998	0.311576	NA	0.462597	0.703934	0.400502	NA	0.498774	NA	0.947827	0.67051	1.01135	1.33299	0.275481	0.959469	0.803529	0.525986	0.527154	1.15039	1.13032	0.669062	0.848438	0.804012	1.1355	NA	NA	NA	0.414008	0.784629	0.757988	0.538269	0.450656	0.602788	0.280167	NA	NA	0.678074	0.830503	0.8172	0.59463	0.782095	1.00028	0.583464	NA
Cp1651	Positive	371.246	11.19	0.751377	0.590222	0.863644	0.370308	0.369105	0.509354	0.902456	0.298696	0.588868	0.590683	0.75982	1.04867	1.02309	1.22661	0.596143	0.668749	0.607115	0.401472	0.561061	0.527642	0.970544	1.15534	0.950442	1.18912	1.01882	0.47166	1.38708	0.629741	0.944041	0.42891	1.01875	0.956328	0.447638	0.910344	1.11894	0.763388	0.96207	1.04718	0.967723	1.08155	0.813017	0.613715	0.999335	0.844192	0.557726	0.625515
Cp1262	Positive	371.341	10.53	1.04647	1.51387	1.8718	1.04091	0.707612	1.04652	1.36679	1.03383	0.86015	0.665299	0.829575	1.54931	0.782918	1.17215	1.61821	0.7829	1.52902	0.920055	1.02953	0.56595	0.886243	0.904258	1.0693	0.982937	0.549208	0.736927	1.02911	0.832883	0.966858	1.09598	0.5458	1.16065	0.649916	2.34982	0.611376	1.30971	0.774195	1.3284	0.759951	0.619766	1.22564	0.534104	0.647957	0.619742	0.655841	1.68542
Cp1269	Positive	371.963	7.3	0.304832	0.754188	0.448419	NA	0.236334	0.357663	1.28168	0.370315	0.968307	0.887705	1.16575	0.420232	0.530509	1.14209	1.5274	0.592364	0.402845	0.256311	0.352882	0.269006	0.967291	0.606638	0.697036	1.87934	0.775353	0.60778	0.642591	0.365214	0.32615	0.524419	0.797447	0.67147	0.461955	0.682123	0.649389	0.393301	0.437558	0.786816	0.205151	0.58667	0.926911	2.00037	0.819742	0.612026	0.409313	0.364068
Cp1270	Positive	372.05	5.18	0.623687	0.567152	0.238947	0.279611	0.795876	0.853716	0.801193	0.527852	0.373385	0.537843	0.659492	0.303367	0.131574	0.885293	0.673722	0.258363	1.31937	0.180925	0.493182	0.66489	0.349943	0.798983	0.664286	0.808818	0.840487	1.84372	0.401346	NA	0.201449	0.568042	0.378072	0.738671	0.599609	0.282983	0.445808	0.506034	0.353399	0.442903	0.359605	0.619624	0.823474	0.657747	0.636105	0.925011	0.372863	NA
Cp1028	Positive	372.093	12.25	1.12249	1.42928	0.587209	0.432026	0.382478	0.118639	0.411511	0.999239	0.560968	1.46606	0.484543	0.372295	0.842724	0.915352	0.857478	0.271629	0.66407	0.336839	0.442629	0.614017	0.891258	0.827637	0.750801	1.28582	0.214942	0.0388915	0.798791	0.530672	1.2259	0.548805	0.0323186	0.356684	0.613532	1.04781	0.191079	0.517375	0.377029	0.441822	0.338513	0.529106	1.45632	0.5187	0.105971	0.167187	0.374169	2.36625
Cp522	Positive	372.106	4.66	2.383	3.65586	1.9266	2.13779	2.59818	3.38853	5.61455	2.5212	2.59185	5.6532	2.97177	2.96871	3.05596	5.74115	4.80322	1.86054	5.03256	1.7687	3.61672	3.49098	6.21631	7.56857	3.93236	4.64334	5.24132	5.80583	3.95557	0.822284	1.46896	2.62156	2.50891	4.04215	2.18053	2.3669	2.86605	2.56673	3.4056	3.66939	3.19924	4.52887	6.63701	4.42851	5.04562	4.71088	2.12952	1.42155
Cp117	Positive	372.142	3.65	8.27179	11.6343	3.63014	7.9771	4.58354	9.47794	8.26897	10.9591	1.0729	2.68313	2.42309	2.18186	2.89802	10.609	6.88812	2.78508	8.90368	2.48352	6.04812	3.31994	8.09722	29.8654	2.89158	4.80781	3.5111	8.33123	8.49662	2.26091	4.46055	5.25544	6.52977	14.6393	2.35338	5.99317	3.57758	5.39241	7.81401	3.76066	4.32757	12.5116	4.65643	3.94225	4.88917	9.35299	3.32676	2.06411
Cp1686	Positive	372.322	11.16	0.941362	1.05726	0.914438	0.646269	0.352201	0.273554	0.792927	0.367015	0.237803	NA	0.397318	0.810255	NA	0.485149	1.00397	0.400436	NA	0.567671	0.350042	0.320733	0.409848	0.467485	0.330096	NA	0.358236	0.431695	0.676452	NA	0.671822	0.465082	0.265122	0.720987	0.359372	1.2049	0.293122	0.718161	0.623686	0.488305	0.593446	0.565313	NA	0.279866	NA	0.378235	0.422116	0.927781
Cp1378	Positive	373.137	5.43	0.512236	0.561934	0.174989	0.328499	0.327594	0.352692	1.16517	0.487398	0.208478	0.555616	0.249322	0.249047	NA	0.525713	0.498789	0.258363	0.616043	0.174614	0.65166	0.736503	0.843551	1.96635	0.757624	0.375997	0.782908	0.409165	0.624802	NA	0.233661	NA	0.251975	0.989656	0.344792	0.127025	0.500997	0.319257	0.650692	0.343914	0.481831	1.19837	0.728723	0.694281	0.879281	1.27847	0.176764	0.288151
Cp765	Positive	373.195	1.87	2.29517	1.45661	0.959795	0.486554	1.04344	0.800913	4.05634	1.28779	0.732404	1.48047	0.295742	0.54433	0.245749	1.09054	0.724529	0.529672	1.43389	0.310542	1.31113	1.39249	1.35735	4.23253	0.841683	1.09854	1.77229	0.618643	1.72694	0.127185	0.446458	0.452483	0.45005	2.43843	0.711519	0.300908	1.65189	0.42572	2.17836	0.80751	1.08222	2.18347	1.89661	1.62331	2.37306	2.78627	0.555244	0.312567
Cp461	Positive	374.052	8.63	0.563016	1.24183	0.637288	0.177522	NA	0.511907	2.30425	0.495831	3.14664	1.80615	2.68052	0.75239	0.988434	1.8139	4.68563	0.946904	0.681311	0.230715	0.48665	0.211179	2.54597	0.905841	0.998476	5.62888	1.25461	0.419223	1.40206	0.451182	0.61423	0.788729	1.15251	1.17031	0.612219	1.37921	0.946174	0.385429	0.890133	1.30848	0.22061	0.959208	1.40372	6.28315	1.28016	0.792479	0.461049	0.784723
Cp277	Positive	374.053	8.42	1.55782	2.92859	1.43726	0.415767	0.495136	1.25961	6.19113	1.09603	5.30622	3.88115	5.39161	1.67469	2.10219	3.93711	9.89667	2.14169	1.43882	0.649017	1.04189	0.4359	5.54285	2.2988	2.45041	10.7288	2.55533	1.9207	3.39303	0.939165	1.37866	1.67161	2.84458	2.91251	1.43	2.73386	2.02874	0.854108	2.031	2.91346	0.768991	2.61597	3.01495	12.1094	3.19824	2.20484	0.937513	2.08178
Cp1424	Positive	374.119	4.76	0.842458	1.35457	0.955216	0.802665	0.758645	0.832621	1.55744	1.05167	0.358544	1.93825	0.56453	2.24951	0.711966	1.7179	1.81672	0.841847	1.06384	1.03284	1.63589	1.85669	2.76404	3.80605	1.19266	1.75318	2.09913	2.12696	2.65541	0.660801	0.673042	1.08135	1.06213	2.48822	1.28328	1.04697	1.24624	0.673734	0.707846	1.74289	1.6699	1.67656	1.87345	1.81552	1.78185	3.24288	0.545184	0.732586
Cp1819	Positive	374.122	4.86	0.408165	0.436556	0.683217	0.538318	0.485828	0.570487	NA	0.789516	NA	1.18281	0.293246	0.757921	NA	1.41553	NA	0.582735	NA	0.626343	1.10622	1.16301	1.49031	2.77926	0.863926	1.0885	1.30163	NA	1.83508	NA	0.463784	0.616406	NA	1.67663	0.849567	0.558627	0.792098	0.363416	1.13865	0.931362	1.06191	1.58039	0.774731	1.5287	0.99808	2.57536	0.314987	0.372587
Cp1309	Positive	374.193	7.45	0.252427	0.468278	0.233939	0.305161	0.597094	0.248564	1.38423	0.76874	0.381577	0.441131	0.047169	0.113319	0.133613	0.46511	0.837703	0.198346	0.520296	0.217157	0.519595	0.38649	0.353874	0.810064	0.55812	0.705468	0.44773	1.02566	1.07405	0.255547	0.367635	0.297094	0.283965	0.586448	0.461955	0.818745	0.230608	0.197451	1.39253	0.257279	0.195719	1.04987	1.42109	1.1256	0.37564	0.784086	0.319298	0.294509
Cp1445	Positive	375.078	4.41	0.43016	0.513595	0.26227	0.437113	0.409439	0.5197	0.653948	0.607903	0.417787	1.03021	0.585245	0.526602	0.341983	1.30596	0.700951	0.407283	1.22731	0.633706	1.04913	0.792744	0.868895	1.03027	0.744933	0.532261	2.0125	1.38722	1.65438	0.45972	0.511737	0.420511	0.46966	0.982174	0.585292	0.556651	0.392766	0.521644	0.656628	0.551312	0.549298	1.23713	1.17062	0.757397	0.755602	1.01896	0.519186	0.567274
Cp1172	Positive	375.307	9.64	0.494521	1.60821	1.54729	0.461668	0.846695	1.3839	0.920798	NA	0.439276	0.785549	0.806864	NA	0.232837	1.35073	3.31385	0.817455	1.03459	NA	1.48409	1.16618	0.783103	0.380415	1.03709	NA	0.470396	NA	NA	NA	0.227194	1.24473	1.7177	NA	2.24923	3.39749	0.174029	2.11059	0.112678	0.832373	0.102314	NA	0.930932	0.744447	0.367134	2.1381	1.38301	0.64408
Cp1838	Positive	376.014	5.73	NA	NA	NA	NA	NA	NA	NA	NA	0.785592	NA	NA	NA	NA	0.779762	NA	NA	NA	NA	NA	NA	1.18224	NA	NA	NA	NA	NA	NA	0.162219	NA	NA	NA	NA	NA	NA	0.47296	NA	0.593072	NA	NA	NA	NA	1.66393	0.862131	NA	NA	NA
Cp989	Positive	376.053	8.42	0.481974	0.847844	0.413078	NA	0.130738	NA	1.75596	0.276942	1.4064	1.2262	1.42331	0.669989	0.6315	1.24924	2.93462	0.620179	0.449333	0.185951	0.36552	0.121632	1.53083	0.674711	0.767859	2.90254	0.670227	0.503578	0.87026	0.288668	0.449508	0.565197	0.797337	0.805737	0.499653	0.803361	0.604051	0.310852	0.629623	0.759482	0.191003	0.623443	0.90825	3.46281	0.930594	0.663468	0.284677	0.619156
Cp1178	Positive	376.211	9.26	1.28856	1.14872	0.233081	0.374068	1.2433	1.38295	1.92826	0.661556	1.96831	1.2057	0.643145	0.648857	0.497207	0.887555	0.897941	0.759257	2.93875	0.357059	0.938225	0.970374	1.7424	1.71163	1.0416	0.609285	1.08721	1.63156	1.62473	0.417914	0.685976	0.761905	0.692274	1.10882	0.34952	0.264917	0.669848	0.679738	1.0347	0.715933	0.476591	0.743662	2.23507	2.33108	1.5911	1.24287	0.607502	1.10199
Cp692	Positive	376.211	8.04	0.962176	1.23826	0.125912	0.128966	0.433618	1.49299	3.28937	2.11153	0.45756	1.85227	0.257433	1.22637	0.73018	0.750834	1.16901	0.69282	1.25856	0.344787	2.97954	1.17582	1.76693	1.43	0.53192	1.72203	2.05693	2.41127	2.30384	0.781214	0.98211	1.2637	1.43078	2.14555	0.891205	0.644439	0.936575	0.763654	1.90121	1.24563	0.790999	2.00554	1.41112	0.768303	0.669709	2.00448	0.477771	0.278868
Cp451	Positive	376.318	11.44	18.7199	17.9753	18.3657	16.8344	17.9136	18.0064	20.6423	21.8024	23.8789	37.4509	19.7727	18.1393	21.5582	24.869	12.7184	14.817	22.9634	15.3401	20.1063	21.8197	17.2411	28.1116	16.2912	13.5183	22.5125	12.9243	17.4367	9.34778	10.5261	13.384	17.6924	33.366	15.1853	14.0038	14.8242	19.9576	7.36597	20.7177	24.9215	18.85	30.386	20.7121	15.7157	21.0409	19.0829	8.42048
Cp203	Positive	376.318	11.44	15.1266	15.1693	15.5464	14.5631	14.6264	13.6049	16.1388	17.921	17.9468	31.3436	17.1391	13.798	18.3235	18.5648	10.8051	12.3427	18.352	12.6451	16.6286	17.6585	15.6995	22.7798	13.0477	11.8732	19.7376	10.2454	14.6889	7.80773	8.48782	9.987	15.7964	26.1941	12.6964	11.5986	12.4724	16.7109	5.51784	17.6511	20.8379	14.4584	24.8834	16.4453	12.8404	17.9762	16.4958	8.4098
Cp446	Positive	376.319	11.44	10.0535	13.4831	12.3524	11.8482	12.5903	12.2261	14.5295	14.3657	14.974	28.029	13.0042	10.2246	14.6036	13.6915	7.95841	10.3906	14.8415	9.82853	12.0934	15.7917	12.8904	17.6447	8.57663	8.87784	16.1433	9.24705	10.5408	5.33572	6.78875	7.14489	10.7443	22.7382	10.6734	8.86704	10.1231	13.3657	4.87006	14.4607	16.0022	11.7338	21.6893	10.788	10.2112	14.31	12.8945	6.30118
Cp604	Positive	377.11	5.56	0.407574	0.970338	1.07626	1.39584	0.435223	1.36307	1.24706	0.497298	0.239346	1.04558	0.331181	2.4431	2.01452	2.85854	3.81598	1.15113	2.09627	2.40673	1.50979	1.68858	2.92017	2.90385	1.58989	2.89642	0.968019	5.17015	1.021	0.805062	0.522474	1.31288	1.63389	2.38102	1.5029	0.836388	1.66275	1.04889	2.54922	1.7086	1.5985	2.3232	2.50758	2.15468	1.29856	3.84232	1.36864	1.45487
Cp661	Positive	377.113	4.03	0.598149	0.500412	0.581486	0.765944	0.342358	0.885827	1.26954	0.522963	0.339311	1.04094	0.371487	0.504477	0.212312	1.30677	1.35551	0.691216	1.93849	0.523024	1.33854	1.59891	0.925141	5.11447	1.07517	1.83111	0.855728	2.09719	0.805189	0.237441	0.390574	0.540676	1.32561	1.53094	1.51222	0.543666	1.79384	0.471614	1.04076	0.917772	0.955147	0.648901	1.20666	1.63162	2.51277	1.57115	0.495278	0.252673
Cp1428	Positive	377.335	11.59	1.02757	1.4426	0.657033	0.777668	0.793308	1.00971	1.04324	0.788905	1.00357	1.18489	1.54672	0.852519	0.729228	0.945734	1.08504	0.777765	1.33168	0.823047	1.70832	0.594497	1.46917	1.00162	1.19798	0.790442	0.991337	0.468039	1.05939	0.921059	0.881202	0.74768	0.474809	1.29846	0.580301	0.692708	0.892879	1.15749	1.05938	1.39326	0.760999	1.04237	2.4294	1.58514	1.63293	1.3333	0.844624	1.27061
Cp1141	Positive	378.153	5.4	1.12854	1.11137	0.181142	0.353938	1.03424	1.34063	2.55935	0.975285	0.394161	1.05471	0.494276	0.511427	0.169496	0.586963	0.728636	0.361388	1.03828	0.274661	0.821071	1.11799	1.15866	2.34486	0.796379	1.02699	1.05426	1.18257	1.01522	0.112906	0.367147	0.534444	0.639469	1.21044	0.329949	0.396317	0.734636	0.522578	0.924355	0.655243	0.576415	1.30445	1.27696	0.974556	1.32464	1.25519	0.266386	0.3895
Cp1359	Positive	379.09	4.11	0.329779	0.459901	0.355988	0.464322	0.38066	0.59091	1.26734	0.692477	0.152678	0.452499	0.204898	0.153173	0.213671	1.40583	1.28371	0.320734	0.82724	0.413627	0.849614	0.840202	0.857375	2.23247	0.506811	0.890404	0.833452	1.46849	0.883835	NA	0.192786	0.552463	0.621721	0.711872	0.585292	0.30994	0.674521	0.309384	1.00607	0.584823	0.354496	0.913242	0.776662	1.17958	0.739148	1.28389	0.230851	0.259921
Cp756	Positive	379.09	3.8	1.16412	0.714502	1.06668	0.847571	1.00771	1.56111	3.12844	1.70638	0.413988	0.708051	0.377726	0.353574	0.193011	2.06132	1.83817	0.64639	1.50162	0.430691	1.17481	1.18143	1.04102	4.08325	0.664695	1.72281	1.35153	4.07663	1.28846	0.37596	0.39875	0.980018	1.05687	1.81811	1.39795	0.621716	1.47357	0.427321	1.91483	0.660184	0.582311	1.03544	1.47916	1.58677	1.68243	1.50617	0.561776	0.329479
Cp474	Positive	379.137	12.02	2.467	3.85897	4.16197	2.71349	3.39898	4.25474	3.33897	4.40675	3.89709	4.68655	4.04942	1.92643	3.80042	5.92894	6.51878	3.78355	4.04384	3.0028	5.23401	3.94823	1.53354	2.36861	1.91999	2.89668	2.62046	2.91404	1.46198	9.58022	3.2288	5.95299	2.41995	2.31246	5.19066	4.21793	4.26953	4.54724	1.03866	5.38139	3.35094	2.0525	3.36934	3.12324	3.10356	3.3719	5.65421	3.1965
Cp978	Positive	380.041	3.32	0.725249	0.675913	0.846188	0.710088	0.705579	0.263746	0.444835	0.420057	1.14746	1.28833	0.636032	1.90828	0.742957	0.468827	2.76167	1.14493	0.901436	1.39048	0.624253	0.55619	1.36887	3.16189	1.08731	3.18053	0.688855	0.54837	1.13179	NA	0.975399	0.791709	1.25714	1.36715	1.71201	NA	0.84994	0.439595	1.53012	1.01661	0.612703	0.432365	1.95227	1.44868	1.96311	1.27265	0.564128	0.594487
Cp812	Positive	380.041	4.34	0.939295	0.672343	0.540707	0.589417	1.16081	0.22626	0.493658	0.683066	0.791647	1.48816	0.52697	0.807986	NA	0.733057	1.71693	1.03335	0.54862	0.419588	0.950438	0.592667	1.19417	3.86415	0.719825	2.05306	0.992509	0.403399	1.25475	NA	0.681217	0.691188	0.5114	1.59773	1.59983	NA	1.66035	0.970844	1.66666	0.698174	0.853881	0.779021	2.54925	1.36798	1.55805	2.60757	0.618215	0.566893
Cp845	Positive	380.076	4.41	1.04307	0.859379	0.447418	0.850668	0.762175	1.11598	1.52269	1.23671	0.749144	2.25209	1.3533	0.919745	0.693481	2.57701	1.6319	1.07935	2.91366	1.35834	2.70633	2.00431	1.76706	2.83451	1.5072	1.47897	3.52986	3.17408	3.04942	0.748977	0.946481	1.12701	0.946441	2.11616	1.52904	1.43976	0.77808	1.32852	1.76723	1.22323	1.19921	2.35064	2.29186	1.59863	1.82326	1.77827	1.02531	0.95741
Cp979	Positive	382.149	11.31	1.29225	1.66191	0.665761	0.153742	0.126673	0.311041	1.89636	0.248588	5.20079	2.1123	3.88857	0.989808	1.66003	1.98391	5.28938	0.774555	0.417314	0.207106	0.409116	NA	2.81595	0.763997	1.11474	7.49636	1.33993	0.214171	1.90265	0.441025	0.829345	0.606788	1.25045	1.33981	0.45946	2.0012	0.876208	0.389965	1.40265	1.16023	0.364452	1.06203	1.30736	7.50431	1.15425	0.805611	0.527808	2.13952
Cp366	Positive	382.184	3.89	5.5785	3.4117	1.58306	0.906192	2.46017	1.08952	1.21839	1.01134	5.18132	4.42251	3.03479	2.0223	0.501965	0.341156	3.95	3.57804	3.01033	0.967741	1.26157	1.18619	3.42841	10.6564	3.56569	4.73248	1.28926	1.05302	1.5723	NA	3.51627	2.47091	1.39474	4.18077	3.10444	NA	2.45384	0.913744	3.20946	1.78396	1.10632	1.30997	5.41668	5.94603	4.43461	2.60798	0.679749	1.27519
Cp866	Positive	382.231	7.95	NA	NA	NA	NA	NA	0.0491753	0.0900261	NA	NA	NA	NA	NA	NA	0.0439576	NA	NA	0.29663	NA	NA	0.188853	0.59634	0.766055	0.429029	0.627662	NA	NA	0.0979959	NA	0.109937	0.049448	0.0205962	0.122432	0.337568	0.200417	0.38784	0.340336	2.86968	3.04117	1.93361	2.47411	1.80395	1.48344	1.62652	1.82728	1.11833	1.9957
Cp1779	Positive	383.985	5.43	1.53789	1.57168	1.67292	1.29198	1.13342	1.4363	1.3314	1.24355	1.28304	1.64123	1.34032	1.57754	1.50372	1.64162	1.63966	1.10235	1.62523	1.4079	1.48438	1.31136	1.27807	1.67095	1.57816	1.53735	1.47437	1.45615	1.61709	1.80429	1.3179	1.51568	1.28069	1.62154	1.4916	1.80813	1.25571	1.61216	1.23992	1.74721	1.53274	1.54432	1.87441	1.5272	1.43702	1.50482	1.53927	1.44012
Cp1538	Positive	385.137	4.22	0.431784	0.38039	0.659179	0.301953	0.314007	0.383057	1.24732	0.458677	0.117655	0.268521	0.0658868	0.133033	0.104661	0.593104	0.429424	0.212682	0.503517	0.189574	0.297074	0.50739	0.464603	0.848375	0.134003	0.392288	0.463753	1.2916	0.503711	0.200198	0.0982232	0.282599	0.329211	0.401848	0.648209	NA	0.679825	NA	0.544183	0.225775	0.370478	0.361931	0.37144	0.406508	0.773728	0.469748	0.192049	NA
Cp1864	Positive	385.182	10.02	NA	NA	NA	NA	NA	NA	NA	1.18085	NA	0.643522	NA	NA	NA	NA	NA	NA	NA	NA	NA	NA	0.67915	NA	NA	0.909301	0.401745	NA	NA	NA	0.372272	NA	NA	NA	0.40206	NA	NA	NA	0.317081	NA	NA	NA	NA	NA	NA	0.280089	NA	NA
Cp804	Positive	385.194	3.58	1.03111	0.338918	0.358707	0.666067	0.737996	1.572	2.20687	0.573438	1.75604	1.82745	1.37127	2.48296	0.74486	2.31876	0.245667	0.740642	1.73853	0.513674	1.30999	1.57719	0.747323	NA	4.02215	0.638218	2.83019	0.817123	2.22254	0.20535	1.87844	0.619793	1.40712	1.1831	0.0950969	1.57765	0.598241	1.07384	0.949382	1.25057	0.949251	0.840828	1.6788	1.35475	1.95837	0.401113	0.236991	0.350843
Cp1225	Positive	386.122	4.56	0.856186	2.00549	1.06682	1.97984	0.877828	1.54015	1.92116	1.43653	0.262853	0.290618	NA	0.328612	0.761714	1.25085	1.52694	0.389631	1.80549	0.564165	0.692415	0.781032	2.09858	1.02109	0.611203	1.91909	1.74259	2.5364	1.82291	0.621939	0.43023	0.372282	1.51021	1.24554	1.205	0.514733	0.715187	0.227602	0.693645	0.442439	0.433491	1.96071	1.06879	1.66229	1.27012	1.03872	0.871407	0.160734
Cp1146	Positive	386.195	4.33	1.23055	1.43532	0.857491	0.914045	0.780684	1.1786	1.77546	1.46598	0.637425	1.0877	0.324567	0.591133	0.693073	1.99312	2.03714	0.745028	1.36955	0.793945	0.642997	0.784204	2.10034	3.23519	1.5001	1.31567	1.38735	1.70184	1.23743	0.325616	0.751377	0.702026	1.04964	1.44007	0.863227	1.16058	0.807506	0.275898	1.07265	0.82913	0.639952	1.19399	1.40082	1.00073	1.3528	1.24544	0.732661	0.358345
Cp168	Positive	386.279	11.19	8.60142	7.04875	6.31865	6.92004	7.39034	14.6096	7.62987	6.59649	4.0544	11.1972	5.89662	6.25682	3.20494	8.80283	8.54573	2.6628	14.9274	6.41631	8.80316	5.5974	9.43532	9.02263	3.97657	5.72089	13.1404	20.4745	13.7832	3.86559	5.55797	9.29812	7.83807	12.7993	9.30662	5.98202	6.7682	7.15199	13.147	7.29121	8.69077	16.5178	11.7106	9.37313	13.4186	16.8952	6.83094	6.70823
Cp147	Positive	386.279	11.34	3.26059	5.44397	NA	2.11456	3.44263	3.89855	6.73736	3.61161	1.19827	4.58039	NA	2.12158	NA	6.37433	9.82837	1.86974	4.67312	NA	3.92458	7.44726	5.6983	5.76813	7.44906	3.94243	4.91422	8.25344	5.07784	NA	2.0589	2.49746	4.96687	5.16335	3.24814	NA	2.4921	2.70855	6.04759	2.49218	7.18109	8.69553	6.85515	3.90313	5.07894	6.12486	1.98398	2.21887
Cp1516	Positive	387.257	11.01	0.662806	0.487229	NA	0.283703	0.423026	0.278929	0.637157	0.267287	0.622466	1.64844	1.00627	0.637227	0.36577	0.440384	0.358233	0.65987	0.544156	0.194132	NA	0.438218	1.36318	1.12969	1.10846	0.299755	0.597538	0.687172	NA	NA	0.8762	0.323783	0.357257	NA	0.288049	0.504994	0.300068	0.54926	0.822386	0.561041	0.914405	0.541835	0.979996	0.514474	0.781537	NA	0.215435	NA
Cp541	Positive	387.261	11.59	3.50239	3.04655	1.03663	1.93117	2.80605	3.20849	3.97833	2.43675	4.15615	6.73064	5.17461	3.25123	1.70692	2.81716	3.10438	3.31593	4.13189	1.26157	2.96733	3.19013	4.89948	4.76382	3.49569	2.36012	2.52394	3.04319	2.97764	1.02616	3.65085	2.74416	1.72022	3.96257	2.34511	2.29816	1.99199	3.02807	3.42725	4.31042	3.70753	2.44653	4.3199	3.69974	4.33547	4.02494	1.61818	1.32529
Cp350	Positive	388.104	10.69	6.75457	5.1078	1.23494	0.798904	NA	0.356454	1.09685	0.803327	4.12172	2.70074	2.1558	0.971228	2.59478	1.2578	5.35038	0.378505	0.28878	0.588943	0.1261	NA	3.58157	1.60525	1.50638	6.12569	0.950433	0.275057	1.91638	0.281749	4.62698	0.805528	0.69348	1.1178	0.557578	3.76628	0.70862	1.04609	1.83556	0.861714	1.29864	1.82097	2.66748	6.34518	0.617421	0.392855	0.30754	9.64722
Cp1371	Positive	388.192	9.05	1.36326	1.84867	0.525254	0.401941	0.617422	1.10403	2.16398	0.662534	0.608101	0.844313	0.553424	0.389456	0.747578	1.04674	1.36129	0.647139	0.826316	NA	0.362964	0.849961	1.21992	1.42953	1.50556	0.920249	0.779521	0.754763	0.903653	NA	0.553222	0.322157	0.592909	1.16705	0.340589	0.479307	1.06122	0.637579	0.522183	0.366306	0.443185	1.05878	0.742397	0.977282	1.20249	1.09491	0.407353	0.687697
Cp1095	Positive	388.257	11.34	2.63233	1.91403	1.94864	1.52713	0.969088	1.39048	2.58647	1.56718	1.33504	1.58967	1.21629	1.671	1.92032	2.50591	1.47416	1.08866	0.41439	0.787984	1.13206	0.580223	1.16544	2.05848	2.84887	2.03899	0.956685	2.61324	2.95298	0.609427	1.11828	0.746732	1.98096	1.75186	1.5758	2.29449	1.69533	1.93649	0.965096	0.688136	1.65811	1.40459	1.82937	2.16123	2.17938	1.96509	1.62732	2.62503
Cp1531	Positive	388.259	11.46	0.669892	1.1078	0.356704	0.394088	0.365681	0.800241	1.6888	0.163647	0.746651	NA	0.606708	1.26694	0.799229	0.312713	0.821427	0.305008	NA	0.760401	0.60778	NA	1.35708	NA	1.19621	1.20176	1.153	0.735317	0.986669	NA	1.1594	0.537019	1.22504	1.4402	0.426754	1.23962	0.914474	0.303647	1.15402	1.17721	0.373491	1.13529	NA	1.52529	1.35113	1.42806	1.00244	0.835715
Cp265	Positive	389.168	3.65	4.70607	6.10643	1.91372	4.39104	2.1651	4.78976	4.29439	5.422	0.694413	1.56197	1.08177	1.2719	1.60362	5.18441	3.31035	1.49401	4.55844	1.30996	3.25446	1.62294	4.59995	15.532	1.52016	2.32793	1.75887	3.83121	4.84565	1.19412	2.3659	2.61519	3.28499	7.23626	1.09283	3.32847	1.81872	2.8062	4.76204	1.89222	2.50846	6.3777	2.75837	2.16831	2.46202	4.97581	1.78279	1.25052
Cp1308	Positive	389.217	9.52	1.08691	0.732903	1.36357	0.78718	0.60469	0.799838	0.826122	0.84158	0.589817	1.42875	0.659991	1.05179	0.373517	0.62785	1.82767	0.558664	1.30813	0.820008	0.997867	0.891685	0.868895	1.06906	0.787372	0.443247	0.440565	1.79196	0.701732	0.222426	0.391429	0.895618	0.780137	0.868313	0.705346	1.39064	0.591548	1.58841	0.606459	0.420356	0.69838	0.434487	0.711672	0.801565	1.24126	0.45594	1.12316	0.895482
Cp1282	Positive	390.103	10.69	1.13961	0.88602	0.19917	0.133501	NA	0.0278123	0.131745	0.132605	0.732879	0.466429	0.412541	0.221108	0.415382	0.239666	0.816559	0.0633338	0.0244755	0.03892	0.0406134	0.0323295	0.658143	0.226856	0.175897	1.11809	0.158145	NA	0.390891	NA	0.705499	0.16433	0.204209	0.211671	0.0937834	0.641757	0.107474	0.249082	0.32069	0.106093	0.254278	0.363062	0.357284	1.09056	0.0937008	NA	0.0557857	1.93669
Cp1555	Positive	391.125	5.97	0.241651	0.322714	0.450566	0.187698	0.254415	0.264552	0.300173	0.230866	0.110175	0.580595	0.530838	0.519369	1.32892	1.49827	1.4521	0.424829	0.434401	0.377279	0.339533	0.400154	0.907793	0.684209	0.227615	0.354363	0.541653	0.562183	0.444414	NA	0.122382	0.188715	0.357038	0.420349	0.280562	NA	0.246142	0.203054	0.394489	0.665744	0.55087	0.427981	0.396857	0.387559	0.390141	0.63707	0.23882	0.402089
Cp1315	Positive	393.213	5.55	NA	NA	NA	NA	NA	NA	0.595309	NA	NA	NA	NA	NA	NA	NA	NA	NA	NA	NA	NA	NA	1.23985	NA	NA	NA	NA	NA	1.26583	NA	NA	NA	0.651958	0.715409	NA	NA	NA	NA	NA	NA	NA	NA	NA	NA	NA	NA	NA	NA
Cp1662	Positive	393.287	6.93	0.604349	0.366658	0.407212	0.277731	0.244037	0.316684	0.848725	0.32815	0.477149	0.772579	0.647887	0.654104	0.669014	0.74437	0.565263	0.671638	0.285085	0.249298	0.247656	0.259856	1.04129	1.18399	0.819713	0.859646	0.641568	0.470453	1.10448	0.348875	0.863998	0.327576	0.734562	0.757988	0.200045	0.422005	0.796771	0.332598	0.881519	0.68829	0.717375	0.82527	1.19668	0.87695	0.968102	0.843922	0.241303	0.457914
Cp485	Positive	393.344	11.43	5.51325	5.84633	5.54772	5.87979	6.12586	5.46034	6.97592	7.15514	6.34897	13.6108	7.22072	5.30687	7.23017	7.93402	3.71452	4.51414	7.55538	4.60191	6.44332	8.08275	6.00962	9.24078	5.25998	5.46623	8.04142	4.50994	5.50072	2.48746	3.4588	3.82402	6.17273	10.004	4.81487	3.97418	5.32823	7.26739	3.5539	7.06482	7.3531	5.16999	11.0452	6.75155	5.99531	7.3282	6.42058	2.34094
Cp1809	Positive	394.213	9.56	0.536888	NA	0.0874232	0.0955633	0.106452	0.24413	NA	0.359315	NA	NA	0.0746218	NA	0.302565	0.428425	NA	0.872123	NA	0.341631	0.248934	0.335007	1.95396	0.184271	2.20724	0.107912	0.946394	0.564999	0.124367	NA	1.23407	0.27867	1.40788	0.223098	1.39388	4.22781	NA	0.736038	0.124667	NA	NA	0.594449	0.246769	NA	NA	2.33832	0.0922358	0.604914
Cp1096	Positive	394.216	10.86	1.8966	1.89357	1.22679	1.67612	1.61903	0.835712	1.38501	1.11412	0.219282	0.96152	1.46785	0.973639	1.98285	0.744208	0.990123	0.548715	1.56935	0.914562	1.13675	0.815924	1.86817	2.52819	1.83798	1.23186	1.09959	1.14462	2.04137	0.812716	2.92729	1.3141	1.08229	1.48319	1.12776	0.59998	0.792098	0.608629	0.609369	1.7608	1.32759	1.19399	1.66464	1.07557	1.38836	1.58009	0.62932	2.44382
Cp942	Positive	394.276	10.72	4.32212	4.259	1.78023	2.02596	3.66976	4.25138	6.19707	2.96264	1.66284	2.91963	1.21217	1.90615	2.29996	3.01724	3.4754	1.64422	3.95286	1.40673	3.87829	3.48061	4.80488	5.43615	2.9826	2.89981	3.74624	5.56859	4.56414	0.901481	2.18592	2.68482	2.85849	4.30103	2.60558	1.7854	2.36846	2.2352	4.43565	2.09993	2.7347	5.53164	4.4687	3.01078	4.88485	4.87414	1.67671	2.27634
Cp1247	Positive	395.084	3.91	0.379231	0.352238	0.629991	0.710752	0.349419	0.737361	0.51807	0.38767	0.145792	0.457143	0.234847	0.650417	0.544373	1.47759	1.79223	0.396478	0.990871	0.794295	0.808149	0.791768	1.14985	1.67269	0.5805	1.35581	1.17697	2.04542	1.00383	0.305449	0.354946	0.689427	0.867671	1.27696	0.61235	0.511063	0.784773	0.550728	1.14121	0.73848	0.526241	1.3036	1.28323	1.21775	1.28239	1.48641	0.476726	0.881875
Cp1223	Positive	395.192	5.06	NA	NA	0.0525111	NA	NA	NA	0.975046	NA	0.858251	0.686114	0.593855	1.43911	NA	1.32212	NA	0.696779	NA	NA	NA	NA	1.98188	1.20979	1.06698	0.453152	0.606787	0.424454	1.58167	NA	NA	NA	0.957944	0.663036	NA	NA	1.0371	NA	0.833561	0.704351	NA	0.664459	0.0534075	1.57218	1.32046	0.969007	NA	0.471139
Cp854	Positive	395.252	1.33	2.3926	2.07113	1.90285	1.19443	1.27165	1.2189	2.84674	1.43445	1.88355	2.58177	2.02914	2.72732	2.49011	2.93918	2.36008	1.85134	1.81072	1.17216	1.34038	1.22938	3.555	4.24979	3.86072	1.09202	2.74005	2.15647	4.62438	1.31807	2.74988	1.31721	2.47462	3.33463	0.915767	2.03776	2.83145	1.6275	2.91345	2.11769	2.21514	2.485	4.21405	3.37775	3.74176	2.44255	1.52019	2.37337
Cp1571	Positive	395.978	5.87	0.362403	0.602032	0.653456	0.411121	0.216114	0.688723	0.575289	0.643346	NA	0.646564	0.236094	0.602337	0.327167	0.866061	0.284153	0.188932	0.708711	0.657666	0.400169	0.538256	0.736209	0.257884	1.1303	0.742351	0.847912	1.28208	0.594061	NA	0.387158	0.414686	0.910288	0.279824	0.589758	0.270704	0.602662	0.203054	0.48086	NA	0.658948	0.169438	0.723415	0.894263	0.526648	0.372279	0.395203	0.154757
Cp1163	Positive	395.979	5.99	0.803486	0.966218	1.37001	1.23945	1.42239	1.17806	1.21645	1.02478	1.36793	2.47722	0.964718	2.45346	1.44908	1.81131	2.47295	0.726413	2.81806	0.865123	0.587048	1.11092	2.87666	2.21109	1.20521	2.57333	1.8795	2.41302	2.4875	0.306627	1.65064	1.15925	1.70423	1.37436	0.125701	1.36679	1.73916	0.96951	0.740322	1.16579	0.80672	0.510437	2.34848	1.63108	1.43284	1.41628	0.776166	0.85924
Cp1580	Positive	396.021	1.32	0.30616	0.578413	1.20504	0.396521	0.400024	0.501964	1.08483	0.474688	0.29847	0.802681	0.332304	1.36281	0.915036	1.50425	1.50382	0.465696	0.874805	1.23153	0.618715	0.722839	1.29243	1.49222	0.87225	1.39243	0.873184	1.17305	1.15176	0.293526	0.356044	0.294114	0.710241	1.0404	1.10793	0.575563	0.966885	0.496696	1.21944	1.02896	0.902352	0.736025	1.43412	0.962968	1.12469	0.849201	1.04425	0.466815
Cp1149	Positive	396.034	3.57	1.47899	1.40634	0.842467	0.395415	0.80818	1.24739	1.93214	1.32372	1.09593	2.22455	0.956856	1.90558	1.10288	2.04532	1.42289	0.42194	2.45632	1.59327	1.62595	2.21146	2.61387	2.57378	2.21501	1.61972	2.15658	1.82173	2.2486	0.411289	0.641562	1.00278	1.34916	1.71119	1.00876	1.61505	1.83728	1.79027	1.92018	2.66946	0.912308	2.76179	2.33948	2.24097	2.37877	2.86005	1.26008	1.37756
Cp383	Positive	396.036	6.09	3.03917	6.23386	5.8077	3.30755	2.85773	4.82267	5.38994	1.80098	1.56798	6.98427	3.45107	2.90404	2.80043	5.21269	5.21332	4.27728	5.44818	3.97931	3.59471	6.34244	6.10612	7.18515	5.9012	5.7235	5.94515	4.36537	6.46133	1.53078	1.42454	3.27278	2.53005	6.57649	5.21824	2.6599	4.94834	5.44911	5.29563	5.32888	6.35812	8.06318	9.3867	5.0489	8.36419	9.30209	2.45758	3.97448
Cp1255	Positive	396.196	10.85	2.24764	2.00481	1.729	1.14598	0.986313	1.23798	2.05445	1.12463	1.62069	2.04137	1.46012	1.67143	1.41442	1.67168	2.38442	1.16761	0.935455	1.03763	1.31056	1.03747	2.1021	2.05753	1.83047	1.78446	1.51202	1.60085	2.42025	0.853197	1.69652	1.30123	1.75024	1.77907	1.30456	1.9638	1.67399	1.90393	1.72393	2.10487	1.4903	1.54135	2.2962	1.96342	1.61982	1.8794	1.23813	1.72153
Cp1509	Positive	396.197	9.42	1.06197	0.547652	0.521105	0.374179	0.849263	0.65379	0.547906	0.689177	0.435002	0.699724	0.327687	0.981298	0.517188	0.549308	0.524648	NA	0.456106	0.584852	NA	0.569976	0.677931	0.57181	0.781095	0.642389	0.641568	0.471257	0.953119	NA	0.445726	NA	0.45739	0.655282	0.503856	0.557074	0.50226	NA	0.385992	NA	0.401526	0.725559	0.606465	0.548554	1.04619	0.538789	0.479208	0.789809
Cp1744	Positive	396.197	10.51	1.03584	0.822988	0.555588	0.341993	0.316574	0.287931	0.649557	0.70201	0.253356	0.76041	0.527219	NA	0.450858	0.630274	0.826294	0.329293	NA	0.187471	NA	0.243386	0.524102	0.989111	0.566035	0.542296	0.541392	0.671079	0.647584	NA	0.448776	0.382985	NA	0.509044	NA	0.651355	0.484327	0.784734	0.628692	0.456956	0.427857	NA	0.825887	0.518972	0.579773	0.612974	0.346472	0.538281
Cp1182	Positive	396.211	12.65	0.904162	1.00233	NA	0.792489	0.649732	0.300829	1.07373	NA	1.1179	1.05295	0.541445	0.73452	1.33653	1.49116	1.38061	0.869449	1.22531	1.01122	0.827036	0.367947	0.930698	1.17259	1.01362	1.13738	0.867192	0.273581	1.69152	0.712176	0.647541	0.273522	0.783314	1.14514	0.337962	0.995733	1.07752	0.780731	0.62066	1.25227	0.590302	0.943651	0.991579	1.02677	1.02443	1.12428	0.453602	0.769717
Cp32	Positive	396.287	11.06	110.053	73.5931	74.4343	38.5776	36.4317	52.105	75.333	49.997	52.3922	67.9362	57.4331	58.7528	61.6415	82.9538	103.202	38.8447	37.0734	35.6743	54.3806	39.5377	67.8611	86.4092	69.3798	80.9836	56.0117	57.9196	92.3399	21.6648	65.3548	44.8767	76.4621	73.2961	35.6738	95.5798	70.9792	87.6764	61.487	73.7831	57.4567	59.6183	77.3965	79.0343	86.1645	64.0961	47.5128	86.5402
Cp1530	Positive	397.258	11.43	1.66691	0.782615	0.159107	0.49673	0.221356	0.756574	0.929451	0.994351	0.567854	1.27327	0.678959	0.513129	0.960298	1.11963	1.03728	0.616114	0.204116	0.286231	0.593296	0.377584	0.447391	1.4805	0.85915	0.832016	0.865368	0.728075	0.392764	0.174437	1.15391	0.47023	0.763594	0.820428	0.210027	0.493703	0.676163	0.586482	0.37796	0.581734	0.926719	0.530521	1.271	0.663472	0.71642	0.770955	0.501157	0.318798
Cp714	Positive	398.084	3.94	2.18726	2.25089	1.61697	2.29429	0.806682	2.12999	3.30487	2.02647	0.390362	0.81421	0.322321	0.466184	0.317789	1.71677	1.54002	0.620607	1.92186	0.507012	1.55367	1.50948	1.22683	4.97247	0.626623	2.51143	1.62444	3.53953	2.89462	0.390975	0.754915	1.06862	0.867342	1.98666	1.18622	0.752975	1.64418	0.474416	2.38859	0.584051	0.672965	1.60203	2.23523	2.76894	1.79719	1.86762	0.549888	0.735892
Cp205	Positive	398.245	10.59	0.468245	0.248146	0.114036	0.291335	0.157378	0.119714	0.188448	NA	1.7412	0.735591	2.57358	0.133742	0.0341167	NA	0.119107	0.409209	0.65391	0.0219729	0.0729904	0.16543	1.59738	7.12325	16.0975	0.283725	0.330489	0.229594	NA	0.33857	NA	NA	0.0728537	0.0942724	NA	1.17893	NA	0.0888529	0.271102	0.237666	NA	0.235347	NA	0.18635	0.169693	0.794375	NA	NA
Cp80	Positive	398.338	11.08	NA	NA	NA	NA	NA	NA	NA	NA	NA	NA	NA	NA	NA	NA	NA	NA	NA	NA	NA	NA	NA	NA	NA	NA	NA	NA	NA	NA	NA	NA	NA	NA	NA	NA	NA	NA	NA	NA	NA	NA	NA	NA	NA	NA	NA	NA
Cp1153	Positive	399.126	10.36	0.997605	1.1008	1.60953	0.890486	1.03585	1.26754	0.376508	1.0183	0.855283	0.971448	0.816972	0.943714	1.02078	1.12027	1.4159	1.00788	1.29258	1.13943	1.59045	1.25439	0.564897	0.578617	0.654597	0.815465	0.557676	0.664106	0.792237	2.43182	0.960757	1.50349	0.724593	0.77853	1.56463	1.31344	1.10126	1.33933	0.632882	1.33118	0.989601	1.02285	0.848569	0.973874	1.40593	0.814545	1.61596	1.15617
Cp1396	Positive	400.212	11	0.833158	0.736199	0.0772643	0.205505	0.640638	0.675018	1.31061	0.687832	0.380983	0.785709	0.306349	0.118	0.212856	0.269402	0.255403	0.193425	0.854948	0.0316736	0.660464	0.713689	1.32008	1.73617	0.872114	0.473613	0.449684	0.10152	0.46314	NA	0.0845573	0.171104	0.160059	0.589305	0.314187	0.148337	0.375211	0.367285	1.2554	0.685356	0.76244	0.580447	1.27486	1.2322	1.65301	1.63058	0.223404	0.342323
Cp1594	Positive	401.132	4.3	0.268665	0.451524	0.413793	0.351505	0.315612	0.421349	0.69528	0.365182	0.178797	0.394696	0.120793	0.254437	0.642238	1.145	1.03637	0.240176	0.884349	0.428938	0.448593	0.532278	0.832843	0.908374	0.352339	0.624143	0.818081	1.17184	0.634477	0.177087	0.243789	0.385694	0.582282	0.363894	0.461036	0.28877	0.438862	0.282035	0.740322	0.410936	0.517595	0.739419	0.935115	0.724816	0.77819	0.9376	0.311329	0.393315
Cp869	Positive	401.168	6.15	0.401227	0.59448	0.532552	0.684649	0.484009	1.58731	1.21877	0.75774	0.357357	0.458423	0.281142	0.301098	0.451673	2.8587	1.44617	0.96584	1.53518	0.471715	1.37517	0.749801	1.23971	1.0537	0.572039	1.43778	3.1246	3.43452	1.66796	0.405254	0.452437	0.707174	0.806101	1.16528	0.679207	0.491162	0.383799	0.780998	0.87954	0.403523	0.917287	1.09909	1.59804	1.0434	0.652419	1.65576	0.656494	0.366865
Cp554	Positive	401.205	3.59	5.87034	4.78165	3.46559	2.38565	2.22383	2.63195	4.74258	2.4673	2.35262	3.75481	2.60889	3.08898	2.84134	4.22429	4.79181	2.14062	2.76927	2.27022	2.73586	2.61735	4.73088	5.70496	3.46103	4.47274	2.7407	3.9896	5.12871	0.846132	2.11784	2.24914	3.98011	2.9589	2.27287	4.83724	3.25819	3.9174	3.24776	3.52284	2.09972	3.00661	3.75848	4.08757	3.71722	3.88415	2.56497	4.88064
Cp1643	Positive	401.226	4.38	0.50884	NA	NA	NA	NA	NA	1.00992	NA	NA	NA	NA	NA	NA	NA	0.703233	NA	1.13111	NA	NA	NA	NA	1.46514	NA	NA	1.06741	0.809479	NA	NA	NA	NA	NA	NA	NA	NA	0.471319	NA	0.710872	NA	NA	NA	NA	NA	1.02165	NA	NA	NA
Cp515	Positive	401.349	9.54	0.334355	NA	0.141079	NA	3.37212	0.253401	0.362946	5.59237	0.262497	NA	0.131399	NA	0.129127	0.490483	0.914978	0.100671	1.92109	0.18373	2.9635	1.14044	0.194217	1.26789	0.15802	0.245278	0.169348	0.515782	NA	0.290876	0.189125	0.766105	0.645056	0.222554	0.414013	1.20786	0.378621	0.299912	NA	0.224385	NA	0.864164	0.851464	0.187713	0.2026	0.154868	0.356663	0.34423
Cp1	Positive	402.225	11.25	507.446	545.578	58.0241	136.223	460.134	456.941	831.578	425.034	396.213	1137.79	686.794	322.478	145.04	347.606	301.026	400.508	729.215	175.111	542.433	650.362	818.225	1267.89	786.545	446.214	425.432	395.558	456.06	61.829	473.342	250.093	217.778	582.121	226.21	250.578	451.834	447.447	695.346	779.043	618.696	592.109	958.467	736.652	975.66	838.649	106.974	175.28
Cp608	Positive	403.148	4.94	1.61834	2.2833	2.70869	1.5351	1.47674	2.21168	3.57276	2.23851	0.744039	2.57537	0.928655	2.82901	2.58173	5.26731	5.37304	1.41988	3.43211	2.13815	2.91266	2.76789	4.77533	5.94179	2.51099	3.00003	3.96457	3.83443	2.3803	0.870568	1.12401	2.02317	2.47626	3.53215	1.8469	2.00996	2.45561	1.26569	2.70078	3.45396	2.29846	3.18949	4.53353	3.52007	3.33725	4.21176	1.46885	1.20525
Cp1759	Positive	403.148	3.69	0.196037	0.449876	0.278438	0.545617	0.181878	0.421483	0.523236	0.402824	NA	0.278769	NA	0.098144	0.186487	0.527168	0.539404	0.188076	0.414697	0.167251	0.341379	0.392102	0.372713	0.628326	0.346471	0.501634	0.453983	0.521012	0.704228	0.152357	0.249768	0.275689	0.47689	0.420485	0.271236	0.443034	0.273547	0.075645	0.302298	0.437961	0.19323	NA	0.565444	0.406372	0.291699	0.476517	0.168533	0.063963
Cp701	Positive	403.344	8.93	0.611583	1.24746	0.991988	0.376612	0.61004	NA	4.19222	0.585415	1.01283	0.328086	0.431384	0.447179	0.781423	1.61544	1.34607	0.829758	0.834013	0.475104	0.40869	0.256196	0.457149	0.739617	0.37813	0.953873	0.659806	1.1241	0.847789	0.14956	0.361657	0.752422	0.20903	0.589713	0.330737	0.89369	0.461215	0.786201	0.902006	0.53556	0.609952	0.5226	1.31347	0.373109	0.532226	0.675652	0.774206	0.775313
Cp1498	Positive	405.163	3.53	0.22187	0.570173	0.586494	0.291114	0.209694	0.288468	0.797964	0.286352	0.175236	0.518629	NA	0.392292	0.540975	0.91212	1.01051	0.232474	0.635131	0.396914	0.422464	0.383928	0.963361	0.748799	0.339102	0.736877	0.327493	1.09607	0.424129	0.206381	0.114207	0.295604	0.383331	0.341176	0.436605	NA	0.279104	0.439462	1.27391	0.469464	0.619123	1.11634	0.976136	1.16363	0.499737	1.16137	0.262467	0.149671
Cp672	Positive	405.163	3.64	1.05104	0.674952	1.92961	1.27296	0.744629	1.57845	2.36703	0.658989	0.950261	2.05962	0.525098	1.6805	2.01289	5.77169	0.333895	1.00724	3.51061	1.3705	1.91976	1.20241	1.81816	0.565478	1.49846	2.29521	3.09581	2.59916	2.43195	0.627238	0.957951	0.686853	2.56182	3.12799	0.598296	1.99358	0.5966	0.401973	2.9408	1.81238	2.47832	2.88045	3.49964	0.851186	1.96618	2.42265	0.844363	0.53116
Cp1106	Positive	405.272	10.77	3.29396	2.39247	0.989985	0.996667	1.81899	1.9963	3.43417	1.60286	1.66438	3.08231	1.85082	1.57087	1.23092	1.94884	1.52268	1.36842	4.23318	1.29909	3.53265	3.15182	3.49564	4.53886	3.32047	1.82108	1.94516	2.53626	2.70409	0.575275	1.81146	1.3206	1.39835	2.0593	1.28236	1.0265	1.52977	1.84483	3.08526	2.33049	2.08479	3.07719	3.6301	2.73323	3.51252	3.49306	0.84985	1.72725
Cp385	Positive	406.147	4.54	5.42733	2.97707	1.52983	1.14355	1.24576	1.48305	11.0627	1.89802	0.734541	1.69343	NA	0.917192	NA	1.32745	1.19305	0.541654	1.76423	NA	2.37261	2.75887	1.36196	8.43547	1.82378	1.49682	3.02885	0.700047	2.0111	NA	0.735393	0.426743	0.587212	2.01128	0.895277	NA	2.57596	0.224133	2.70788	0.851831	1.75034	2.12505	2.30055	2.2557	3.21092	3.86046	0.487439	NA
Cp274	Positive	406.147	3.32	3.18073	2.53625	3.092	2.6834	2.27433	1.08145	1.96314	1.64918	3.92475	5.33952	2.29156	8.02285	2.6766	1.52898	12.2796	4.722	3.66116	5.52056	2.17764	2.25465	6.97434	15.2646	4.35074	12.4991	2.39666	1.86746	4.0662	0.58293	3.63536	2.69119	5.38077	6.10649	5.73957	NA	3.73557	1.44619	6.78477	3.35667	2.3975	1.7634	7.63326	6.04882	7.95731	6.19241	1.85935	2.39702
Cp1630	Positive	406.266	10.18	NA	NA	NA	0.0805209	0.536861	0.298545	0.492754	0.256287	0.503031	0.809567	0.484917	1.07533	0.453032	NA	0.605118	0.268955	0.291397	0.179406	0.30176	0.349769	0.487102	0.536032	0.479656	0.770371	0.374129	0.279348	0.722017	0.163691	0.363365	0.124771	0.379387	0.536659	0.307095	0.351718	0.75661	0.359414	0.38378	1.17582	0.182488	0.649043	0.760253	0.830328	0.659391	0.343038	0.232941	0.404124
Cp777	Positive	406.327	10.98	3.7315	4.54587	4.50694	3.63881	2.37179	3.32565	3.73679	3.545	3.76032	6.67396	5.13156	0.853654	4.50993	5.05819	3.51084	3.1837	3.71858	2.43665	4.36381	3.4506	3.49686	4.69084	1.61282	3.36782	5.20875	2.51185	3.90064	2.73962	2.23985	2.82693	3.8401	6.78258	3.1135	4.11504	3.42893	4.46092	1.7294	5.69226	4.15622	4.39536	4.53562	4.56946	3.36709	4.74351	3.92407	2.17258
Cp902	Positive	407.121	4.25	0.684654	0.698572	0.712406	0.962932	0.834284	1.47701	2.36909	1.18525	0.428591	0.928696	0.446483	0.443066	0.261109	1.75329	1.27671	0.830721	1.87476	0.365357	0.996873	1.29208	0.934899	2.66528	1.0652	1.51038	1.25734	3.29773	0.763057	0.332682	0.417418	0.694168	1.55918	1.85892	1.30193	0.658694	1.37758	0.351543	1.13458	0.702961	0.687768	0.510437	1.04515	1.41964	1.46045	0.790043	0.480123	0.183623
Cp1457	Positive	407.139	8.99	0.330665	0.358418	0.305337	0.288128	0.353592	0.344227	0.541448	0.290508	0.385969	0.442572	0.273281	0.773664	0.143807	0.522804	0.41193	0.362672	0.98379	0.527232	0.516613	0.13554	0.50323	0.546956	0.258182	0.309009	0.507783	0.295575	0.2659	0.405696	0.203523	0.218655	0.251318	0.557336	0.221324	0.517414	0.284787	0.742976	0.389135	0.827122	0.503053	0.472957	0.837147	0.292953	0.423327	0.453232	0.651007	0.391153
Cp830	Positive	407.162	7.47	0.395765	0.548888	0.2906	0.42561	0.677655	1.0699	1.63029	0.57686	0.783574	1.74947	1.16013	1.2563	0.394042	1.39226	1.18574	0.793277	2.94568	0.618396	1.31937	1.3959	2.21215	2.10139	2.47019	1.69231	2.27109	3.35781	1.5812	0.420416	0.80726	0.937615	0.736754	1.67908	0.787964	1.0361	1.23816	0.893332	1.40137	2.27042	1.51309	1.62437	3.34199	2.32358	2.19974	2.60284	0.947573	0.607966
Cp33	Positive	408.29	11.15	19.6741	19.7591	8.73387	22.5815	28.9649	35.1153	44.3614	24.4042	4.83809	13.4898	10.5817	18.288	11.5968	20.7444	22.2824	14.2097	55.1337	9.27289	34.6516	22.739	52.7866	53.721	18.9547	20.0698	21.0342	53.2803	40.2488	3.6885	12.8719	13.565	20.9238	21.5427	14.2045	7.27584	11.3247	25.6429	36.8119	20.4236	26.7848	30.4957	22.5409	28.0385	41.0022	53.6441	15.5568	16.8685
Cp190	Positive	408.29	11.31	5.03482	3.21079	1.9359	2.98646	2.96686	4.99129	4.73457	3.40739	1.31818	4.57351	1.83135	1.98529	2.73709	9.13332	5.30535	2.07044	9.87423	2.15357	8.64823	7.73371	8.14587	11.389	4.51954	5.44903	7.14349	13.4939	7.62636	0.255841	1.9907	2.63713	3.4433	5.13193	5.71343	2.2935	1.74901	3.41923	8.86582	2.39689	2.54343	3.60927	3.23614	3.36017	9.49515	12.8636	2.22215	1.55152
Cp1094	Positive	408.293	11.47	3.7653	3.48132	0.356274	2.748	1.04398	3.17705	3.92744	1.11498	1.75699	1.56453	0.511621	1.66462	1.70665	3.63329	1.67008	0.966161	2.07241	1.13476	3.37985	2.26526	1.72071	5.82053	4.29316	1.50138	2.49945	4.75106	1.55467	NA	1.44321	1.74463	2.6029	0.991017	2.24042	NA	1.57801	0.765389	4.8391	0.673002	1.93217	4.27075	2.26773	3.39697	1.52821	2.16382	0.744158	2.98235
Cp1355	Positive	408.335	9.04	1.45493	1.10821	1.34354	1.06292	1.4394	1.69628	1.69035	0.997039	0.721363	0.946789	0.420777	0.238127	1.2543	1.11963	2.43477	0.654307	0.846636	0.207924	NA	NA	NA	NA	NA	0.47218	0.29675	0.85977	0.472971	0.307363	0.455853	0.443677	0.393739	NA	0.360422	0.488481	0.800055	0.680939	0.18671	0.1325	NA	0.795852	NA	0.520063	NA	NA	0.574188	0.661502
Cp788	Positive	408.338	10.52	1.95963	NA	NA	NA	NA	NA	2.70621	2.12509	1.80495	2.71211	2.04511	2.00004	1.99984	NA	2.08551	1.62817	3.38747	1.41842	1.89449	1.83961	2.19033	2.58549	2.28147	NA	2.49072	NA	2.42337	1.01733	2.01229	1.94974	1.45817	NA	1.84139	0.160475	2.16034	1.6299	2.11062	2.23243	1.88069	1.81192	2.42747	2.40756	2.23766	2.2552	1.42952	1.94674
Cp466	Positive	408.793	11.15	9.76643	6.68086	7.34584	8.2118	12.4192	10.1289	13.6887	7.97399	3.92689	4.26079	4.82796	2.27334	4.84988	3.26369	7.18003	4.74875	8.37061	3.2701	7.045	15.4501	10.8324	16.2466	5.6744	9.49208	6.24881	15.4654	8.06375	2.60832	3.7786	10.0752	3.88217	6.57404	10.9531	5.79868	8.20956	3.40149	12.1208	6.38116	5.09132	20.8545	6.72018	9.19809	13.0996	11.3068	2.77126	3.16013
Cp1622	Positive	409.102	4.38	0.444479	0.50206	0.488482	0.820141	0.289507	0.735883	0.945597	0.434601	0.114568	0.348581	0.160724	0.489727	0.55647	0.844406	0.991492	0.326618	1.35939	0.331697	0.499999	0.466155	0.94032	0.714763	0.403238	0.895617	1.05126	1.34591	0.793174	0.187686	0.20694	0.380546	0.537693	0.723299	0.361079	0.418194	0.431663	0.185844	0.668036	0.417113	0.352137	0.729519	0.794196	0.508067	0.6672	0.963863	0.466928	0.228258
Cp1070	Positive	410.218	5.74	0.671811	0.234414	0.232365	0.945567	0.433511	NA	0.618429	0.427512	0.373622	0.595806	NA	1.38323	0.272662	0.528461	1.51553	0.320734	0.173483	0.448924	0.316245	0.500559	0.565304	2.65072	0.360254	1.22417	0.320849	NA	0.385742	NA	0.418638	0.238299	0.43274	1.32267	0.868613	NA	0.771387	0.147154	0.523696	0.418966	0.379124	NA	1.60287	1.15109	1.2262	0.810484	0.682232	NA
Cp1085	Positive	410.303	11.45	3.30547	2.65367	2.01245	1.11059	1.1989	1.29173	1.48162	1.43421	0.615462	2.30541	1.28342	0.500222	0.439984	1.71483	2.51752	0.398618	1.58583	1.35507	1.61246	1.35577	1.75067	2.39916	1.98276	2.1555	1.42682	1.6663	2.34816	0.533175	0.411439	1.10655	1.00286	1.88055	1.37812	2.63082	2.25518	2.65038	0.5663	0.510079	1.61134	1.90286	2.25583	2.35685	2.01457	1.99054	1.14642	2.88724
Cp872	Positive	410.351	11.82	3.81475	2.79127	2.40063	2.38211	2.28824	3.84306	5.03978	2.39984	2.40771	3.41424	1.21254	1.91863	2.24654	2.96827	3.03761	1.61779	2.5456	0.736324	3.2583	1.75726	1.80257	2.80032	1.59658	2.53476	2.09522	2.72147	2.91475	1.10521	2.51134	2.09917	1.49673	2.67214	1.52286	1.39812	1.95789	1.98465	2.21759	2.13019	1.323	NA	2.79762	3.17845	3.10704	3.96402	NA	1.41443
[truncated: 3,079 more rows]
[truncated: 10 more columns]
